# Supplementary material for: Palladium-catalyzed remote para-C–H activation of arenes assisted by a recyclable pyridine-based template
Source: Royal Society of Chemistry journal article supplement (doi:10.1039/d0sc07042d), 2021-01-01
Supplement: d0sc07042d1.pdf [file d0sc07042d1.pdf]

# Electronic Supplementary Information

## Palladium-Catalyzed Remote *para*-C–H Activation of Arenes Assisted by a Recyclable Pyridine-Based Template

Xiaoxi Chen,<sup>a,b</sup> Shuai Fan,<sup>a</sup> Meng Zhang,<sup>a</sup> Yuzhen Gao,<sup>a</sup> Shangda Li,<sup>a</sup> and Gang Li<sup>\*,a,b</sup>

<sup>a</sup>Key Laboratory of Coal to Ethylene Glycol and Its Related Technology, State Key Laboratory of Structural Chemistry, Center for Excellence in Molecular Synthesis, Fujian Institute of Research on the Structure of Matter, Chinese Academy of Sciences, Fuzhou, Fujian, 350002, China

<sup>b</sup>Fujian College, University of Chinese Academy of Sciences, Beijing, 100049, China

\*E-mail: gangli@fjirsm.ac.cn

## Table of Contents

|     |                                                           |      |
|-----|-----------------------------------------------------------|------|
| 1   | General Information.....                                  | S3   |
| 2   | Experimental Section.....                                 | S4   |
| 2.1 | Synthesis of Different Scaffolds.....                     | S4   |
| 2.2 | Synthesis of Directing Template.....                      | S13  |
| 2.3 | Synthesis of Substrates.....                              | S14  |
| 2.4 | Optimization of Reaction Conditions.....                  | S28  |
| 2.5 | General Procedures and Characterizations of Products..... | S36  |
| 2.6 | Scaled-up Reactions.....                                  | S71  |
| 2.7 | Synthetic Applications and Hydrolysis.....                | S71  |
| 3   | NMR Spectre of Compounds.....                             | S78  |
| 4   | References.....                                           | S218 |

# 1 General Information

Unless otherwise noted, commercial available reagents were purchased from commercial suppliers (such as Strem, Alfa Aesar, J&K Chemical Co., Energy Chemical, Sinocompound and Adamas) and used as received. Solvents were generally dried over 4 Å molecular sieves. Hexafluoroisopropanol (HFIP) was dried over 4 Å molecular sieves and distilled before use. The reaction vessels used for C–H functionalization were 15 mL sealed tube or 50 mL Schlenk tube (Synthware). Purification of products was performed by flashchromatography (FC) using silica gel or preparative thin layer chromatography.  $^1\text{H}$  and  $^{13}\text{C}$  NMR spectra were recorded on a Bruker AVANCE III spectrometer (400 MHz and 101 MHz, respectively). Chemical shifts are reported parts per million (ppm) referenced to  $\text{CDCl}_3$  ( $\delta$  7.26 ppm) or  $\text{DMSO-d}_6$  ( $\delta$  2.50 ppm), tetramethylsilane (TMS,  $\delta$  0.00 ppm) for  $^1\text{H}$  NMR;  $\text{CDCl}_3$  ( $\delta$  77.16 ppm) or  $\text{DMSO-d}_6$  ( $\delta$  39.52 ppm) for  $^{13}\text{C}$  NMR. The following abbreviations (or combinations thereof) were used to explain multiplicities: s = singlet, d = doublet, t = triplet, q = quartet, hept = heptaplet, m = multiplet, and br = broad. To distinguish, some  $^{13}\text{C}$  NMR chemical shifts retain two decimal places. High-resolution mass spectra (HRMS) were obtained on an Impact II UHR-TOF mass spectrometry equipped with an ESI source from Bruker at Fujian Institute of Research on the Structure of Matter.

## 2 Experimental Section

### 2.1 Synthesis of Different Scaffolds.

#### General Procedure I

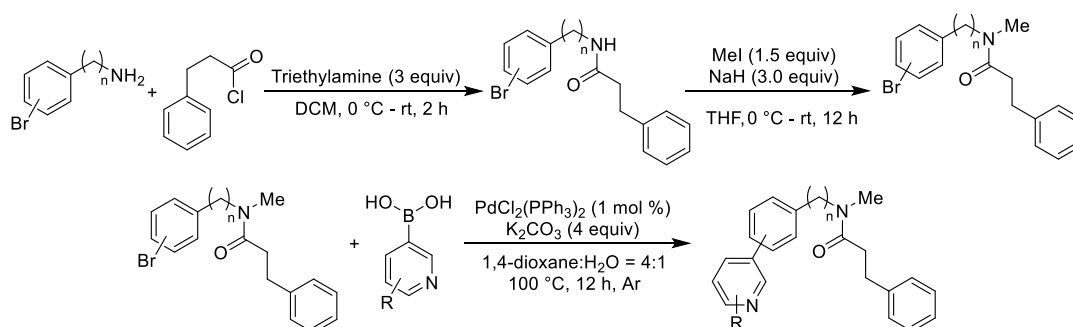

To a solution of (3-bromophenyl)methanamine (3.0 mmol), hydrocinnamoyl chloride (3.6 mmol) and triethylamine (9.0 mmol) in DCM (10 mL) at room temperature stirred for 6 h. Then the crude reaction mixture was extracted with EtOAc and water, the combined organic phase was dried over anhydrous Na<sub>2</sub>SO<sub>4</sub> and concentrated under reduced pressure. The residue was purified by flash silica gel chromatography using petroleum ether/EtOAc (5:1-2:1) as the eluent to give *N*-(3-bromobenzyl)-3-phenylpropanamide.

To a dry round bottom flask under nitrogen atmosphere was charged with *N*-(3-bromobenzyl)-3-phenylpropanamide (3.0 mmol) and NaH (60% dispersion in mineral oil, 9.0 mmol). The bottom was placed into an ice bath for 10 minutes followed by addition of anhydrous THF (15 mL). After stirred for 0.5 h at 0 °C, MeI (4.5 mmol) was added dropwise to the mixture. The reaction was allowed to warm to room temperature and stirred for 12 h. H<sub>2</sub>O was slowly added (be careful!!) to quench the reaction. Then the crude reaction mixture was extracted with EtOAc and water, the combined organic phase was dried over anhydrous Na<sub>2</sub>SO<sub>4</sub> and concentrated under reduced pressure. The residue was purified by flash silica gel chromatography using petroleum ether/EtOAc (5:1-3:1) as the eluent to give *N*-(3-bromobenzyl)-*N*-methyl-3-phenylpropanamide.

To a solution of *N*-(3-bromobenzyl)-*N*-methyl-3-phenylpropanamide (1.0 mmol), PdCl<sub>2</sub>(PPh<sub>3</sub>)<sub>2</sub> (0.01 mmol), pyridin-3-ylboronic acid (1.1 mmol) and K<sub>2</sub>CO<sub>3</sub> (4.0 mmol) in 1,4-dioxane:H<sub>2</sub>O = 4 mL: 1 mL under nitrogen atmosphere at 100 °C stirred for 12



h. Then the crude reaction mixture was extracted with EtOAc and water, the combined organic phase was dried over anhydrous  $\text{Na}_2\text{SO}_4$  and concentrated under reduced pressure. The residue was purified by flash silica gel chromatography using petroleum ether/EtOAc (3:1-2:1) as the eluent to give the desired compound.

## General Procedure II

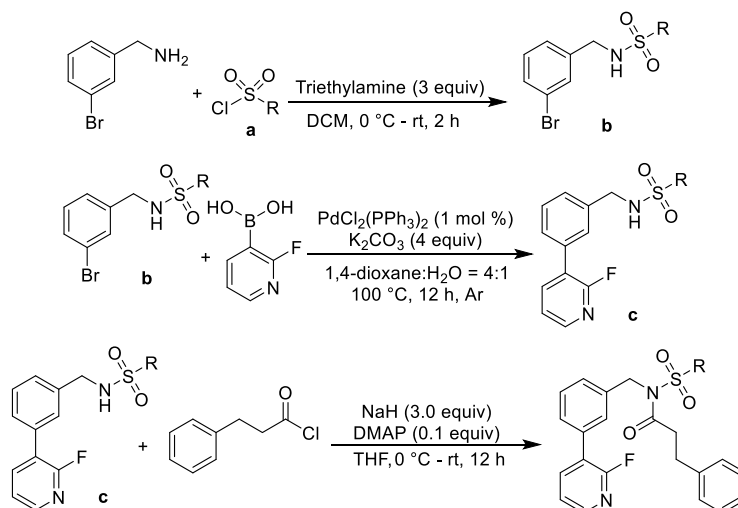

To a solution of (3-bromophenyl)methanamine (3.0 mmol), **a** (3.6 mmol) and triethylamine (9.0 mmol) in DCM (10 mL) at room temperature stirred for 6 h. Then the crude reaction mixture was extracted with EtOAc and water, the combined organic phase was dried over anhydrous  $\text{Na}_2\text{SO}_4$  and concentrated under reduced pressure. The residue was purified by flash silica gel chromatography using petroleum ether/EtOAc (5:1-2:1) as the eluent to give **b**.

To a solution of **b** (1.0 mmol),  $\text{PdCl}_2(\text{PPh}_3)_2$  (0.01 mmol), (2-fluoropyridin-3-yl)boronic acid (1.1 mmol) and  $\text{K}_2\text{CO}_3$  (4.0 mmol) in 1,4-dioxane : H<sub>2</sub>O = 4 mL : 1 mL under nitrogen atmosphere at 100 °C stirred for 12 h. Then the crude reaction mixture was extracted with EtOAc and water, the combined organic phase was dried over anhydrous  $\text{Na}_2\text{SO}_4$  and concentrated under reduced pressure. The residue was purified by flash silica gel chromatography using petroleum ether/EtOAc (3:1-2:1) as the eluent to give **c**.

To a dry round bottom flask under nitrogen atmosphere was charged with **c** (1.0 mmol) and NaH (60% dispersion in mineral oil, 3.0 mmol). The bottom was placed into an ice bath for 10 minutes followed by addition of anhydrous THF (5 mL). After stirred for 0.5 h at 0 °C, hydrocinnamoyl chloride (1.2 mmol) was added dropwise to the mixture. The reaction was allowed to warm to room temperature and stirred for 12 h. H<sub>2</sub>O

was slowly added (be careful!!) to quench the reaction. Then the crude reaction mixture was extracted with EtOAc and water, the combined organic phase was dried over anhydrous Na<sub>2</sub>SO<sub>4</sub> and concentrated under reduced pressure. The residue was purified by flash silica gel chromatography using petroleum ether/EtOAc (5:1-3:1) as the eluent to give the desired compound.

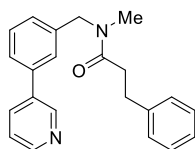

### ***N*-methyl-3-phenyl-*N*-(3-(pyridin-3-yl)benzyl)propanamide (1a<sub>1</sub>)**

The general procedure **I** was followed. Yield: 231 mg, (70 %). Two rotamers can be observed on the NMR spectrum and the ratio is about 65:35.

<sup>1</sup>H NMR (400 MHz, Chloroform-*d*) δ 8.88 (s, 0.61H), 8.85 (s, 0.38H), 8.65 – 8.62 (m, 1H), 7.89 (d, *J* = 8.0 Hz, 0.65H), 7.85 (d, *J* = 7.6 Hz, 0.37H), 7.56 – 7.43 (m, 3H), 7.41 – 7.37 (m, 1H), 7.35 – 7.27 (m, 4H), 7.25 – 7.14 (m, 2H), 4.71 (s, 1.29H), 4.58 (s, 0.69H), 3.11 – 3.05 (m, 2H), 3.03 (s, 1.22H), 2.93 (s, 1.91H), 2.75 (td, *J* = 7.8, 2.3 Hz, 2H). <sup>13</sup>C NMR (101 MHz, Chloroform-*d*) δ 172.4, 172.2, 148.5, 148.3, 148.03, 148.00, 141.1, 141.0, 138.4, 138.3, 138.0, 137.5, 136.2, 136.0, 134.4, 134.3, 129.6, 129.2, 128.31, 128.29, 128.26, 127.6, 126.6, 126.3, 126.01, 125.98, 125.7, 124.8, 123.50, 123.46, 53.0, 50.7, 35.1, 34.8, 34.7, 33.9, 31.3, 31.1. HRMS (*m/z*, ESI-TOF): Calcd for C<sub>22</sub>H<sub>22</sub>N<sub>2</sub>O<sub>2</sub>Na<sup>+</sup> [*M*+Na<sup>+</sup>] 353.1624, found 353.1625.

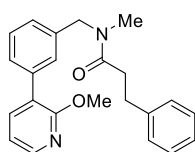

### ***N*-(3-(2-methoxypyridin-3-yl)benzyl)-*N*-methyl-3-phenylpropanamide (1a<sub>2</sub>)**

The general procedure **I** was followed. Yield: 180 mg, (50 %). Two rotamers can be observed on the NMR spectrum and the ratio is about 58:42.

<sup>1</sup>H NMR (400 MHz, Chloroform-*d*) δ 8.20 (td, *J* = 4.7, 1.9 Hz, 1H), 7.62 (dd, *J* = 7.3, 1.9 Hz, 0.62H), 7.58 (dd, *J* = 7.3, 1.9 Hz, 0.48H), 7.53 – 7.47 (m, 1H), 7.44 – 7.38 (m, 1.67H), 7.33 (s, 0.45H), 7.30 – 7.16 (m, 5.57H), 7.10 (d, *J* = 7.6 Hz, 0.43H), 6.99 (dd, *J* = 7.3, 5.0 Hz, 1H), 4.68 (s, 1.16H), 4.54 (s, 0.83H), 3.99 (s, 1.59H), 3.98 (s, 1.29H), 3.10 – 3.03 (m, 2H), 3.02 (s, 1.40H), 2.91 (s, 1.73H), 2.73 (q, *J* = 7.7 Hz, 2H). <sup>13</sup>C NMR (101 MHz, Chloroform-*d*) δ 172.6, 172.2, 160.8, 160.7, 146.0, 145.8, 141.3, 141.2,

138.6, 138.5, 137.5, 137.3, 137.0, 136.5, 128.83, 128.80, 128.44, 128.41, 128.39, 128.37, 128.2, 127.2, 126.9, 126.10, 126.08, 125.3, 124.3, 124.0, 117.13, 117.12, 53.51, 53.49, 53.2, 50.8, 35.4, 34.9, 34.8, 34.1, 31.5, 31.3. HRMS (m/z, ESI-TOF): Calcd for  $C_{23}H_{24}N_2O_2Na^+$  [M+Na<sup>+</sup>] 383.1730, found 383.1731.

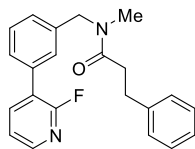

### ***N*-(3-(2-fluoropyridin-3-yl)benzyl)-*N*-methyl-3-phenylpropanamide (1a<sub>3</sub>)**

The general procedure **I** was followed. Yield: 296 mg, (85 %). Two rotamers can be observed on the NMR spectrum and the ratio is about 65:35.

<sup>1</sup>H NMR (400 MHz, Chloroform-*d*) δ 8.25 – 8.17 (m, 1H), 7.89 – 7.79 (m, 1H), 7.52 – 7.40 (m, 3H), 7.31 – 7.24 (m, 5H), 7.22 – 7.12 (m, 2H), 4.67 (s, 1.37H), 4.55 (s, 0.73H), 3.08 – 3.01 (m, 2H), 3.00 (s, 1H), 2.92 (s, 2H), 2.72 (t, *J* = 7.8 Hz, 2H). <sup>13</sup>C NMR (101 MHz, Chloroform-*d*) δ 172.7, 172.4, 160.41 (d, *J*<sub>C-F</sub> = 240.1 Hz), 160.36 (d, *J*<sub>C-F</sub> = 239.9 Hz), 146.7 (d, *J*<sub>C-F</sub> = 14.6 Hz), 146.4 (d, *J*<sub>C-F</sub> = 14.7 Hz), 141.33, 141.26, 140.8 (d, *J*<sub>C-F</sub> = 4.4 Hz), 140.7 (d, *J*<sub>C-F</sub> = 4.3 Hz), 138.1, 137.3, 134.7 (d, *J*<sub>C-F</sub> = 4.8 Hz), 134.3 (d, *J*<sub>C-F</sub> = 5.0 Hz), 129.4, 129.0, 128.51, 128.49, 128.4 (d, *J*<sub>C-F</sub> = 2.9 Hz), 128.2, 128.1, 127.9 (d, *J*<sub>C-F</sub> = 3.0 Hz), 126.6 (d, *J*<sub>C-F</sub> = 3.0 Hz), 126.3, 126.2, 123.9, 123.6, 123.3, 121.98, 121.95, 121.9, 53.2, 50.9, 35.4, 35.02, 34.96, 34.1, 31.5, 31.4. HRMS (m/z, ESI-TOF): Calcd for  $C_{22}H_{21}FN_2ONa^+$  [M+Na<sup>+</sup>] 371.1530, found 371.1531.

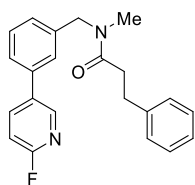

### ***N*-(3-(6-fluoropyridin-3-yl)benzyl)-*N*-methyl-3-phenylpropanamide (1a<sub>4</sub>)**

The general procedure **I** was followed. Two rotamers can be observed on the NMR spectrum and the ratio is about 66:34.

<sup>1</sup>H NMR (400 MHz, Chloroform-*d*) δ 8.30 (d, *J* = 2.6 Hz, 0.57H), 8.27 (d, *J* = 2.6 Hz, 0.35H), 7.82 (dtd, *J* = 19.6, 8.0, 2.6 Hz, 2H), 7.38 – 7.28 (m, 2.64H), 7.21 – 7.01 (m, 6.54H), 6.90 (dd, *J* = 8.5, 2.9 Hz, 1H), 4.57 (s, 1.31H), 4.45 (s, 0.65H), 2.97 – 2.91 (m, 2H), 2.90 (s, 1.10H), 2.81 (s, 1.87H), 2.62 (t, *J* = 7.8 Hz, 2H). <sup>13</sup>C NMR (101 MHz, Chloroform-*d*) δ 172.6, 172.4, 163.3 (d, *J*<sub>C-F</sub> = 239.6 Hz), 163.2 (d, *J*<sub>C-F</sub> = 239.4 Hz),

145.9 (d,  $J_{C-F} = 14.7$  Hz), 141.3, 141.2, 139.9 (d,  $J_{C-F} = 8.0$  Hz), 139.8 (d,  $J_{C-F} = 7.9$  Hz), 138.6, 137.8, 137.5, 137.1, 134.6 (d,  $J_{C-F} = 4.5$  Hz), 134.4 (d,  $J_{C-F} = 4.5$  Hz), 129.9, 129.4, 128.51, 128.48, 128.46, 127.8, 126.7, 126.4, 126.2, 126.1, 126.0, 124.9, 109.6 (d,  $J_{C-F} = 37.5$  Hz), 109.5 (d,  $J_{C-F} = 37.5$  Hz), 53.2, 50.9, 35.3, 35.01, 34.98, 34.2, 31.5, 31.3. HRMS (m/z, ESI-TOF): Calcd for  $C_{22}H_{21}FN_2ONa^+$  [ $M+Na^+$ ] 371.1530, found 371.1531.

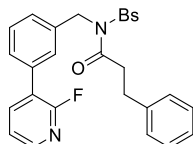

***N*-(3-(2-fluoropyridin-3-yl)benzyl)-3-phenyl-*N*-(phenylsulfonyl)propanamide (1a5)**

The general procedure **II** was followed. Yield: 380 mg, (80 %).

$^1H$  NMR (400 MHz, Chloroform-*d*)  $\delta$  8.20 (d,  $J = 4.2$  Hz, 1H), 7.79 (t,  $J = 8.2$  Hz, 1H), 7.72 (d,  $J = 7.8$  Hz, 2H), 7.60 (t,  $J = 7.4$  Hz, 1H), 7.51 – 7.35 (m, 6H), 7.28 (d,  $J = 5.8$  Hz, 1H), 7.18 – 7.10 (m, 3H), 6.99 (d,  $J = 7.0$  Hz, 2H), 5.13 (s, 2H), 2.98 – 2.91 (m, 2H), 2.90 – 2.83 (m, 2H).  $^{13}C$  NMR (101 MHz, Chloroform-*d*)  $\delta$  172.5, 160.4 (d,  $J_{C-F} = 240.6$  Hz), 146.6 (d,  $J_{C-F} = 14.8$  Hz), 140.9 (d,  $J_{C-F} = 4.5$  Hz), 140.2, 139.6, 137.3, 134.4 (d,  $J_{C-F} = 4.9$  Hz), 133.9, 129.3, 129.2, 128.5, 128.4 (d,  $J_{C-F} = 3.4$  Hz), 128.34, 128.27 (d,  $J_{C-F} = 2.5$  Hz), 128.1, 127.7, 126.3, 123.6 (d,  $J_{C-F} = 28.1$  Hz), 122.0 (d,  $J_{C-F} = 4.4$  Hz), 49.3, 38.1, 30.7. HRMS (m/z, ESI-TOF): Calcd for  $C_{27}H_{23}FN_2O_3SNa^+$  [ $M+Na^+$ ] 497.1306, found 497.1306.

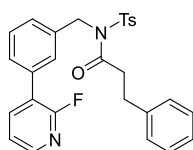

***N*-(3-(2-fluoropyridin-3-yl)benzyl)-3-phenyl-*N*-tosylpropanamide (1a6)**

The general procedure **II** was followed. Yield: 342 mg, (70 %).

$^1H$  NMR (400 MHz, Chloroform-*d*)  $\delta$  8.20 (dt,  $J = 4.9, 1.6$  Hz, 1H), 7.82 – 7.77 (m, 1H), 7.60 (d,  $J = 8.4$  Hz, 2H), 7.53 – 7.45 (m, 2H), 7.44 – 7.36 (m, 2H), 7.29 – 7.22 (m, 3H), 7.19 – 7.11 (m, 3H), 7.03 – 6.96 (m, 2H), 5.12 (s, 2H), 2.97 – 2.93 (m, 2H), 2.89 – 2.85 (m, 2H), 2.40 (s, 3H).  $^{13}C$  NMR (101 MHz, Chloroform-*d*)  $\delta$  172.5, 160.4 (d,  $J_{C-F} = 240.1$  Hz), 146.5 (d,  $J_{C-F} = 14.7$  Hz), 145.1, 140.8 (d,  $J_{C-F} = 4.4$  Hz), 140.2, 137.4, 136.6, 134.3 (d,  $J_{C-F} = 5.0$  Hz), 129.9, 129.1, 128.5, 128.32, 128.28, 128.2 (d,  $J_{C-F} = 2.4$  Hz), 128.1, 127.7, 126.2, 123.6 (d,  $J_{C-F} = 28.2$  Hz), 121.9 (d,  $J_{C-F} = 4.4$  Hz), 49.3,

38.0, 30.7, 21.7. HRMS (m/z, ESI-TOF): Calcd for C<sub>28</sub>H<sub>25</sub>FN<sub>2</sub>O<sub>3</sub>S Na<sup>+</sup> [M+Na<sup>+</sup>] 511.1462, found 511.1463.

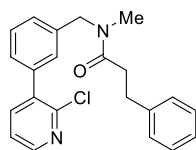

### ***N*-(3-(2-chloropyridin-3-yl)benzyl)-*N*-methyl-3-phenylpropanamide (1a7)**

The general procedure **I** was followed. Yield: 218 mg, (60 %). Two rotamers can be observed on the NMR spectrum and the ratio is about 64:36.

<sup>1</sup>H NMR (400 MHz, Chloroform-*d*) δ 8.32 (td, *J* = 5.1, 1.9 Hz, 1H), 7.58 (dd, *J* = 7.6, 2.0 Hz, 0.69H), 7.53 (dd, *J* = 7.5, 2.0 Hz, 0.42H), 7.33 (t, *J* = 7.8 Hz, 1H), 7.29 – 7.12 (m, 7H), 7.11 – 7.05 (m, 2H), 4.58 (s, 1.29H), 4.45 (s, 0.69H), 2.97 – 2.91 (m, 2H), 2.91 (s, 1.32H), 2.82 (s, 1.92H), 2.62 (td, *J* = 7.8, 7.4, 2.5 Hz, 2H). <sup>13</sup>C NMR (101 MHz, Chloroform-*d*) δ 172.7, 172.5, 149.70, 149.67, 148.7, 148.5, 141.34, 141.29, 139.8, 139.6, 138.2, 137.8, 137.7, 137.0, 136.8, 136.5, 129.1, 128.8, 128.7, 128.6, 128.53, 128.51, 128.49, 128.3, 128.1, 127.1, 126.3, 126.2, 122.7, 53.2, 50.8, 35.4, 35.1, 35.0, 34.2, 31.6, 31.4. HRMS (m/z, ESI-TOF): Calcd for C<sub>22</sub>H<sub>21</sub>ClN<sub>2</sub>ONa<sup>+</sup> [M+Na<sup>+</sup>] 387.1235, found 387.1235.

### **Preparation of 3-(2-fluoropyridin-3-yl)benzyl 3-phenylpropanoate:**

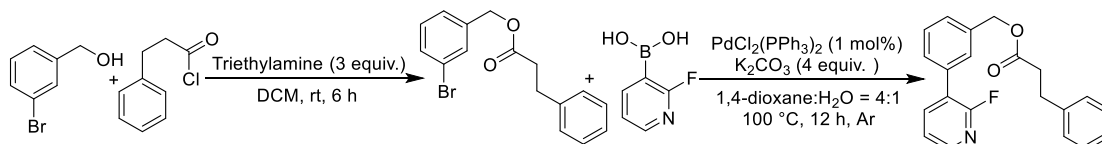

To a solution of (3-bromophenyl)methanol (2.0 mmol), hydrocinnamoyl chloride (2.4 mmol) and triethylamine (6.0 mmol) in DCM (10 mL) at room temperature stirred for 6 h. Then the crude reaction mixture was extracted with EtOAc and water, the combined organic phase was dried over anhydrous Na<sub>2</sub>SO<sub>4</sub> and concentrated under reduced pressure. The residue was purified by flash silica gel chromatography using petroleum ether/EtOAc (5:1-2:1) as the eluent to give 3-bromobenzyl 3-phenylpropanoate.

To a solution of 3-bromobenzyl 3-phenylpropanoate (1.0 mmol), PdCl<sub>2</sub>(PPh<sub>3</sub>)<sub>2</sub> (0.01 mmol), (2-fluoropyridin-3-yl)boronic acid (1.1 mmol) and K<sub>2</sub>CO<sub>3</sub> (4.0 mmol) in 1,4-dioxane:H<sub>2</sub>O = 4 mL: 1 mL under nitrogen atmosphere at 100 °C stirred for 12 h. Then the crude reaction mixture was extracted with EtOAc and water, the combined

organic phase was dried over anhydrous  $\text{Na}_2\text{SO}_4$  and concentrated under reduced pressure. The residue was purified by flash silica gel chromatography using petroleum ether/EtOAc (5:1-3:1) as the eluent to give 3-(2-fluoropyridin-3-yl)benzyl 3-phenylpropanoate.

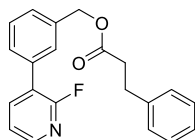

### 3-(2-fluoropyridin-3-yl)benzyl 3-phenylpropanoate (1a9)

$^1\text{H}$  NMR (400 MHz, Chloroform-*d*)  $\delta$  8.24 (d,  $J = 3.8$  Hz, 1H), 7.90 – 7.85 (m, 1H), 7.59 – 7.51 (m, 2H), 7.48 (t,  $J = 7.6$  Hz, 1H), 7.38 (d,  $J = 7.7$  Hz, 1H), 7.32 – 7.27 (m, 3H), 7.24 – 7.16 (m, 3H), 5.20 (s, 2H), 3.02 (t,  $J = 7.7$  Hz, 2H), 2.74 (t,  $J = 7.7$  Hz, 2H).  $^{13}\text{C}$  NMR (101 MHz, Chloroform-*d*)  $\delta$  172.7, 160.4 (d,  $J_{\text{C-F}} = 240.3$  Hz), 146.6 (d,  $J_{\text{C-F}} = 14.7$  Hz), 140.8, 140.3, 136.6, 134.2 (d,  $J_{\text{C-F}} = 4.9$  Hz), 129.0, 128.7 (d,  $J_{\text{C-F}} = 3.1$  Hz), 128.6 (d,  $J_{\text{C-F}} = 2.9$  Hz), 128.5, 128.31, 128.27, 126.3, 123.5 (d,  $J_{\text{C-F}} = 28.3$  Hz), 121.9 (d,  $J_{\text{C-F}} = 4.4$  Hz), 66.0, 35.8, 30.9. HRMS ( $m/z$ , ESI-TOF): Calcd for  $\text{C}_{21}\text{H}_{18}\text{FNO}_2\text{Na}^+$  [ $\text{M}+\text{Na}^+$ ] 358.1214, found 358.1215.

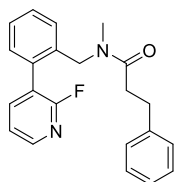

### *N*-(2-(2-fluoropyridin-3-yl)benzyl)-*N*-methyl-3-phenylpropanamide (1a10)

The general procedure **I** was followed. Yield: 244 mg, (70 %). Two rotamers can be observed on the NMR spectrum and the ratio is about 61:39.

$^1\text{H}$  NMR (400 MHz, Chloroform-*d*)  $\delta$  8.25 (dd,  $J = 13.5, 4.8$  Hz, 1H), 7.73 – 7.59 (m, 1H), 7.43 – 7.08 (m, 10H), 4.52 (s, 1.23H), 4.27 (br, 0.72H), 2.93 (t,  $J = 7.9$  Hz, 2H), 2.88 (s, 1.12H), 2.72 (s, 1.72H), 2.80 – 2.56 (m, 1.18H), 2.54 – 2.47 (m, 0.85H).  $^{13}\text{C}$  NMR (101 MHz, Chloroform-*d*)  $\delta$  172.8, 172.2, 160.3 (d,  $J_{\text{C-F}} = 237.7$  Hz), 160.1 (d,  $J_{\text{C-F}} = 237.9$  Hz), 147.5 (d,  $J_{\text{C-F}} = 14.4$  Hz), 147.0 (d,  $J_{\text{C-F}} = 14.3$  Hz), 142.0 (d,  $J_{\text{C-F}} = 4.4$  Hz), 141.8 (d,  $J_{\text{C-F}} = 4.4$  Hz), 141.3, 141.1, 135.6, 135.0, 133.3 (d,  $J_{\text{C-F}} = 3.5$  Hz), 132.7 (d,  $J_{\text{C-F}} = 3.3$  Hz), 130.8, 130.5, 129.4, 129.1, 128.50, 128.49, 128.45, 128.1, 127.8, 127.4, 126.2, 126.1, 125.9, 122.8 (d,  $J_{\text{C-F}} = 32.2$  Hz), 122.3 (d,  $J_{\text{C-F}} = 32.5$  Hz), 121.9 (d,  $J_{\text{C-F}} = 4.3$  Hz), 121.6 (d,  $J_{\text{C-F}} = 4.4$  Hz), 51.1 (d,  $J_{\text{C-F}} = 4.1$  Hz), 48.4 (d,  $J_{\text{C-F}}$

= 2.4 Hz), 35.1, 34.8, 34.6, 34.1, 31.5, 31.2. HRMS (m/z, ESI-TOF): Calcd for  $C_{22}H_{21}FN_2ONa^+$   $[M+Na^+]$  371.1530, found 371.1530.

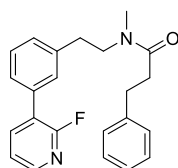

### ***N*-(3-(2-fluoropyridin-3-yl)phenethyl)-*N*-methyl-3-phenylpropanamide (1a<sub>11</sub>)**

The general procedure I was followed. Yield: 272 mg, (75 %). Two rotamers can be observed on the NMR spectrum and the ratio is about 57:43.

$^1H$  NMR (400 MHz, Chloroform-*d*)  $\delta$  8.27 – 8.25 (m, 1H), 7.97 – 7.92 (m, 0.57H), 7.89 – 7.84 (m, 0.44H), 7.55 – 7.42 (m, 3H), 7.39 – 7.27 (m, 5H), 7.20 (dd,  $J = 27.2, 7.5$  Hz, 2H), 3.77 – 3.66 (m, 1.14H), 3.58 (t,  $J = 7.0$  Hz, 0.85H), 3.07 – 2.95 (m, 3.69H), 2.93 – 2.87 (m, 3.40H), 2.67 (t,  $J = 7.9$  Hz, 1.14H), 2.45 – 2.36 (m, 0.87H).  $^{13}C$  NMR (101 MHz, Chloroform-*d*)  $\delta$  172.2, 172.1, 160.4 (d,  $J_{C-F} = 240.1$  Hz), 160.3 (d,  $J_{C-F} = 240.3$  Hz), 146.5, 146.4, 146.2, 141.4 (d,  $J_{C-F} = 2.9$  Hz), 140.8 (d,  $J_{C-F} = 4.5$  Hz), 139.8, 138.9, 134.4 (d,  $J_{C-F} = 5.1$  Hz), 134.1 (d,  $J_{C-F} = 4.8$  Hz), 129.3 (d,  $J_{C-F} = 2.9$  Hz), 129.22 (d,  $J_{C-F} = 2.9$  Hz), 129.17, 129.0, 128.94, 128.90, 128.47, 128.45, 128.42, 128.36, 127.3 (d,  $J_{C-F} = 3.0$  Hz), 126.9 (d,  $J_{C-F} = 3.0$  Hz), 126.1, 126.0, 124.0, 123.7, 123.4, 121.94 (d,  $J_{C-F} = 4.4$  Hz), 121.88 (d,  $J_{C-F} = 4.5$  Hz), 51.4, 49.9, 36.0, 35.5, 34.71, 34.70, 33.6, 31.4, 31.2. HRMS (m/z, ESI-TOF): Calcd for  $C_{23}H_{23}FN_2O Na^+$   $[M+Na^+]$  385.1687, found 385.1686.

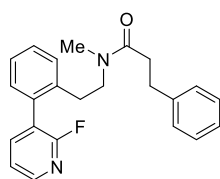

### ***N*-(2-(2-fluoropyridin-3-yl)phenethyl)-*N*-methyl-3-phenylpropanamide (1a<sub>12</sub>)**

The general procedure I was followed. Yield: 236 mg, (65 %). Two rotamers can be observed on the NMR spectrum and the ratio is about 52:48.

$^1H$  NMR (400 MHz, Chloroform-*d*)  $\delta$  8.30 (d,  $J = 4.7$  Hz, 0.52H), 8.16 (d,  $J = 4.7$  Hz, 0.48H), 7.79 (t,  $J = 9.1$  Hz, 0.53H), 7.60 (t,  $J = 7.7$  Hz, 0.51H), 7.45 – 7.27 (m, 6H), 7.24 – 7.17 (m, 3H), 7.14 (d,  $J = 7.5$  Hz, 1H), 3.46 (t,  $J = 8.0$  Hz, 1H), 3.27 (t,  $J = 7.2$  Hz, 1H), 2.94 (t,  $J = 8.0$  Hz, 1H), 2.82 (t,  $J = 8.0$  Hz, 1H), 2.77 – 2.72 (m, 3.54H), 2.67

(s, 1.56H), 2.55 (t,  $J = 7.6$  Hz, 1H), 2.16 (t,  $J = 7.8$  Hz, 1H).  $^{13}\text{C}$  NMR (101 MHz, Chloroform-*d*)  $\delta$  171.9, 171.8, 160.5 (d,  $J = 238.8$  Hz), 160.2 (d,  $J = 238.7$  Hz), 147.2 (d,  $J = 14.3$  Hz), 147.0 (d,  $J = 14.2$  Hz), 142.4 (d,  $J = 4.6$  Hz), 142.0 (d,  $J = 4.4$  Hz), 141.41, 141.37, 137.5, 136.7, 133.8 (d,  $J = 3.7$  Hz), 133.6 (d,  $J = 3.6$  Hz), 130.7, 130.4, 129.97, 129.95, 129.2, 128.9, 128.52, 128.48, 128.45, 128.4, 127.2, 126.6, 126.12, 126.09, 123.5 (d,  $J = 32.2$  Hz), 123.2 (d,  $J = 32.3$  Hz), 121.7 (d,  $J = 4.3$  Hz), 121.6 (d,  $J = 4.3$  Hz), 50.7, 49.0, 35.6, 35.4, 34.3, 33.4, 32.1, 31.3, 31.2, 30.8. HRMS ( $m/z$ , ESI-TOF): Calcd for  $\text{C}_{23}\text{H}_{23}\text{FN}_2\text{ONa}^+$  [ $\text{M}+\text{Na}^+$ ] 385.1687, found 385.1687.

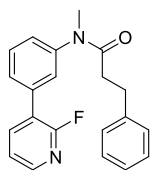

#### ***N*-(3-(2-fluoropyridin-3-yl)phenyl)-*N*-methyl-3-phenylpropanamide (1a<sub>13</sub>)**

The general procedure **I** was followed. Yield: 234 mg, (70 %).

$^1\text{H}$  NMR (400 MHz, Chloroform-*d*)  $\delta$  8.21 (s, 1H), 7.81 (t,  $J = 8.5$  Hz, 1H), 7.54 – 7.42 (m, 2H), 7.31 – 7.28 (m, 1H), 7.22 – 7.01 (m, 7H), 3.28 (s, 3H), 2.93 (t,  $J = 7.6$  Hz, 2H), 2.43 (t,  $J = 7.7$  Hz, 2H).  $^{13}\text{C}$  NMR (101 MHz, Chloroform-*d*)  $\delta$  172.1, 160.1 (d,  $J_{\text{C-F}} = 240.1$  Hz), 146.8 (d,  $J_{\text{C-F}} = 14.9$  Hz), 144.3, 141.0, 140.6 (d,  $J_{\text{C-F}} = 4.1$  Hz), 135.5, 130.1, 128.4, 128.3, 128.0, 127.7, 127.2, 126.0, 122.6 (d,  $J_{\text{C-F}} = 28.3$  Hz), 121.9 (d,  $J_{\text{C-F}} = 4.5$  Hz), 37.3, 35.9, 31.7. HRMS ( $m/z$ , ESI-TOF): Calcd for  $\text{C}_{21}\text{H}_{19}\text{FN}_2\text{ONa}^+$  [ $\text{M}+\text{Na}^+$ ] 357.1374, found 357.1373.

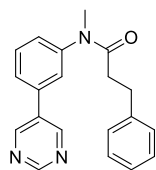

#### ***N*-methyl-3-phenyl-*N*-(3-(pyrimidin-5-yl)phenyl)propanamide (1a<sub>14</sub>)**

The general procedure **I** was followed. Yield: 160 mg, (50 %).

$^1\text{H}$  NMR (400 MHz, Chloroform-*d*)  $\delta$  9.18 (s, 1H), 8.84 (s, 2H), 7.48 (d,  $J = 4.7$  Hz, 2H), 7.16 – 7.01 (m, 7H), 3.26 (s, 3H), 2.89 (t,  $J = 7.5$  Hz, 2H), 2.37 (t,  $J = 7.5$  Hz, 2H).  $^{13}\text{C}$  NMR (101 MHz, Chloroform-*d*)  $\delta$  171.9, 157.8, 154.8, 145.0, 141.0, 136.0, 133.1, 130.8, 128.40, 128.3, 127.8, 126.2, 126.1, 125.8, 37.4, 35.9, 31.7. HRMS ( $m/z$ , ESI-TOF): Calcd for  $\text{C}_{20}\text{H}_{19}\text{N}_3\text{ONa}^+$  [ $\text{M}+\text{Na}^+$ ] 340.1420, found 340.1420.



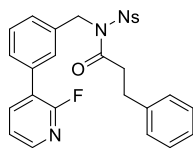

### ***N*-(3-(2-fluoropyridin-3-yl)benzyl)-*N*-((4-nitrophenyl)sulfonyl)-3-phenylpropanamide (1a15)**

The general procedure **II** was followed. Yield: 468 mg, (90 %).

$^1\text{H}$  NMR (400 MHz, Chloroform-*d*)  $\delta$  8.26 – 8.17 (m, 3H), 7.89 (d,  $J = 8.8$  Hz, 2H), 7.82 – 7.77 (m, 1H), 7.52 (d,  $J = 7.8$  Hz, 1H), 7.46 – 7.41 (m, 2H), 7.32 – 7.27 (m, 2H), 7.17 – 7.11 (m, 3H), 7.01 – 6.94 (m, 2H), 5.14 (s, 2H), 2.93 – 2.78 (m, 4H).  $^{13}\text{C}$  NMR (101 MHz, Chloroform-*d*)  $\delta$  172.4, 160.3 (d,  $J_{\text{C-F}} = 239.9$  Hz), 150.5, 146.8 (d,  $J_{\text{C-F}} = 14.9$  Hz), 144.8, 140.8 (d,  $J_{\text{C-F}} = 4.3$  Hz), 139.8, 136.5, 134.7 (d,  $J_{\text{C-F}} = 5.0$  Hz), 129.5, 128.7 (d,  $J = 3.0$  Hz), 128.6, 128.4, 127.9 (d,  $J_{\text{C-F}} = 3.1$  Hz), 127.6, 126.5, 124.2, 123.2 (d,  $J_{\text{C-F}} = 28.2$  Hz), 122.1 (d,  $J_{\text{C-F}} = 4.4$  Hz), 49.5, 38.1, 30.5. HRMS ( $m/z$ , ESI-TOF): Calcd for  $\text{C}_{27}\text{H}_{22}\text{FN}_3\text{O}_5\text{S Na}^+$  [ $\text{M}+\text{Na}^+$ ] 542.1156, found 542.1157.

## **2.2 Synthesis of Directing Template.**

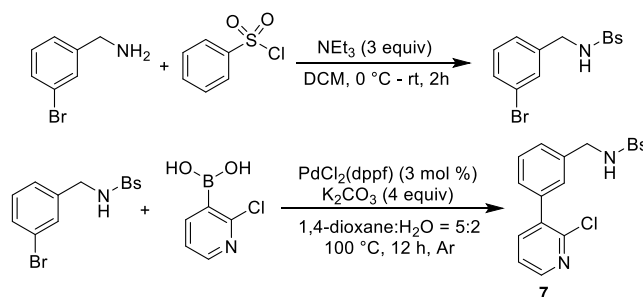

To a stirred solution of (3-bromophenyl)methanamine (10.0 mmol) in anhydrous DCM (20 mL) at , The mixture was cooled to 0 °C and benzenesulfonyl chloride (11.0 mmol) was added dropwise. The mixture was allowed to warm to room temperature and stirred for 2 h. The crude reaction mixture was diluted with EtOAc (40 mL) and filtered through a short pad of Celite. The filtrate was concentrated in vacuo and purified by flash silica gel chromatography using petroleum ether/EtOAc (5:1-3:1) as the eluent to give *N*-(3-bromobenzyl)benzenesulfonamide (99%).

To a solution of *N*-(3-bromobenzyl)benzenesulfonamide (5.0 mmol),  $\text{PdCl}_2(\text{dppf})$  (0.15 mmol), (2-chloropyridin-3-yl)boronic acid (5.5 mmol) and  $\text{K}_2\text{CO}_3$  (20.0 mmol) in 1,4-dioxane: $\text{H}_2\text{O}$  = 25 mL:10 mL under nitrogen atmosphere at 100 °C stirred for 12

h. Then the crude reaction mixture was extracted with EtOAc and water, the combined organic phase was dried over anhydrous Na<sub>2</sub>SO<sub>4</sub> and concentrated under reduced pressure. The residue was purified by flash silica gel chromatography using petroleum ether/EtOAc (3:1-2:1) as the eluent to give ***N*-(3-(2-chloropyridin-3-yl) - benzyl)benzenesulfonamide (7)** (70%). <sup>1</sup>H NMR (400 MHz, Chloroform-*d*) δ 8.33 (dd, *J* = 4.9, 1.9 Hz, 1H), 7.82 (d, *J* = 7.5 Hz, 2H), 7.56 – 7.47 (m, 2H), 7.44 – 7.41 (m, 2H), 7.32 – 7.29 (m, 2H), 7.25 – 7.18 (m, 3H), 5.37 (t, *J* = 6.3 Hz, 1H), 4.18 (d, *J* = 6.3 Hz, 2H). <sup>13</sup>C NMR (101 MHz, Chloroform-*d*) δ 149.5, 148.6, 140.0, 139.8, 137.9, 136.8, 136.5, 132.8, 129.2, 128.9, 128.8, 128.7, 127.9, 127.1, 122.7, 47.1. HRMS (*m/z*, ESI-TOF): Calcd for C<sub>18</sub>H<sub>15</sub>ClN<sub>2</sub>O<sub>2</sub>SNa<sup>+</sup> [*M*+Na<sup>+</sup>] 381.0435, found 381.0434.

## 2.3 Synthesis of Substrates.

### General Procedure i

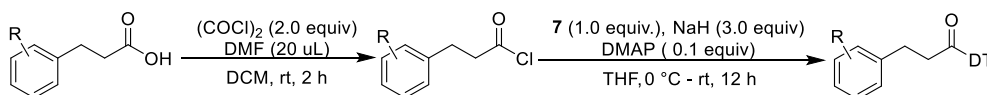

To a stirred solution of substituted phenylpropionic acid (1.2 mmol) in anhydrous DCM (5 mL) under nitrogen atmosphere was added DMF (20 uL). The mixture was cooled to 0 °C and oxalyl chloride (203 uL, 2.4 mmol) was added dropwise. The mixture was allowed to warm to room temperature and stirred for 2 h. Then volatile matter was removed under reduced pressure. The residue was re-dissolved with anhydrous THF (5 mL) and kept under N<sub>2</sub> atmosphere, which was used in following operation without further purification.

To a dry round bottom flask under N<sub>2</sub> atmosphere was charged with **7** (1.0 mmol), DMAP (0.1 mmol) and NaH (60% dispersion in mineral oil, 3 mmol). The bottom was placed into an ice bath for 10 minutes followed by addition of anhydrous THF (5 mL). After stirred for 0.5 h at 0 °C, the acyl chloride prepared above was added dropwise to the mixture. The reaction was allowed to warm to room temperature and stirred for 12 h. H<sub>2</sub>O was slowly added (be careful!!) to quench the reaction. Then the crude reaction mixture was extracted with EtOAc and water, the combined organic phase was dried over anhydrous Na<sub>2</sub>SO<sub>4</sub> and concentrated under reduced pressure. The residue was purified by flash silica gel chromatography using petroleum ether/EtOAc (5:1-3:1) as the eluent to give desired compound. (60 % - 95 %)

## General Procedure ii

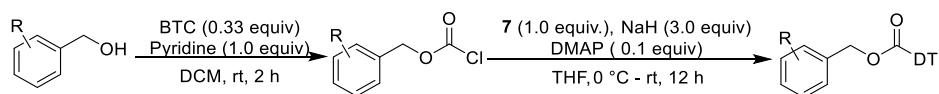

To a stirred solution of substituted benzyl alcohol (1.0 mmol) in anhydrous DCM (5 mL) under nitrogen atmosphere was added BTC (Triphosgene) (0.33 mmol). The mixture was cooled to 0 °C and pyridine (1.0 mmol) was added dropwise. The mixture was allowed to warm to room temperature and stirred for 2 h. Then volatile matter was removed under reduced pressure. The residue was re-dissolved with anhydrous THF (5 mL) and kept under N<sub>2</sub> atmosphere, which was used in following operation without further purification.

To a dry round bottom flask under N<sub>2</sub> atmosphere was charged with **7** (1.0 mmol), DMAP (0.1 mmol) and NaH (60% dispersion in mineral oil, 3 mmol). The bottom was placed into an ice bath for 10 minutes followed by addition of anhydrous THF (5 mL). After stirred for 0.5 h at 0 °C, the acyl chloride prepared above was added dropwise to the mixture. The reaction was allowed to warm to room temperature and stirred for 12 h. H<sub>2</sub>O was slowly added (be careful!!) to quench the reaction. Then the crude reaction mixture was extracted with EtOAc and water, the combined organic phase was dried over anhydrous Na<sub>2</sub>SO<sub>4</sub> and concentrated under reduced pressure. The residue was purified by flash silica gel chromatography using petroleum ether/EtOAc (5:1-3:1) as the eluent to give desired compound. (20 % - 70 %)

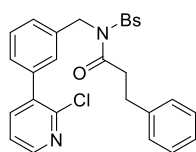

### *N*-(3-(2-chloropyridin-3-yl)benzyl)-3-phenyl-*N*-(phenylsulfonyl)propanamide

(**1a8**). The general procedure **i** was followed. Yield: 466 mg, (95 %).

<sup>1</sup>H NMR (400 MHz, Chloroform-*d*) δ 8.40 (dd, *J* = 4.8, 2.0 Hz, 1H), 7.74 – 7.66 (m, 2H), 7.62-7.57 (m, 2H), 7.45 (t, *J* = 7.9 Hz, 2H), 7.41-7.37 (m, 4H), 7.31 (dd, *J* = 7.6, 4.8 Hz, 1H), 7.20 – 7.09 (m, 3H), 7.03 – 6.94 (m, 2H), 5.13 (s, 2H), 2.97 – 2.90 (m, 2H), 2.88 – 2.84 (m, 2H). <sup>13</sup>C NMR (101 MHz, Chloroform-*d*) δ 172.5, 149.7, 148.6, 140.1, 139.8, 139.6, 137.9, 137.0, 136.6, 133.9, 129.3, 128.90, 128.88, 128.8, 128.6, 128.3, 128.1, 127.7, 126.3, 122.7, 49.2, 38.1, 30.7. HRMS (*m/z*, ESI-TOF): Calcd for C<sub>27</sub>H<sub>23</sub>ClN<sub>2</sub>O<sub>3</sub>SNa<sup>+</sup> [*M*+Na<sup>+</sup>] 513.1010, found 513.1011.

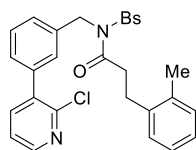

***N*-(3-(2-chloropyridin-3-yl)benzyl)-*N*-(phenylsulfonyl)-3-(*o*-tolyl)propanamide**

**(1b).** The general procedure **i** was followed. Yield: 403 mg, (80 %).

$^1\text{H}$  NMR (400 MHz, Chloroform-*d*)  $\delta$  8.39 (dd,  $J = 4.8, 2.0$  Hz, 1H), 7.77 – 7.71 (m, 2H), 7.64 – 7.56 (m, 2H), 7.50 – 7.38 (m, 6H), 7.30 (dd,  $J = 7.6, 4.8$  Hz, 1H), 7.06 (d,  $J = 4.4$  Hz, 2H), 7.02 – 6.98 (m, 1H), 6.89 (d,  $J = 7.4$  Hz, 1H), 5.17 (s, 2H), 2.87 (s, 4H), 2.13 (s, 3H).  $^{13}\text{C}$  NMR (101 MHz, Chloroform-*d*)  $\delta$  172.5, 149.5, 148.5, 139.7, 139.5, 138.1, 137.8, 136.9, 136.5, 135.9, 133.8, 130.3, 129.2, 128.8, 128.7, 128.7, 128.4, 127.9, 127.6, 126.4, 126.0, 122.6, 49.2, 36.6, 28.0, 19.1. HRMS ( $m/z$ , ESI-TOF): Calcd for  $\text{C}_{28}\text{H}_{25}\text{ClN}_2\text{O}_3\text{SNa}^+$  [ $\text{M}+\text{Na}^+$ ] 527.1167, found 527.1165.

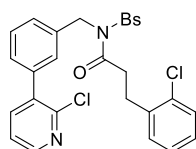

**3-(2-chlorophenyl)-*N*-(3-(2-chloropyridin-3-yl)benzyl)-*N* (phenylsulfonyl)-**

**propanamida (1c).** The general procedure **i** was followed. Yield: 471 mg, (90 %).

$^1\text{H}$  NMR (400 MHz, Chloroform-*d*)  $\delta$  8.38 (dd,  $J = 4.8, 1.9$  Hz, 1H), 7.75 – 7.68 (m, 2H), 7.62 – 7.54 (m, 2H), 7.47 – 7.35 (m, 6H), 7.29 (dd,  $J = 7.6, 4.8$  Hz, 1H), 7.22 (d,  $J = 7.4$  Hz, 1H), 7.09 – 7.03 (m, 3H), 5.15 (s, 2H), 3.02 – 2.88 (m, 4H).  $^{13}\text{C}$  NMR (101 MHz, Chloroform-*d*)  $\delta$  172.3, 149.6, 148.6, 139.8, 139.5, 137.9, 137.6, 136.9, 136.6, 133.9, 133.8, 130.7, 129.5, 129.3, 128.9, 128.8, 128.0, 127.94, 127.7, 126.9, 122.7, 49.3, 36.2, 28.7. HRMS ( $m/z$ , ESI-TOF): Calcd for  $\text{C}_{27}\text{H}_{22}\text{Cl}_2\text{N}_2\text{O}_3\text{SNa}^+$  [ $\text{M}+\text{Na}^+$ ] 547.0620, found 547.0621.

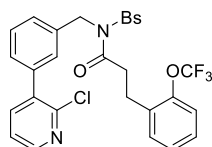

***N*-(3-(2-chloropyridin-3-yl)benzyl)-*N*-(phenylsulfonyl)-3-(2-(trifluoromethoxy) -**

**phenyl)propanamide (1d).** The general procedure **i** was followed. Yield: 430 mg, (75 %).

$^1\text{H}$  NMR (400 MHz, Chloroform-*d*)  $\delta$  8.40 (dd,  $J = 4.8, 1.9$  Hz, 1H), 7.73 – 7.68 (m, 2H), 7.62 – 7.57 (m, 2H), 7.46 (t,  $J = 7.8$  Hz, 2H), 7.41 – 7.38 (m, 4H), 7.31 (dd,  $J = 7.5, 4.8$  Hz, 1H), 7.20 – 7.10 (m, 2H), 7.08 (d,  $J = 4.1$  Hz, 2H), 5.15 (s, 2H), 2.92 (s, 4H).  $^{13}\text{C}$  NMR (101 MHz, Chloroform-*d*)  $\delta$  172.2, 149.7, 148.6, 147.6 (d,  $J_{\text{C-F}} = 1.6$  Hz), 139.8, 139.5, 137.9, 137.0, 136.6, 134.0, 132.5, 131.0, 129.4, 128.9, 128.9, 128.8, 128.1, 128.0, 127.6, 126.9, 122.7, 120.6 (q,  $J_{\text{C-F}} = 257.5$  Hz), 120.4 (d,  $J_{\text{C-F}} = 1.8$  Hz), 49.4, 36.6, 25.1. HRMS ( $m/z$ , ESI-TOF): Calcd for  $\text{C}_{28}\text{H}_{22}\text{ClF}_3\text{N}_2\text{O}_4\text{SNa}^+$  [ $\text{M}+\text{Na}^+$ ] 597.0833, found 597.0833.

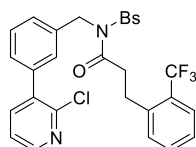

***N*-(3-(2-chloropyridin-3-yl)benzyl)-*N*-(phenylsulfonyl)-3-(2-(trifluoromethyl)phenyl)propanamide (1e<sub>1</sub>)**. The general procedure **i** was followed. Yield: 390 mg, (70 %).

$^1\text{H}$  NMR (400 MHz, Chloroform-*d*)  $\delta$  8.39 (dd,  $J = 4.8, 1.9$  Hz, 1H), 7.75 – 7.68 (m, 2H), 7.64 – 7.52 (m, 3H), 7.48 – 7.38 (m, 6H), 7.37 – 7.28 (m, 2H), 7.25 – 7.23 (m, 1H), 7.13 (d,  $J = 7.6$  Hz, 1H), 5.16 (s, 2H), 3.05 (t,  $J = 7.6$  Hz, 2H), 2.91 (t,  $J = 7.6$  Hz, 2H).  $^{13}\text{C}$  NMR (101 MHz, Chloroform-*d*)  $\delta$  172.1, 149.7, 148.6, 139.8, 139.5, 138.9 (d,  $J_{\text{C-F}} = 1.8$  Hz), 137.9, 136.9, 136.6, 134.0, 132.0, 131.2, 129.3, 128.92, 128.86, 128.8, 128.5 (d,  $J_{\text{C-F}} = 29.9$  Hz), 128.1, 127.7, 126.6, 126.2 (q,  $J_{\text{C-F}} = 5.8$  Hz), 124.5 (q,  $J_{\text{C-F}} = 273.8$  Hz), 122.7, 49.4, 38.2, 27.6 (d,  $J_{\text{C-F}} = 2.0$  Hz). HRMS ( $m/z$ , ESI-TOF): Calcd for  $\text{C}_{28}\text{H}_{22}\text{ClF}_3\text{N}_2\text{O}_3\text{SNa}^+$  [ $\text{M}+\text{Na}^+$ ] 581.0884, found 581.0884.

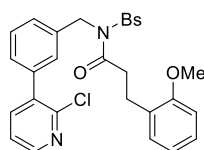

***N*-(3-(2-chloropyridin-3-yl)benzyl)-3-(2-methoxyphenyl)-*N*-(phenylsulfonyl)propanamide (1e<sub>2</sub>)**. The general procedure **i** was followed. Yield: 416 mg, (80 %).

$^1\text{H}$  NMR (400 MHz, Chloroform-*d*)  $\delta$  8.36 (dd,  $J = 4.8, 1.9$  Hz, 1H), 7.75 (d,  $J = 7.2$  Hz, 2H), 7.61 – 7.53 (m, 2H), 7.46 – 7.36 (m, 6H), 7.28 (dd,  $J = 7.6, 4.9$  Hz, 1H), 7.12 (td,  $J = 7.8, 1.8$  Hz, 1H), 6.96 (dd,  $J = 7.4, 1.7$  Hz, 1H), 6.79 – 6.71 (m, 2H), 5.15 (s, 2H), 3.63 (s, 3H), 2.95 – 2.81 (m, 4H).  $^{13}\text{C}$  NMR (101 MHz, Chloroform-*d*)  $\delta$  172.8,

157.2, 148.4, 139.6, 139.4, 137.6, 136.9, 133.6, 129.9, 128.9, 128.59, 128.56, 128.4, 128.0, 127.63, 127.59, 127.57, 122.6, 120.3, 110.0, 54.9, 49.1, 36.0, 25.8. HRMS (m/z, ESI-TOF): Calcd for C<sub>28</sub>H<sub>25</sub>ClN<sub>2</sub>O<sub>4</sub>SNa<sup>+</sup> [M+Na<sup>+</sup>] 543.1116, found 543.1114.

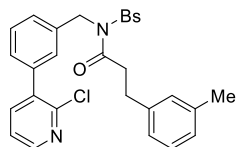

***N*-(3-(2-chloropyridin-3-yl)benzyl)-*N*-(phenylsulfonyl)-3-(*m*-tolyl)propanamide**

**(1f).** The general procedure **i** was followed. Yield: 403 mg, (80 %).

<sup>1</sup>H NMR (400 MHz, Chloroform-*d*) δ 8.39 (dd, *J* = 4.8, 2.0 Hz, 1H), 7.76 – 7.69 (m, 2H), 7.64 – 7.56 (m, 2H), 7.45 (t, *J* = 7.9 Hz, 2H), 7.41 – 7.37 (m, 4H), 7.30 (dd, *J* = 7.5, 4.8 Hz, 1H), 7.06 (t, *J* = 7.5 Hz, 1H), 6.95 (d, *J* = 7.6 Hz, 1H), 6.82 (s, 1H), 6.79 (d, *J* = 7.5 Hz, 1H), 5.15 (s, 2H), 2.97 – 2.88 (m, 2H), 2.88 – 2.79 (m, 2H), 2.25 (s, 3H). <sup>13</sup>C NMR (101 MHz, Chloroform-*d*) δ 172.5, 149.6, 148.6, 140.0, 139.7, 139.6, 138.0, 137.8, 137.0, 133.8, 129.2, 129.1, 128.82, 128.78, 128.76, 128.4, 128.0, 127.7, 127.0, 125.2, 122.7, 49.2, 38.1, 30.5, 21.4. HRMS (m/z, ESI-TOF): Calcd for C<sub>28</sub>H<sub>25</sub>ClN<sub>2</sub>O<sub>3</sub>SNa<sup>+</sup> [M+Na<sup>+</sup>] 527.1167, found 527.1164.

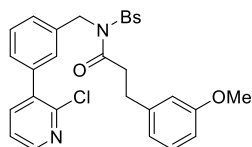

***N*-(3-(2-chloropyridin-3-yl)benzyl)-3-(3-methoxyphenyl)-*N*-(phenylsulfonyl)propanamide (1g).** The general procedure **i** was followed. Yield: 443 mg, (85 %).

<sup>1</sup>H NMR (400 MHz, Chloroform-*d*) δ 8.38 (dd, *J* = 4.8, 2.0 Hz, 1H), 7.75 – 7.69 (m, 2H), 7.62 – 7.54 (m, 2H), 7.44 (t, *J* = 7.9 Hz, 2H), 7.40 – 7.38 (m, 4H), 7.29 (dd, *J* = 7.6, 4.7 Hz, 1H), 7.07 (t, *J* = 8.1 Hz, 1H), 6.71 – 6.65 (m, 1H), 6.60 – 6.54 (m, 2H), 5.14 (s, 2H), 3.71 (s, 3H), 2.94 – 2.90 (m, 2H), 2.86 – 2.82 (m, 2H). <sup>13</sup>C NMR (101 MHz, Chloroform-*d*) δ 172.4, 159.6, 149.5, 148.5, 141.7, 139.7, 139.5, 137.8, 136.9, 136.5, 133.8, 129.4, 129.2, 128.8, 128.71, 128.70, 127.9, 127.6, 122.6, 120.5, 114.0, 111.6, 55.1, 49.2, 37.9, 30.6. HRMS (m/z, ESI-TOF): Calcd for C<sub>28</sub>H<sub>25</sub>ClN<sub>2</sub>O<sub>4</sub>SNa<sup>+</sup> [M+Na<sup>+</sup>] 543.1116, found 543.1114.

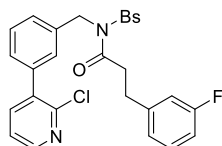

***N*-(3-(2-chloropyridin-3-yl)benzyl)-3-(3-fluorophenyl)-*N*-(phenylsulfonyl)propanamide (1h).** The general procedure **i** was followed. Yield: 460 mg, (91 %).

$^1\text{H}$  NMR (400 MHz, Chloroform-*d*)  $\delta$  8.40 (dd,  $J = 4.8, 1.9$  Hz, 1H), 7.71 – 7.65 (m, 2H), 7.60 (td,  $J = 7.6, 1.6$  Hz, 2H), 7.46 (t,  $J = 7.9$  Hz, 2H), 7.42 – 7.37 (m, 4H), 7.31 (dd,  $J = 7.5, 4.8$  Hz, 1H), 7.10 (td,  $J = 7.9, 6.0$  Hz, 1H), 6.81 (td,  $J = 8.5, 2.6$  Hz, 1H), 6.76 (dd,  $J = 7.5, 1.5$  Hz, 1H), 6.64 (dt,  $J = 9.9, 2.1$  Hz, 1H), 5.14 (s, 2H), 2.96 – 2.89 (m, 2H), 2.88 – 2.84 (m, 2H).  $^{13}\text{C}$  NMR (101 MHz, Chloroform-*d*)  $\delta$  172.2, 162.9 (d,  $J_{\text{C-F}} = 246$  Hz), 149.7, 148.7, 142.7 (d,  $J_{\text{C-F}} = 7$  Hz), 139.8, 139.6, 138.0, 137.0, 136.7, 134.0, 123.0 (d,  $J_{\text{C-F}} = 8$  Hz), 129.4, 129.02, 129.00, 128.9, 128.2, 127.7, 124.1 (d,  $J_{\text{C-F}} = 3$  Hz), 122.7, 115.2 (d,  $J_{\text{C-F}} = 21$  Hz), 113.3 (d,  $J_{\text{C-F}} = 21$  Hz), 49.3, 37.9, 30.4 (d,  $J_{\text{C-F}} = 1.8$  Hz). HRMS ( $m/z$ , ESI-TOF): Calcd for  $\text{C}_{27}\text{H}_{22}\text{ClFN}_2\text{O}_3\text{SNa}^+$  [ $\text{M}+\text{Na}^+$ ] 531.0916, found 531.0916.

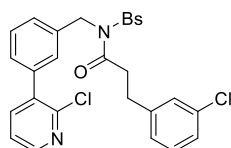

**3-(3-chlorophenyl)-*N*-(3-(2-chloropyridin-3-yl)benzyl)-*N*-(phenylsulfonyl)propanamide (1i).** The general procedure **i** was followed. Yield: 315 mg, (60 %).

$^1\text{H}$  NMR (400 MHz, Chloroform-*d*)  $\delta$  8.40 (dd,  $J = 4.8, 1.9$  Hz, 1H), 7.71 – 7.65 (m, 2H), 7.64 – 7.58 (m, 2H), 7.46 (t,  $J = 7.8$  Hz, 2H), 7.43 – 7.35 (m, 4H), 7.31 (dd,  $J = 7.6, 4.8$  Hz, 1H), 7.12 – 7.04 (m, 2H), 6.94 (s, 1H), 6.87 (dt,  $J = 6.8, 1.9$  Hz, 1H), 5.14 (s, 2H), 2.94 – 2.90 (m, 2H), 2.86 – 2.82 (m, 2H).  $^{13}\text{C}$  NMR (101 MHz, Chloroform-*d*)  $\delta$  172.1, 149.7, 148.7, 142.3, 139.8, 139.6, 137.9, 137.0, 136.7, 134.2, 134.1, 129.8, 129.4, 129.01, 129.00, 128.9, 128.5, 128.2, 127.6, 126.7, 126.6, 122.7, 49.3, 37.9, 30.3. HRMS ( $m/z$ , ESI-TOF): Calcd for  $\text{C}_{27}\text{H}_{22}\text{Cl}_2\text{N}_2\text{O}_3\text{SNa}^+$  [ $\text{M}+\text{Na}^+$ ] 547.0620, found 547.0620.

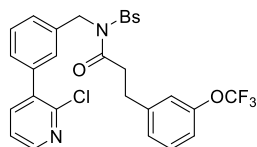

***N*-(3-(2-chloropyridin-3-yl)benzyl)-*N*-(phenylsulfonyl)-3-(3-(trifluoromethoxy)phenyl)propanamide.**

**phenyl)propanamide (1j).** The general procedure **i** was followed. Yield: 460 mg, (80 %).

<sup>1</sup>H NMR (400 MHz, Chloroform-*d*) δ 8.40 (dd, *J* = 4.8, 1.9 Hz, 1H), 7.71 – 7.66 (m, 2H), 7.65 – 7.56 (m, 2H), 7.46 (t, *J* = 7.9 Hz, 2H), 7.42 – 7.37 (m, 4H), 7.31 (dd, *J* = 7.5, 4.8 Hz, 1H), 7.18 (t, *J* = 7.9 Hz, 1H), 6.99 (d, *J* = 8.2 Hz, 1H), 6.92 (d, *J* = 7.6 Hz, 1H), 6.82 (s, 1H), 5.15 (s, 2H), 3.03 – 2.79 (m, 4H). <sup>13</sup>C NMR (101 MHz, Chloroform-*d*) δ 172.1, 149.7, 149.4, 148.7, 142.6, 139.8, 139.6, 138.0, 137.0, 136.6, 134.1, 129.9, 129.4, 129.1, 129.0, 128.9, 128.2, 127.6, 126.9, 122.7, 120.9, 120.5 (d, *J*<sub>C-F</sub> = 256.8 Hz), 118.8, 49.3, 37.8, 30.3. HRMS (m/z, ESI-TOF): Calcd for C<sub>28</sub>H<sub>22</sub>ClF<sub>3</sub>N<sub>2</sub>O<sub>4</sub>SNa<sup>+</sup> [M+Na<sup>+</sup>] 597.0833, found 597.0834.

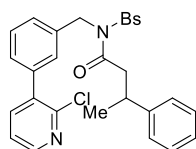

***N*-(3-(2-chloropyridin-3-yl)benzyl)-3-phenyl-*N*-(phenylsulfonyl)butanamide (1k).**

The general procedure **i** was followed. Yield: 428 mg, (85 %).

<sup>1</sup>H NMR (400 MHz, Chloroform-*d*) δ 8.40 (dd, *J* = 4.8, 2.0 Hz, 1H), 7.69 – 7.63 (m, 2H), 7.63 – 7.56 (m, 2H), 7.46 (t, *J* = 7.9 Hz, 2H), 7.40 – 7.35 (m, 2H), 7.34 – 7.27 (m, 3H), 7.16 – 7.05 (m, 3H), 6.94 (d, *J* = 6.9 Hz, 2H), 5.16 – 5.02 (m, 2H), 3.32 (h, *J* = 7.0 Hz, 1H), 2.96 (dd, *J* = 16.6, 7.3 Hz, 1H), 2.83 (dd, *J* = 16.6, 7.0 Hz, 1H), 1.12 (d, *J* = 7.0 Hz, 3H). <sup>13</sup>C NMR (101 MHz, Chloroform-*d*) δ 172.0, 149.7, 148.6, 145.4, 139.80, 139.77, 137.9, 137.1, 136.7, 133.9, 129.3, 128.91, 128.87, 128.8, 128.5, 128.2, 127.7, 126.7, 126.4, 122.7, 49.0, 44.7, 36.1, 21.8. HRMS (m/z, ESI-TOF): Calcd for C<sub>28</sub>H<sub>25</sub>ClN<sub>2</sub>O<sub>3</sub>SNa<sup>+</sup> [M+Na<sup>+</sup>] 527.1167, found 527.1168.

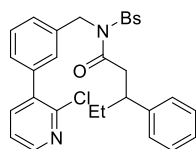

***N*-(3-(2-chloropyridin-3-yl)benzyl)-3-phenyl-*N*-(phenylsulfonyl)pentanamide (1l).**

The general procedure **i** was followed. Yield: 440 mg, (85 %).

<sup>1</sup>H NMR (400 MHz, Chloroform-*d*) δ 8.41 (dd, *J* = 4.8, 2.0 Hz, 1H), 7.65 – 7.55 (m, 4H), 7.49 – 7.43 (m, 2H), 7.40 – 7.33 (m, 2H), 7.31 (dd, *J* = 7.5, 4.7 Hz, 1H), 7.27 – 7.26 (m, 1H), 7.22 (dt, *J* = 7.1, 1.8 Hz, 1H), 7.13 – 7.01 (m, 3H), 6.90 – 6.83 (m, 2H), 5.20 – 4.95 (m, 2H), 3.11 – 2.82 (m, 3H), 1.60 – 1.49 (m, 1H), 1.46 – 1.35 (m, 1H),



0.67 (t,  $J = 7.3$  Hz, 3H).  $^{13}\text{C}$  NMR (101 MHz, Chloroform-*d*)  $\delta$  172.1, 149.7, 148.6, 143.7, 139.84, 139.83, 137.9, 137.2, 136.7, 133.8, 129.3, 128.92, 128.88, 128.8, 128.4, 128.2, 127.7, 127.5, 126.4, 122.7, 48.9, 43.5, 43.3, 29.0, 12.0. HRMS ( $m/z$ , ESI-TOF): Calcd for  $\text{C}_{29}\text{H}_{27}\text{ClN}_2\text{O}_3\text{SNa}^+$  [ $\text{M}+\text{Na}^+$ ] 541.1323, found 541.1323.

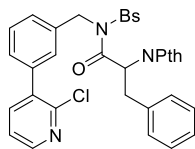

***N*-(3-(2-chloropyridin-3-yl)benzyl)-2-(1,3-dioxoisindolin-2-yl)-3-phenyl-*N*-(phenylsulfonyl)propanamide (1m).** The general procedure **i** was followed. Yield: 381 mg, (60 %).

$^1\text{H}$  NMR (400 MHz, Chloroform-*d*)  $\delta$  8.31 (dd,  $J = 4.8, 2.0$  Hz, 1H), 7.91 (dd,  $J = 7.4, 1.8$  Hz, 2H), 7.63 – 7.49 (m, 6H), 7.43 (t,  $J = 7.6$  Hz, 2H), 7.27 – 7.17 (m, 5H), 7.14 – 7.09 (m, 2H), 7.08 – 6.99 (m, 3H), 5.90 (dd,  $J = 10.9, 4.8$  Hz, 1H), 4.89 (q,  $J = 16.0$  Hz, 2H), 3.63 (dd,  $J = 13.9, 10.9$  Hz, 1H), 3.48 (dd,  $J = 13.9, 4.8$  Hz, 1H).  $^{13}\text{C}$  NMR (101 MHz, Chloroform-*d*)  $\delta$  170.1, 167.8, 149.6, 148.6, 139.8, 138.6, 137.6, 136.5, 136.4, 136.0, 134.19, 134.15, 131.4, 129.4, 129.1, 128.8, 128.61, 128.59, 128.4, 128.1, 127.5, 127.0, 123.4, 122.7, 56.6, 50.0, 34.9. HRMS ( $m/z$ , ESI-TOF): Calcd for  $\text{C}_{35}\text{H}_{26}\text{ClN}_3\text{O}_5\text{SNa}^+$  [ $\text{M}+\text{Na}^+$ ] 658.1174, found 658.1174.

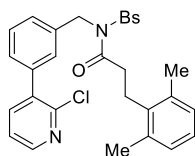

***N*-(3-(2-chloropyridin-3-yl)benzyl)-3-(2,6-dimethylphenyl)-*N*-(phenylsulfonyl)propanamide (1n).** The general procedure **i** was followed. Yield: 466 mg, (90 %).

$^1\text{H}$  NMR (400 MHz, Chloroform-*d*)  $\delta$  8.40 (dd,  $J = 4.9, 1.9$  Hz, 1H), 7.79 – 7.72 (m, 2H), 7.66 – 7.58 (m, 2H), 7.50 – 7.41 (m, 6H), 7.32 (dd,  $J = 7.6, 4.7$  Hz, 1H), 7.03 – 6.90 (m, 3H), 5.18 (s, 2H), 2.91 – 2.84 (m, 2H), 2.73 – 2.64 (m, 2H), 2.10 (s, 6H).  $^{13}\text{C}$  NMR (101 MHz, Chloroform-*d*)  $\delta$  172.9, 149.7, 148.7, 139.8, 139.6, 138.0, 137.0, 136.8, 136.6, 136.3, 134.0, 129.4, 128.97, 128.95, 128.7, 128.4, 127.9, 127.8, 126.4, 122.7, 49.5, 35.5, 24.9, 19.7. HRMS ( $m/z$ , ESI-TOF): Calcd for  $\text{C}_{29}\text{H}_{27}\text{ClN}_2\text{O}_3\text{SNa}^+$  [ $\text{M}+\text{Na}^+$ ] 541.1323, found 541.1322.

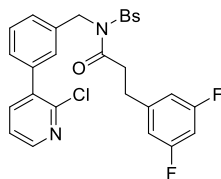

***N*-(3-(2-chloropyridin-3-yl)benzyl)-3-(3,5-difluorophenyl)-*N*-(phenylsulfonyl)propanamide (1o).** The general procedure **i** was followed. Yield: 447 mg, (85 %).

$^1\text{H}$  NMR (400 MHz, Chloroform-*d*)  $\delta$  8.39 (dd,  $J = 4.8, 2.0$  Hz, 1H), 7.71 – 7.64 (m, 2H), 7.64 – 7.57 (m, 2H), 7.46 (t,  $J = 7.8$  Hz, 2H), 7.41 – 7.36 (m, 4H), 7.30 (dd,  $J = 7.5, 4.8$  Hz, 1H), 6.54 (tt,  $J = 9.0, 2.4$  Hz, 1H), 6.46 (h,  $J = 4.3$  Hz, 2H), 5.15 (s, 2H), 2.93 – 2.89 (m, 2H), 2.85 – 2.82 (m, 2H).  $^{13}\text{C}$  NMR (101 MHz, Chloroform-*d*)  $\delta$  171.8, 162.9 (dd,  $J_{\text{C-F}} = 248.3, 12.9$  Hz), 149.6, 148.6, 144.0 (t,  $J_{\text{C-F}} = 9.1$  Hz), 139.8, 139.5, 137.9, 136.9, 136.5, 134.1, 129.4, 129.0, 128.8, 128.2, 127.5, 122.7, 111.2 (dd,  $J_{\text{C-F}} = 24.7, 11.5$  Hz), 101.8 (t,  $J_{\text{C-F}} = 25.2$  Hz), 49.2, 37.4, 30.2. HRMS ( $m/z$ , ESI-TOF): Calcd for  $\text{C}_{27}\text{H}_{21}\text{ClF}_2\text{N}_2\text{O}_3\text{SNa}^+$  [ $\text{M}+\text{Na}^+$ ] 549.0822, found 549.0819.

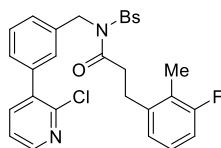

***N*-(3-(2-chloropyridin-3-yl)benzyl)-3-(3-fluoro-2-methylphenyl)-*N*-(phenylsulfonyl)propanamide (1p).** The general procedure **i** was followed. Yield: 418 mg, (80 %).

$^1\text{H}$  NMR (400 MHz, Chloroform-*d*)  $\delta$  8.41 (dd,  $J = 4.8, 1.9$  Hz, 1H), 7.73 – 7.65 (m, 2H), 7.64 – 7.57 (m, 2H), 7.51 – 7.38 (m, 6H), 7.32 (dd,  $J = 7.5, 4.8$  Hz, 1H), 6.93 (td,  $J = 7.9, 5.8$  Hz, 1H), 6.85 – 6.78 (m, 1H), 6.68 (d,  $J = 7.6$  Hz, 1H), 5.16 (s, 2H), 2.89 – 2.81 (m, 4H), 2.00 (d,  $J = 2.1$  Hz, 3H).  $^{13}\text{C}$  NMR (101 MHz, Chloroform-*d*)  $\delta$  172.4, 161.4 (d,  $J_{\text{C-F}} = 243.5$  Hz), 149.7, 148.7, 140.8 (d,  $J_{\text{C-F}} = 4.1$  Hz), 139.8, 139.6, 138.0, 137.0, 136.6, 134.0, 129.4, 129.00, 128.98, 128.9, 128.2, 127.6, 126.7 (d,  $J_{\text{C-F}} = 9.1$  Hz), 124.2 (d,  $J_{\text{C-F}} = 3.1$  Hz), 123.2 (d,  $J_{\text{C-F}} = 16.0$  Hz), 122.7, 113.2 (d,  $J_{\text{C-F}} = 23.3$  Hz), 49.4, 36.8, 27.9 (d,  $J_{\text{C-F}} = 2.8$  Hz), 10.3 (d,  $J_{\text{C-F}} = 5.8$  Hz). HRMS ( $m/z$ , ESI-TOF): Calcd for  $\text{C}_{28}\text{H}_{24}\text{ClFN}_2\text{O}_3\text{SNa}^+$  [ $\text{M}+\text{Na}^+$ ] 545.1072, found 545.1071.

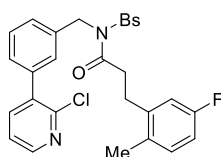

***N*-(3-(2-chloropyridin-3-yl)benzyl)-3-(5-fluoro-2-methylphenyl)-*N*-(phenylsulfonyl)propanamide (1q).** The general procedure **i** was followed. Yield: 444 mg, (85 %).

<sup>1</sup>H NMR (400 MHz, Chloroform-*d*) δ 8.40 (dd, *J* = 4.8, 1.9 Hz, 1H), 7.74 – 7.69 (m, 2H), 7.65 – 7.57 (m, 2H), 7.47 (t, *J* = 7.8 Hz, 2H), 7.44 – 7.39 (m, 4H), 7.31 (dd, *J* = 7.6, 4.8 Hz, 1H), 6.99 (dd, *J* = 8.4, 5.9 Hz, 1H), 6.74 (td, *J* = 8.4, 2.8 Hz, 1H), 6.56 (dd, *J* = 9.8, 2.8 Hz, 1H), 5.17 (s, 2H), 2.92 – 2.75 (m, 4H), 2.09 (s, 3H). <sup>13</sup>C NMR (101 MHz, Chloroform-*d*) δ 172.3, 161.2 (d, *J*<sub>C-F</sub> = 243.5 Hz), 149.7, 148.6, 140.3 (d, *J*<sub>C-F</sub> = 7.0 Hz), 139.8, 139.6, 138.0, 137.0, 136.6, 134.0, 131.55 (d, *J*<sub>C-F</sub> = 2.8 Hz), 131.51 (d, *J*<sub>C-F</sub> = 7.6 Hz), 129.4, 129.01, 128.97, 128.9, 128.2, 127.6, 122.7, 115.1 (d, *J*<sub>C-F</sub> = 21.1 Hz), 113.0 (d, *J*<sub>C-F</sub> = 20.5 Hz), 49.4, 36.5, 28.0 (d, *J*<sub>C-F</sub> = 1.6 Hz), 18.5. HRMS (*m/z*, ESI-TOF): Calcd for C<sub>28</sub>H<sub>24</sub>ClFN<sub>2</sub>O<sub>3</sub>SNa<sup>+</sup> [*M*+Na<sup>+</sup>] 545.1072, found 545.1071.

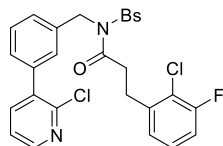

***N*-(3-(2-chloro-3-fluorophenyl)-*N*-(3-(2-chloropyridin-3-yl)benzyl)-*N*-(phenylsulfonyl)propanamide (1r).** The general procedure **i** was followed. Yield: 434 mg, (80 %).

<sup>1</sup>H NMR (400 MHz, Chloroform-*d*) δ 8.39 (dd, *J* = 4.7, 1.9 Hz, 1H), 7.71 – 7.66 (m, 2H), 7.65 – 7.55 (m, 2H), 7.48 – 7.36 (m, 6H), 7.31 (dd, *J* = 7.5, 4.8 Hz, 1H), 7.00 (td, *J* = 7.9, 5.4 Hz, 1H), 6.93 (td, *J* = 8.5, 1.6 Hz, 1H), 6.86 (d, *J* = 7.5 Hz, 1H), 5.16 (s, 2H), 3.02 – 3.00 (m, 2H), 2.96 – 2.90 (m, 2H). <sup>13</sup>C NMR (101 MHz, Chloroform-*d*) δ 172.0, 158.3 (d, *J*<sub>C-F</sub> = 247.9 Hz), 149.7, 148.6, 140.2, 139.8, 139.5, 137.9, 136.9, 136.6, 134.0, 129.4, 128.9, 128.82, 128.15, 127.6, 127.5, 127.4, 125.7 (d, *J*<sub>C-F</sub> = 3.3 Hz), 122.7, 120.8 (d, *J*<sub>C-F</sub> = 17.3 Hz), 114.6 (d, *J*<sub>C-F</sub> = 21.4 Hz), 49.3, 36.0, 28.4 (d, *J*<sub>C-F</sub> = 2.6 Hz). HRMS (*m/z*, ESI-TOF): Calcd for C<sub>27</sub>H<sub>21</sub>Cl<sub>2</sub>FN<sub>2</sub>O<sub>3</sub>SNa<sup>+</sup> [*M*+Na<sup>+</sup>] 565.0526, found 565.0524.

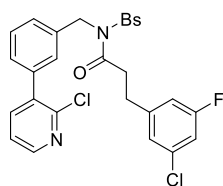

***N*-(3-(3-chloro-5-fluorophenyl)-*N*-(3-(2-chloropyridin-3-yl)benzyl)-*N*-(phenylsulfonyl)propanamide (1s).**

**(phenylsulfonyl)-propanamide (1s).** The general procedure **i** was followed. Yield: 325 mg, (60 %).

<sup>1</sup>H NMR (400 MHz, Chloroform-*d*) δ 8.39 (dd, *J* = 4.8, 1.9 Hz, 1H), 7.70 – 7.65 (m, 2H), 7.61 (td, *J* = 7.0, 6.2, 1.6 Hz, 2H), 7.46 (t, *J* = 7.8 Hz, 2H), 7.2 – 7.36 (m, 4H), 7.31 (dd, *J* = 7.6, 4.8 Hz, 1H), 6.84 (dt, *J* = 8.5, 2.1 Hz, 1H), 6.75 (s, 1H), 6.56 (d, *J* = 9.3 Hz, 1H), 5.15 (s, 2H), 2.91 (t, *J* = 7.3 Hz, 2H), 2.83 (t, *J* = 6.7 Hz, 2H). <sup>13</sup>C NMR (101 MHz, Chloroform-*d*) δ 171.8, 162.6 (d, *J*<sub>C-F</sub> = 249.4 Hz), 149.7, 148.6, 143.9 (d, *J*<sub>C-F</sub> = 8.2 Hz), 139.8, 139.5, 137.9, 136.8, 136.6, 134.8 (d, *J*<sub>C-F</sub> = 10.9 Hz), 134.1, 129.4, 129.04, 129.01, 128.9, 128.2, 127.5, 124.4 (d, *J*<sub>C-F</sub> = 3.1 Hz), 122.7, 114.2 (d, *J*<sub>C-F</sub> = 24.8 Hz), 113.9 (d, *J*<sub>C-F</sub> = 21.2 Hz), 49.3, 37.5, 30.1 (d, *J*<sub>C-F</sub> = 1.8 Hz). HRMS (m/z, ESI-TOF): Calcd for C<sub>27</sub>H<sub>21</sub>Cl<sub>2</sub>FN<sub>2</sub>O<sub>3</sub>SNa<sup>+</sup> [M+Na<sup>+</sup>] 565.0526, found 565.0529.

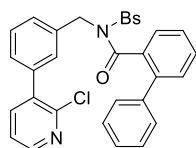

**N-(3-(2-chloropyridin-3-yl)benzyl)-N-(phenylsulfonyl)-[1,1'-biphenyl]-2-carboxamide (5a).** The general procedure **i** was followed. Yield: 350 mg, (65 %).

<sup>1</sup>H NMR (400 MHz, Chloroform-*d*) δ 8.43 – 8.41 (m, 1H), 7.70 (d, *J* = 7.9 Hz, 2H), 7.62 (t, *J* = 7.5 Hz, 1H), 7.54 – 7.50 (m, 1H), 7.48 – 7.41 (m, 3H), 7.40 – 7.21 (m, 10H), 7.16 (d, *J* = 7.7 Hz, 1H), 7.02 (d, *J* = 7.5 Hz, 1H), 6.97 (s, 1H), 4.62 (br, 2H). <sup>13</sup>C NMR (101 MHz, Chloroform-*d*) δ 171.1, 149.6, 148.6, 139.7, 139.0, 138.9, 138.8, 137.7, 136.7, 136.5, 134.0, 133.7, 130.7, 129.9, 129.1, 128.9, 128.84, 128.75, 128.7, 128.6, 128.5, 128.4, 128.1, 127.7, 127.4, 122.7, 50.5. HRMS (m/z, ESI-TOF): Calcd for C<sub>31</sub>H<sub>23</sub>ClN<sub>2</sub>O<sub>3</sub>SNa<sup>+</sup> [M+Na<sup>+</sup>] 561.1010, found 561.1010.

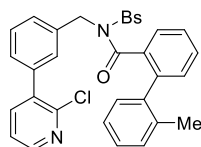

**N-(3-(2-chloropyridin-3-yl)benzyl)-2'-methyl-N-(phenylsulfonyl)-[1,1'-biphenyl]-2-carboxamide (5b).** The general procedure **i** was followed. Yield: 386 mg, (70 %).

<sup>1</sup>H NMR (400 MHz, Chloroform-*d*) δ 8.42 (dd, *J* = 4.8, 1.9 Hz, 1H), 7.65 – 7.53 (m, 4H), 7.45 (td, *J* = 7.5, 1.5 Hz, 1H), 7.40 (t, *J* = 7.9 Hz, 2H), 7.36 – 7.27 (m, 4H), 7.26 – 7.21 (m, 3H), 7.16 (d, *J* = 7.6 Hz, 1H), 7.12 – 7.06 (m, 4H), 4.73 (br, 2H), 2.07 (br, 3H). <sup>13</sup>C NMR (101 MHz, Chloroform-*d*) δ 170.7, 149.6, 148.6, 139.8, 138.79, 138.78,

138.3, 137.7, 136.7, 136.5, 134.9, 133.6, 130.7, 130.6, 130.2, 128.80, 128.75, 128.7, 128.4, 128.20, 128.17, 127.9, 127.6, 127.3, 125.6, 122.7, 50.8, 20.1. HRMS (m/z, ESI-TOF): Calcd for C<sub>32</sub>H<sub>25</sub>ClN<sub>2</sub>O<sub>3</sub>SNa<sup>+</sup> [M+Na<sup>+</sup>] 575.1166, found 575.1167.

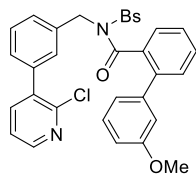

**N-(3-(2-chloropyridin-3-yl)benzyl)-3'-methoxy-N-(phenylsulfonyl)-[1,1'-biphenyl]-2-carboxamide (5c).** The general procedure **i** was followed. Yield: 370 mg, (65 %).

<sup>1</sup>H NMR (400 MHz, Chloroform-*d*) δ 8.39 (dd, *J* = 4.8, 1.9 Hz, 1H), 7.66 (d, *J* = 7.1 Hz, 2H), 7.57 (t, *J* = 7.5 Hz, 1H), 7.50 (dd, *J* = 7.5, 2.0 Hz, 1H), 7.45 – 7.34 (m, 4H), 7.33 – 7.26 (m, 3H), 7.24 – 7.14 (m, 2H), 7.11 (dd, *J* = 7.7, 1.4 Hz, 1H), 6.99 (d, *J* = 7.2 Hz, 1H), 6.96 (s, 1H), 6.92 – 6.83 (m, 3H), 4.65 (br, 2H), 3.71 (s, 3H). <sup>13</sup>C NMR (101 MHz, Chloroform-*d*) δ 171.1, 159.6, 149.6, 148.6, 140.3, 139.7, 139.0, 138.9, 137.6, 136.7, 136.5, 134.0, 133.7, 130.6, 129.94, 129.86, 128.85, 128.72, 128.70, 128.5, 128.39, 128.36, 127.6, 127.5, 122.7, 121.1, 114.4, 114.0, 55.3, 50.6. HRMS (m/z, ESI-TOF): Calcd for C<sub>32</sub>H<sub>25</sub>ClN<sub>2</sub>O<sub>4</sub>SNa<sup>+</sup> [M+Na<sup>+</sup>] 591.1116, found 591.1113.

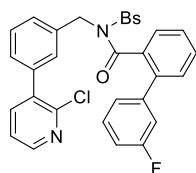

**N-(3-(2-chloropyridin-3-yl)benzyl)-3'-fluoro-N-(phenylsulfonyl)-[1,1'-biphenyl]-2-carboxamide (5d).** The general procedure **i** was followed. Yield: 333 mg, (60 %).

<sup>1</sup>H NMR (400 MHz, Chloroform-*d*) δ 8.40 (dd, *J* = 4.8, 1.9 Hz, 1H), 7.66 (d, *J* = 7.4 Hz, 2H), 7.59 (t, *J* = 7.5 Hz, 1H), 7.51 (dd, *J* = 7.5, 1.9 Hz, 1H), 7.46 – 7.40 (m, 3H), 7.34 – 7.28 (m, 4H), 7.25 – 7.21 (m, 1H), 7.18 (dd, *J* = 7.9, 5.9 Hz, 1H), 7.13 (d, *J* = 7.7 Hz, 1H), 7.08 – 6.95 (m, 5H), 4.68 (br, 2H). <sup>13</sup>C NMR (101 MHz, Chloroform-*d*) δ 170.7, 162.6 (d, *J*<sub>C-F</sub> = 247.4 Hz), 149.6, 148.7, 141.0 (d, *J*<sub>C-F</sub> = 7.5 Hz), 139.7, 138.8, 137.9 (d, *J*<sub>C-F</sub> = 1.9 Hz), 137.7, 136.6, 136.5, 134.1, 133.9, 130.7, 130.4 (d, *J*<sub>C-F</sub> = 8.1 Hz), 130.0, 128.8, 128.6, 128.5, 128.3, 127.8, 127.7, 124.8 (d, *J*<sub>C-F</sub> = 2.9 Hz), 122.7, 115.9 (d, *J*<sub>C-F</sub> = 22.1 Hz), 115.1 (d, *J*<sub>C-F</sub> = 20.9 Hz), 50.6. HRMS (m/z, ESI-TOF): Calcd for C<sub>31</sub>H<sub>22</sub>ClFN<sub>2</sub>O<sub>3</sub>SNa<sup>+</sup> [M+Na<sup>+</sup>] 579.0916, found 579.0915.

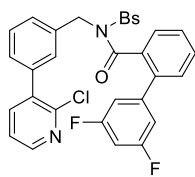

***N*-(3-(2-chloropyridin-3-yl)benzyl)-3',5'-difluoro-*N*-(phenylsulfonyl)-[1,1'-biphenyl]-2-carboxamide (5e).** The general procedure **i** was followed. Yield: 403 mg, (70 %).

$^1\text{H}$  NMR (400 MHz, Chloroform-*d*)  $\delta$  8.40 (dd,  $J = 4.7, 1.9$  Hz, 1H), 7.66 (d,  $J = 8.4$  Hz, 2H), 7.59 (t,  $J = 7.5$  Hz, 1H), 7.54 (dd,  $J = 7.6, 1.9$  Hz, 1H), 7.48 – 7.39 (m, 3H), 7.37 – 7.27 (m, 4H), 7.25 (d,  $J = 6.5$  Hz, 1H), 7.15 – 7.05 (m, 3H), 6.82 – 6.69 (m, 3H), 4.77 (br, 2H).  $^{13}\text{C}$  NMR (101 MHz, Chloroform-*d*)  $\delta$  170.3, 162.7 (dd,  $J_{\text{C-F}} = 249.8, 12.9$  Hz), 149.6, 148.7, 142.1 (t,  $J_{\text{C-F}} = 9.6$  Hz), 139.7, 138.8, 137.8, 137.2 (t,  $J_{\text{C-F}} = 2.2$  Hz), 136.5, 136.4, 134.1, 134.0, 130.8, 129.8, 128.94, 128.93, 128.7, 128.64, 128.63, 128.2, 128.1, 127.8, 122.7, 112.2 (dd,  $J_{\text{C-F}} = 25.9, 11.0$  Hz), 103.5 (t,  $J_{\text{C-F}} = 25.0$  Hz), 50.5. HRMS ( $m/z$ , ESI-TOF): Calcd for  $\text{C}_{31}\text{H}_{21}\text{ClF}_2\text{N}_2\text{O}_3\text{SNa}^+$  [ $\text{M}+\text{Na}^+$ ] 597.0822, found 597.0821.

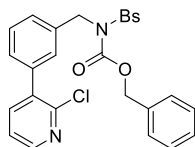

**benzyl (3-(2-chloropyridin-3-yl)benzyl)(phenylsulfonyl)carbamate (5f).** The general procedure **ii** was followed. Yield: 394 mg, (80 %).

$^1\text{H}$  NMR (400 MHz, Chloroform-*d*)  $\delta$  8.42 (dd,  $J = 4.9, 1.9$  Hz, 1H), 7.66 (d,  $J = 7.9$  Hz, 2H), 7.59 (dd,  $J = 7.4, 1.9$  Hz, 1H), 7.56 – 7.47 (m, 2H), 7.45 – 7.43 (m, 3H), 7.37 – 7.24 (m, 6H), 7.13 (d,  $J = 6.4$  Hz, 2H), 5.16 (s, 2H), 5.11 (s, 2H).  $^{13}\text{C}$  NMR (101 MHz, Chloroform-*d*)  $\delta$  152.4, 149.7, 148.6, 139.8, 139.2, 137.8, 137.2, 136.7, 134.3, 133.6, 129.3, 129.0, 128.8, 128.7, 128.64, 128.62, 128.6, 128.5, 122.7, 69.5, 49.9. HRMS ( $m/z$ , ESI-TOF): Calcd for  $\text{C}_{26}\text{H}_{21}\text{ClN}_2\text{O}_4\text{SNa}^+$  [ $\text{M}+\text{Na}^+$ ] 515.0803, found 515.0803.

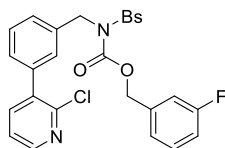

**3-fluorobenzyl (3-(2-chloropyridin-3-yl)benzyl)(phenylsulfonyl)carbamate<sup>1</sup> (5g).**

The general procedure **ii** was followed. Yield: 357 mg, (70 %).

$^1\text{H}$  NMR (400 MHz, Chloroform-*d*)  $\delta$  8.39 (d,  $J = 3.8$  Hz, 1H), 7.65 (d,  $J = 7.9$  Hz, 2H), 7.59 (d,  $J = 7.5$  Hz, 1H), 7.53 (t,  $J = 7.4$  Hz, 1H), 7.50 – 7.39 (m, 4H), 7.35 (t,  $J = 7.8$  Hz, 2H), 7.30 (dd,  $J = 7.5, 4.8$  Hz, 1H), 7.20 (td,  $J = 7.9, 5.8$  Hz, 1H), 6.95 (td,  $J = 8.5, 2.5$  Hz, 1H), 6.89 (d,  $J = 7.5$  Hz, 1H), 6.71 (d,  $J = 9.1$  Hz, 1H), 5.15 (s, 3H), 5.07 (s, 3H).  $^{13}\text{C}$  NMR (101 MHz, Chloroform-*d*)  $\delta$  162.7 (d,  $J_{\text{C-F}} = 246.9$  Hz), 152.3, 149.7, 148.6, 139.8, 139.2, 137.9, 137.1, 136.8 (d,  $J_{\text{C-F}} = 7.4$  Hz), 136.6, 133.7, 130.3 (d,  $J_{\text{C-F}} = 8.1$  Hz), 129.2, 129.1, 128.80, 128.76, 128.5, 128.4, 123.9 (d,  $J_{\text{C-F}} = 3.0$  Hz), 122.7, 115.6 (d,  $J_{\text{C-F}} = 21.1$  Hz), 115.1 (d,  $J_{\text{C-F}} = 21.9$  Hz), 68.4 (d,  $J_{\text{C-F}} = 2.0$  Hz), 50.0. HRMS ( $m/z$ , ESI-TOF): Calcd for  $\text{C}_{26}\text{H}_{20}\text{ClFN}_2\text{O}_4\text{SNa}^+$  [ $\text{M}+\text{Na}^+$ ] 533.0709, found 533.0709.

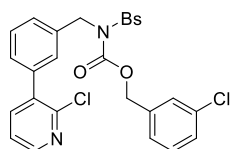

**3-chlorobenzyl (3-(2-chloropyridin-3-yl)benzyl)(phenylsulfonyl)carbamate (5h).**

The general procedure **ii** was followed. Yield: 105 mg, (20 %).

$^1\text{H}$  NMR (400 MHz, Chloroform-*d*)  $\delta$  8.40 (dd,  $J = 4.8, 1.9$  Hz, 1H), 7.64 (d,  $J = 7.2$  Hz, 2H), 7.59 (dd,  $J = 7.5, 2.0$  Hz, 1H), 7.54 (t,  $J = 7.5$  Hz, 1H), 7.51 – 7.39 (m, 4H), 7.35 (t,  $J = 7.9$  Hz, 2H), 7.30 (dd,  $J = 7.6, 4.7$  Hz, 1H), 7.28 – 7.21 (m, 1H), 7.17 (t,  $J = 8.0$  Hz, 1H), 7.01 – 6.99 (m, 2H), 5.14 (s, 2H), 5.05 (s, 2H).  $^{13}\text{C}$  NMR (101 MHz, Chloroform-*d*)  $\delta$  152.3, 149.7, 148.6, 139.8, 139.2, 137.9, 137.1, 136.7, 136.4, 134.5, 133.8, 130.0, 129.3, 129.1, 128.9, 128.83, 128.80, 128.6, 128.40, 128.36, 126.5, 122.7, 68.4, 50.0. HRMS ( $m/z$ , ESI-TOF): Calcd for  $\text{C}_{26}\text{H}_{21}\text{Cl}_2\text{N}_2\text{O}_4\text{S}^+$  [ $\text{M}+\text{H}^+$ ] 527.0594, found 527.0596.

## 2.4 Optimization of Reaction Conditions

**Table S1: Optimization by Varying Different Templates.**

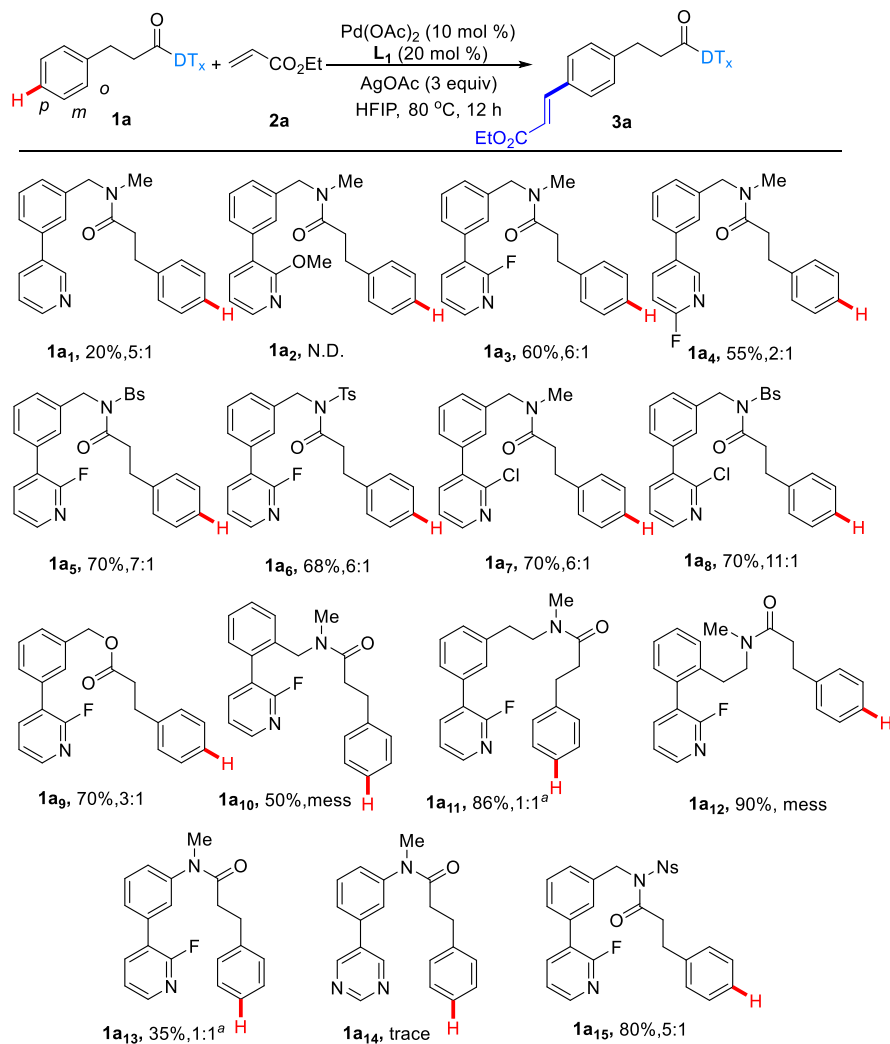

Reaction condition: **1a** (0.1 mmol), **2a** (2 equiv), Pd(OAc)<sub>2</sub> (10 mol %), AgOAc (2 equiv), 2-hydroxy-3-trifluoromethylpyridine(L<sub>1</sub>) (20 mol %), HFIP (1.0 mL), 80 °C, 12 h. Yield and selectivity are based on <sup>1</sup>H NMR of the crude reaction mixture using CH<sub>2</sub>Br<sub>2</sub> as internal standard; products ratios were determined from crude <sup>1</sup>H NMR and products of others were mainly *m*- and *o*-isomers. N.D.= no detected. <sup>a</sup>Ratios of two major products, C-H olefination sites not determined.



**Table S2: Optimization by Varying Different Solvents**

| entry | solvents (1 mL) | <b>3a8</b> yield (%) <sup>a</sup> | Ratio ( <i>p</i> :others) <sup>a</sup> |
|-------|-----------------|-----------------------------------|----------------------------------------|
| 1     | HFIP            | 75                                | 10:1                                   |
| 2     | TFE             | 60                                | 7:1                                    |
| 3     | AcOH            | trace                             | -                                      |
| 4     | TFA             | 0                                 | -                                      |

Reaction condition: **1a8** (0.1 mmol), **2a** (2 equiv), Pd(OAc)<sub>2</sub> (10 mol %), AgOAc (2 equiv), 2-hydroxy-3-trifluoromethylpyridine (20 mol %), solvents (1.0 mL), 80 °C, 36 h. <sup>a</sup>Yield and selectivity are based on <sup>1</sup>H NMR of the crude reaction mixture using CH<sub>2</sub>Br<sub>2</sub> as internal standard; products ratios were determined from crude <sup>1</sup>H NMR and products of others were mainly *m*- and *o*-isomers.

**Table S3: Optimization of Palladium Catalyst**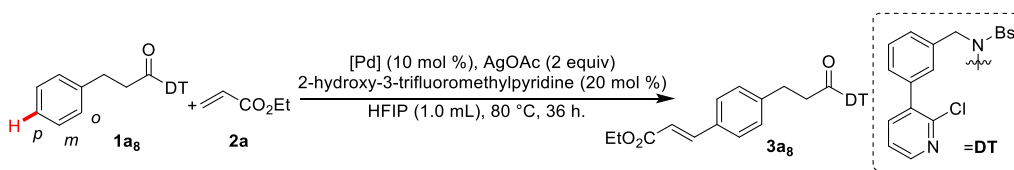

| entry | [Pd]                                  | <b>3a8</b> yield (%) <sup>a</sup> | Ratio ( <i>p</i> :others) <sup>a</sup> |
|-------|---------------------------------------|-----------------------------------|----------------------------------------|
| 1     | Pd(OAc) <sub>2</sub>                  | 75                                | 11:1                                   |
| 2     | Pd(OTFA) <sub>2</sub>                 | 61                                | 9:1                                    |
| 3     | PdCl <sub>2</sub>                     | 46                                | 9:1                                    |
| 4     | Pd(MeCN) <sub>2</sub> Cl <sub>2</sub> | 50                                | 11:1                                   |

Reaction condition: **1a8** (0.1 mmol), **2a** (2 equiv), [Pd] (10 mol %), AgOAc (2 equiv), 2-hydroxy-3-trifluoromethylpyridine (20 mol %), HFIP (1.0 mL), 80 °C, 36 h. <sup>a</sup>Yield and selectivity are based on <sup>1</sup>H NMR of the crude reaction mixture using CH<sub>2</sub>Br<sub>2</sub> as internal standard; products ratios were determined from crude <sup>1</sup>H NMR and products of others were mainly *m*- and *o*-isomers.

**Table S4: Optimization by Varying Different Ag Salts**

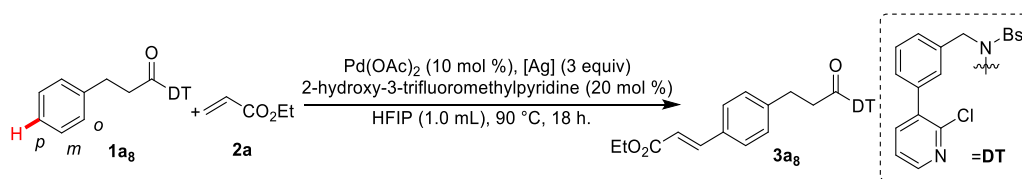

| entry | [Ag]                            | <b>3a<sub>8</sub></b> yield (%) <sup>a</sup> | Ratio ( <i>p</i> :others) <sup>a</sup> |
|-------|---------------------------------|----------------------------------------------|----------------------------------------|
| 1     | AgF <sub>2</sub>                | 11                                           | 5:1                                    |
| 2     | Ag <sub>2</sub> SO <sub>4</sub> | 33                                           | mess                                   |
| 3     | Ag <sub>2</sub> O               | 0                                            | -                                      |
| 4     | AgTFA                           | 40                                           | 8:1                                    |
| 5     | AgOBz                           | 0                                            | -                                      |
| 6     | AgOPiv                          | 30                                           | 6:1                                    |
| 7     | Ag <sub>2</sub> CO <sub>3</sub> | 69                                           | 10:1                                   |
| 8     | AgSbF <sub>6</sub>              | 0                                            | -                                      |
| 9     | AgNO <sub>3</sub>               | 63                                           | 10:1                                   |
| 10    | AgBF <sub>4</sub>               | 0                                            | -                                      |
| 11    | Ag <sub>3</sub> PO <sub>4</sub> | 20                                           | 4:1                                    |
| 12    | AgPF <sub>6</sub>               | 0                                            | -                                      |
| 13    | Ag <sub>2</sub> WO <sub>4</sub> | 14                                           | 6:1                                    |
| 14    | AgOTf                           | trace                                        | 10:1                                   |

Reaction condition: **1a<sub>8</sub>** (0.1 mmol), **2a** (2 equiv), Pd(OAc)<sub>2</sub> (10 mol%), [Ag] (3 equiv), 2-hydroxy-3-trifluoromethylpyridine (20 mol %), HFIP (1.0 mL), 90 °C, 18 h. <sup>a</sup>Yield and selectivity are based on <sup>1</sup>H NMR of the crude reaction mixture using CH<sub>2</sub>Br<sub>2</sub> as internal standard; products ratios were determined from crude <sup>1</sup>H NMR and products of others were mainly *m*- and *o*-isomers.

**Table S5: Optimization of Reaction Concentration**

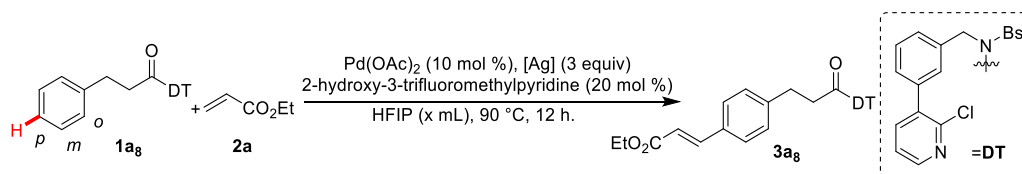

| entry | [x mL] | <b>3a<sub>8</sub></b> yield (%) <sup>a</sup> | Ratio ( <i>p</i> :others) <sup>a</sup> |
|-------|--------|----------------------------------------------|----------------------------------------|
| 1     | 0.5    | 65                                           | 7:1                                    |
| 2     | 1.0    | 70                                           | 10:1                                   |
| 3     | 1.5    | 90 (79) <sup>b</sup>                         | 15:1                                   |

Reaction condition: **1a<sub>8</sub>** (0.1 mmol), **2a** (2 equiv), Pd(OAc)<sub>2</sub> (10 mol %), AgOAc (3 equiv), 2-hydroxy-3-trifluoromethylpyridine (20 mol %), HFIP (x mL), 90 °C, 12 h.

<sup>a</sup>Yield and selectivity are based on <sup>1</sup>H NMR of the crude reaction mixture using CH<sub>2</sub>Br<sub>2</sub> as internal standard; products ratios were determined from crude <sup>1</sup>H NMR and products of others were mainly *m*- and *o*-isomers. <sup>b</sup>Isolated yield.

**Table S6: Optimization by Varying Different Cu Salts**

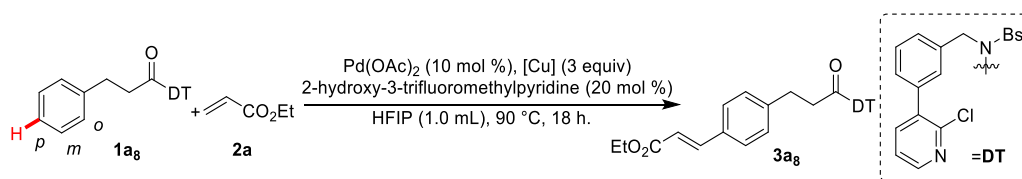

| entry | [Cu]                 | <b>3a<sub>8</sub></b> yield (%) <sup>a</sup> | Ratio ( <i>p</i> :others) <sup>a</sup> |
|-------|----------------------|----------------------------------------------|----------------------------------------|
| 1     | Cu(TFA) <sub>2</sub> | 21                                           | 7:1                                    |
| 2     | CuCl <sub>2</sub>    | -                                            | -                                      |
| 3     | CuI                  | 11                                           | 5:1                                    |
| 4     | Cu(OAc) <sub>2</sub> | 40                                           | 8:1                                    |

Reaction condition: **1a<sub>8</sub>** (0.1 mmol), **2a** (2 equiv), Pd(OAc)<sub>2</sub> (10 mol %), [Cu] (3 equiv), 2-hydroxy-3-trifluoromethylpyridine (20 mol %), HFIP (1.0 mL), 90 °C, 18 h. <sup>a</sup>Yield and selectivity are based on <sup>1</sup>H NMR of the crude reaction mixture using CH<sub>2</sub>Br<sub>2</sub> as internal standard; products ratios were determined from crude <sup>1</sup>H NMR and products of others were mainly *m*- and *o*-isomers.

**Table S7: Optimization of Reaction Temperature**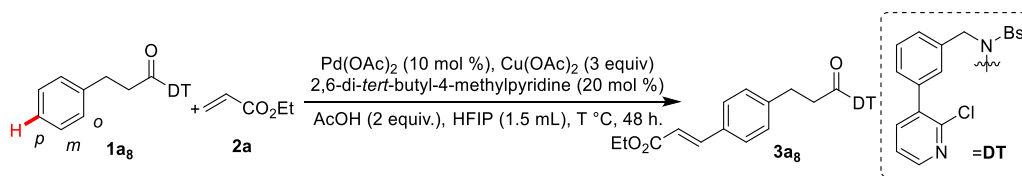

| entry | Temperature (°C) | <b>3a<sub>8</sub></b> yield (%) <sup>a</sup> | Ratio ( <i>p</i> :others) <sup>a</sup> |
|-------|------------------|----------------------------------------------|----------------------------------------|
| 1     | 70               | 72                                           | 12:1                                   |
| 2     | 80               | 53                                           | 12:1                                   |
| 3     | 90               | 29                                           | 13:1                                   |
| 4     | 60               | 68                                           | 12:1                                   |
| 5     | 65               | 72                                           | 11:1                                   |
| 6     | 75               | 80 (72) <sup>b</sup>                         | 12:1                                   |

Reaction condition: **1a<sub>8</sub>** (0.1 mmol), **2a** (3 equiv), Pd(OAc)<sub>2</sub> (10 mol %), Cu(OAc)<sub>2</sub> (0.5 equiv), 2,6-di-*tert*-butyl-4-methylpyridine (20 mol %), AcOH (2 equiv), HFIP (1.5 mL), T °C, 48 h. <sup>a</sup>Yield and selectivity are based on <sup>1</sup>H NMR of the crude reaction mixture using CH<sub>2</sub>Br<sub>2</sub> as internal standard; products ratios were determined from crude <sup>1</sup>H NMR and products of others were mainly *m*- and *o*-isomers. <sup>b</sup>Isolated yield.

**Table S8: Optimization by Varying Different Acids**

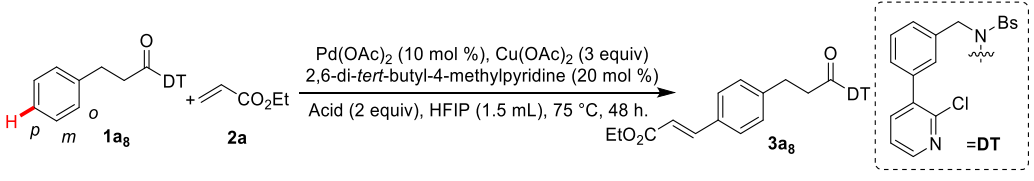

| entry | Acid (2 equiv.)                                                                     | <b>3a8</b> yield (%) <sup>a</sup> | Ratio ( <i>p</i> :others) <sup>a</sup> |
|-------|-------------------------------------------------------------------------------------|-----------------------------------|----------------------------------------|
| 1     | TFA                                                                                 | -                                 | -                                      |
| 2     |    | -                                 | -                                      |
| 3     |    | -                                 | -                                      |
| 4     |    | 74                                | 11:1                                   |
| 5     | HCOOH                                                                               | 70                                | 10:1                                   |
| 6     |    | 63                                | 12:1                                   |
| 7     |   | 68                                | 12:1                                   |
| 8     |  | 64                                | 12:1                                   |

Reaction condition: **1a8** (0.1 mmol), **2a** (3 equiv), Pd(OAc)<sub>2</sub> (10 mol %), Cu(OAc)<sub>2</sub> (0.5 equiv), 2,6-di-tert-butyl-4-methylpyridine (20 mol %), Acid (2 equiv), HFIP (1.5 mL), T °C, 48 h. <sup>a</sup>Yield and selectivity are based on <sup>1</sup>H NMR of the crude reaction mixture using CH<sub>2</sub>Br<sub>2</sub> as internal standard; products ratios were determined from crude <sup>1</sup>H NMR and products of others were mainly *m*- and *o*-isomers.

## 2.5 General Procedures and Characterizations of Products

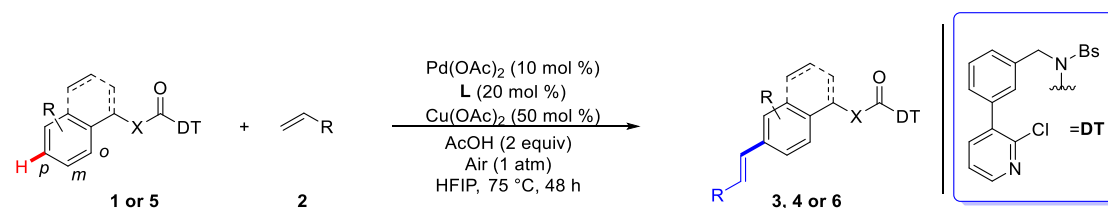

### General Procedure A

An oven-dried Schlenk tube (50 mL) was charged with a magnetic stir bar, under air or O<sub>2</sub> atmosphere, **1** (0.1 mmol, 1.0 equiv), **2** (0.3 mmol, 3.0 equiv), Pd(OAc)<sub>2</sub> (2.2 mg, 0.01 mmol, 10 mol %), Cu(OAc)<sub>2</sub> (9.1 mg, 0.05 mmol, 0.5 equiv), 2,6-di-tert-butyl-4-methylpyridine (4.1 mg, 0.02 mmol, 20 mol %), AcOH (0.2 mmol, 2.0 equiv), HFIP (1.5 mL) were added. The reaction mixture was stirred vigorously on a preheated hotplate (70 or 75 °C) for 48 h and then cooled down to room temperature. After removal of HFIP under reduced pressure, then diluted with EtOAc (10 mL) and filtered through a short pad of Celite and neutral alumina. The sealed tube and Celite and neutral alumina pad were washed with an additional 50 mL EtOAc. The filtrate was concentrated in vacuo, and crude <sup>1</sup>H NMR spectrum was taken using CH<sub>2</sub>Br<sub>2</sub> as internal standard. Products ratios were determined from crude <sup>1</sup>H NMR and products of others were mainly *m*- and *o*-isomers. The resulting residue was purified by flash silica gel chromatography or preparative thin layer chromatography using petroleum ether/EtOAc (3:1-2:1) as the eluent to give the desired products. Isolated yield of pure desired *para*-isomer was reported herein.

### General Procedure B

An oven-dried 15 mL sealed tube (with a Teflon cap) equipped with a magnetic stir bar was charged with compound **1** (0.1 mmol, 1.0 equiv), **2** (0.2 mmol, 2.0 equiv or 0.3 mmol, 3.0 equiv), Pd(OAc)<sub>2</sub> (2.2 mg, 0.01 mmol, 10 mol %), AgOAc (50.1 mg, 0.3 mmol, 3.0 equiv), 3-(trifluoromethyl)pyridin-2-ol (3.2 mg, 0.02 mmol, 20 mol %). HFIP (1.0 mL or 1.5 mL) were added. The reaction mixture was stirred vigorously on a preheated hotplate (80, 90 or 100 °C) for 24 h and then cooled down to room temperature. After removal of HFIP under reduced pressure, then diluted with EtOAc (10 mL) and filtered through a short pad of Celite and neutral alumina. The sealed tube and Celite and neutral alumina pad were washed with an additional 50 mL EtOAc. The filtrate was concentrated in vacuo, and crude <sup>1</sup>H NMR spectrum was taken using



CH<sub>2</sub>Br<sub>2</sub> as internal standard. The resulting residue was purified by flash silica gel chromatography or preparative thin layer chromatography using petroleum ether/EtOAc (3:1-2:1) as the eluent to give the desired products. Isolated yield of pure desired *para*-isomer was reported herein.

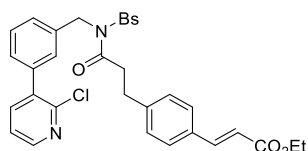

**Ethyl (*E*)-3-(4-(3-(*N*-(3-(2-chloropyridin-3-yl)benzyl)phenylsulfonamido)-3-oxo-propyl)phenyl)acrylate (3a)**

The general procedure **A** was followed. (75 °C under air) Conversion: 81 %. Yield: 42.3 mg (72%), *p*: others = 12:1. When the general procedure **B** was followed. [**2** (2.0 equiv), HFIP (1.5 mL), 90 °C], Conversion: 87 %. Yield: 47.0 mg (79%), *p*: others = 15:1. <sup>1</sup>H NMR (400 MHz, Chloroform-*d*) δ 8.40 (dd, *J* = 4.8, 1.9 Hz, 1H), 7.74 – 7.65 (m, 2H), 7.64 – 7.57 (m, 3H), 7.45 (t, *J* = 7.7 Hz, 2H), 7.40 – 7.36 (m, 4H), 7.34 – 7.27 (m, 3H), 7.00 (d, *J* = 7.9 Hz, 2H), 6.37 (d, *J* = 16.0 Hz, 1H), 5.13 (s, 2H), 4.26 (q, *J* = 7.1 Hz, 2H), 2.95 – 2.92 (m, 2H), 2.90 – 2.86 (m, 2H), 1.34 (t, *J* = 7.1 Hz, 3H). <sup>13</sup>C NMR (101 MHz, Chloroform-*d*) δ 172.2, 167.2, 149.7, 148.7, 144.3, 142.8, 139.8, 139.6, 137.9, 136.9, 136.6, 134.0, 132.6, 129.4, 129.0, 128.9, 128.8, 128.3, 128.1, 127.8, 122.7, 117.8, 60.6, 49.3, 37.8, 30.5, 14.5. HRMS (*m/z*, ESI-TOF): Calcd for C<sub>32</sub>H<sub>29</sub>ClN<sub>2</sub>O<sub>5</sub>SNa<sup>+</sup> [*M*+Na<sup>+</sup>] 611.1378, found 611.1378.

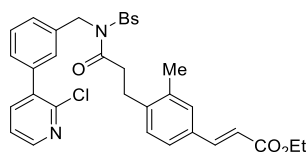

**Ethyl (*E*)-3-(4-(3-(*N*-(3-(2-chloropyridin-3-yl)benzyl)phenylsulfonamido)-3-oxo-propyl)-3-methylphenyl)acrylate (3b)**

The general procedure **A** was followed. (75 °C under air) Conversion: 80 %. Yield: 45.7 mg (76%), *p*: others = 15:1.

<sup>1</sup>H NMR (400 MHz, Chloroform-*d*) δ 8.39 (dd, *J* = 4.7, 1.9 Hz, 1H), 7.75 – 7.67 (m, 2H), 7.65 – 7.54 (m, 3H), 7.49 – 7.35 (m, 6H), 7.30 (dd, *J* = 7.6, 4.8 Hz, 1H), 7.22 (s, 1H), 7.16 (d, *J* = 8.0 Hz, 1H), 6.89 (d, *J* = 7.8 Hz, 1H), 6.36 (d, *J* = 16.0 Hz, 1H), 5.15 (s, 2H), 4.25 (q, *J* = 7.1 Hz, 2H), 2.86 (s, 4H), 2.14 (s, 3H), 1.33 (t, *J* = 7.1 Hz, 3H). <sup>13</sup>C

NMR (101 MHz, Chloroform-*d*)  $\delta$  172.4, 167.2, 149.6, 148.6, 144.4, 140.9, 139.8, 139.6, 137.9, 136.9, 136.7, 136.6, 134.0, 132.7, 130.0, 129.4, 129.1, 128.93, 128.91, 128.8, 128.1, 127.6, 125.9, 122.7, 117.6, 60.5, 49.4, 36.5, 27.9, 19.2, 14.4. HRMS (*m/z*, ESI-TOF): Calcd for C<sub>33</sub>H<sub>31</sub>ClN<sub>2</sub>O<sub>5</sub>SNa<sup>+</sup> [M+Na<sup>+</sup>] 625.1534, found 625.1534.

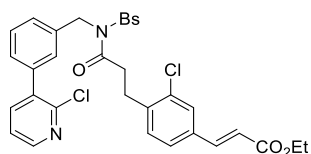

**Ethyl (*E*)-3-(3-chloro-4-(3-(*N*-(3-(2-chloropyridin-3-yl)benzyl)phenylsulfonamido)-3-oxopropyl)phenyl)acrylate (**3c**)**

The general procedure **B** was followed (**2** (2.0 equiv), HFIP (1.5 mL), 90 °C). Conversion: 80 %. Yield: 37.3 mg (60%), *p*: others = 7.5:1.

<sup>1</sup>H NMR (400 MHz, Chloroform-*d*)  $\delta$  8.40 (dd, *J* = 4.8, 2.0 Hz, 1H), 7.74 – 7.68 (m, 2H), 7.61 (td, *J* = 7.2, 2.0 Hz, 2H), 7.54 (d, *J* = 16.0 Hz, 1H), 7.45 (t, *J* = 7.8 Hz, 2H), 7.40 (s, 5H), 7.31 (dd, *J* = 7.6, 4.7 Hz, 1H), 7.21 (dd, *J* = 7.8, 1.8 Hz, 1H), 7.08 (d, *J* = 8.0 Hz, 1H), 6.37 (d, *J* = 16.0 Hz, 1H), 5.15 (s, 2H), 4.26 (q, *J* = 7.2 Hz, 2H), 3.00 – 2.93 (m, 4H), 1.34 (t, *J* = 7.1 Hz, 3H). <sup>13</sup>C NMR (101 MHz, Chloroform-*d*)  $\delta$  172.1, 166.8, 149.8, 148.7, 142.8, 139.9, 139.8, 139.6, 138.0, 136.9, 136.6, 134.60, 134.58, 134.0, 131.2, 129.4, 128.99, 128.97, 128.9, 128.8, 128.2, 127.7, 126.5, 122.7, 119.4, 60.8, 49.4, 36.0, 28.7, 14.4. HRMS (*m/z*, ESI-TOF): Calcd for C<sub>32</sub>H<sub>28</sub>Cl<sub>2</sub>N<sub>2</sub>O<sub>5</sub>SNa<sup>+</sup> [M+Na<sup>+</sup>] 645.0988, found 645.0988.

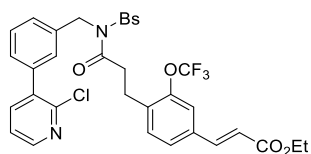

**Ethyl (*E*)-3-(4-(3-(*N*-(3-(2-chloropyridin-3-yl)benzyl)phenylsulfonamido)-3-oxopropyl)-3-(trifluoromethoxy)phenyl)acrylate (**3d**)**

The general procedure **B** was followed (**2** (2.0 equiv), HFIP (1.5 mL), 90 °C). Conversion: 69 %. Yield: 34.3 mg (51%), *p*: others = 13:1.

<sup>1</sup>H NMR (400 MHz, Chloroform-*d*)  $\delta$  8.32 (dd, *J* = 4.8, 2.0 Hz, 1H), 7.63 (d, *J* = 7.4 Hz, 2H), 7.57 – 7.47 (m, 3H), 7.38 (t, *J* = 7.8 Hz, 2H), 7.35 – 7.31 (m, 4H), 7.23 (dd, *J* = 7.5, 4.8 Hz, 1H), 7.21 – 7.15 (m, 2H), 7.03 (d, *J* = 7.9 Hz, 1H), 6.31 (d, *J* = 16.0 Hz, 1H), 5.07 (s, 2H), 4.19 (q, *J* = 7.1 Hz, 2H), 2.86 (s, 4H), 1.27 (t, *J* = 7.1 Hz, 3H). <sup>13</sup>C

NMR (101 MHz, Chloroform-*d*)  $\delta$  172.0, 166.6, 149.7, 148.7, 147.9, 142.8, 139.8, 139.5, 137.9, 136.9, 136.6, 134.7, 134.0, 131.4, 129.4, 129.0, 128.9, 128.8, 128.1, 127.6, 126.4, 122.7, 120.5 (d,  $J_{C-F}$  = 258.2 Hz), 119.62, 119.58, 119.56, 60.8, 49.4, 36.3, 25.1, 14.4. HRMS (m/z, ESI-TOF): Calcd for C<sub>33</sub>H<sub>28</sub>ClF<sub>3</sub>N<sub>2</sub>O<sub>6</sub>SNa<sup>+</sup> [M+Na<sup>+</sup>] 695.1201, found 695.1200.

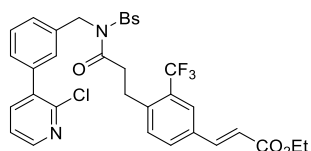

**Ethyl (*E*)-3-(4-(3-(*N*-(3-(2-chloropyridin-3-yl)benzyl)phenylsulfonamido)-3-oxo-propyl)-3-(trifluoromethyl)phenyl)acrylate (3e)**

The general procedure **B** was followed. (**2** (2.0 equiv), HFIP (1.5 mL), 90 °C). Conversion: 42 %. Yield: 25.0 mg (38%), *p*: others > 20:1.

<sup>1</sup>H NMR (400 MHz, Chloroform-*d*)  $\delta$  8.40 (dd,  $J$  = 4.8, 2.0 Hz, 1H), 7.71 – 7.68 (m, 3H), 7.65 – 7.57 (m, 3H), 7.51 – 7.38 (m, 7H), 7.31 (dd,  $J$  = 7.5, 4.8 Hz, 1H), 7.17 (d,  $J$  = 8.0 Hz, 1H), 6.43 (d,  $J$  = 16.0 Hz, 1H), 5.15 (s, 2H), 4.27 (q,  $J$  = 7.1 Hz, 2H), 3.06 (t,  $J$  = 7.5 Hz, 2H), 2.92 (t,  $J$  = 7.5 Hz, 2H), 1.34 (t,  $J$  = 7.1 Hz, 3H). <sup>13</sup>C NMR (101 MHz, Chloroform-*d*)  $\delta$  171.9, 166.6, 149.7, 148.7, 142.6, 141.0 (d,  $J_{C-F}$  = 1.1 Hz), 139.8, 139.5, 138.0, 136.9, 136.6, 134.0, 133.2, 131.9, 131.1, 129.4, 129.3 (d,  $J_{C-F}$  = 30.1 Hz), 129.00, 128.99, 128.87, 128.2, 127.6, 125.8 (q,  $J_{C-F}$  = 5.8 Hz), 124.1 (q,  $J_{C-F}$  = 271.4 Hz), 122.7, 119.8, 60.9, 49.5, 37.9, 27.5, 14.4. HRMS (m/z, ESI-TOF): Calcd for C<sub>33</sub>H<sub>28</sub>ClF<sub>3</sub>N<sub>2</sub>O<sub>5</sub>SNa<sup>+</sup> [M+Na<sup>+</sup>] 679.1252, found 679.1248.

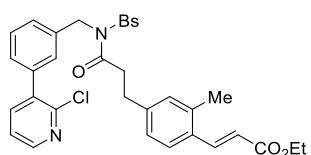

**Ethyl (*E*)-3-(4-(3-(*N*-(3-(2-chloropyridin-3-yl)benzyl)phenylsulfonamido)-3-oxo-propyl)-2-methylphenyl)acrylate (3f)**

The general procedure **A** was followed. (75 °C under air) Conversion: 60 %. Yield: 25.9 mg (43%), *p*: others = 7:1; (75 °C under O<sub>2</sub>) Yield: 30.8 mg (51%), *p*: others = 8:1.

<sup>1</sup>H NMR (400 MHz, Chloroform-*d*)  $\delta$  8.40 (dd,  $J$  = 4.8, 1.9 Hz, 1H), 7.90 (d,  $J$  = 15.9 Hz, 1H), 7.74 – 7.66 (m, 2H), 7.64 – 7.56 (m, 2H), 7.45 (t,  $J$  = 7.7 Hz, 2H), 7.41 – 7.36 (m, 5H), 7.30 (dd,  $J$  = 7.6, 4.8 Hz, 1H), 6.84 – 6.81 (m, 2H), 6.30 (d,  $J$  = 15.9 Hz, 1H),

5.14 (s, 2H), 4.26 (q,  $J = 7.1$  Hz, 2H), 2.92 (t,  $J = 7.5$  Hz, 2H), 2.84 (t,  $J = 7.5$  Hz, 2H), 2.33 (s, 3H), 1.34 (t,  $J = 7.1$  Hz, 3H).  $^{13}\text{C}$  NMR (101 MHz, Chloroform-*d*)  $\delta$  172.3, 167.2, 149.7, 148.7, 142.4, 142.0, 139.8, 139.6, 137.92, 137.89, 137.0, 136.6, 133.9, 131.6, 130.9, 129.4, 129.0, 128.9, 128.8, 128.1, 127.7, 126.7, 126.4, 122.7, 118.8, 60.6, 49.3, 37.8, 30.4, 19.9, 14.5. HRMS ( $m/z$ , ESI-TOF): Calcd for  $\text{C}_{33}\text{H}_{31}\text{ClN}_2\text{O}_5\text{SNa}^+$  [ $\text{M}+\text{Na}^+$ ] 625.1534, found 625.1533.

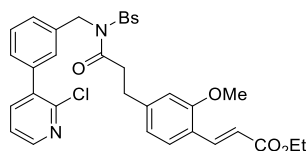

**Ethyl (*E*)-3-(4-(3-(*N*-(3-(2-chloropyridin-3-yl)benzyl)phenylsulfonamido)-3-oxo-propyl)-2-methoxyphenyl)acrylate (3g)**

The general procedure **A** was followed. (75 °C under air) Conversion: 72 %. Yield: 37.1 mg (60%), *p*: others > 20:1.

$^1\text{H}$  NMR (400 MHz, Chloroform-*d*)  $\delta$  8.40 (dd,  $J = 4.8, 1.9$  Hz, 1H), 7.91 (d,  $J = 16.2$  Hz, 1H), 7.75 – 7.66 (m, 2H), 7.64 – 7.56 (m, 2H), 7.51 – 7.34 (m, 6H), 7.30 (m, 2H), 6.61 (s, 1H), 6.56 (d,  $J = 7.9$  Hz, 1H), 6.47 (d,  $J = 16.1$  Hz, 1H), 5.14 (s, 2H), 4.26 (q,  $J = 7.1$  Hz, 2H), 3.77 (s, 3H), 2.97 – 2.93 (m, 2H), 2.92 – 2.86 (m, 2H), 1.34 (t,  $J = 7.1$  Hz, 3H).  $^{13}\text{C}$  NMR (101 MHz, Chloroform-*d*)  $\delta$  172.2, 167.7, 158.4, 149.6, 148.6, 144.4, 139.8, 139.7, 139.6, 137.9, 136.9, 136.5, 133.9, 129.3, 129.2, 128.9, 128.8, 128.0, 127.6, 122.7, 121.6, 120.5, 118.3, 111.4, 60.4, 55.5, 49.3, 37.8, 30.9, 14.5. HRMS ( $m/z$ , ESI-TOF): Calcd for  $\text{C}_{33}\text{H}_{31}\text{ClN}_2\text{O}_6\text{SNa}^+$  [ $\text{M}+\text{Na}^+$ ] 641.1484, found 641.1484.

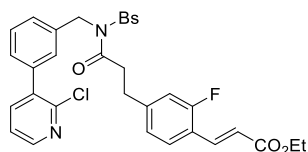

**Ethyl (*E*)-3-(4-(3-(*N*-(3-(2-chloropyridin-3-yl)benzyl)phenylsulfonamido)-3-oxo-propyl)-2-fluorophenyl)acrylate (3h)**

The general procedure **A** was followed (75 °C under air). Conversion: 85 %. Yield: 48.5 mg (80%), *p*: others > 20:1. The general procedure **B** was followed. (2 (2.0 equiv), HFIP (1.5 mL), 90 °C). Yield: 43.6 mg (72%), *p*: others = 20:1.

$^1\text{H}$  NMR (400 MHz, Chloroform-*d*)  $\delta$  8.39 (dd,  $J = 4.8, 2.0$  Hz, 1H), 7.75 – 7.65 (m, 3H), 7.60 (td,  $J = 7.6, 1.7$  Hz, 2H), 7.45 (t,  $J = 7.7$  Hz, 2H), 7.42 – 7.34 (m, 4H), 7.34

– 7.27 (m, 2H), 6.78 (dd,  $J = 7.9, 1.7$  Hz, 1H), 6.68 (dd,  $J = 11.5, 1.7$  Hz, 1H), 6.45 (d,  $J = 16.1$  Hz, 1H), 5.13 (s, 2H), 4.26 (q,  $J = 7.1$  Hz, 2H), 2.95 – 2.90 (m, 2H), 2.88 – 2.84 (m, 2H), 1.33 (t,  $J = 7.1$  Hz, 3H).  $^{13}\text{C}$  NMR (101 MHz, Chloroform-*d*)  $\delta$  171.9, 167.0, 161.2 (d,  $J_{\text{C-F}} = 254.3$  Hz), 149.6, 148.6, 145.0 (d,  $J_{\text{C-F}} = 8.2$  Hz), 139.7, 139.5, 137.9, 137.0 (d,  $J_{\text{C-F}} = 2.6$  Hz), 136.8, 136.6, 134.0, 129.4, 129.1 (d,  $J_{\text{C-F}} = 3.6$  Hz), 129.01, 128.96, 128.8, 128.1, 127.6, 124.6 (d,  $J_{\text{C-F}} = 3.1$  Hz), 122.7, 120.5 (d,  $J_{\text{C-F}} = 11.9$  Hz), 120.3 (d,  $J_{\text{C-F}} = 6.6$  Hz), 116.0 (d,  $J_{\text{C-F}} = 21.9$  Hz), 60.7, 49.3, 37.4, 30.2, 14.4. HRMS ( $m/z$ , ESI-TOF): Calcd for  $\text{C}_{32}\text{H}_{28}\text{ClFN}_2\text{O}_5\text{SNa}^+$  [ $\text{M}+\text{Na}^+$ ] 629.1284, found 629.1280.

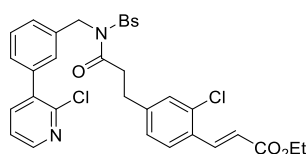

**Ethyl (*E*)-3-(2-chloro-4-(3-(*N*-(3-(2-chloropyridin-3-yl)benzyl)phenylsulfonamido)-3-oxopropyl)phenyl)acrylate (3i)**

The general procedure **B** was followed (**2** (2.0 equiv), HFIP (1.5 mL), 90 °C). Conversion: 75 %. Yield: 37.3 mg (60%), *p*: others > 20:1.

$^1\text{H}$  NMR (400 MHz, Chloroform-*d*)  $\delta$  8.39 (dd,  $J = 4.8, 1.9$  Hz, 1H), 8.00 (d,  $J = 16.0$  Hz, 1H), 7.68 (d,  $J = 7.5$  Hz, 2H), 7.64 – 7.57 (m, 2H), 7.45 (t,  $J = 7.8$  Hz, 2H), 7.42 – 7.37 (m, 5H), 7.34 – 7.28 (m, 1H), 7.02 (s, 1H), 6.90 (d,  $J = 8.0$  Hz, 1H), 6.36 (d,  $J = 16.0$  Hz, 1H), 5.14 (s, 2H), 4.27 (q,  $J = 7.1$  Hz, 2H), 2.93 (t,  $J = 6.9$  Hz, 2H), 2.85 (t,  $J = 6.9$  Hz, 2H), 1.34 (t,  $J = 7.1$  Hz, 3H).  $^{13}\text{C}$  NMR (101 MHz, Chloroform-*d*)  $\delta$  171.9, 166.7, 149.7, 148.7, 144.0, 140.1, 139.8, 139.5, 137.9, 136.9, 136.6, 135.0, 134.1, 130.7, 129.9, 129.4, 129.1, 129.0, 128.9, 128.2, 127.7, 127.6, 127.4, 122.7, 120.5, 60.8, 49.3, 37.5, 30.1, 14.4. HRMS ( $m/z$ , ESI-TOF): Calcd for  $\text{C}_{32}\text{H}_{28}\text{Cl}_2\text{N}_2\text{O}_5\text{SNa}^+$  [ $\text{M}+\text{Na}^+$ ] 645.0988, found 645.0988.

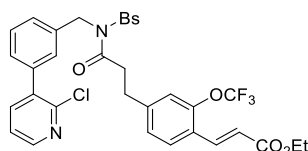

**Ethyl (*E*)-3-(4-(3-(*N*-(3-(2-chloropyridin-3-yl)benzyl)phenylsulfonamido)-3-oxopropyl)-2-(trifluoromethoxy)phenyl)acrylate (3j)**

The general procedure **B** was followed (**2** (2.0 equiv), HFIP (1.5 mL), 90 °C). Conversion: 60 %. Yield: 33.6 mg (50%), *p*: others > 20:1.

<sup>1</sup>H NMR (400 MHz, Chloroform-*d*) δ 8.39 (d, *J* = 3.6 Hz, 1H), 7.83 (d, *J* = 16.1 Hz, 1H), 7.71 – 7.66 (m, 2H), 7.65 – 7.56 (m, 2H), 7.51 – 7.37 (m, 7H), 7.31 (dd, *J* = 7.6, 4.7 Hz, 1H), 7.00 – 6.88 (m, 2H), 6.41 (d, *J* = 16.1 Hz, 1H), 5.14 (s, 2H), 4.27 (q, *J* = 7.1 Hz, 2H), 2.96 – 2.87 (m, 4H), 1.34 (t, *J* = 7.1 Hz, 3H). <sup>13</sup>C NMR (101 MHz, Chloroform-*d*) δ 171.8, 166.6, 149.7, 148.7, 147.5 (d, *J* = 1.5 Hz), 144.6, 139.8, 139.5, 138.0, 137.1, 136.9, 136.6, 134.1, 129.4, 129.1, 129.0, 128.9, 128.2, 128.1, 127.6, 127.3, 125.9, 122.7, 121.4, 120.8, 120.5 (q, *J* = 258.7 Hz), 60.8, 49.4, 37.6, 30.3, 14.4. HRMS (m/z, ESI-TOF): Calcd for C<sub>33</sub>H<sub>28</sub>ClF<sub>3</sub>N<sub>2</sub>O<sub>6</sub>SNa<sup>+</sup> [M+Na<sup>+</sup>] 695.1201, found 695.1201.

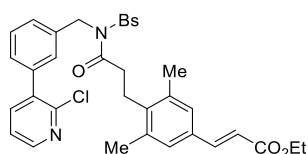

**Ethyl (*E*)-3-(4-(3-(*N*-(3-(2-chloropyridin-3-yl)benzyl)phenylsulfonamido)-3-oxo-propyl)-3,5-dimethylphenyl)acrylate (**3k**)**

The general procedure **A** was followed (75 °C under O<sub>2</sub>). Conversion: 65 %. Yield: 35.1 mg (57%), *p*: others = 8:1.

<sup>1</sup>H NMR (400 MHz, Chloroform-*d*) δ 8.40 (dd, *J* = 4.8, 1.9 Hz, 1H), 7.73 (dd, *J* = 7.3, 1.7 Hz, 2H), 7.65 – 7.59 (m, 2H), 7.56 (d, *J* = 16.0 Hz, 1H), 7.49 – 7.40 (m, 6H), 7.31 (dd, *J* = 7.5, 4.8 Hz, 1H), 7.10 (s, 2H), 6.36 (d, *J* = 16.0 Hz, 1H), 5.18 (s, 2H), 4.24 (q, *J* = 7.1 Hz, 2H), 2.91 – 2.82 (m, 2H), 2.69 – 2.65 (m, 2H), 2.11 (s, 6H), 1.32 (t, *J* = 7.1 Hz, 3H). <sup>13</sup>C NMR (101 MHz, Chloroform-*d*) δ 172.6, 167.3, 149.7, 148.7, 144.5, 139.8, 139.6, 139.5, 138.0, 137.0, 136.9, 136.6, 134.0, 132.4, 129.4, 129.00, 128.96, 128.8, 128.0, 127.7, 122.7, 117.6, 60.5, 49.5, 35.3, 25.0, 19.7, 14.4. HRMS (m/z, ESI-TOF): Calcd for C<sub>34</sub>H<sub>33</sub>ClN<sub>2</sub>O<sub>5</sub>SNa<sup>+</sup> [M+Na<sup>+</sup>] 639.1691, found 639.1688.

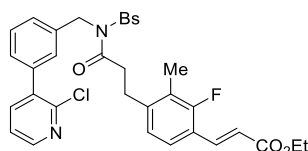

**Ethyl (*E*)-3-(4-(3-(*N*-(3-(2-chloropyridin-3-yl)benzyl)phenylsulfonamido)-3-oxo-propyl)-2-fluoro-3-methylphenyl)acrylate (**3l**)**

The general procedure **A** was followed (75 °C under air). Conversion: 85 %. Yield: 43.4

mg (70%), *p*: others > 20:1.

<sup>1</sup>H NMR (400 MHz, Chloroform-*d*) δ 8.39 (dd, *J* = 4.8, 1.9 Hz, 1H), 7.74 (d, *J* = 16.2 Hz, 1H), 7.70 – 7.66 (m, 2H), 7.64 – 7.56 (m, 2H), 7.47 – 7.39 (m, 6H), 7.31 (dd, *J* = 7.5, 4.7 Hz, 1H), 7.15 (t, *J* = 7.7 Hz, 1H), 6.70 (d, *J* = 8.0 Hz, 1H), 6.44 (d, *J* = 16.1 Hz, 1H), 5.15 (s, 2H), 4.26 (q, *J* = 7.1 Hz, 2H), 2.86 (s, 4H), 2.02 (d, *J* = 2.4 Hz, 3H), 1.33 (t, *J* = 7.1 Hz, 3H). <sup>13</sup>C NMR (101 MHz, Chloroform-*d*) δ 172.1, 167.1, 159.7 (d, *J*<sub>C-F</sub> = 252.0 Hz), 149.6, 148.7, 143.1 (d, *J*<sub>C-F</sub> = 4.6 Hz), 139.8, 139.5, 137.9, 137.6 (d, *J*<sub>C-F</sub> = 3.6 Hz), 136.9, 136.5, 134.0, 129.4, 128.98, 128.97, 128.9, 128.1, 127.5, 125.8 (d, *J*<sub>C-F</sub> = Hz), 124.4 (d, *J*<sub>C-F</sub> = 3.7 Hz), 124.0 (d, *J*<sub>C-F</sub> = 16.6 Hz), 122.7, 120.4 (d, *J*<sub>C-F</sub> = 13.5 Hz), 120.0 (d, *J*<sub>C-F</sub> = 6.4 Hz), 60.7, 49.4, 36.5, 28.0 (d, *J*<sub>C-F</sub> = 2.6 Hz), 14.4, 10.4 (d, *J*<sub>C-F</sub> = 7.0 Hz). HRMS (*m/z*, ESI-TOF): Calcd for C<sub>33</sub>H<sub>30</sub>ClFN<sub>2</sub>O<sub>5</sub>SNa<sup>+</sup> [*M*+Na<sup>+</sup>] 643.1440, found 643.1440.

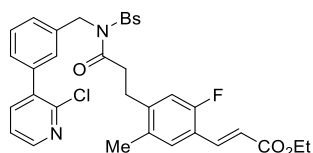

**Ethyl (*E*)-3-(4-(3-(*N*-(3-(2-chloropyridin-3-yl)benzyl)phenylsulfonamido)-3-oxo-propyl)-2-fluoro-5-methylphenyl)acrylate (3m)**

The general procedure **A** was followed (75 °C under air). Conversion: 80 %. Yield: 43.4 mg (70%), *p*: others > 20:1.

<sup>1</sup>H NMR (400 MHz, Chloroform-*d*) δ 8.38 (dd, *J* = 4.7, 1.9 Hz, 1H), 7.74 – 7.65 (m, 3H), 7.65 – 7.57 (m, 2H), 7.46 (t, *J* = 7.8 Hz, 2H), 7.42 – 7.40 (m, 4H), 7.30 (dd, *J* = 7.5, 4.8 Hz, 1H), 7.19 (d, *J* = 7.4 Hz, 1H), 6.57 (d, *J* = 11.4 Hz, 1H), 6.45 (d, *J* = 16.2 Hz, 1H), 5.16 (s, 2H), 4.25 (q, *J* = 7.1 Hz, 2H), 2.89 – 2.79 (m, 4H), 2.10 (s, 3H), 1.33 (t, *J* = 7.1 Hz, 3H). <sup>13</sup>C NMR (101 MHz, Chloroform-*d*) δ 172.0, 167.0, 159.7 (d, *J*<sub>C-F</sub> = 252.0 Hz), 149.6, 148.6, 142.8 (d, *J*<sub>C-F</sub> = 7.5 Hz), 139.7, 139.5, 137.9, 137.2 (d, *J*<sub>C-F</sub> = 2.2 Hz), 136.9, 136.5, 134.1, 132.2 (d, *J*<sub>C-F</sub> = 3.2 Hz), 130.5 (d, *J*<sub>C-F</sub> = 3.2 Hz), 129.4, 129.0, 128.9, 128.1, 127.6, 122.7, 120.2 (d, *J*<sub>C-F</sub> = 11.8 Hz), 120.1 (d, *J*<sub>C-F</sub> = 6.8 Hz), 115.8 (d, *J*<sub>C-F</sub> = 22.0 Hz), 60.6, 49.4, 36.1, 27.8, 18.6, 14.4. HRMS (*m/z*, ESI-TOF): Calcd for C<sub>33</sub>H<sub>30</sub>ClFN<sub>2</sub>O<sub>5</sub>SNa<sup>+</sup> [*M*+Na<sup>+</sup>] 643.1440, found 643.1439.

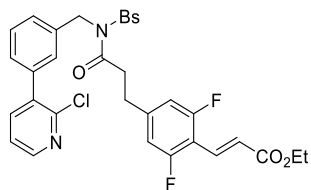

**Ethyl (*E*)-3-(4-(3-(*N*-(3-(2-chloropyridin-3-yl)benzyl)phenylsulfonamido)-3-oxopropyl)-2,6-difluorophenyl)acrylate (**3n**)**

The general procedure **A** was followed (75 °C under air). Conversion: 84 %. Yield: 45.6 mg (73%), *p*: others > 20:1.

<sup>1</sup>H NMR (400 MHz, Chloroform-*d*) δ 8.39 (dd, *J* = 4.8, 1.9 Hz, 1H), 7.72 – 7.64 (m, 3H), 7.64 – 7.57 (m, 2H), 7.46 (t, *J* = 7.9 Hz, 2H), 7.43 – 7.37 (m, 4H), 7.30 (dd, *J* = 7.5, 4.8 Hz, 1H), 6.65 (d, *J* = 16.5 Hz, 1H), 6.53 (d, *J* = 9.6 Hz, 2H), 5.14 (s, 2H), 4.26 (q, *J* = 7.1 Hz, 2H), 2.97 – 2.89 (m, 2H), 2.86 – 2.83 (m, 2H), 1.33 (t, *J* = 7.1 Hz, 3H). <sup>13</sup>C NMR (101 MHz, Chloroform-*d*) δ 171.6, 167.1, 161.5 (dd, *J*<sub>C-F</sub> = 255.5, 7.7 Hz), 149.6, 148.7, 145.0 (t, *J*<sub>C-F</sub> = 10.2 Hz), 139.7, 139.5, 137.9, 136.8, 136.5, 134.2, 130.6, 129.5, 129.1, 129.0, 128.9, 128.2, 127.5, 123.7 (t, *J*<sub>C-F</sub> = 8.5 Hz), 122.7, 111.8 (dd, *J*<sub>C-F</sub> = 25.4, 14.2 Hz), 110.4 (t, *J*<sub>C-F</sub> = 15.2 Hz), 60.8, 49.4, 37.1, 30.2, 14.4. HRMS (*m/z*, ESI-TOF): Calcd for C<sub>32</sub>H<sub>27</sub>ClF<sub>2</sub>N<sub>2</sub>O<sub>5</sub>SNa<sup>+</sup> [*M*+Na<sup>+</sup>] 647.1189, found 647.1186.

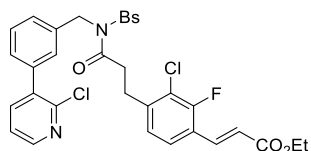

**Ethyl (*E*)-3-(3-chloro-4-(3-(*N*-(3-(2-chloropyridin-3-yl)benzyl)phenylsulfonamido)-3-oxopropyl)-2-fluorophenyl)acrylate (**3o**)**

The general procedure **B** was followed (**2** (2.0 equiv), HFIP (1.5 mL), 90 °C). Conversion: 70 %. Yield: 35.2 mg (55%), *p*: others = 15:1.

<sup>1</sup>H NMR (400 MHz, Chloroform-*d*) δ 8.40 (dd, *J* = 4.8, 1.9 Hz, 1H), 7.74 – 7.66 (m, 3H), 7.64 – 7.55 (m, 2H), 7.49 – 7.36 (m, 6H), 7.31 (dd, *J* = 7.5, 4.8 Hz, 1H), 7.21 (t, *J* = 7.5 Hz, 1H), 6.89 (dd, *J* = 8.1, 1.3 Hz, 1H), 6.47 (d, *J* = 16.2 Hz, 1H), 5.15 (s, 2H), 4.27 (q, *J* = 7.1 Hz, 2H), 3.02 – 2.98 (m, 2H), 2.96 – 2.94 (m, 2H), 1.34 (t, *J* = 7.1 Hz, 3H). <sup>13</sup>C NMR (101 MHz, Chloroform-*d*) δ 171.8, 166.6, 156.7 (d, *J*<sub>C-F</sub> = 255.6 Hz), 149.7, 148.7, 142.0, 139.8, 139.5, 137.9, 136.9, 136.6, 136.2 (d, *J*<sub>C-F</sub> = 2.3 Hz), 134.0, 129.4, 129.03, 128.97, 128.8, 128.2, 127.6, 126.4 (d, *J*<sub>C-F</sub> = 3.3 Hz), 125.7 (d, *J*<sub>C-F</sub> = 3.8 Hz), 122.7, 122.1 (d, *J*<sub>C-F</sub> = 12.3 Hz), 121.9 (d, *J*<sub>C-F</sub> = 17.8 Hz), 121.6 (d, *J*<sub>C-F</sub> = 6.4



Hz), 60.9, 49.4, 35.8, 28.7 (d,  $J_{C-F} = 2.4$  Hz), 14.4. HRMS (m/z, ESI-TOF): Calcd for  $C_{32}H_{27}Cl_2FN_2O_5SNa^+$  [ $M+Na^+$ ] 663.0894, found 663.0894.

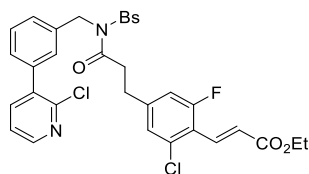

**Ethyl (*E*)-3-(2-chloro-4-(3-(*N*-(3-(2-chloropyridin-3-yl)benzyl)phenylsulfonamid-oxo-3-oxopropyl)-6-fluorophenyl)acrylate (3p)**

The general procedure **B** was followed (**2** (2.0 equiv), HFIP (1.5 mL), 90 °C). Conversion: 68 %. Yield: 36.5 mg (57%), *p*: others > 20:1.

$^1H$  NMR (400 MHz, Chloroform-*d*)  $\delta$  8.39 (dd,  $J = 4.8, 1.9$  Hz, 1H), 7.82 (d,  $J = 16.4$  Hz, 1H), 7.71 – 7.66 (m, 2H), 7.61 (td,  $J = 7.7, 1.8$  Hz, 2H), 7.46 (t,  $J = 7.8$  Hz, 2H), 7.42 – 7.37 (m, 4H), 7.31 (dd,  $J = 7.5, 4.8$  Hz, 1H), 6.87 (s, 1H), 6.64 (d,  $J = 16.0$  Hz, 1H), 6.64 (d,  $J = 10.6$  Hz, 1H), 5.14 (s, 2H), 4.28 (q,  $J = 7.1$  Hz, 2H), 2.93 (t,  $J = 7.1$  Hz, 2H), 2.84 (t,  $J = 6.6$  Hz, 3H), 1.34 (t,  $J = 7.1$  Hz, 3H).  $^{13}C$  NMR (101 MHz, Chloroform-*d*)  $\delta$  171.6, 167.0, 161.9 (d,  $J_{C-F} = 256.7$  Hz), 149.7, 148.7, 144.3 (d,  $J_{C-F} = 9.8$  Hz), 139.8, 139.5, 138.0, 136.8, 136.6, 135.9 (d,  $J_{C-F} = 6.0$  Hz), 134.6 (d,  $J_{C-F} = 2.2$  Hz), 134.2, 129.5, 129.1, 129.1, 128.9, 128.2, 127.5, 125.0 (d,  $J_{C-F} = 2.9$  Hz), 124.8 (d,  $J_{C-F} = 14.6$  Hz), 122.7, 119.6 (d,  $J_{C-F} = 14.2$  Hz), 114.9 (d,  $J_{C-F} = 23.5$  Hz), 60.0, 49.4, 37.2, 29.9, 14.4. HRMS (m/z, ESI-TOF): Calcd for  $C_{32}H_{27}Cl_2FN_2O_5SNa^+$  [ $M+Na^+$ ] 663.0894, found 663.0888.

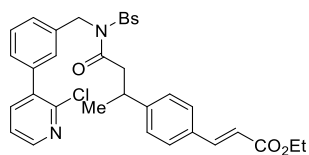

**Ethyl (*E*)-3-(4-(4-(*N*-(3-(2-chloropyridin-3-yl)benzyl)phenylsulfonamido)-4-oxobutan-2-yl)phenyl)acrylate (3q)**

The general procedure **A** was followed (75 °C under air). Conversion: 80 %. Yield: 42.1 mg (70%), *p*: others > 20:1.

$^1H$  NMR (400 MHz, Chloroform-*d*)  $\delta$  8.39 (dd,  $J = 4.8, 1.9$  Hz, 1H), 7.70 – 7.64 (m, 2H), 7.64 – 7.56 (m, 3H), 7.46 (t,  $J = 7.9$  Hz, 2H), 7.41 – 7.24 (m, 7H), 6.97 (d,  $J = 7.9$  Hz, 2H), 6.36 (d,  $J = 16.0$  Hz, 1H), 5.14 – 5.02 (m, 2H), 4.26 (q,  $J = 7.1$  Hz, 2H), 3.34

(h,  $J = 7.0$  Hz, 1H), 2.98 (dd,  $J = 16.7, 7.5$  Hz, 1H), 2.84 (dd,  $J = 16.7, 6.7$  Hz, 1H), 1.34 (t,  $J = 7.1$  Hz, 3H), 1.12 (d,  $J = 7.0$  Hz, 3H).  $^{13}\text{C}$  NMR (101 MHz, Chloroform-*d*)  $\delta$  171.7, 167.2, 149.6, 148.6, 148.0, 144.3, 139.7, 139.7, 137.8, 137.0, 136.6, 133.9, 132.6, 129.4, 129.0, 128.9, 128.8, 128.3, 128.1, 127.6, 127.4, 122.7, 117.8, 60.6, 49.1, 44.4, 36.0, 21.7, 14.4. HRMS ( $m/z$ , ESI-TOF): Calcd for  $\text{C}_{33}\text{H}_{31}\text{ClN}_2\text{O}_5\text{SNa}^+$  [ $\text{M}+\text{Na}^+$ ] 625.1534, found 625.1534.

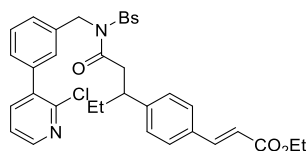

**Ethyl (*E*)-3-(4-(1-(*N*-(3-(2-chloropyridin-3-yl)benzyl)phenylsulfonamido)-1-oxo-pentan-3-yl)phenyl)acrylate (3r)**

The general procedure A was followed (75 °C under air). Conversion: 75 %. Yield: 41.3 mg (67%), *p*: others > 20:1.

$^1\text{H}$  NMR (400 MHz, Chloroform-*d*)  $\delta$  8.39 (dd,  $J = 4.8, 2.0$  Hz, 1H), 7.68 – 7.55 (m, 5H), 7.45 (t,  $J = 7.8$  Hz, 2H), 7.38 – 7.25 (m, 6H), 7.20 (d,  $J = 7.4$  Hz, 1H), 6.90 (d,  $J = 8.0$  Hz, 2H), 6.36 (d,  $J = 16.0$  Hz, 1H), 5.12 – 5.00 (m, 2H), 4.26 (q,  $J = 7.1$  Hz, 2H), 3.11 – 3.04 (m, 1H), 2.98 (dd,  $J = 16.6, 8.4$  Hz, 1H), 2.88 (dd,  $J = 16.6, 5.7$  Hz, 1H), 1.59 – 1.52 (m, 1H), 1.48 – 1.37 (m, 1H), 1.34 (t,  $J = 7.1$  Hz, 3H), 0.67 (t,  $J = 7.3$  Hz, 3H).  $^{13}\text{C}$  NMR (101 MHz, Chloroform-*d*)  $\delta$  171.8, 167.2, 149.7, 148.6, 146.4, 144.4, 139.74, 139.73, 137.8, 137.0, 136.6, 133.9, 132.6, 129.4, 129.0, 128.8, 128.7, 128.2, 128.08, 128.06, 127.6, 122.7, 117.7, 60.6, 49.0, 43.3, 43.0, 28.9, 14.4, 11.9. HRMS ( $m/z$ , ESI-TOF): Calcd for  $\text{C}_{34}\text{H}_{33}\text{ClN}_2\text{O}_5\text{SNa}^+$  [ $\text{M}+\text{Na}^+$ ] 639.1691, found 639.1692.

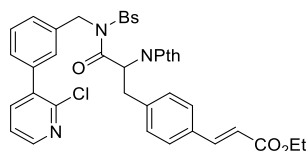

**Ethyl (*E*)-3-(4-(3-(*N*-(3-(2-chloropyridin-3-yl)benzyl)phenylsulfonamido)-2-(1,3-dioxoisoindolin-2-yl)-3-oxopropyl)phenyl)acrylate (3s)**

The general procedure A was followed (75 °C under air). Conversion: 50 %. Yield: 30.8 mg (42%), *p*: others = 9:1.

$^1\text{H}$  NMR (400 MHz, Chloroform-*d*)  $\delta$  8.38 (dd,  $J = 4.9, 1.9$  Hz, 1H), 7.98 (dd,  $J = 7.4, 1.8$  Hz, 2H), 7.70 – 7.58 (m, 6H), 7.57 – 7.48 (m, 3H), 7.38 – 7.27 (m, 7H), 7.23 (d,  $J$

= 8.1 Hz, 2H), 6.31 (d,  $J = 16.0$  Hz, 1H), 6.03 (dd,  $J = 11.0, 4.7$  Hz, 1H), 5.02 – 4.88 (m, 2H), 4.22 (q,  $J = 7.1$  Hz, 2H), 3.75 (dd,  $J = 13.9, 11.0$  Hz, 1H), 3.58 (dd,  $J = 13.9, 4.7$  Hz, 1H), 1.30 (t,  $J = 7.0$  Hz, 3H).  $^{13}\text{C}$  NMR (101 MHz, Chloroform-*d*)  $\delta$  170.0, 167.9, 167.1, 149.7, 148.6, 144.2, 139.8, 139.0, 138.5, 137.7, 136.5, 135.9, 134.3, 133.2, 131.4, 129.7, 129.5, 128.8, 128.7, 128.6, 128.4, 128.1, 127.6, 123.6, 122.7, 118.1, 60.6, 56.5, 50.0, 34.8, 14.4. HRMS ( $m/z$ , ESI-TOF): Calcd for  $\text{C}_{40}\text{H}_{32}\text{ClN}_3\text{O}_7\text{SNa}^+$  [ $\text{M}+\text{Na}^+$ ] 756.1542, found 756.1540.

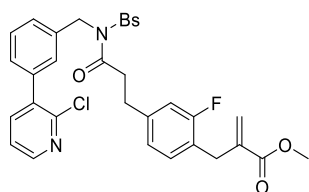

**Methyl 2-(4-(3-(*N*-(3-(2-chloropyridin-3-yl)benzyl)phenylsulfonamido)-3-oxo-propyl)-2-fluorobenzyl)acrylate (3ha<sub>1</sub>)**

The general procedure **A** was followed (75 °C under air). Conversion: 80 %. Yield: 30.9 mg (51%), *p*: others > 20:1.

$^1\text{H}$  NMR (400 MHz, Chloroform-*d*)  $\delta$  8.40 (dd,  $J = 4.8, 1.9$  Hz, 1H), 7.73 – 7.67 (m, 2H), 7.65 – 7.57 (m, 2H), 7.46 (t,  $J = 7.9$  Hz, 2H), 7.41 (dd,  $J = 8.8, 1.6$  Hz, 4H), 7.31 (dd,  $J = 7.6, 4.7$  Hz, 1H), 7.00 (t,  $J = 7.8$  Hz, 1H), 6.71 (dd,  $J = 7.7, 1.7$  Hz, 1H), 6.63 (dd,  $J = 10.7, 1.7$  Hz, 1H), 6.22 (s, 1H), 5.41 (s, 1H), 5.14 (s, 2H), 3.74 (s, 3H), 3.58 (s, 2H), 2.94 – 2.87 (m, 2H), 2.84 – 2.80 (m, 2H).  $^{13}\text{C}$  NMR (101 MHz, Chloroform-*d*)  $\delta$  172.2, 167.3, 161.0 (d,  $J_{\text{C-F}} = 246.5$  Hz), 149.7, 148.6, 141.0 (d,  $J_{\text{C-F}} = 7.4$  Hz), 139.8, 139.6, 138.5, 137.9, 137.0, 136.6, 134.0, 131.3 (d,  $J_{\text{C-F}} = 4.9$  Hz), 129.4, 129.01, 128.95, 128.8, 128.1, 127.6, 126.5, 124.0 (d,  $J_{\text{C-F}} = 3.2$  Hz), 123.5 (d,  $J_{\text{C-F}} = 15.8$  Hz), 122.7, 115.2 (d,  $J_{\text{C-F}} = 22.1$  Hz), 52.1, 49.3, 37.8, 30.9 (d,  $J_{\text{C-F}} = 2.9$  Hz), 30.1. HRMS ( $m/z$ , ESI-TOF): Calcd for  $\text{C}_{32}\text{H}_{28}\text{ClFN}_2\text{O}_5\text{SNa}^+$  [ $\text{M}+\text{Na}^+$ ] 629.1284, found 629.1283.

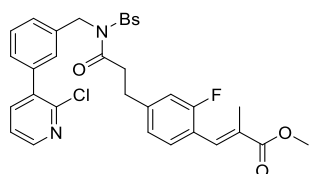

**Methyl (*E*)-3-(4-(3-(*N*-(3-(2-chloropyridin-3-yl)benzyl)phenylsulfonamido)-3-oxo-propyl)-2-fluorophenyl)-2-methylacrylate (3ha<sub>2</sub>)**

The general procedure **A** was followed (75 °C under air). Conversion: 80 %. Yield: 13.3 mg (22%), *p*: others > 20:1.

<sup>1</sup>H NMR (400 MHz, Chloroform-*d*) δ 8.40 (dd, *J* = 4.8, 2.0 Hz, 1H), 7.74 – 7.69 (m, 2H), 7.66 – 7.58 (m, 3H), 7.47 (t, *J* = 7.9 Hz, 2H), 7.43 – 7.37 (m, 4H), 7.31 (dd, *J* = 7.6, 4.8 Hz, 1H), 7.17 (t, *J* = 7.8 Hz, 1H), 6.81 (dd, *J* = 8.0, 1.7 Hz, 1H), 6.69 (dd, *J* = 11.0, 1.7 Hz, 1H), 5.15 (s, 2H), 3.82 (s, 3H), 2.96 – 2.92 (m, 2H), 2.89 – 2.85 (m, 2H), 2.01 (s, 3H). <sup>13</sup>C NMR (101 MHz, Chloroform-*d*) δ 172.1, 168.7, 160.3 (d, *J*<sub>C-F</sub> = 250.3 Hz), 149.7, 148.7, 143.3 (d, *J*<sub>C-F</sub> = 7.9 Hz), 139.8, 139.6, 138.0, 136.9, 136.6, 134.1, 131.5 (d, *J*<sub>C-F</sub> = 3.4 Hz), 130.5 (d, *J*<sub>C-F</sub> = 3.3 Hz), 130.4, 129.4, 129.1, 129.0, 128.9, 128.2, 127.7, 123.9 (d, *J*<sub>C-F</sub> = 3.1 Hz), 122.7, 121.7 (d, *J*<sub>C-F</sub> = 13.8 Hz), 115.5 (d, *J*<sub>C-F</sub> = 22.0 Hz), 52.3, 49.4, 37.6, 30.2, 14.5. HRMS (*m/z*, ESI-TOF): Calcd for C<sub>32</sub>H<sub>28</sub>ClFN<sub>2</sub>O<sub>5</sub>SNa<sup>+</sup> [*M*+Na<sup>+</sup>] 629.1284, found 629.1280.

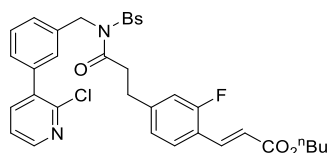

**Butyl (*E*)-3-(4-(3-(*N*-(3-(2-chloropyridin-3-yl)benzyl)phenylsulfonamido)-3-oxo - propyl)-2-fluorophenyl)acrylate (**3hb**)**

The general procedure **A** was followed (75 °C under air). Conversion: 80 %. Yield: 43.1 mg (68%), *p*: others > 20:1.

<sup>1</sup>H NMR (400 MHz, Chloroform-*d*) δ 8.39 (dd, *J* = 4.8, 1.9 Hz, 1H), 7.74 – 7.65 (m, 3H), 7.64 – 7.57 (m, 2H), 7.45 (t, *J* = 7.8 Hz, 2H), 7.40 – 7.35 (m, 4H), 7.34 – 7.27 (m, 2H), 6.79 (dd, *J* = 8.1, 1.7 Hz, 1H), 6.68 (dd, *J* = 11.5, 1.7 Hz, 1H), 6.46 (d, *J* = 16.2 Hz, 1H), 5.13 (s, 2H), 4.21 (t, *J* = 6.7 Hz, 2H), 2.95 – 2.91 (m, 2H), 2.88 – 2.84 (m, 2H), 1.74 – 1.63 (m, 2H), 1.50 – 1.37 (m, 2H), 0.96 (t, *J* = 7.4 Hz, 3H). <sup>13</sup>C NMR (101 MHz, Chloroform-*d*) δ 171.9, 167.1, 161.2 (d, *J*<sub>C-F</sub> = 254.3 Hz), 149.6, 148.6, 145.0 (d, *J*<sub>C-F</sub> = 8.2 Hz), 139.8, 139.5, 137.9, 137.0 (d, *J*<sub>C-F</sub> = 2.5 Hz), 136.8, 136.5, 134.0, 129.4, 129.1 (d, *J*<sub>C-F</sub> = 3.4 Hz), 129.02, 128.96, 128.8, 128.1, 127.6, 124.6 (d, *J*<sub>C-F</sub> = 3.2 Hz), 122.7, 120.5 (d, *J*<sub>C-F</sub> = 11.8 Hz), 120.3 (d, *J*<sub>C-F</sub> = 6.5 Hz), 116.0 (d, *J*<sub>C-F</sub> = 21.8 Hz), 64.6, 49.3, 37.4, 30.8, 30.2, 19.3, 13.8. HRMS (*m/z*, ESI-TOF): Calcd for C<sub>34</sub>H<sub>32</sub>ClFN<sub>2</sub>O<sub>5</sub>SNa<sup>+</sup> [*M*+Na<sup>+</sup>] 657.1597, found 657.1599.

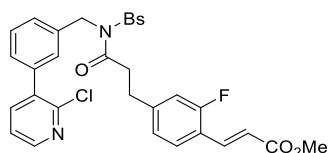

**Methyl (*E*)-3-(4-(3-(*N*-(3-(2-chloropyridin-3-yl)benzyl)phenylsulfonamido)-3-oxo-propyl)-2-fluorophenyl)acrylate (3hc)**

The general procedure **A** was followed (75 °C under air). Conversion: 87 %. Yield: 43.2 mg (73%), *p*: others > 20:1.

<sup>1</sup>H NMR (400 MHz, Chloroform-*d*) δ 8.39 (dd, *J* = 4.8, 1.9 Hz, 1H), 7.72 (d, *J* = 16.2 Hz, 1H), 7.70 – 7.65 (m, 2H), 7.60 (td, *J* = 7.7, 1.6 Hz, 2H), 7.45 (t, *J* = 7.8 Hz, 2H), 7.42 – 7.35 (m, 4H), 7.33 – 7.28 (m, 2H), 6.79 (dd, *J* = 8.0, 1.7 Hz, 1H), 6.68 (dd, *J* = 11.5, 1.7 Hz, 1H), 6.46 (d, *J* = 16.2 Hz, 1H), 5.13 (s, 2H), 3.80 (s, 3H), 2.95 – 2.91 (m, 2H), 2.88 – 2.84 (m, 2H). <sup>13</sup>C NMR (101 MHz, Chloroform-*d*) δ 171.9, 167.4, 161.2 (d, *J*<sub>C-F</sub> = 254.4 Hz), 149.6, 148.7, 145.1 (d, *J*<sub>C-F</sub> = 8.1 Hz), 139.7, 139.5, 137.9, 137.3 (d, *J*<sub>C-F</sub> = 2.5 Hz), 136.8, 136.5, 134.0, 129.4, 129.1 (d, *J*<sub>C-F</sub> = 3.4 Hz), 129.02, 128.97, 128.8, 128.1, 127.6, 124.6 (d, *J*<sub>C-F</sub> = 3.2 Hz), 122.7, 120.4 (d, *J*<sub>C-F</sub> = 11.7 Hz), 119.8 (d, *J*<sub>C-F</sub> = 6.6 Hz), 116.0 (d, *J*<sub>C-F</sub> = 21.9 Hz), 51.9, 49.3, 37.4, 30.2. HRMS (*m/z*, ESI-TOF): Calcd for C<sub>31</sub>H<sub>26</sub>ClFN<sub>2</sub>O<sub>5</sub>SNa<sup>+</sup> [*M*+Na<sup>+</sup>] 615.1127, found 615.1128.

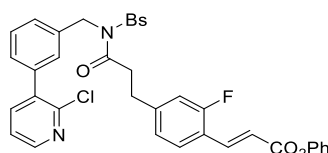

**Phenyl (*E*)-3-(4-(3-(*N*-(3-(2-chloropyridin-3-yl)benzyl)phenylsulfonamido)-3-oxo-propyl)-2-fluorophenyl)acrylate (3hd)**

The general procedure **A** was followed (75 °C under air). Conversion: 74 %. Yield: 39.2 mg (60%), *p*: others > 20:1.

<sup>1</sup>H NMR (400 MHz, Chloroform-*d*) δ 8.40 (dd, *J* = 4.8, 1.9 Hz, 1H), 7.90 (d, *J* = 16.2 Hz, 1H), 7.74 – 7.68 (m, 2H), 7.65 – 7.58 (m, 2H), 7.47 (t, *J* = 7.8 Hz, 2H), 7.44 – 7.35 (m, 7H), 7.31 (dd, *J* = 7.5, 4.8 Hz, 1H), 7.28 – 7.22 (m, 1H), 7.20 – 7.15 (m, 2H), 6.84 (dd, *J* = 8.0, 1.7 Hz, 1H), 6.73 (dd, *J* = 11.5, 1.6 Hz, 1H), 6.67 (d, *J* = 16.2 Hz, 1H), 5.15 (s, 2H), 2.98 – 2.94 (m, 2H), 2.91 – 2.98 (m, 2H). <sup>13</sup>C NMR (101 MHz, Chloroform-*d*) δ 171.9, 165.4, 161.4 (d, *J*<sub>C-F</sub> = 254.9 Hz), 150.8, 149.6, 148.7, 145.6 (d, *J*<sub>C-F</sub> = 8.2 Hz), 139.8, 139.5, 139.0 (d, *J*<sub>C-F</sub> = 2.4 Hz), 137.9, 136.8, 136.6, 134.1, 129.6, 129.43, 129.41, 129.03, 128.99, 128.8, 128.1, 127.6, 125.9, 124.7 (d, *J*<sub>C-F</sub> = 3.1 Hz),

122.7, 121.7, 120.3 (d,  $J_{C-F} = 11.7$  Hz), 119.4 (d,  $J_{C-F} = 6.8$  Hz), 116.1 (d,  $J_{C-F} = 21.9$  Hz), 49.34, 37.40, 30.27. HRMS (m/z, ESI-TOF): Calcd for  $C_{36}H_{28}ClFN_2O_5SNa^+$   $[M+Na^+]$  677.1284, found 677.1278.

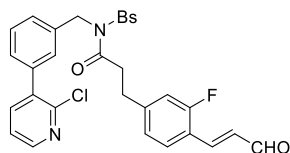

**(E)-N-(3-(2-chloropyridin-3-yl)benzyl)-3-(3-fluoro-4-(3-oxoprop-1-en-1-yl)phenyl)-N-(phenylsulfonyl)propanamide (3he)**

The general procedure A was followed (75 °C under air). Conversion: 72 %. Yield: 36.5 mg (65%), *p*: others > 20:1.

$^1H$  NMR (400 MHz, Chloroform-*d*)  $\delta$  9.69 (d,  $J = 7.7$  Hz, 1H), 8.39 (dd,  $J = 4.8, 2.0$  Hz, 1H), 7.71 – 7.67 (m, 2H), 7.64 – 7.58 (m, 2H), 7.56 (d,  $J = 16.2$  Hz, 1H), 7.46 (t,  $J = 7.9$  Hz, 2H), 7.42 – 7.34 (m, 5H), 7.31 (dd,  $J = 7.5, 4.8$  Hz, 1H), 6.85 (dd,  $J = 8.0, 1.7$  Hz, 1H), 6.77 – 6.67 (m, 2H), 5.14 (s, 2H), 2.98 – 2.93 (m, 2H), 2.91 – 2.87 (m, 2H).  $^{13}C$  NMR (101 MHz, Chloroform-*d*)  $\delta$  193.9, 171.8, 161.2 (d,  $J_{C-F} = 255.5$  Hz), 149.7, 148.7, 146.5 (d,  $J_{C-F} = 8.3$  Hz), 144.7 (d,  $J_{C-F} = 3.3$  Hz), 139.8, 139.5, 138.0, 136.8, 136.6, 134.1, 130.1 (d,  $J_{C-F} = 5.4$  Hz), 129.4, 129.1, 129.0, 128.93 (d,  $J_{C-F} = 3.0$  Hz), 128.86, 128.2, 127.6, 124.8 (d,  $J_{C-F} = 3.0$  Hz), 122.7, 120.2 (d,  $J_{C-F} = 11.7$  Hz), 116.2 (d,  $J_{C-F} = 21.7$  Hz), 49.4, 37.4, 30.4 (d,  $J_{C-F} = 1.5$  Hz). HRMS (m/z, ESI-TOF): Calcd for  $C_{30}H_{24}ClFN_2O_4SNa^+$   $[M+Na^+]$  585.1022, found 585.1019.

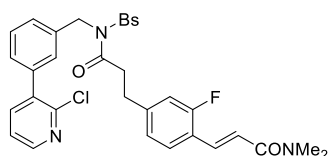

**(E)-3-(4-(3-(N-(3-(2-chloropyridin-3-yl)benzyl)phenylsulfonamido)-3-oxopropyl)-2-fluorophenyl)-N,N-dimethylacrylamide (3hf)**

The general procedure A was followed (75 °C under air). Conversion: 80 %. Yield: 42.3 mg (70%), *p*: others > 20:1.

$^1H$  NMR (400 MHz, Chloroform-*d*)  $\delta$  8.38 (dd,  $J = 4.8, 1.9$  Hz, 1H), 7.70 – 7.55 (m, 5H), 7.44 (t,  $J = 7.9$  Hz, 2H), 7.41 – 7.34 (m, 4H), 7.32 – 7.27 (m, 2H), 6.95 (d,  $J = 15.6$  Hz, 1H), 6.77 (dd,  $J = 8.0, 1.7$  Hz, 1H), 6.66 (dd,  $J = 11.7, 1.7$  Hz, 1H), 5.13 (s, 2H), 3.15 (s, 3H), 3.06 (s, 3H), 2.94 – 2.90 (m, 2H), 2.87 – 2.83 (m, 2H).  $^{13}C$  NMR

(101 MHz, Chloroform-*d*)  $\delta$  172.0, 166.8, 161.2 (d,  $J_{C-F}$  = 253.5 Hz), 149.6, 148.6, 144.0 (d,  $J_{C-F}$  = 8.1 Hz), 139.8, 139.5, 137.9, 136.9, 136.6, 135.2, 134.0, 129.8 (d,  $J_{C-F}$  = 3.9 Hz), 129.4, 129.01, 128.96, 128.8, 128.1, 127.6, 124.4 (d,  $J_{C-F}$  = 3.2 Hz), 122.7, 121.4 (d,  $J_{C-F}$  = 11.8 Hz), 120.0 (d,  $J_{C-F}$  = 7.9 Hz), 116.0 (d,  $J_{C-F}$  = 22.1 Hz), 49.3, 37.5, 36.0, 30.2. HRMS (m/z, ESI-TOF): Calcd for C<sub>32</sub>H<sub>29</sub>ClFN<sub>3</sub>O<sub>4</sub>SNa<sup>+</sup> [M+Na<sup>+</sup>] 628.1444, found 628.1444.

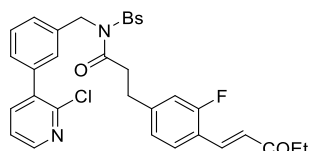

**(E)-N-(3-(2-chloropyridin-3-yl)benzyl)-3-(3-fluoro-4-(3-oxopent-1-en-1-yl)phenyl)-N-(phenylsulfonyl)propanamide (3hg)**

The general procedure **B** was followed (**2** (2.0 equiv), HFIP (1.5 mL), 90 °C). Conversion: 76 %. Yield: 36.6 mg (62%), *p*: others > 20:1.

<sup>1</sup>H NMR (400 MHz, Chloroform-*d*)  $\delta$  8.39 (dd,  $J$  = 4.8, 1.9 Hz, 1H), 7.72 – 7.65 (m, 2H), 7.65 – 7.56 (m, 3H), 7.45 (t,  $J$  = 7.9 Hz, 2H), 7.41 – 7.37 (m, 4H), 7.36 – 7.28 (m, 2H), 6.79 (dd,  $J$  = 8.0, 1.7 Hz, 1H), 6.74 (d,  $J$  = 16.4 Hz, 1H), 6.69 (dd,  $J$  = 11.5, 1.7 Hz, 1H), 5.13 (s, 2H), 2.95 – 2.91 (m, 2H), 2.89 – 2.85 (m, 2H), 2.70 (q,  $J$  = 7.3 Hz, 2H), 1.16 (t,  $J$  = 7.3 Hz, 3H). <sup>13</sup>C NMR (101 MHz, Chloroform-*d*)  $\delta$  201.1, 171.9, 161.4 (d,  $J_{C-F}$  = 254.1 Hz), 149.6, 148.7, 145.2 (d,  $J_{C-F}$  = 8.1 Hz), 139.8, 139.5, 137.9, 136.9, 136.6, 134.5 (d,  $J_{C-F}$  = 2.7 Hz), 134.7, 129.4, 129.0, 129.0, 128.9, 128.8, 128.2, 127.8 (d,  $J_{C-F}$  = 5.8 Hz), 127.6, 124.6 (d,  $J_{C-F}$  = 3.1 Hz), 122.7, 120.7 (d,  $J_{C-F}$  = 11.8 Hz), 116.0 (d,  $J_{C-F}$  = 22.0 Hz), 49.3, 37.4, 34.1, 30.2, 8.3. HRMS (m/z, ESI-TOF): Calcd for C<sub>32</sub>H<sub>28</sub>ClFN<sub>2</sub>O<sub>4</sub>SNa<sup>+</sup> [M+Na<sup>+</sup>] 613.1335, found 613.1340.

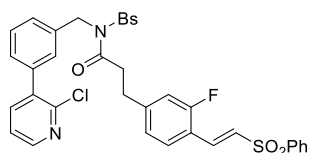

**(E)-N-(3-(2-chloropyridin-3-yl)benzyl)-3-(3-fluoro-4-(2-(phenylsulfonyl)vinyl)phenyl)-N-(phenylsulfonyl)propanamide (3hh)**

The general procedure **A** was followed (75 °C under air). Conversion: 55 %. Yield: 30.3 mg (45%), *p*: others > 20:1.

$^1\text{H}$  NMR (400 MHz, Chloroform-*d*)  $\delta$  8.38 (dd,  $J = 4.8, 1.9$  Hz, 1H), 7.97 – 7.91 (m, 2H), 7.71 – 7.63 (m, 3H), 7.63 – 7.51 (m, 5H), 7.45 (t,  $J = 7.7$  Hz, 2H), 7.38 (d,  $J = 5.5$  Hz, 4H), 7.30 (dd,  $J = 7.6, 4.8$  Hz, 1H), 7.23 (t,  $J = 7.8$  Hz, 1H), 6.94 (d,  $J = 15.5$  Hz, 1H), 6.80 (d,  $J = 8.0$  Hz, 1H), 6.70 (d,  $J = 11.6$  Hz, 1H), 5.12 (s, 2H), 2.94 – 2.90 (m, 2H), 2.89 – 2.84 (m, 2H).  $^{13}\text{C}$  NMR (101 MHz, Chloroform-*d*)  $\delta$  171.8, 161.5 (d,  $J_{\text{C-F}} = 255.8$  Hz), 149.6, 148.7, 146.4 (d,  $J_{\text{C-F}} = 8.4$  Hz), 140.6, 139.7, 139.5, 137.9, 136.8, 136.5, 135.4 (d,  $J_{\text{C-F}} = 1.8$  Hz), 134.1, 133.6, 130.4 (d,  $J_{\text{C-F}} = 3.1$  Hz), 129.6 (d,  $J_{\text{C-F}} = 8.9$  Hz), 129.5, 129.4, 129.01, 128.97, 128.8, 128.2, 127.8, 127.6, 124.8 (d,  $J_{\text{C-F}} = 3.2$  Hz), 122.8, 118.6 (d,  $J_{\text{C-F}} = 11.6$  Hz), 116.2 (d,  $J_{\text{C-F}} = 21.7$  Hz), 49.3, 37.3, 30.2. HRMS ( $m/z$ , ESI-TOF): Calcd for  $\text{C}_{35}\text{H}_{28}\text{ClFN}_2\text{O}_5\text{S}_2\text{Na}^+$  [ $\text{M}+\text{Na}^+$ ] 697.1004, found 697.1005.

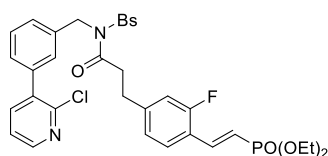

**Diethyl (*E*)-(4-(3-(*N*-(3-(2-chloropyridin-3-yl)benzyl)phenylsulfonamido)-3-oxo-propyl)-2-fluorostyryl)phosphonate (3hi)**

The general procedure **A** was followed (75 °C under air). Conversion: 77 %. Yield: 38.2 mg (57%), *p*: others > 20:1.

$^1\text{H}$  NMR (400 MHz, Chloroform-*d*)  $\delta$  8.39 (dd,  $J = 4.8, 2.0$  Hz, 1H), 7.72 – 7.65 (m, 2H), 7.64 – 7.49 (m, 3H), 7.50 – 7.41 (m, 2H), 7.41 – 7.36 (m, 4H), 7.34 – 7.25 (m, 2H), 6.79 (dd,  $J = 8.0, 1.7$  Hz, 1H), 6.68 (dd,  $J = 11.5, 1.7$  Hz, 1H), 6.30 (t,  $J = 17.9$  Hz, 1H), 5.13 (s, 2H), 4.17 – 4.09 (m, 4H), 2.96 – 2.90 (m, 2H), 2.90 – 2.83 (m, 2H), 1.35 (t,  $J = 7.1$  Hz, 6H).  $^{13}\text{C}$  NMR (101 MHz, Chloroform-*d*)  $\delta$  171.9, 161.0 (d,  $J_{\text{C-F}} = 254.1$  Hz), 149.6, 148.7, 145.0 (d,  $J_{\text{C-F}} = 8.3$  Hz), 141.0 (dd,  $J_{\text{C-P}} = 7.4, J_{\text{C-F}} = 2.8$  Hz), 139.7, 139.5, 137.9, 136.8, 136.6, 134.2, 129.4, 129.4, 129.0, 128.9, 128.8, 128.1, 127.6, 124.5 (d,  $J_{\text{C-F}} = 3.1$  Hz), 122.7, 120.9 (dd,  $J_{\text{C-P}} = 23.9, J_{\text{C-F}} = 11.5$  Hz), 116.5 (dd,  $J_{\text{C-P}} = 190.7, J_{\text{C-F}} = 6.3$  Hz), 116.0 (d,  $J_{\text{C-F}} = 21.9$  Hz), 62.0 (d,  $J_{\text{C-P}} = 5.5$  Hz), 49.3, 37.4, 30.2, 16.5 (d,  $J_{\text{C-P}} = 6.4$  Hz). HRMS ( $m/z$ , ESI-TOF): Calcd for  $\text{C}_{33}\text{H}_{33}\text{ClFN}_2\text{O}_6\text{PSNa}^+$  [ $\text{M}+\text{Na}^+$ ] 693.1362, found 693.1362.

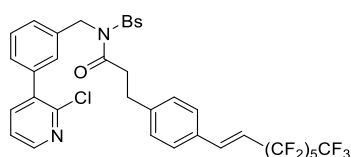



**(E)-N-(3-(2-chloropyridin-3-yl)benzyl)-N-(phenylsulfonyl)-3-(4-(3,3,4,4,5,5,6,6,7,7,8,8,8-tridecafluorooct-1-en-1-yl)phenyl)propanamide (4a)**

The general procedure **A** was followed (70 °C under air). Conversion: 77 %. Yield: 54.2 mg (65%), *p*: others > 20:1; The general procedure **B** was followed (**2** (3.0 equiv), HFIP (1.5 mL), 80 °C). Conversion: 85 %. Yield: 60.9 mg (73%), *p*: others > 20:1.

<sup>1</sup>H NMR (400 MHz, Chloroform-*d*) δ 8.40 (dd, *J* = 4.8, 1.9 Hz, 1H), 7.74 – 7.66 (m, 2H), 7.64 – 7.56 (m, 2H), 7.45 (t, *J* = 7.9 Hz, 2H), 7.39 (td, *J* = 4.8, 4.0, 1.7 Hz, 4H), 7.33 – 7.27 (m, 3H), 7.10 (dt, *J* = 16.3, 2.5 Hz, 1H), 7.03 (d, *J* = 8.1 Hz, 2H), 6.14 (dt, *J* = 16.2, 12.2 Hz, 1H), 5.14 (s, 2H), 2.97 – 2.93 (m, 2H), 2.91 – 2.87 (m, 2H). <sup>13</sup>C NMR (101 MHz, Chloroform-*d*) δ 172.2, 149.7, 148.7, 142.8, 139.8, 139.6, 139.5 (t, *J*<sub>C-F</sub> = 9.7 Hz), 137.9, 136.9, 136.6, 134.0, 131.7, 129.4, 129.0, 128.9, 128.8, 128.3, 127.9, 127.7, 122.7, 113.9 (t, *J*<sub>C-F</sub> = 23.0 Hz), 49.3, 37.8, 30.5. <sup>19</sup>F NMR (376 MHz, Chloroform-*d*) δ -80.8 (t, *J* = 9.9 Hz), -111.0 (q, *J* = 12.3, 11.5 Hz), -121.5 – -121.7 (m), -122.7 – -123.0 (m), -123.2 – -123.3 (m), -126.1 – -126.2 (m). HRMS (m/z, ESI-TOF): Calcd for C<sub>35</sub>H<sub>24</sub>ClF<sub>13</sub>N<sub>2</sub>O<sub>3</sub>SNa<sup>+</sup> [M+Na<sup>+</sup>] 857.0881, found 857.0876.

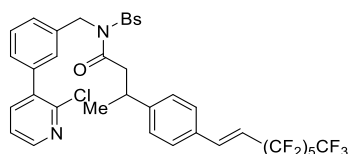

**(E)-N-(3-(2-chloropyridin-3-yl)benzyl)-N-(phenylsulfonyl)-3-(4-(3,3,4,4,5,5,6,6,7,7,8,8,8-tridecafluorooct-1-en-1-yl)phenyl)butanamide (4b)**

The general procedure **A** was followed (70 °C under air). Conversion: 80 %. Yield: 61.9 mg (73%), *p*: others > 20:1.

<sup>1</sup>H NMR (400 MHz, Chloroform-*d*) δ 8.41 (dd, *J* = 4.8, 1.9 Hz, 1H), 7.70 (d, *J* = 7.6 Hz, 2H), 7.61 (dd, *J* = 7.7, 2.6 Hz, 2H), 7.48 (t, *J* = 7.7 Hz, 2H), 7.41 – 7.34 (m, 3H), 7.33 – 7.26 (m, 4H), 7.11 (dt, *J* = 16.1, 2.3 Hz, 1H), 7.03 (d, *J* = 8.0 Hz, 2H), 6.14 (dt, *J* = 16.0, 12.1 Hz, 1H), 5.15 – 5.06 (m, 2H), 3.36 (h, *J* = 6.9 Hz, 1H), 3.01 (dd, *J* = 16.7, 7.6 Hz, 1H), 2.87 (dd, *J* = 16.7, 6.7 Hz, 1H), 1.14 (d, *J* = 6.9 Hz, 3H). <sup>13</sup>C NMR (101 MHz, Chloroform-*d*) δ 171.7, 149.7, 148.7, 148.1, 139.8, 139.7, 139.5 (t, *J*<sub>C-F</sub> = 9.3 Hz), 137.9, 137.0, 136.6, 133.9, 131.7, 129.4, 129.1, 128.9, 128.8, 128.2, 127.9, 127.6, 127.5, 122.7, 113.8 (t, *J*<sub>C-F</sub> = 23.0 Hz), 49.1, 44.4, 36.0, 21.7. <sup>19</sup>F NMR (376 MHz, Chloroform-*d*) δ -80.8 (t, *J* = 9.9 Hz), -110.9 (q, *J* = 12.7, 12.3 Hz), -121.5 – -121.7 (m), -122.8 – -122.9 (m), -123.2 – -123.3 (m), -126.1 – -126.2 (m). HRMS (m/z, ESI-TOF): Calcd for C<sub>36</sub>H<sub>26</sub>ClF<sub>13</sub>N<sub>2</sub>O<sub>3</sub>SNa<sup>+</sup> [M+Na<sup>+</sup>] 871.1031, found 871.1032.

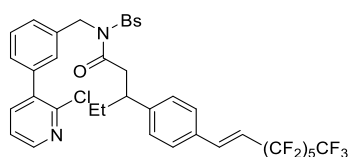

**(E)-N-(3-(2-chloropyridin-3-yl)benzyl)-N-(phenylsulfonyl)-3-(4-(3,3,4,4,5,5,6,6,7,7,8,8,8-tridecafluorooct-1-en-1-yl)phenyl)pentanamide (4c)**

The general procedure **A** was followed (70 °C under air). Conversion: 82 %. Yield: 64.7 mg (75%), *p*: others > 20:1.

<sup>1</sup>H NMR (400 MHz, Chloroform-*d*) δ 8.41 (d, *J* = 4.7 Hz, 1H), 7.67 (d, *J* = 8.0 Hz, 2H), 7.64 – 7.56 (m, 2H), 7.47 (t, *J* = 7.6 Hz, 2H), 7.39 – 7.36 (m, 2H), 7.34 – 7.20 (m, 5H), 7.10 (d, *J* = 16.1 Hz, 1H), 6.97 (d, *J* = 7.8 Hz, 2H), 6.14 (dt, *J* = 16.2, 12.1 Hz, 1H), 5.30 – 4.98 (m, 2H), 3.21 – 2.80 (m, 3H), 1.63 – 1.53 (m, 1H), 1.49 – 1.39 (m, 1H), 0.68 (t, *J* = 7.3 Hz, 3H). <sup>13</sup>C NMR (101 MHz, Chloroform-*d*) δ 171.8, 149.7, 148.6, 146.4, 139.79, 139.75, 139.6 (t, *J*<sub>C-F</sub> = 9.2 Hz), 137.9, 137.0, 136.6, 133.9, 131.7, 129.4, 129.0, 128.8, 128.7, 128.2, 128.1, 127.8, 127.6, 122.7, 113.7 (t, *J*<sub>C-F</sub> = 22.9 Hz), 49.1, 43.3, 43.0, 29.0, 11.9. <sup>19</sup>F NMR (376 MHz, Chloroform-*d*) δ -80.8 (t, *J* = 9.8 Hz), -110.9 (q, *J* = 12.9, 12.3 Hz), -121.5 – -121.7 (m), -122.8 – -122.9 (m), -123.1 – -123.2 (m), -126.1 – -126.2 (m). HRMS (*m/z*, ESI-TOF): Calcd for C<sub>37</sub>H<sub>28</sub>ClF<sub>13</sub>N<sub>2</sub>O<sub>3</sub>SN<sup>+</sup> [M+Na<sup>+</sup>] 885.1194, found 885.1189.

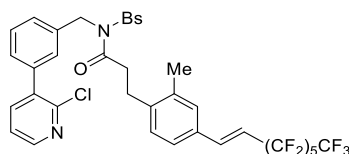

**(E)-N-(3-(2-chloropyridin-3-yl)benzyl)-3-(2-methyl-4-(3,3,4,4,5,5,6,6,7,7,8,8,8-tridecafluorooct-1-en-1-yl)phenyl)-N-(phenylsulfonyl)propanamide (4d)**

The general procedure **A** was followed (70 °C under air). Conversion: 70 %. Yield: 51.7 mg (61%), *p*: others > 20:1.

<sup>1</sup>H NMR (400 MHz, Chloroform-*d*) δ 8.40 (dd, *J* = 4.8, 1.9 Hz, 1H), 7.71 (d, *J* = 7.7 Hz, 2H), 7.65 – 7.57 (m, 2H), 7.50 – 7.38 (m, 6H), 7.31 (dd, *J* = 7.6, 4.8 Hz, 1H), 7.18 (s, 1H), 7.15 – 7.04 (m, 2H), 6.93 (d, *J* = 7.8 Hz, 1H), 6.13 (dt, *J* = 16.4, 12.2 Hz, 1H), 5.16 (s, 2H), 2.88 (s, 4H), 2.16 (s, 3H). <sup>13</sup>C NMR (101 MHz, Chloroform-*d*) δ 172.4, 149.7, 148.7, 140.9, 139.8, 139.6, 139.6 (t, *J*<sub>C-F</sub> = 8.9 Hz), 138.0, 137.0, 136.9, 136.6, 134.0, 131.8, 129.6, 129.4, 129.2, 129.0, 128.9, 128.2, 127.7, 125.5, 122.7, 113.6 (t, *J*<sub>C-F</sub> = 22.9 Hz), 49.4, 36.5, 27.9, 19.2. <sup>19</sup>F NMR (376 MHz, Chloroform-*d*) δ -80.8 (t,

$J = 10.0$  Hz), -110.9 (q,  $J = 12.7, 12.3$  Hz), -121.5 – -121.7 (m), -122.8 – -122.9 (m), -123.2 – -123.3 (m), -126.1 – -126.2 (m). HRMS (m/z, ESI-TOF): Calcd for  $C_{36}H_{26}ClF_{13}N_2O_3SNa^+$  [M+Na<sup>+</sup>] 871.1037, found 871.1032.

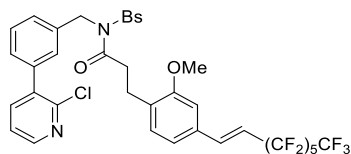

**(E)-N-(3-(2-chloropyridin-3-yl)benzyl)-3-(2-methoxy-4-(3,3,4,4,5,5,6,6,7,7,8,8,8-tridecafluorooct-1-en-1-yl)phenyl)-N-(phenylsulfonyl)propanamide (4e)**

The general procedure **B** was followed (**2** (3.0 equiv), HFIP (1.5 mL), 80 °C). Conversion: 70 %. Yield: 44.9 mg (52%), *p*: others > 20:1.

<sup>1</sup>H NMR (400 MHz, Chloroform-*d*)  $\delta$  8.40 (dd,  $J = 4.7, 1.9$  Hz, 1H), 7.73 (d,  $J = 7.8$  Hz, 2H), 7.65 – 7.54 (m, 2H), 7.46 (d,  $J = 7.7$  Hz, 2H), 7.40 (s, 4H), 7.30 (dd,  $J = 7.6, 4.7$  Hz, 1H), 7.10 (dt,  $J = 16.0$  Hz, 2.3 Hz, 1H), 7.00 (d,  $J = 7.6$  Hz, 1H), 6.91 (d,  $J = 7.6$  Hz, 1H), 6.82 (s, 1H), 6.13 (dt,  $J = 16.0, 12.1$  Hz, 1H), 5.15 (s, 2H), 3.72 (s, 3H), 2.92 – 2.85 (m, 4H). <sup>13</sup>C NMR (101 MHz, Chloroform-*d*)  $\delta$  172.8, 157.8, 149.7, 148.7, 139.8 (t,  $J_{C-F} = 9.2$  Hz), 139.8, 139.7, 137.9, 137.1, 136.6, 133.8, 133.2, 131.2, 130.7, 129.2, 128.88, 128.87, 128.8, 128.0, 127.8, 122.7, 120.4, 113.8 (t,  $J_{C-F} = 23.3$  Hz), 108.9, 55.3, 49.4, 36.0, 26.0. <sup>19</sup>F NMR (376 MHz, Chloroform-*d*)  $\delta$  -80.8 (t,  $J = 10.0$  Hz), -110.9 (t,  $J = 13.0$  Hz), -121.5 – -121.7 (m), -122.8 – -122.9 (m), -123.1 – -123.2 (m), -126.1 – -126.2 (m). HRMS (m/z, ESI-TOF): Calcd for  $C_{36}H_{26}ClF_{13}N_2O_4SNa^+$  [M+Na<sup>+</sup>] 887.0986, found 887.0978.

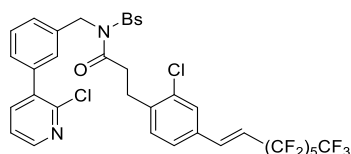

**(E)-3-(2-chloro-4-(3,3,4,4,5,5,6,6,7,7,8,8,8-tridecafluorooct-1-en-1-yl)phenyl)-N-(3-(2-chloropyridin-3-yl)benzyl)-N-(phenylsulfonyl)propanamide (4f)**

The general procedure **B** was followed (**2** (3.0 equiv), HFIP (1.5 mL), 80 °C). Conversion: 60 %. Yield: 46.0 mg (53%), *p*: others = 13:1.

<sup>1</sup>H NMR (400 MHz, Chloroform-*d*)  $\delta$  8.40 (dd,  $J = 4.8, 1.9$  Hz, 1H), 7.71 (d,  $J = 7.9$  Hz, 2H), 7.65 – 7.56 (m, 2H), 7.48 – 7.35 (m, 7H), 7.31 (dd,  $J = 7.6, 4.8$  Hz, 1H), 7.17 (dd,  $J = 7.9, 1.6$  Hz, 1H), 7.12 (d,  $J = 8.0$  Hz, 1H), 7.05 (d,  $J = 16.1$  Hz, 1H), 6.16 (dt,  $J = 16.3, 11.9$  Hz, 1H), 5.15 (s, 2H), 3.02 – 2.94 (m, 4H). <sup>13</sup>C NMR (101 MHz,

Chloroform-*d*)  $\delta$  172.1, 149.7, 148.7, 139.9, 139.8, 139.6, 138.2 (t,  $J_{C-F}$  = 9.3 Hz), 138.0, 136.9, 136.6, 134.7, 134.0, 133.6, 131.3, 129.4, 128.99, 128.96, 128.9, 128.5, 128.2, 127.7, 126.2, 122.7, 115.4 (t,  $J_{C-F}$  = 23.2 Hz), 49.4, 36.0, 28.7.  $^{19}\text{F}$  NMR (376 MHz, Chloroform-*d*)  $\delta$  -80.8 (t,  $J$  = 10.0 Hz), -111.3 (t,  $J$  = 12.5 Hz), -121.5 – -121.7 (m), -122.8 – -122.9 (m), -123.1 – -123.2 (m), -126.1 – -126.2 (m). HRMS (m/z, ESI-TOF): Calcd for  $\text{C}_{35}\text{H}_{23}\text{Cl}_2\text{F}_{13}\text{N}_2\text{O}_3\text{SNa}^+$  [M+Na $^+$ ] 891.0491, found 891.0484.

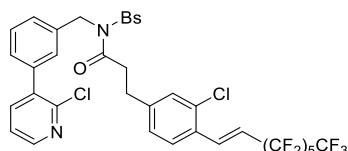

**(*E*)-3-(3-chloro-4-(3,3,4,4,5,5,6,6,7,7,8,8,8-tridecafluorooct-1-en-1-yl)phenyl)-*N*-(3-(2-chloropyridin-3-yl)benzyl)-*N*-(phenylsulfonyl)propanamide (4g)**

The general procedure **B** was followed (**2** (3.0 equiv), HFIP (1.5 mL), 80 °C). Conversion: 65 %. Yield: 48.6 mg (56%), *p*: others > 20:1.

$^1\text{H}$  NMR (400 MHz, Chloroform-*d*)  $\delta$  8.39 (dd,  $J$  = 4.7, 1.7 Hz, 1H), 7.69 (d,  $J$  = 7.4 Hz, 2H), 7.66 – 7.56 (m, 2H), 7.52 (d,  $J$  = 16.2 Hz, 1H), 7.46 (t,  $J$  = 7.8 Hz, 2H), 7.43 – 7.34 (m, 5H), 7.31 (dd,  $J$  = 7.5, 4.7 Hz, 1H), 7.04 (s, 1H), 6.96 (d,  $J$  = 8.9 Hz, 1H), 6.15 (dt,  $J$  = 16.3, 12.0 Hz, 1H), 5.14 (s, 2H), 2.94 (t,  $J$  = 6.5 Hz, 3H), 2.87 (t,  $J$  = 6.8 Hz, 3H).  $^{13}\text{C}$  NMR (101 MHz, Chloroform-*d*)  $\delta$  171.9, 149.7, 148.7, 144.2, 139.8, 139.5, 138.0, 136.9, 136.6, 135.9 (t,  $J_{C-F}$  = 9.5 Hz), 134.5, 134.1, 129.9, 129.4, 129.1, 129.0, 128.9, 128.2, 127.61, 127.58, 127.5, 122.7, 116.6 (t,  $J_{C-F}$  = 22.9 Hz), 49.4, 37.5, 30.0.  $^{19}\text{F}$  NMR (376 MHz, Chloroform-*d*)  $\delta$  -80.8 (t,  $J$  = 9.9 Hz), -111.2 – -111.3 (m), -121.5 – -121.7 (m), -122.8 – -122.9 (m), -123.1 – -123.2 (m), -126.1 – -126.2 (m). HRMS (m/z, ESI-TOF): Calcd for  $\text{C}_{35}\text{H}_{23}\text{Cl}_2\text{F}_{13}\text{N}_2\text{O}_3\text{SNa}^+$  [M+Na $^+$ ] 891.0491, found 891.0495.

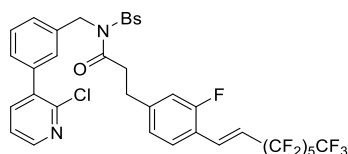

**(*E*)-*N*-(3-(2-chloropyridin-3-yl)benzyl)-3-(3-fluoro-4-(3,3,4,4,5,5,6,6,7,7,8,8,8-tridecafluorooct-1-en-1-yl)phenyl)-*N*-(phenylsulfonyl)propanamide (4h)**

The general procedure **A** was followed (70 °C under air). Conversion: 69 %. Yield: 51.1 mg (60%), *p*: others > 20:1.

$^1\text{H}$  NMR (400 MHz, Chloroform-*d*)  $\delta$  8.41 (dd,  $J$  = 4.8, 1.9 Hz, 1H), 7.70 (d,  $J$  = 7.5 Hz, 2H), 7.66 – 7.57 (m, 2H), 7.47 (t,  $J$  = 7.8 Hz, 2H), 7.44 – 7.37 (m, 4H), 7.35 – 7.25

(m, 2H), 7.21 (dt,  $J = 16.4, 2.5$  Hz, 1H), 6.84 (d,  $J = 8.0$  Hz, 1H), 6.73 (d,  $J = 11.6$  Hz, 1H), 6.28 (dt,  $J = 16.4, 12.1$  Hz, 1H), 5.15 (s, 2H), 2.98 – 2.94 (m, 2H), 2.91 – 2.87 (m, 2H).  $^{13}\text{C}$  NMR (101 MHz, Chloroform-*d*)  $\delta$  171.9, 161.0 (d,  $J_{\text{C-F}} = 254.2$  Hz), 149.7, 148.7, 145.1 (d,  $J_{\text{C-F}} = 8.2$  Hz), 139.8, 139.6, 138.0, 136.9, 136.6, 134.1, 132.6 (td,  $J_{\text{C-F}} = 10.2, 2.2$  Hz), 129.4, 129.1, 129.06 (d,  $J_{\text{C-F}} = 3.5$  Hz), 129.00, 128.86, 128.2, 127.6, 124.7 (d,  $J_{\text{C-F}} = 3.2$  Hz), 122.7, 119.6 (d,  $J_{\text{C-F}} = 11.7$  Hz), 116.5 (td,  $J_{\text{C-F}} = 23.3, 22.8, 7.1$  Hz), 116.1 (d,  $J_{\text{C-F}} = 22.0$  Hz), 49.4, 37.5, 30.2.  $^{19}\text{F}$  NMR (376 MHz, Chloroform-*d*)  $\delta$  -80.8 (t,  $J = 9.9$  Hz), -111.5 (q,  $J = 12.7, 12.3$  Hz), -115.1 (dd,  $J = 11.5, 7.7$  Hz), -121.5 – -121.6 (m), -122.8 – -122.9 (m), -123.1 – -123.2 (m), -126.1 – -126.2 (m). HRMS (*m/z*, ESI-TOF): Calcd for  $\text{C}_{35}\text{H}_{23}\text{ClF}_{14}\text{N}_2\text{O}_3\text{SNa}^+$  [ $\text{M}+\text{Na}^+$ ] 875.0787, found 875.0777.

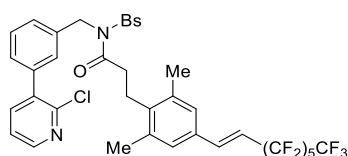

**(*E*)-*N*-(3-(2-chloropyridin-3-yl)benzyl)-3-(2,6-dimethyl-4-(3,3,4,4,5,5,6,6,7,7,8,8,8-tridecafluorooct-1-en-1-yl)phenyl)-*N*-(phenylsulfonyl)propanamide (4i)**

The general procedure **A** was followed (70 °C under air). Conversion: 60 %. Yield: 38.8 mg (45%), *p*: others = 13:1.

$^1\text{H}$  NMR (400 MHz, Chloroform-*d*)  $\delta$  8.41 (dd,  $J = 4.8, 1.9$  Hz, 1H), 7.74 (d,  $J = 7.4$  Hz, 2H), 7.67 – 7.57 (m, 2H), 7.52 – 7.38 (m, 6H), 7.32 (dd,  $J = 7.5, 4.8$  Hz, 1H), 7.06 – 7.02 (m, 3H), 6.13 (dt,  $J = 16.3, 12.2$  Hz, 1H), 5.19 (s, 2H), 2.93 – 2.84 (m, 2H), 2.73 – 2.65 (m, 2H), 2.13 (s, 6H).  $^{13}\text{C}$  NMR (101 MHz, Chloroform-*d*)  $\delta$  172.6, 149.7, 148.7, 139.8, 139.61, 139.60 (d,  $J_{\text{C-F}} = 9.4$  Hz), 139.5, 138.1, 137.1, 137.0, 136.6, 134.0, 131.5, 129.4, 129.02, 128.97, 128.9, 128.1, 127.7, 127.6, 122.7, 113.6 (t,  $J_{\text{C-F}} = 23.0$  Hz), 49.5, 35.4, 24.9, 19.7.  $^{19}\text{F}$  NMR (376 MHz, Chloroform-*d*)  $\delta$  -80.8 (t,  $J = 10.0$  Hz), -110.9 (q,  $J = 13.0$  Hz), -121.5 – -121.7 (m), -122.8 – -122.9 (m), -123.2 – -123.3 (m), -126.1 – -126.2 (m). HRMS (*m/z*, ESI-TOF): Calcd for  $\text{C}_{37}\text{H}_{28}\text{ClF}_{13}\text{N}_2\text{O}_3\text{SNa}^+$  [ $\text{M}+\text{Na}^+$ ] 885.1194, found 885.1183.

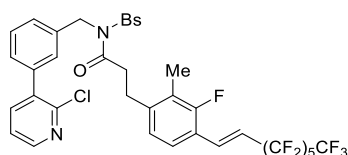

**(*E*)-*N*-(3-(2-chloropyridin-3-yl)benzyl)-3-(3-fluoro-2-methyl-4-**

**(3,3,4,4,5,5,6,6,7,7,8,8,8-tridecafluorooct-1-en-1-yl)phenyl)-*N*-(phenylsulfonyl)-propanamide (4j)**

The general procedure **A** was followed (70 °C under air). Conversion: 56 %. Yield: 44.2 mg (51%), *p*: others > 20:1.

<sup>1</sup>H NMR (400 MHz, Chloroform-*d*) δ 8.40 (dd, *J* = 4.8, 1.9 Hz, 1H), 7.69 (d, *J* = 7.2 Hz, 2H), 7.65 – 7.56 (m, 2H), 7.44 (dd, *J* = 16.2, 8.4 Hz, 6H), 7.31 (dd, *J* = 7.6, 4.8 Hz, 1H), 7.22 (dt, *J* = 16.3, 2.5 Hz, 1H), 7.11 (t, *J* = 7.7 Hz, 1H), 6.75 (d, *J* = 8.0 Hz, 1H), 6.26 (dt, *J* = 16.4, 12.1 Hz, 1H), 5.16 (s, 2H), 2.93 – 2.82 (m, 4H), 2.04 (d, *J* = 2.3 Hz, 3H). <sup>13</sup>C NMR (101 MHz, Chloroform-*d*) δ 172.1, 159.5 (d, *J*<sub>C-F</sub> = 251.2 Hz), 149.7, 148.7, 143.2 (d, *J*<sub>C-F</sub> = 4.8 Hz), 139.8, 139.6, 138.0, 136.9, 136.6, 134.0, 133.3 – 132.9 (m), 129.4, 129.1, 129.0, 128.9, 128.2, 127.6, 125.8, 124.5 (d, *J*<sub>C-F</sub> = 3.5 Hz), 124.2 (d, *J*<sub>C-F</sub> = 16.6 Hz), 122.8, 119.5 (d, *J*<sub>C-F</sub> = 13.9 Hz), 116.5 (td, *J*<sub>C-F</sub> = 24.1, 23.7, 8.0 Hz), 49.4, 36.6, 28.0 (d, *J*<sub>C-F</sub> = 2.6 Hz), 10.4 (d, *J*<sub>C-F</sub> = 7.0 Hz). <sup>19</sup>F NMR (376 MHz, Chloroform-*d*) δ -80.8 (t, *J* = 9.9 Hz), -111.4 (q, *J* = 12.7 Hz), -117.8 (d, *J* = 7.2 Hz), -121.5 – -121.7 (m), -122.8 – -122.9 (m), -123.2 – -123.3 (m), -126.1 – -126.2 (m). HRMS (*m/z*, ESI-TOF): Calcd for C<sub>36</sub>H<sub>25</sub>ClF<sub>14</sub>N<sub>2</sub>O<sub>3</sub>SNa<sup>+</sup> [*M*+Na<sup>+</sup>] 889.0943, found 889.0931.

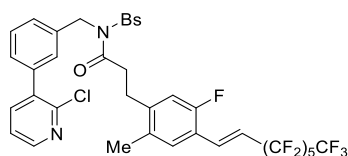

**(*E*)-*N*-(3-(2-chloropyridin-3-yl)benzyl)-3-(5-fluoro-2-methyl-4-(3,3,4,4,5,5,6,6,7,7,8,8,8-tridecafluorooct-1-en-1-yl)phenyl)-*N*-(phenylsulfonyl)-propanamide (4k)**

The general procedure **A** was followed (70 °C under air). Conversion: 60 %. Yield: 50.2 mg (58%), *p*: others > 20:1.

<sup>1</sup>H NMR (400 MHz, Chloroform-*d*) δ 8.39 (dd, *J* = 4.8, 1.9 Hz, 1H), 7.71 (d, *J* = 8.4 Hz, 2H), 7.65 – 7.57 (m, 2H), 7.47 (t, *J* = 7.8 Hz, 2H), 7.44 – 7.40 (m, 4H), 7.30 (dd, *J* = 7.6, 4.8 Hz, 1H), 7.21 – 7.12 (m, 2H), 6.61 (d, *J* = 11.5 Hz, 1H), 6.26 (dt, *J* = 16.4, 12.1 Hz, 1H), 5.17 (s, 2H), 2.92 – 2.86 (m, 2H), 2.86 – 2.80 (m, 2H), 2.13 (s, 3H). <sup>13</sup>C NMR (101 MHz, Chloroform-*d*) δ 172.0, 159.5 (d, *J*<sub>C-F</sub> = 251.1 Hz), 149.7, 148.7, 142.9 (d, *J*<sub>C-F</sub> = 7.7 Hz), 139.8, 139.6, 138.0, 136.9, 136.6, 134.1, 132.7 (t, *J*<sub>C-F</sub> = 10.2 Hz), 132.4 (d, *J*<sub>C-F</sub> = 3.3 Hz), 130.4, 129.5, 129.1, 129.0, 128.9, 128.2, 127.6, 122.7, 119.2 (d, *J*<sub>C-F</sub> = 11.5 Hz), 116.6 – 115.9 (m), 115.9 (d, *J*<sub>C-F</sub> = 21.9 Hz), 49.4, 36.2, 27.9, 18.6. <sup>19</sup>F NMR (376 MHz, Chloroform-*d*) δ -80.8 (t, *J* = 9.9 Hz), -111.5 (q, *J* = 12.6, 12.1

Hz), -119.5 (dd,  $J = 11.4, 7.6$  Hz), -121.5 – -121.6 (m), -122.8 – -122.9 (m), -123.2 – -123.3 (m), -126.1 – -126.2 (m). HRMS ( $m/z$ , ESI-TOF): Calcd for  $C_{36}H_{25}ClF_{14}N_2O_3SNa^+$  [ $M+Na^+$ ] 889.0943, found 889.0937.

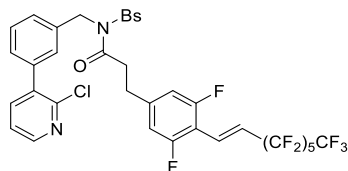

**(E)-N-(3-(2-chloropyridin-3-yl)benzyl)-3-(3,5-difluoro-4-(3,3,4,4,5,5,6,6,7,7,8,8,8-tridecafluorooct-1-en-1-yl)phenyl)-N-(phenylsulfonyl)propanamide (4l)**

The general procedure **A** was followed (70 °C under air). Conversion: 65 %. Yield: 53.1 mg (61%),  $p$ : others > 20:1.

$^1H$  NMR (400 MHz, Chloroform- $d$ )  $\delta$  8.39 (dd,  $J = 4.9, 1.9$  Hz, 1H), 7.69 (d,  $J = 7.9$  Hz, 2H), 7.66 – 7.58 (m, 2H), 7.47 (t,  $J = 7.7$  Hz, 2H), 7.43 (s, 1H), 7.40 (s, 3H), 7.31 (dd,  $J = 7.6, 4.8$  Hz, 1H), 7.16 (dd,  $J = 16.5, 2.7$  Hz, 1H), 6.57 (d,  $J = 9.7$  Hz, 2H), 6.52 – 6.45 (m, 1H), 5.15 (s, 2H), 2.94 (t,  $J = 6.6$  Hz, 2H), 2.87 (t,  $J = 6.6$  Hz, 2H).  $^{13}C$  NMR (101 MHz, Chloroform- $d$ )  $\delta$  171.6, 161.2 (dd,  $J_{C-F} = 254.8, 7.4$  Hz), 149.7, 148.7, 145.3 (t,  $J_{C-F} = 10.3$  Hz), 139.8, 139.5, 138.0, 136.8, 136.6, 134.2, 129.5, 129.2, 129.0, 128.9, 128.2, 127.6, 126.35 – 126.04 (m), 122.7, 120.4 – 119.4 (m), 111.9 (dd,  $J_{C-F} = 24.4, 14.3$  Hz), 109.4 (t,  $J_{C-F} = 14.8$  Hz), 49.4, 37.2, 30.3.  $^{19}F$  NMR (376 MHz, Chloroform- $d$ )  $\delta$  -80.8 (t,  $J = 9.9$  Hz), -111.4 (d,  $J = 9.8$  Hz), -112.3 (q,  $J = 12.8$  Hz), -121.5 – -121.7 (m), -122.8 – -122.9 (m), -123.2 – -123.3 (m), -126.1 – -126.2 (m). HRMS ( $m/z$ , ESI-TOF): Calcd for  $C_{35}H_{22}ClF_{15}N_2O_3SNa^+$  [ $M+Na^+$ ] 893.0692, found 893.0688.

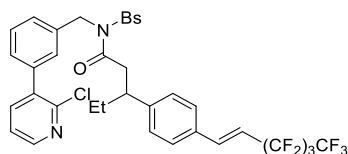

**(E)-N-(3-(2-chloropyridin-3-yl)benzyl)-3-(4-(3,3,4,4,5,5,6,6,6-nonafluorohex-1-en-1-yl)phenyl)-N-(phenylsulfonyl)pentanamide (4m)**

The general procedure **A** was followed (70 °C under air). Conversion: 66 %. Yield: 38.1 mg (50%),  $p$ : others = 11:1.

$^1H$  NMR (400 MHz, Chloroform- $d$ )  $\delta$  8.41 (dd,  $J = 4.8, 2.0$  Hz, 1H), 7.70 – 7.57 (m, 4H), 7.47 (t,  $J = 7.8$  Hz, 2H), 7.40 – 7.35 (m, 2H), 7.34 – 7.28 (m, 2H), 7.27 – 7.22 (m, 3H), 7.10 (dt,  $J = 16.2, 2.5$  Hz, 1H), 6.96 (d,  $J = 8.0$  Hz, 2H), 6.13 (dt,  $J = 16.3, 12.3$

Hz, 1H), 5.15 – 5.01 (m, 2H), 3.13 – 3.06 (m, 1H), 3.05 – 2.85 (m, 2H), 1.61 – 1.52 (m, 1H), 1.47 – 1.40 (m, 1H), 0.68 (t,  $J = 7.3$  Hz, 3H).  $^{13}\text{C}$  NMR (101 MHz, Chloroform-*d*)  $\delta$  171.8, 149.7, 148.7, 146.4, 139.79, 139.77, 139.72 – 139.46 (m), 137.9, 137.0, 136.6, 133.9, 131.7, 129.4, 129.1, 128.9, 128.8, 128.2, 128.1, 127.8, 127.6, 122.7, 113.6 (t,  $J_{\text{C-F}} = 23.1$  Hz), 49.1, 43.3, 43.0, 29.0, 11.9.  $^{19}\text{F}$  NMR (376 MHz, Chloroform-*d*)  $\delta$  -79.6 – -82.8 (m), -111.1 (q,  $J = 12.4$  Hz), -124.0 – -124.1 (m), -125.6 – -125.7 (m). HRMS ( $m/z$ , ESI-TOF): Calcd for  $\text{C}_{35}\text{H}_{28}\text{ClF}_9\text{N}_2\text{O}_3\text{SNa}^+$  [ $\text{M}+\text{Na}^+$ ] 785.1258, found 785.1252.

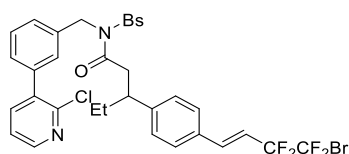

**(*E*)-3-(4-(4-bromo-3,3,4,4-tetrafluorobut-1-en-1-yl)phenyl)-*N*-(3-(2-chloropyridin-3-yl)benzyl)-*N*-(phenylsulfonyl)pentanamide (4n)**

The general procedure **A** was followed (70 °C under air). Conversion: 70 %. Yield: 35.4 mg (49%), *p*: others = 9:1.

$^1\text{H}$  NMR (400 MHz, Chloroform-*d*)  $\delta$  8.41 (dd,  $J = 4.8, 2.0$  Hz, 1H), 7.72 – 7.56 (m, 4H), 7.47 (t,  $J = 7.6$  Hz, 2H), 7.42 – 7.28 (m, 4H), 7.29 – 7.21 (m, 3H), 7.10 (d,  $J = 16.2$  Hz, 1H), 6.95 (d,  $J = 8.0$  Hz, 2H), 6.16 (dt,  $J = 16.3, 11.8$  Hz, 1H), 5.18 – 4.95 (m, 2H), 3.19 – 2.77 (m, 3H), 1.62 – 1.52 (m, 1H), 1.50 – 1.36 (m, 1H), 0.68 (t,  $J = 7.3$  Hz, 3H).  $^{13}\text{C}$  NMR (101 MHz, Chloroform-*d*)  $\delta$  171.8, 149.7, 148.7, 146.3, 139.8, 139.6 (t,  $J_{\text{C-F}} = 8.9$  Hz), 137.8, 137.0, 136.6, 133.9, 131.8, 129.4, 129.0, 128.9, 128.8, 128.2, 128.1, 127.8, 127.6, 122.7, 113.7 (t,  $J_{\text{C-F}} = 23.8$  Hz), 49.1, 43.3, 43.0, 29.0, 11.9.  $^{19}\text{F}$  NMR (376 MHz, Chloroform-*d*)  $\delta$  -65.6 (t,  $J = 6.5$  Hz), -108.87 – -108.9 (m). HRMS ( $m/z$ , ESI-TOF): Calcd for  $\text{C}_{33}\text{H}_{28}\text{BrClF}_4\text{N}_2\text{O}_3\text{SNa}^+$  [ $\text{M}+\text{Na}^+$ ] 745.0521, found 745.0518.

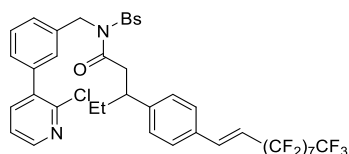

**(*E*)-*N*-(3-(2-chloropyridin-3-yl)benzyl)-3-(4-(3,3,4,4,5,5,6,6,7,7,8,8,9,9,10,10,10-heptafluorodec-1-en-1-yl)phenyl)-*N*-(phenylsulfonyl)pentanamide (4o)**

The general procedure **A** was followed (70 °C under air). Conversion: 70 %. Yield: 57.7 mg (60%), *p*: others > 20:1.



$^1\text{H}$  NMR (400 MHz, Chloroform-*d*)  $\delta$  8.41 (dd,  $J = 4.6, 1.9$  Hz, 1H), 7.67 (d,  $J = 7.9$  Hz, 2H), 7.64 – 7.57 (m, 2H), 7.47 (t,  $J = 7.6$  Hz, 2H), 7.41 – 7.30 (m, 4H), 7.27 – 7.22 (m, 3H), 7.10 (d,  $J = 16.0$  Hz, 1H), 6.96 (d,  $J = 7.9$  Hz, 2H), 6.14 (dt,  $J = 16.2, 12.2$  Hz, 1H), 5.18 – 5.02 (m, 2H), 3.18 – 2.86 (m, 3H), 1.61 – 1.53 (m, 1H), 1.51 – 1.37 (m, 1H), 0.68 (t,  $J = 7.3$  Hz, 3H).  $^{13}\text{C}$  NMR (101 MHz, Chloroform-*d*)  $\delta$  171.8, 149.7, 148.7, 146.4, 139.80, 139.76, 139.7 – 139.4 (m), 137.9, 137.0, 136.6, 133.9, 131.7, 129.4, 129.1, 128.9, 128.8, 128.2, 128.1, 127.8, 127.6, 122.7, 113.7 (t,  $J = 23.1$  Hz), 49.1, 43.3, 43.0, 29.0, 11.9.  $^{19}\text{F}$  NMR (376 MHz, Chloroform-*d*)  $\delta$  -80.8 (t,  $J = 10.1$  Hz), -110.9 (q,  $J = 12.9$  Hz), -121.1 – -121.5 (m), -121.7 – -122.1 (m), -122.7 – -122.8 (m), -122.9 – -123.3 (m), -125.9 – -126.3 (m). HRMS (m/z, ESI-TOF): Calcd for  $\text{C}_{39}\text{H}_{28}\text{ClF}_{17}\text{N}_2\text{O}_3\text{SNa}^+$  [ $\text{M}+\text{Na}^+$ ] 985.1130, found 985.1124.

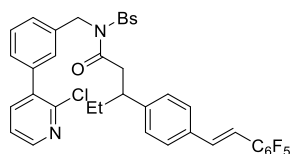

**(*E*)-*N*-(3-(2-chloropyridin-3-yl)benzyl)-3-(4-(2-(perfluorophenyl)vinyl)phenyl)-*N*-(phenylsulfonyl)pentanamide (4p)**

The general procedure **A** was followed (70 °C under air). Conversion: 84 %. Yield: 49.0 mg (69%), *p*: others > 20:1.

$^1\text{H}$  NMR (400 MHz, Chloroform-*d*)  $\delta$  8.39 (dd,  $J = 4.9, 1.9$  Hz, 1H), 7.67 (t,  $J = 8.1$  Hz, 2H), 7.64 – 7.58 (m, 2H), 7.48 (t,  $J = 7.7$  Hz, 2H), 7.42 – 7.28 (m, 7H), 7.24 (d,  $J = 7.3$  Hz, 1H), 6.95 (d,  $J = 7.9$  Hz, 2H), 6.90 (d,  $J = 16.8$  Hz, 1H), 5.15 – 5.01 (m, 2H), 3.19 – 2.79 (m, 3H), 1.63 – 1.52 (m, 1H), 1.51 – 1.37 (m, 1H), 0.70 (t,  $J = 7.4$  Hz, 3H).  $^{13}\text{C}$  NMR (101 MHz, Chloroform-*d*)  $\delta$  171.9, 149.7, 148.6, 145.0, 139.80, 139.77, 137.8, 137.0, 136.6, 134.6, 133.9, 129.4, 129.0, 128.9, 128.8, 128.11, 128.09, 127.7, 127.0, 122.7, 112.6 (td,  $J_{\text{C-F}} = 13.8, 3.7$  Hz), 112.2, 49.1, 43.3, 43.1, 29.0, 11.9.  $^{19}\text{F}$  NMR (376 MHz, Chloroform-*d*)  $\delta$  -142.4 – -143.3 (m), -156.6 (t,  $J = 20.8$  Hz), -162.9 (td,  $J = 21.5, 7.8$  Hz). HRMS (m/z, ESI-TOF): Calcd for  $\text{C}_{37}\text{H}_{28}\text{ClF}_5\text{N}_2\text{O}_3\text{SNa}^+$  [ $\text{M}+\text{Na}^+$ ] 733.1322, found 733.1321.

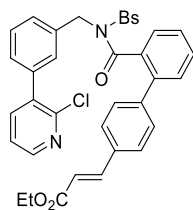

**Ethyl (E)-3-(2'-((3-(2-chloropyridin-3-yl)benzyl)(phenylsulfonyl)carbamoyl)-[1,1'-biphenyl]-4-yl)acrylate (6a)**

The general procedure **B** was followed (**2** (3.0 equiv), HFIP (1.0 mL), 100 °C). Conversion: 70 %. Yield: 33.7 mg (53%), *p*: others = 8:1.

<sup>1</sup>H NMR (400 MHz, Chloroform-*d*) δ 8.40 (dd, *J* = 4.8, 1.9 Hz, 1H), 7.73 – 7.60 (m, 4H), 7.52 (dd, *J* = 7.6, 1.9 Hz, 1H), 7.46 – 7.41 (m, 3H), 7.37 – 7.34 (m, 3H), 7.34 – 7.21 (m, 6H), 7.12 (d, *J* = 7.6 Hz, 1H), 7.03 – 7.02 (m, 2H), 6.47 (d, *J* = 16.0 Hz, 1H), 4.65 (br, 2H), 4.32 (q, *J* = 7.1 Hz, 2H), 1.38 (t, *J* = 7.2 Hz, 3H). <sup>13</sup>C NMR (101 MHz, Chloroform-*d*) δ 170.8, 167.0, 149.6, 148.7, 143.8, 140.7, 139.71, 139.69, 138.8, 138.2, 137.7, 136.6, 136.4, 134.02, 134.00, 133.8, 129.7, 129.3, 129.0, 128.79, 128.78, 128.6, 128.5, 128.5, 128.3, 127.8, 127.7, 122.7, 119.0, 60.8, 50.6, 14.5. HRMS (*m/z*, ESI-TOF): Calcd for C<sub>36</sub>H<sub>29</sub>ClN<sub>2</sub>O<sub>5</sub>SNa<sup>+</sup> [*M*+Na<sup>+</sup>] 659.1378, found 659.1379.

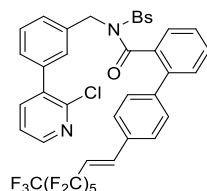

**(E)-N-(3-(2-chloropyridin-3-yl)benzyl)-N-(phenylsulfonyl)-4'-(3,3,4,4,5,5,6,6,7,7,8,8,8-tridecafluorooct-1-en-1-yl)-[1,1'-biphenyl]-2-carboxamide (6b)**

The general procedure **B** was followed (**2** (3.0 equiv), HFIP (1.0 mL), 100 °C). Conversion: 80 %. Yield: 52.9 mg (60%), *p*: others = 20:1.

<sup>1</sup>H NMR (400 MHz, Chloroform-*d*) δ 8.40 (dd, *J* = 4.8, 1.9 Hz, 1H), 7.70 (d, *J* = 7.9 Hz, 2H), 7.60 (t, *J* = 7.5 Hz, 1H), 7.52 (d, *J* = 7.1 Hz, 1H), 7.47 – 7.40 (m, 3H), 7.38 – 7.28 (m, 7H), 7.28 – 7.22 (m, 2H), 7.21 – 7.15 (m, 1H), 7.12 (d, *J* = 7.7 Hz, 1H), 7.05 – 7.03 (m, 2H), 6.24 (dt, *J* = 16.3, 12.1 Hz, 1H), 4.68 (br, 2H). <sup>13</sup>C NMR (101 MHz, Chloroform-*d*) δ 170.8, 149.6, 148.7, 140.8, 139.7, 139.4 – 139.1 (m), 138.9, 138.2, 137.7, 136.6, 136.5, 134.1, 133.8, 133.0, 130.8, 129.8, 129.4, 129.0, 128.8, 128.66, 128.65, 128.3, 128.1, 127.8, 127.8, 122.7, 115.0 (t, *J*<sub>C-F</sub> = 22.6 Hz), 50.6. <sup>19</sup>F NMR (376 MHz, Chloroform-*d*) δ -80.7 (t, *J* = 9.8 Hz), -111.0 (q, *J* = 12.8 Hz), -121.5 – -121.6

(m), -122.8 (br), -122.9 – -123.0 (m), -126.0 – -126.1 (m). HRMS (m/z, ESI-TOF): Calcd for C<sub>39</sub>H<sub>24</sub>ClF<sub>13</sub>N<sub>2</sub>O<sub>3</sub>SNa<sup>+</sup> [M+Na<sup>+</sup>] 905.0881, found 905.0877.

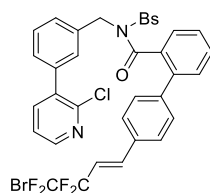

**(E)-4'-(4-bromo-3,3,4,4-tetrafluorobut-1-en-1-yl)-N-(3-(2-chloropyridin-3-yl)benzyl)-N-(phenylsulfonyl)-[1,1'-biphenyl]-2-carboxamide (6c)**

The general procedure **B** was followed (**2** (3.0 equiv), HFIP (1.0 mL), 100 °C). Conversion: 72 %. Yield: 33.4 mg (45%), *p*: others = 10:1.

<sup>1</sup>H NMR (400 MHz, Chloroform-*d*) δ 8.41 (dd, *J* = 4.8, 1.9 Hz, 1H), 7.70 (d, *J* = 7.8 Hz, 2H), 7.61 (t, *J* = 7.3 Hz, 1H), 7.52 (dd, *J* = 7.7, 1.9 Hz, 1H), 7.48 – 7.41 (m, 3H), 7.38 – 7.29 (m, 7H), 7.28 – 7.22 (m, 2H), 7.18 (dt, *J* = 16.2, 2.4 Hz, 1H), 7.12 (d, *J* = 7.7 Hz, 1H), 7.04 – 7.02 (m, 2H), 6.26 (dt, *J* = 16.1, 11.7 Hz, 1H), 4.67 (br, 2H). <sup>13</sup>C NMR (101 MHz, Chloroform-*d*) δ 170.8, 149.6, 148.7, 140.6, 139.7, 139.2 (t, *J*<sub>C-F</sub> = 8.7 Hz), 138.9, 138.2, 137.7, 136.6, 136.5, 134.1, 133.8, 133.1, 130.7, 129.8, 129.4, 129.0, 128.81, 128.79, 128.6, 128.2, 128.0, 127.79, 127.75, 122.7, 115.0 (t, *J*<sub>C-F</sub> = 24.0 Hz), 50.6. <sup>19</sup>F NMR (376 MHz, Chloroform-*d*) δ -65.6 (t, *J* = 6.4 Hz), -108.9 – -109.0 (m). HRMS (m/z, ESI-TOF): Calcd for C<sub>35</sub>H<sub>24</sub>BrClF<sub>4</sub>N<sub>2</sub>O<sub>3</sub>SNa<sup>+</sup> [M+Na<sup>+</sup>] 765.0208, found 765.0198.

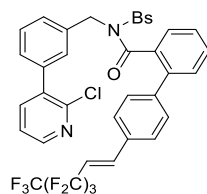

**(E)-N-(3-(2-chloropyridin-3-yl)benzyl)-4'-(3,3,4,4,5,5,6,6,6-nonafluorohex-1-en-1-yl)-N-(phenylsulfonyl)-[1,1'-biphenyl]-2-carboxamide (6d)**

The general procedure **B** was followed (**2** (3.0 equiv), HFIP (1.0 mL), 100 °C). Conversion: 65 %. Yield: 39.1 mg (50%), *p*: others = 10:1.

<sup>1</sup>H NMR (400 MHz, Chloroform-*d*) δ 8.41 (d, *J* = 3.9 Hz, 1H), 7.70 (d, *J* = 7.9 Hz, 2H), 7.61 (t, *J* = 7.4 Hz, 1H), 7.52 (dd, *J* = 7.5, 1.9 Hz, 1H), 7.46 – 7.40 (m, 3H), 7.38 – 7.29 (m, 7H), 7.28 – 7.22 (m, 2H), 7.18 (dt, *J* = 16.1, 2.5 Hz, 1H), 7.12 (d, *J* = 7.6 Hz, 1H), 7.05 – 7.03 (m, 2H), 6.24 (dt, *J* = 16.2, 12.1 Hz, 1H), 4.66 (br, 2H). <sup>13</sup>C NMR (101

MHz, Chloroform-*d*)  $\delta$  170.8, 149.6, 148.7, 140.8, 139.7, 139.2 (t,  $J_{C-F} = 9.1$  Hz), 138.9, 138.2, 137.7, 136.54, 136.46, 134.1, 133.8, 133.0, 130.8, 129.8, 129.4, 129.0, 128.8, 128.7, 128.6, 128.3, 128.1, 127.81, 127.77, 122.7, 114.9 (t,  $J_{C-F} = 23.1$  Hz), 50.6.  $^{19}\text{F}$  NMR (376 MHz, Chloroform-*d*)  $\delta$  -80.9 (t,  $J = 9.5$  Hz), -111.2 (q,  $J = 12.3$  Hz), -122.97 – -124.86 (m), -125.6 – -125.7 (m). HRMS (m/z, ESI-TOF): Calcd for  $\text{C}_{37}\text{H}_{24}\text{ClF}_9\text{N}_2\text{O}_3\text{SNa}^+$  [ $\text{M}+\text{Na}^+$ ] 805.0945, found 805.0943.

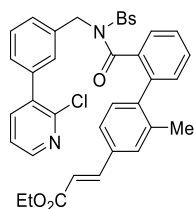

**Ethyl (E)-3-(2'-((3-(2-chloropyridin-3-yl)benzyl)(phenylsulfonyl)carbamoyl)-2-methyl-[1,1'-biphenyl]-4-yl)acrylate (6e)**

The general procedure **B** was followed (**2** (2.0 equiv), HFIP (1.5 mL), 90 °C). Conversion: 65 %. Yield: 33.8 mg (52%), *p*: others = 8:1.

$^1\text{H}$  NMR (400 MHz, Chloroform-*d*)  $\delta$  8.40 (dd,  $J = 4.7, 1.9$  Hz, 1H), 7.70 – 7.52 (m, 5H), 7.45 (t,  $J = 7.5$  Hz, 1H), 7.41 – 7.26 (m, 7H), 7.21 (d,  $J = 7.7$  Hz, 2H), 7.16 – 7.10 (m, 3H), 7.06 (d,  $J = 7.9$  Hz, 1H), 6.47 (d,  $J = 16.0$  Hz, 1H), 4.73 (br, 2H), 4.32 (q,  $J = 7.1$  Hz, 2H), 2.07 (br, 3H), 1.39 (t,  $J = 7.1$  Hz, 3H).  $^{13}\text{C}$  NMR (101 MHz, Chloroform-*d*)  $\delta$  170.4, 167.1, 149.6, 148.7, 144.3, 140.5, 139.78, 139.76, 138.7, 138.2, 137.7, 136.6, 136.5, 134.9, 134.1, 133.7, 130.4, 130.3, 130.2, 128.83, 128.80, 128.76, 128.7, 128.6, 128.5, 127.7, 127.61, 127.59, 125.2, 122.7, 118.6, 60.7, 50.8, 20.2, 14.5. HRMS (m/z, ESI-TOF): Calcd for  $\text{C}_{37}\text{H}_{31}\text{ClN}_2\text{O}_5\text{SNa}^+$  [ $\text{M}+\text{Na}^+$ ] 673.1534, found 673.1533.

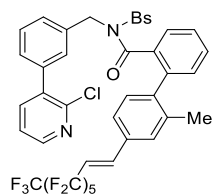

**(E)-N-(3-(2-chloropyridin-3-yl)benzyl)-2'-methyl-N-(phenylsulfonyl)-4'-(3,3,4,4,5,5,6,6,7,7,8,8,8-tridecafluorooct-1-en-1-yl)-[1,1'-biphenyl]-2-carboxamide (6f)**

The general procedure **B** was followed (**2** (3.0 equiv), HFIP (1.0 mL), 100 °C). Conversion: 73 %. Yield: 49.5 mg (55%), *p*: others = 10:1.

$^1\text{H}$  NMR (400 MHz, Chloroform-*d*)  $\delta$  8.39 (d,  $J = 3.7$  Hz, 1H), 7.64 (d,  $J = 7.9$  Hz, 2H), 7.54 (d,  $J = 7.6$  Hz, 2H), 7.44 (t,  $J = 7.4$  Hz, 1H), 7.40 – 7.27 (m, 6H), 7.25 – 7.18 (m,

3H), 7.17 – 7.05 (m, 5H), 6.23 (dt,  $J = 16.2, 12.2$  Hz, 1H), 4.75 (br, 2H), 2.10 (br, 3H).  $^{13}\text{C}$  NMR (101 MHz, Chloroform- $d$ )  $\delta$  170.3, 149.6, 148.7, 140.5, 139.7, 139.7 – 139.4 (m), 138.8, 138.1, 137.7, 136.6, 136.5, 134.9, 133.6, 133.0, 130.4, 130.3, 129.84, 128.80, 128.78, 128.76, 128.7, 128.6, 127.62, 127.60, 124.8, 122.7, 114.6 (t,  $J_{\text{C-F}} = 22.9$  Hz), 50.8, 20.2.  $^{19}\text{F}$  NMR (376 MHz, Chloroform- $d$ )  $\delta$  -80.7 (t,  $J = 9.7$  Hz), -110.9 (q,  $J = 13.0$  Hz), -121.4 – -121.6 (m), -122.80 (br), -122.9 – -123.1 (m), -126.0 – -126.1 (m). HRMS ( $m/z$ , ESI-TOF): Calcd for  $\text{C}_{40}\text{H}_{26}\text{ClF}_{13}\text{N}_2\text{O}_3\text{SNa}^+$  [ $\text{M}+\text{Na}^+$ ] 919.1037, found 919.1027.

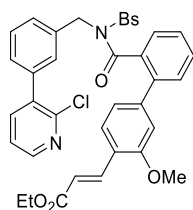

**Ethyl (E)-3-(2'-((3-(2-chloropyridin-3-yl)benzyl)(phenylsulfonyl)carbamoyl)-3-methoxy-[1,1'-biphenyl]-4-yl)acrylate (6g)**

The general procedure **B** was followed (**2** (2.0 equiv), HFIP (1.5 mL), 90 °C). Conversion: 60 %. Yield: 35.3 mg (53%),  $p$ : others > 20:1.

$^1\text{H}$  NMR (400 MHz, Chloroform- $d$ )  $\delta$  8.40 (dd,  $J = 4.8, 1.9$  Hz, 1H), 7.99 (d,  $J = 16.2$  Hz, 1H), 7.69 – 7.56 (m, 3H), 7.52 (dd,  $J = 7.6, 2.0$  Hz, 1H), 7.47 – 7.34 (m, 5H), 7.34 – 7.19 (m, 4H), 7.10 (dd,  $J = 7.7, 1.2$  Hz, 1H), 7.02 – 7.00 (m, 2H), 6.90 (dd,  $J = 7.8, 1.6$  Hz, 1H), 6.84 (s, 1H), 6.59 (d,  $J = 16.1$  Hz, 1H), 4.71 (br, 2H), 4.31 (q,  $J = 7.1$  Hz, 2H), 3.69 (s, 3H), 1.38 (t,  $J = 7.1$  Hz, 3H).  $^{13}\text{C}$  NMR (101 MHz, Chloroform- $d$ )  $\delta$  170.8, 167.6, 158.1, 149.6, 148.7, 142.1, 139.7, 139.5, 138.8, 138.5, 137.6, 136.5, 136.4, 134.0, 133.8, 130.6, 129.7, 129.3, 128.8, 128.71, 128.66, 128.6, 128.4, 128.0, 127.8, 127.5, 123.0, 122.7, 120.8, 119.4, 60.6, 55.5, 50.7, 14.5. HRMS ( $m/z$ , ESI-TOF): Calcd for  $\text{C}_{37}\text{H}_{31}\text{ClN}_2\text{O}_6\text{SNa}^+$  [ $\text{M}+\text{Na}^+$ ] 689.1484, found 689.1481.

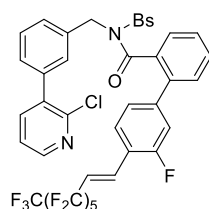

**(E)-N-(3-(2-chloropyridin-3-yl)benzyl)-3'-fluoro-N-(phenylsulfonyl)-4'-(3,3,4,4,5,5,6,6,7,7,8,8,8-tridecafluorooct-1-en-1-yl)-[1,1'-biphenyl]-2-carboxamide (6h)**

The general procedure **B** was followed (**2** (3.0 equiv), HFIP (1.0 mL), 100 °C).

Conversion: 70 %. Yield: 45.0 mg (50%), *p*: others > 20:1.

<sup>1</sup>H NMR (400 MHz, Chloroform-*d*) δ 8.41 (dd, *J* = 4.8, 1.9 Hz, 1H), 7.69 (d, *J* = 7.8 Hz, 2H), 7.60 (t, *J* = 7.4 Hz, 1H), 7.54 (dd, *J* = 7.6, 2.0 Hz, 1H), 7.50 – 7.39 (m, 3H), 7.37 – 7.24 (m, 7H), 7.14 – 7.01 (m, 5H), 6.38 (dt, *J* = 16.3, 11.9 Hz, 1H), 4.75 (br, 2H). <sup>13</sup>C NMR (101 MHz, Chloroform-*d*) δ 170.4, 160.7 (d, *J*<sub>C-F</sub> = 254.6 Hz), 149.6, 148.7, 142.8 (d, *J*<sub>C-F</sub> = 8.4 Hz), 139.7, 138.8, 137.8, 137.23, 137.22, 136.43, 136.39, 134.1, 133.9, 132.4 (t, *J*<sub>C-F</sub> = 9.9 Hz), 130.8, 129.7, 129.2 (d, *J*<sub>C-F</sub> = 2.4 Hz), 128.9, 128.80, 128.78, 128.7, 128.2, 128.1, 127.8, 125.2 (d, *J*<sub>C-F</sub> = 3.1 Hz), 122.7, 120.9 (d, *J*<sub>C-F</sub> = 11.4 Hz), 117.5 (td, *J*<sub>C-F</sub> = 23.1, 7.1 Hz), 116.8 (d, *J*<sub>C-F</sub> = 23.0 Hz), 50.6. <sup>19</sup>F NMR (376 MHz, Chloroform-*d*) δ -80.8 (t, *J* = 9.9 Hz), -111.6 (q, *J* = 12.8 Hz), -113.7 – -113.8 (m), -121.5 – -121.6 (m), -122.7 – -122.8 (m), -123.0 – -123.1 (m), -128.0 – -128.2 (m). HRMS (*m/z*, ESI-TOF): Calcd for C<sub>39</sub>H<sub>23</sub>ClF<sub>14</sub>N<sub>2</sub>O<sub>3</sub>SNa<sup>+</sup> [*M*+Na<sup>+</sup>] 923.0787, found 923.0784.

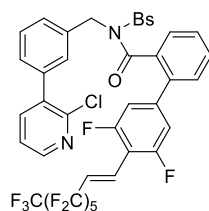

**(*E*)-*N*-(3-(2-chloropyridin-3-yl)benzyl)-3',5'-difluoro-*N*-(phenylsulfonyl)-4'-(3,3,4,4,5,5,6,6,7,7,8,8,8-tridecafluorooct-1-en-1-yl)-[1,1'-biphenyl]-2-carboxamide (**6i**)**

The general procedure **B** was followed (**2** (3.0 equiv), HFIP (1.0 mL), 100 °C). Conversion: 55 %. Yield: 45.9 mg (50%), *p*: others > 20:1.

<sup>1</sup>H NMR (400 MHz, Chloroform-*d*) δ 8.40 (dd, *J* = 4.8, 1.9 Hz, 1H), 7.67 (d, *J* = 7.8 Hz, 2H), 7.59 (t, *J* = 7.4 Hz, 1H), 7.55 (dd, *J* = 7.5, 1.9 Hz, 1H), 7.47 (t, *J* = 7.7 Hz, 1H), 7.42 (t, *J* = 7.8 Hz, 2H), 7.37 – 7.27 (m, 5H), 7.22 (dt, *J* = 17.2, 2.6 Hz, 1H), 7.17 – 7.07 (m, 3H), 6.86 (d, *J* = 9.4 Hz, 2H), 6.60 (dt, *J* = 16.5, 11.9 Hz, 1H), 4.82 (br, 2H). <sup>13</sup>C NMR (101 MHz, Chloroform-*d*) δ 170.1, 160.9 (dd, *J*<sub>C-F</sub> = 255.6, 7.4 Hz), 149.6, 148.7, 142.8 (t, *J*<sub>C-F</sub> = 10.9 Hz), 139.7, 138.8, 137.8, 136.6, 136.4, 136.2, 134.2, 134.1, 130.8, 129.6, 128.98, 128.96, 128.9, 128.7, 128.6, 128.4, 128.0, 127.9, 126.1 (t, *J*<sub>C-F</sub> = 10.8 Hz), 122.7, 112.7 (dd, *J*<sub>C-F</sub> = 25.6, 14.1 Hz), 110.7 (t, *J*<sub>C-F</sub> = 14.8 Hz), 50.5. <sup>19</sup>F NMR (376 MHz, Chloroform-*d*) δ -80.8 (t, *J* = 9.9 Hz), -109.9 (d, *J* = 9.9 Hz), -112.4 (q, *J* = 12.5 Hz), -121.37 – -121.74 (m), -122.7 – -122.9 (m), -123.0 – -123.1 (m), -

126.1 – 126.2 (m). HRMS (m/z, ESI-TOF): Calcd for C<sub>39</sub>H<sub>22</sub>ClF<sub>15</sub>N<sub>2</sub>O<sub>3</sub>SNa<sup>+</sup> [M+Na<sup>+</sup>] 941.0692, found 941.0689.

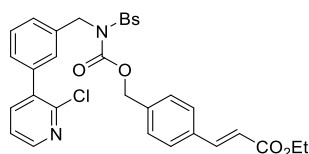

**Ethyl (*E*)-3-(4-(((3-(2-chloropyridin-3-yl)benzyl)(phenylsulfonyl)carbamoyl)oxy)-methyl)phenyl)acrylate (**6j**)**

The general procedure **B** was followed (**2** (2.0 equiv), HFIP (1.5 mL), 90 °C). Conversion: 75 %. Yield: 37.2 mg (63%), *p*: others = 8:1.

<sup>1</sup>H NMR (400 MHz, Chloroform-*d*) δ 8.31 (dd, *J* = 4.9, 1.9 Hz, 1H), 7.59 – 7.51 (m, 3H), 7.49 (dd, *J* = 7.6, 1.9 Hz, 1H), 7.43 (t, *J* = 7.5 Hz, 1H), 7.38 (dt, *J* = 5.9, 3.1 Hz, 1H), 7.36 – 7.32 (m, 3H), 7.30 (d, *J* = 8.0 Hz, 2H), 7.25 – 7.17 (m, 3H), 7.02 (d, *J* = 7.9 Hz, 2H), 6.33 (d, *J* = 16.0 Hz, 1H), 5.05 (s, 2H), 5.01 (s, 2H), 4.19 (q, *J* = 7.1 Hz, 2H), 1.26 (t, *J* = 7.1 Hz, 3H). <sup>13</sup>C NMR (101 MHz, Chloroform-*d*) δ 167.0, 152.4, 149.7, 148.7, 143.8, 139.8, 139.2, 137.9, 137.2, 136.7, 136.5, 134.9, 133.7, 129.3, 129.1, 128.83, 128.80, 128.6, 128.4, 128.3, 122.7, 119.2, 68.8, 60.8, 50.0, 14.5. HRMS (m/z, ESI-TOF): Calcd for C<sub>31</sub>H<sub>27</sub>ClN<sub>2</sub>O<sub>6</sub>SNa<sup>+</sup> [M+Na<sup>+</sup>] 613.1171, found 613.1170.

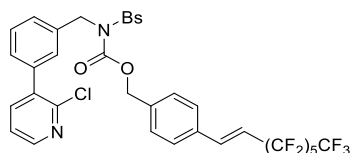

**(*E*)-4-(3,3,4,4,5,5,6,6,7,7,8,8,8-tridecafluorooct-1-en-1-yl)benzyl (3-(2-chloropyridin-3-yl)benzyl)(phenylsulfonyl)carbamate (**6k**)**

The general procedure **B** was followed (**2** (3.0 equiv), HFIP (1.0 mL), 100 °C). Conversion: 90 %. Yield: 66.9 mg (80%), *p*: others = 10:1.

<sup>1</sup>H NMR (400 MHz, Chloroform-*d*) δ 8.39 (dd, *J* = 4.7, 2.0 Hz, 1H), 7.66 (d, *J* = 7.9 Hz, 2H), 7.58 (dd, *J* = 7.6, 2.0 Hz, 1H), 7.52 (t, *J* = 7.5 Hz, 1H), 7.49 – 7.40 (m, 4H), 7.36 – 7.28 (m, 5H), 7.17 – 7.10 (m, 3H), 6.19 (dt, *J* = 16.3, 12.2 Hz, 1H), 5.14 (s, 2H), 5.10 (s, 2H). <sup>13</sup>C NMR (101 MHz, Chloroform-*d*) δ 152.3, 149.7, 148.6, 139.8, 139.2, 139.1 (t, *J*<sub>C-F</sub> = 9.7 Hz), 137.9, 137.1, 136.7, 136.6, 133.8, 133.7, 129.3, 129.1, 128.9, 128.80, 128.78, 128.6, 128.4, 127.9, 122.7, 115.2 (t, *J*<sub>C-F</sub> = 23.0 Hz), 68.6, 50.0. <sup>19</sup>F NMR (376 MHz, Chloroform-*d*) δ -80.8 (t, *J* = 9.9 Hz), -111.2 (q, *J* = 12.9, 12.3 Hz), -121.6 – -121.7 (m), -122.8 – -122.9 (m), -123.0 – -123.2 (m), -126.0 – -126.2 (m).

HRMS (m/z, ESI-TOF): Calcd for C<sub>34</sub>H<sub>22</sub>ClF<sub>13</sub>N<sub>2</sub>O<sub>4</sub>SNa<sup>+</sup> [M+Na<sup>+</sup>] 859.0673, found 859.0668.

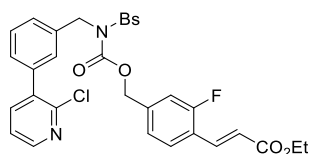

**Ethyl (*E*)-3-(4-(((3-(2-chloropyridin-3-yl)benzyl)(phenylsulfonyl)carbamoyloxy)-methyl)-2-fluorophenyl)acrylate (**6l**)**

The general procedure **B** was followed (**2** (2.0 equiv), HFIP (1.5 mL), 90 °C). Conversion: 90 %. Yield: 45.6 mg (75%), *p*: others > 20:1.

<sup>1</sup>H NMR (400 MHz, Chloroform-*d*) δ 8.39 (dd, *J* = 4.8, 1.9 Hz, 1H), 7.72 (d, *J* = 16.2 Hz, 1H), 7.66 (d, *J* = 7.7 Hz, 2H), 7.59 (dd, *J* = 7.7, 2.0 Hz, 1H), 7.54 (t, *J* = 7.1 Hz, 1H), 7.50 – 7.31 (m, 7H), 7.29 (dd, *J* = 7.6, 4.8 Hz, 1H), 6.89 (d, *J* = 8.0 Hz, 1H), 6.72 (d, *J* = 10.9 Hz, 1H), 6.50 (d, *J* = 16.2 Hz, 1H), 5.15 (s, 2H), 5.07 (s, 2H), 4.27 (q, *J* = 7.1 Hz, 2H), 1.34 (t, *J* = 7.2 Hz, 3H). <sup>13</sup>C NMR (101 MHz, Chloroform-*d*) δ 166.7, 161.1 (d, *J*<sub>C-F</sub> = 254.8 Hz), 152.2, 149.7, 148.6, 139.7, 139.2, 138.6 (d, *J*<sub>C-F</sub> = 8.4 Hz), 137.9, 137.0, 136.51 (d, *J*<sub>C-F</sub> = 11.1 Hz), 136.48, 133.8, 129.3 (d, *J*<sub>C-F</sub> = 3.2 Hz), 129.2, 129.1, 128.9, 128.8, 128.5, 128.3, 123.9 (d, *J*<sub>C-F</sub> = 3.4 Hz), 122.7 (d, *J*<sub>C-F</sub> = 12.0 Hz), 122.7, 121.6 (d, *J*<sub>C-F</sub> = 6.6 Hz), 115.6 (d, *J*<sub>C-F</sub> = 23.1 Hz), 67.8, 60.8, 50.1, 14.4. HRMS (m/z, ESI-TOF): Calcd for C<sub>31</sub>H<sub>26</sub>ClF<sub>12</sub>N<sub>2</sub>O<sub>6</sub>SNa<sup>+</sup> [M+Na<sup>+</sup>] 631.1076, found 631.1075.

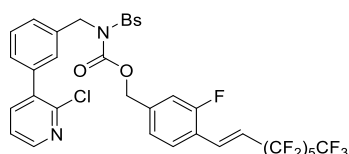

**(*E*)-3-fluoro-4-(3,3,4,4,5,5,6,6,7,7,8,8,8-tridecafluorooct-1-en-1-yl)benzyl (3-(2-chloropyridin-3-yl)benzyl)(phenylsulfonyl)carbamate (**6m**)**

The general procedure **B** was followed (**2** (3.0 equiv), HFIP (1.0 mL), 100 °C). Conversion: 90 %. Yield: 70.9 mg (83%), *p*: others > 20:1.

<sup>1</sup>H NMR (400 MHz, Chloroform-*d*) δ 8.39 (d, *J* = 4.5 Hz, 1H), 7.68 (d, *J* = 7.8 Hz, 2H), 7.60 (d, *J* = 7.4 Hz, 1H), 7.55 (t, *J* = 7.2 Hz, 1H), 7.51 – 7.41 (m, 4H), 7.40 – 7.34 (m, 3H), 7.29 (dd, *J* = 7.4, 4.8 Hz, 1H), 7.22 (d, *J* = 16.3 Hz, 1H), 6.94 (d, *J* = 8.0 Hz, 1H), 6.76 (d, *J* = 11.1 Hz, 1H), 6.33 (dt, *J* = 16.0, 12.0 Hz, 1H), 5.16 (s, 2H), 5.09 (s, 2H). <sup>13</sup>C NMR (101 MHz, Chloroform-*d*) δ 160.9 (d, *J*<sub>C-F</sub> = 254.3 Hz), 152.2, 149.7, 148.7, 139.7, 139.2, 138.9 (d, *J*<sub>C-F</sub> = 8.2 Hz), 138.0, 137.1, 136.6, 133.8, 132.2 (t, *J*<sub>C-F</sub> = 10.1



Hz), 129.3, 129.2, 129.1, 128.9, 128.8, 128.5, 128.4, 124.0 (d,  $J_{C-F} = 3.5$  Hz), 122.7, 121.7 (d,  $J_{C-F} = 11.9$  Hz), 117.8 (td,  $J_{C-F} = 23.2, 8.1$  Hz), 115.7 (d,  $J_{C-F} = 23.0$  Hz), 67.8 (d,  $J_{C-F} = 1.5$  Hz), 50.1.  $^{19}\text{F}$  NMR (376 MHz, Chloroform-*d*)  $\delta$  -80.8 (t,  $J = 10.0$  Hz), -111.7 (q,  $J = 12.5, 12.0$  Hz), -114.3 (dd,  $J = 11.0, 7.4$  Hz), -121.4 – -121.7 (m), -122.7 – -123.0 (m), -123.1 – -123.2 (m), -126.1 – -126.2 (m). HRMS (m/z, ESI-TOF): Calcd for  $\text{C}_{34}\text{H}_{21}\text{ClF}_{14}\text{N}_2\text{O}_4\text{SNa}^+$  [ $\text{M}+\text{Na}^+$ ] 877.0579, found 877.0576.

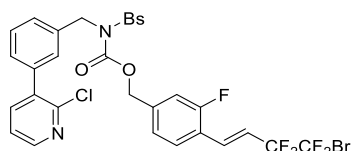

**(*E*)-4-(4-bromo-3,3,4,4-tetrafluorobut-1-en-1-yl)-3-fluorobenzyl (3-(2-chloropyridin-3-yl)benzyl)(phenylsulfonyl)carbamate (6n)**

The general procedure **B** was followed (**2** (3.0 equiv), HFIP (1.0 mL), 100 °C). Conversion: 84 %. Yield: 53.6 mg (75%), *p*: others = 10:1.

$^1\text{H}$  NMR (400 MHz, Chloroform-*d*)  $\delta$  8.39 (dd,  $J = 4.7, 2.0$  Hz, 1H), 7.68 (d,  $J = 8.0$  Hz, 2H), 7.61 – 7.52 (m, 2H), 7.49 – 7.41 (m, 4H), 7.41 – 7.34 (m, 3H), 7.29 (dd,  $J = 7.5, 4.7$  Hz, 1H), 7.23 (dt,  $J = 16.5, 2.5$  Hz, 1H), 6.92 (d,  $J = 8.0$  Hz, 1H), 6.75 (d,  $J = 10.9$  Hz, 1H), 6.35 (dt,  $J = 16.2, 11.6$  Hz, 1H), 5.15 (s, 2H), 5.08 (s, 2H).  $^{13}\text{C}$  NMR (101 MHz, Chloroform-*d*)  $\delta$  160.8 (d,  $J_{C-F} = 254.2$  Hz), 152.2, 149.7, 148.6, 139.7, 139.2, 138.7 (d,  $J_{C-F} = 8.2$  Hz), 137.9, 137.0, 136.6, 133.8, 132.2 (td,  $J_{C-F} = 10.4, 9.9, 2.8$  Hz), 129.20, 129.15, 129.1, 128.9, 128.8, 128.5, 128.4, 123.9 (d,  $J_{C-F} = 3.5$  Hz), 122.7, 121.8 (d,  $J_{C-F} = 11.5$  Hz), 117.8 (td,  $J_{C-F} = 23.9, 7.2$  Hz), 115.7 (d,  $J_{C-F} = 23.1$  Hz), 67.8, 50.1.  $^{19}\text{F}$  NMR (376 MHz, Chloroform-*d*)  $\delta$  -65.7 (t,  $J = 6.4$  Hz), -109.5 (dt,  $J = 12.1, 6.7$  Hz), -114.4 (dd,  $J = 11.1, 7.4$  Hz). HRMS (m/z, ESI-TOF): Calcd for  $\text{C}_{30}\text{H}_{21}\text{BrClF}_5\text{N}_2\text{O}_4\text{SNa}^+$  [ $\text{M}+\text{Na}^+$ ] 736.9906, found 736.9905.

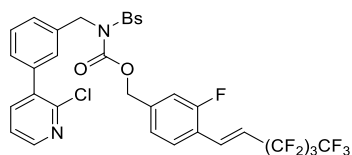

**(*E*)-3-fluoro-4-(3,3,4,4,5,5,6,6,6-nonafluorohex-1-en-1-yl)benzyl (3-(2-chloropyridin-3-yl)benzyl)(phenylsulfonyl)carbamate (6o)**

The general procedure **B** was followed (**2** (3.0 equiv), HFIP (1.0 mL), 100 °C). Conversion: 84 %. Yield: 58.8 mg (78%), *p*: others = 10:1.

$^1\text{H}$  NMR (400 MHz, Chloroform-*d*)  $\delta$  8.39 (dd,  $J = 4.8, 1.9$  Hz, 1H), 7.68 (d,  $J = 7.9$  Hz, 2H), 7.60 (dd,  $J = 7.5, 2.0$  Hz, 1H), 7.55 (t,  $J = 7.4$  Hz, 1H), 7.50 – 7.41 (m, 4H), 7.41 – 7.34 (m, 3H), 7.29 (dd,  $J = 7.5, 4.7$  Hz, 1H), 7.22 (dt,  $J = 16.4, 2.6$  Hz, 1H), 6.93 (d,  $J = 8.0$  Hz, 1H), 6.76 (d,  $J = 11.0$  Hz, 1H), 6.33 (dt,  $J = 16.3, 12.0$  Hz, 1H), 5.15 (s, 2H), 5.09 (s, 2H).  $^{13}\text{C}$  NMR (101 MHz, Chloroform-*d*)  $\delta$  160.9 (d,  $J_{\text{C-F}} = 254.5$  Hz), 152.2, 149.7, 148.7, 139.7, 139.2, 138.9 (d,  $J_{\text{C-F}} = 8.2$  Hz), 138.0, 137.0, 136.6, 133.8, 132.4 – 132.1 (m), 129.3 (d,  $J_{\text{C-F}} = 2.9$  Hz), 129.2, 129.1, 128.9, 128.8, 128.5, 128.4, 124.0 (d,  $J_{\text{C-F}} = 3.4$  Hz), 122.7, 121.7 (d,  $J_{\text{C-F}} = 11.9$  Hz), 117.7 (td,  $J_{\text{C-F}} = 23.1, 6.9$  Hz), 115.7 (d,  $J_{\text{C-F}} = 23.0$  Hz), 67.8, 50.1.  $^{19}\text{F}$  NMR (376 MHz, Chloroform-*d*)  $\delta$  -80.5 – -81.5 (m), -112.0 (t,  $J = 12.1$  Hz), -114.3 (dd,  $J = 11.1, 7.5$  Hz), -124.0 (q,  $J = 9.4$  Hz), -125.6 – -125.8 (m). HRMS ( $m/z$ , ESI-TOF): Calcd for  $\text{C}_{32}\text{H}_{21}\text{ClF}_{10}\text{N}_2\text{O}_4\text{SNa}^+$  [ $\text{M}+\text{Na}^+$ ] 777.0643, found 777.0635.

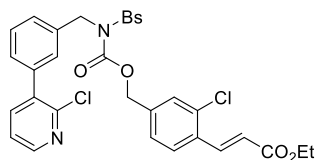

**ethyl (E)-3-(2-chloro-4-(((3-(2-chloropyridin-3-yl)benzyl)(phenylsulfonyl)carbamoyloxy)methyl)phenyl)acrylate (6p)**

The general procedure **B** was followed (**2** (2.0 equiv), HFIP (1.5 mL), 90 °C). Conversion: 60 %. Yield: 33.1 mg (53%), *p*: others > 20:1.

$^1\text{H}$  NMR (400 MHz, Chloroform-*d*)  $\delta$  8.39 (dd,  $J = 4.8, 1.9$  Hz, 1H), 8.00 (d,  $J = 16.0$  Hz, 1H), 7.65 (d,  $J = 7.8$  Hz, 2H), 7.59 (dd,  $J = 7.6, 1.9$  Hz, 1H), 7.54 (t,  $J = 7.4$  Hz, 1H), 7.50 – 7.40 (m, 5H), 7.36 (t,  $J = 7.7$  Hz, 2H), 7.29 (dd,  $J = 7.5, 4.7$  Hz, 1H), 7.06 (s, 1H), 7.00 (d,  $J = 8.0$  Hz, 1H), 6.40 (d,  $J = 16.0$  Hz, 1H), 5.14 (s, 2H), 5.05 (s, 2H), 4.28 (q,  $J = 7.1$  Hz, 2H), 1.35 (t,  $J = 7.1$  Hz, 3H).  $^{13}\text{C}$  NMR (101 MHz, Chloroform-*d*)  $\delta$  166.4, 152.2, 149.7, 148.7, 139.7, 139.6, 139.2, 137.9, 137.7, 137.0, 136.6, 135.0, 133.8, 133.0, 129.6, 129.2, 129.1, 128.9, 128.8, 128.5, 128.3, 127.8, 126.8, 122.7, 121.7, 67.8, 60.9, 50.1, 14.4. HRMS ( $m/z$ , ESI-TOF): Calcd for  $\text{C}_{31}\text{H}_{27}\text{Cl}_2\text{N}_2\text{O}_6\text{S}^+$  [ $\text{M}+\text{H}^+$ ] 625.0961, found 625.0973.

## 2.6 Scaled-up Reactions

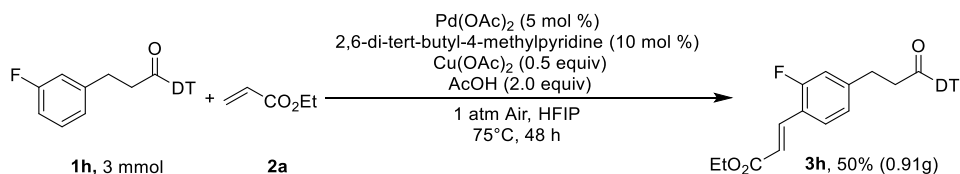

An oven-dried Schlenk tube (1000 mL) was charged with a magnetic stir bar, under air atmosphere, **1h** (3.0 mmol, 1.0 equiv), **2a** (9.0 mmol, 3.0 equiv), Pd(OAc)<sub>2</sub> (0.15 mmol, 5 mol %), Cu(OAc)<sub>2</sub> (1.5 mmol, 0.5 equiv), 2,6-di-tert-butyl-4-methylpyridine (0.30 mmol, 10 mol %), AcOH (6.0 mmol, 2.0 equiv), HFIP (45 mL) were added. The reaction mixture was stirred vigorously on a preheated hotplate (75 °C) for 48 h and then cooled down to room temperature. After removal of HFIP under reduced pressure, then diluted with EtOAc (200 mL) and filtered through a short pad of Celite and neutral alumina. The sealed tube and Celite and neutral alumina pad were washed with an additional 150 mL EtOAc. The resulting residue was purified by flash silica gel chromatography using petroleum ether/EtOAc (5:1-3:1) as the eluent to give **3h**. (50 %, 0.91g)

## 2.7 Synthetic Applications and Hydrolysis

### Synthesis of 10a:

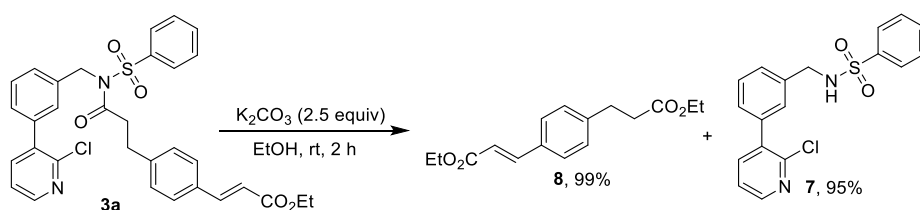

To a solution of **3a** (0.7 mmol, 1.0 equiv) and K<sub>2</sub>CO<sub>3</sub> (1.75 mmol, 2.5 equiv) in EtOH (7 mL) at room temperature stirred for 2 h. Then volatile matter was removed under reduced pressure. Then the crude reaction mixture was extracted with EtOAc and water, the combined organic phase was dried over anhydrous Na<sub>2</sub>SO<sub>4</sub> and concentrated under reduced pressure. The resulting residue was purified by flash silica gel chromatography using petroleum ether/EtOAc (10:1-2:1) as the eluent to give **7** (yield: 95%) and **ethyl (E)-3-(4-(3-ethoxy-3-oxopropyl)phenyl)acrylate (8)**. (yield: 99%) <sup>1</sup>H NMR (400 MHz, Chloroform-*d*) δ 7.66 (d, *J* = 16.0 Hz, 1H), 7.45 (d, *J* = 7.9 Hz, 2H),

7.22 (d,  $J = 7.9$  Hz, 2H), 6.40 (d,  $J = 16.0$  Hz, 1H), 4.26 (q,  $J = 7.1$  Hz, 2H), 4.12 (q,  $J = 7.1$  Hz, 2H), 2.96 (t,  $J = 7.7$  Hz, 2H), 2.62 (t,  $J = 7.7$  Hz, 2H), 1.33 (t,  $J = 7.1$  Hz, 3H), 1.23 (t,  $J = 7.1$  Hz, 3H).  $^{13}\text{C}$  NMR (101 MHz, Chloroform- $d$ )  $\delta$  172.8, 167.3, 144.5, 143.3, 132.7, 129.0, 128.4, 117.8, 60.7, 60.6, 35.7, 30.9, 14.5, 14.3. HRMS ( $m/z$ , ESI-TOF): Calcd for  $\text{C}_{16}\text{H}_{20}\text{O}_4\text{Na}^+$  [ $\text{M}+\text{Na}^+$ ] 299.1254, found 299.1254.

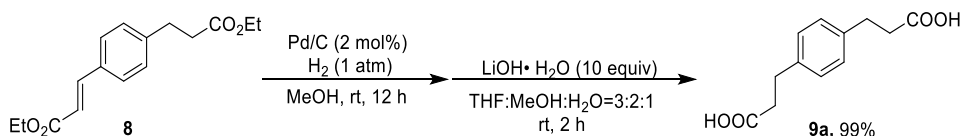

To a solution of **8** (0.6 mmol, 1.0 equiv), Pd/C (0.012 mmol, 2 mol %), MeOH (10 mL) under  $\text{H}_2$  atmosphere at room temperature stirred for 12 h. Then the crude reaction mixture was extracted with EtOAc and water, the combined organic phase was dried over anhydrous  $\text{Na}_2\text{SO}_4$  and concentrated under reduced pressure. The residue was used in the next step without further purification.

To a solution of the residue above and LiOH· $\text{H}_2\text{O}$  (6.0 mmol, 10 equiv) in THF:MeOH: $\text{H}_2\text{O}$  (6:4:2 mL) at room temperature stirred for 2 h. Then volatile matter was removed under reduced pressure. Then the crude reaction mixture was extracted with EtOAc and water, The combined water phase was added 1N HCl until  $\text{pH} \approx 1$ , then filtered to give the **9a**. (yield: 99%)  $^1\text{H}$  NMR (400 MHz, DMSO- $d_6$ )  $\delta$  12.12 (br, 2H), 7.12 (s, 4H), 2.77 (t,  $J = 7.6$  Hz, 4H), 2.54 – 2.47 (m, 4H).  $^{13}\text{C}$  NMR (101 MHz, DMSO- $d_6$ )  $\delta$  173.9, 138.5, 128.2, 35.1, 30.0. HRMS ( $m/z$ , ESI-TOF): Calcd for  $\text{C}_{12}\text{H}_{13}\text{O}_4^-$  [ $\text{M}-\text{H}^-$ ] 221.0819, found 221.0819.

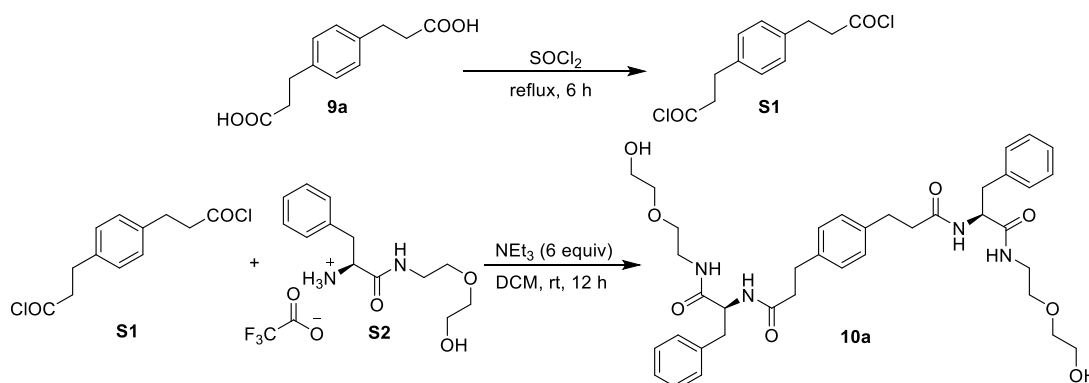

A suspension of **9a** (44.4 mg, 0.20 mmol) in freshly distilled thionyl chloride (3 mL) was gently refluxed to complete solution of the solid (6 h). After evaporation under vacuum the residue was pumped to dryness and without further purification.

To a solution of **S2** (0.6 mmol, 3.0 equiv), triethylamine (1.2 mmol, 6.0 equiv.), DCM (10 mL) under N<sub>2</sub> atmosphere at room temperature stirred for 0.5 h. Then **S1** was added and stirred for another 12 h. Then the crude reaction mixture was extracted with EtOAc and water, the combined organic phase was dried over anhydrous Na<sub>2</sub>SO<sub>4</sub> and concentrated under reduced pressure. The resulting residue was purified by preparative thin layer chromatography using EtOAc/MeOH (20:1-5:1) as the eluent to give the **10a**<sup>2</sup>. (yield: 50%) <sup>1</sup>H NMR (400 MHz, DMSO-*d*<sub>6</sub>) δ 8.21 (d, *J* = 8.5 Hz, 2H), 8.09 (t, *J* = 5.6 Hz, 2H), 7.26 – 7.16 (m, 10H), 6.98 (s, 4H), 4.69 (t, *J* = 5.5 Hz, 2H), 4.48 (td, *J* = 9.0, 4.9 Hz, 2H), 3.49 (d, *J* = 5.2 Hz, 4H), 3.37 – 3.30 (m, 8H), 3.20 (p, *J* = 6.9 Hz, 4H), 2.95 (dd, *J* = 13.7, 5.0 Hz, 2H), 2.76 (dd, *J* = 13.6, 9.5 Hz, 2H), 2.62 (t, *J* = 7.9 Hz, 4H), 2.32 (t, *J* = 7.8 Hz, 4H). <sup>13</sup>C NMR (101 MHz, DMSO-*d*<sub>6</sub>) δ 171.4, 171.3, 138.7, 138.0, 129.2, 128.02, 128.00, 126.2, 72.2, 68.9, 60.2, 54.0, 38.6, 37.9, 36.9, 30.7. HRMS (*m/z*, ESI-TOF): Calcd for C<sub>38</sub>H<sub>50</sub>N<sub>4</sub>O<sub>8</sub>Na<sup>+</sup> [*M*+Na<sup>+</sup>] 713.3521, found 713.3521.

### Synthesis of 10b:

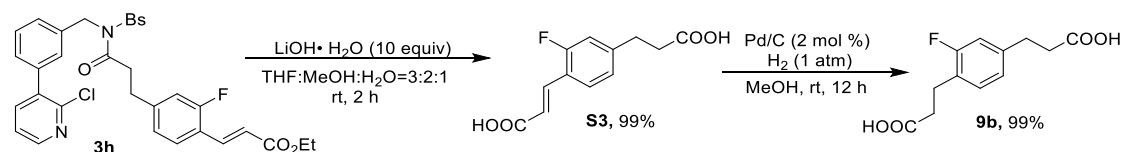

To a solution of **3h** (1.5 mmol, 1.0 equiv) and LiOH·H<sub>2</sub>O (15 mmol, 10 equiv) in THF:MeOH:H<sub>2</sub>O (9:6:3 mL) at room temperature stirred for 2 h. Then volatile matter was removed under reduced pressure. Then the crude reaction mixture was extracted with EtOAc and water, The combined water phase was added 1N HCl until pH ≈ 1, then filtered to give **S3**. (yield: 99%) <sup>1</sup>H NMR (400 MHz, DMSO-*d*<sub>6</sub>) δ 7.74 (t, *J* = 8.0 Hz, 1H), 7.62 (d, *J* = 16.1 Hz, 1H), 7.18 (d, *J* = 12.1 Hz, 1H), 7.13 (d, *J* = 8.1 Hz, 1H), 6.55 (d, *J* = 16.1 Hz, 1H), 2.85 (t, *J* = 7.5 Hz, 2H), 2.57 (t, *J* = 7.5 Hz, 2H). <sup>13</sup>C NMR (101 MHz, DMSO-*d*<sub>6</sub>) δ 173.6, 167.4, 160.5 (d, *J*<sub>C-F</sub> = 250.7 Hz), 146.4 (d, *J*<sub>C-F</sub> = 8.4 Hz), 135.8 (d, *J*<sub>C-F</sub> = 3.2 Hz), 129.1 (d, *J*<sub>C-F</sub> = 3.2 Hz), 125.1 (d, *J*<sub>C-F</sub> = 2.9 Hz), 121.0 (d, *J*<sub>C-F</sub> = 5.6 Hz), 119.6 (d, *J*<sub>C-F</sub> = 11.5 Hz), 115.8 (d, *J*<sub>C-F</sub> = 21.9 Hz), 34.5, 30.0. HRMS (*m/z*, ESI-TOF): Calcd for C<sub>12</sub>H<sub>10</sub>FO<sub>4</sub><sup>-</sup> [*M*-H<sup>-</sup>] 237.0569, found 237.0569.

To a solution of **S3** (1.0 mmol, 1.0 equiv), Pd/C (0.02 mmol, 2 mol %), MeOH (10 mL) under H<sub>2</sub> atmosphere at room temperature stirred for 12 h. Then filtered and concentrated under reduced pressure to give **9b**. (yield: 99%) <sup>1</sup>H NMR (400 MHz, DMSO-*d*<sub>6</sub>) δ 7.19 (t, *J* = 8.0 Hz, 1H), 7.02 – 6.96 (m, 2H), 2.85 – 2.73 (m, 4H), 2.54 –

2.48 (m, 4H).  $^{13}\text{C}$  NMR (101 MHz,  $\text{DMSO-}d_6$ )  $\delta$  173.8, 173.6, 160.4 (d,  $J = 243.0$  Hz), 141.6 (d,  $J = 7.6$  Hz), 130.4 (d,  $J = 5.3$  Hz), 124.9 (d,  $J = 15.7$  Hz), 124.2 (d,  $J = 2.9$  Hz), 114.9 (d,  $J = 21.8$  Hz), 35.0, 33.9, 29.8, 23.5. HRMS (m/z, ESI-TOF): Calcd for  $\text{C}_{12}\text{H}_{12}\text{FO}_4^-$  [ $\text{M-H}^-$ ] 239.0725, found 239.0595.

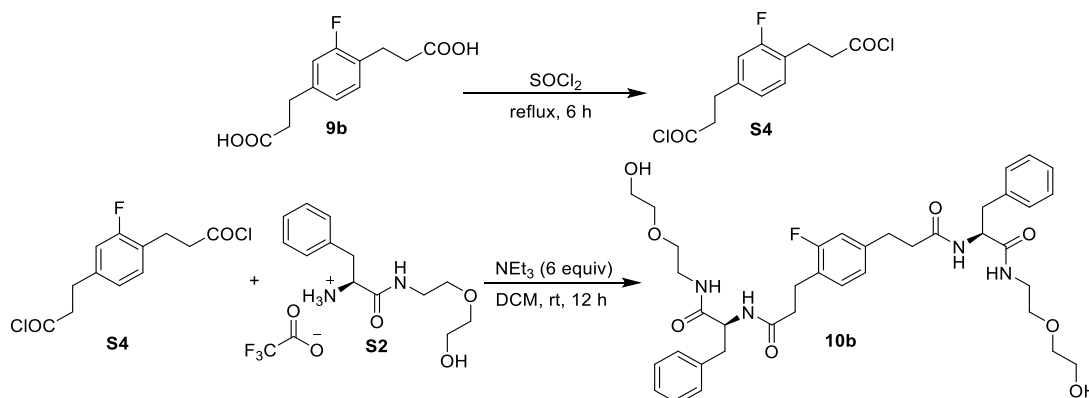

A suspension of **9b** (48 mg, 0.20 mmol) in freshly distilled thionyl chloride (3 mL) was gently refluxed to complete solution of the solid (6 h). After evaporation under vacuum the residue was pumped to dryness and without further purification.

To a solution of **S2**<sup>2</sup> (0.6 mmol, 3.0 equiv), triethylamine (1.2 mmol, 6.0 equiv), DCM (10 mL) under  $\text{N}_2$  atmosphere at room temperature stirred for 0.5 h. Then the **S4** was added and stirred for another 12 h. Then the crude reaction mixture was extracted with EtOAc and water, the combined organic phase was dried over anhydrous  $\text{Na}_2\text{SO}_4$  and concentrated under reduced pressure. The resulting residue was purified by preparative thin layer chromatography using EtOAc/MeOH (20:1-5:1) as the eluent to give the **10b**. (yield: 40%)  $^1\text{H}$  NMR (400 MHz,  $\text{DMSO-}d_6$ )  $\delta$  8.16 (t,  $J = 9.2$  Hz, 2H), 8.05 (t,  $J = 5.7$  Hz, 2H), 7.26 – 7.16 (m, 10H), 7.01 (t,  $J = 8.0$  Hz, 1H), 6.88 (d,  $J = 11.3$  Hz, 1H), 6.82 (d,  $J = 7.7$  Hz, 1H), 4.64 (t,  $J = 5.5$  Hz, 2H), 4.55 – 4.50 (m, 2H), 3.52 – 3.45 (m, 8H), 3.41 (t,  $J = 5.3$  Hz, 4H), 3.28 – 3.16 (m, 4H), 3.01 – 2.91 (m, 2H), 2.76 (dd,  $J = 13.6, 9.4$  Hz, 2H), 2.66 (t,  $J = 7.9$  Hz, 4H), 2.34 (q,  $J = 7.6$  Hz, 4H).  $^{13}\text{C}$  NMR (101 MHz,  $\text{DMSO-}d_6$ )  $\delta$  171.4, 171.2, 171.1, 160.3 (d,  $J_{\text{C-F}} = 242.8$  Hz), 141.7 (d,  $J_{\text{C-F}} = 7.6$  Hz), 138.00, 137.97, 130.2 (d,  $J_{\text{C-F}} = 5.3$  Hz), 129.3, 128.1, 127.5, 126.3, 125.1 (d,  $J_{\text{C-F}} = 15.9$  Hz), 124.1 (d,  $J_{\text{C-F}} = 3.0$  Hz), 114.7 (d,  $J_{\text{C-F}} = 21.9$  Hz), 114.0, 72.2, 69.0, 60.3, 56.2, 54.04, 54.00, 38.7, 38.0, 36.5, 35.3, 30.4, 24.0, 18.6. HRMS (m/z, ESI-TOF): Calcd for  $\text{C}_{38}\text{H}_{49}\text{FN}_4\text{O}_8\text{Na}^+$  [ $\text{M}+\text{Na}^+$ ] 731.3427, found 731.3426.

## Synthesis of 10c:

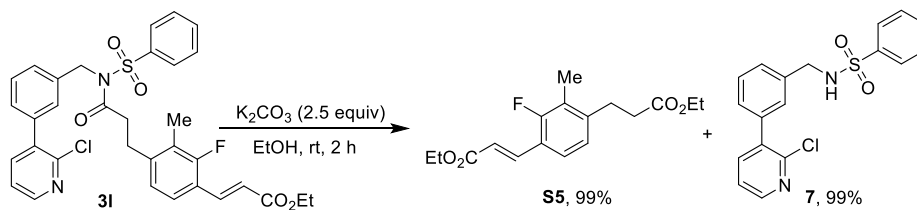

To **3I** (0.7 mmol, 1.0 equiv) and  $\text{K}_2\text{CO}_3$  (1.75 mmol, 2.5 equiv) in EtOH (7 mL) at room temperature stirred for 2 h. Then volatile matter was removed under reduced pressure. Then the crude reaction mixture was extracted with EtOAc and water, the combined organic phase was dried over anhydrous  $\text{Na}_2\text{SO}_4$  and concentrated under reduced pressure. The resulting residue was purified by flash silica gel chromatography using petroleum ether/EtOAc (10:1-2:1) as the eluent to give **7** (yield: 99%) and **S5** (yield: 99%).  $^1\text{H}$  NMR (400 MHz, Chloroform-*d*)  $\delta$  7.79 (d,  $J = 16.1$  Hz, 1H), 7.30 (t,  $J = 7.7$  Hz, 1H), 6.96 (d,  $J = 8.0$  Hz, 1H), 6.47 (d,  $J = 16.2$  Hz, 1H), 4.26 (q,  $J = 7.1$  Hz, 2H), 4.13 (q,  $J = 7.1$  Hz, 2H), 2.96 (t,  $J = 7.8$  Hz, 2H), 2.57 (t,  $J = 7.8$  Hz, 2H), 2.24 (d,  $J = 2.4$  Hz, 3H), 1.33 (t,  $J = 7.1$  Hz, 3H), 1.24 (t,  $J = 7.1$  Hz, 4H).  $^{13}\text{C}$  NMR (101 MHz, Chloroform-*d*)  $\delta$  172.6, 167.2, 159.9 (d,  $J_{\text{C-F}} = 251.7$  Hz), 143.6 (d,  $J_{\text{C-F}} = 4.7$  Hz), 137.7 (d,  $J_{\text{C-F}} = 3.7$  Hz), 125.9 (d,  $J_{\text{C-F}} = 3.7$  Hz), 124.4 (d,  $J_{\text{C-F}} = 3.6$  Hz), 124.1 (d,  $J_{\text{C-F}} = 16.7$  Hz), 120.4 (d,  $J_{\text{C-F}} = 13.6$  Hz), 120.0 (d,  $J_{\text{C-F}} = 6.4$  Hz), 60.8, 60.7, 34.4, 28.4 (d,  $J_{\text{C-F}} = 2.6$  Hz), 14.4, 14.3, 10.6 (d,  $J_{\text{C-F}} = 7.0$  Hz). HRMS ( $m/z$ , ESI-TOF): Calcd for  $\text{C}_{17}\text{H}_{21}\text{FO}_4\text{Na}^+$  [ $\text{M}+\text{Na}^+$ ] 331.1316, found 331.1317.

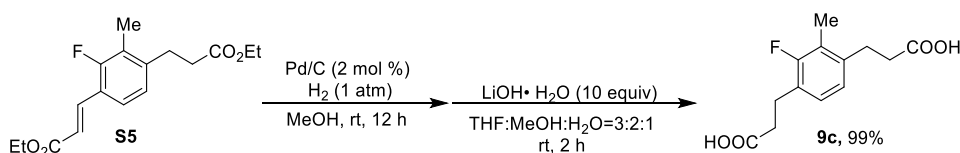

To a solution of ethyl **S5** (0.6 mmol, 1.0 equiv), Pd/C (0.012 mmol, 2 mol %), MeOH (10 mL) under  $\text{H}_2$  atmosphere at room temperature stirred for 12 h. Then the crude reaction mixture was extracted with EtOAc and water, The combined organic phase was dried over anhydrous  $\text{Na}_2\text{SO}_4$  and concentrated under reduced pressure. The residue without further purification.

To a solution of the residue above and  $\text{LiOH}\cdot\text{H}_2\text{O}$  (6.0 mmol, 10 equiv) in THF : MeOH :  $\text{H}_2\text{O}$  (6:4:2 mL) at room temperature stirred for 2 h. Then volatile matter was removed under reduced pressure. Then the crude reaction mixture was extracted with EtOAc and water, The combined water phase was added 1N HCl until  $\text{pH} \approx 1$ , then filtered to give **9c**. (yield: 99%)  $^1\text{H}$  NMR (400 MHz, DMSO-*d*<sub>6</sub>)  $\delta$  12.18 (br, 2H), 7.03

(t,  $J = 7.9$  Hz, 1H), 6.92 (d,  $J = 7.8$  Hz, 1H), 2.79 (td,  $J = 7.7, 4.5$  Hz, 4H), 2.49 – 2.44 (m, 4H), 2.16 (d,  $J = 2.1$  Hz, 3H).  $^{13}\text{C}$  NMR (101 MHz, DMSO- $d_6$ )  $\delta$  173.7, 173.6, 158.9 (d,  $J_{\text{C-F}} = 241.1$  Hz), 139.5 (d,  $J_{\text{C-F}} = 4.0$  Hz), 127.1 (d,  $J_{\text{C-F}} = 5.8$  Hz), 124.7 (d,  $J_{\text{C-F}} = 17.6$  Hz), 123.9 (d,  $J_{\text{C-F}} = 3.4$  Hz), 122.3 (d,  $J_{\text{C-F}} = 16.5$  Hz), 34.0, 33.8, 27.4 (d,  $J_{\text{C-F}} = 2.6$  Hz), 23.8 (d,  $J_{\text{C-F}} = 3.2$  Hz), 10.2 (d,  $J_{\text{C-F}} = 6.3$  Hz). HRMS ( $m/z$ , ESI-TOF): Calcd for  $\text{C}_{13}\text{H}_{14}\text{FO}_4^-$  [ $\text{M-H}$ ] 253.0882, found 253.0883.

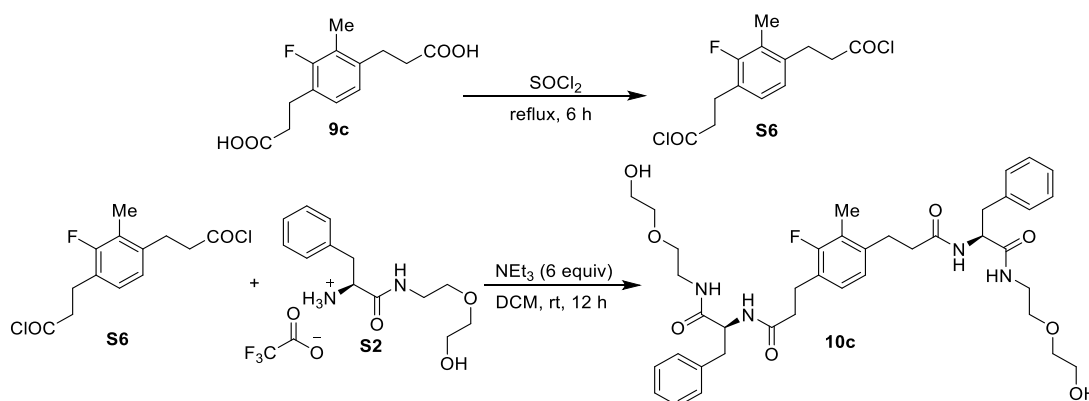

A suspension of **9c** (50.8 mg, 0.20 mmol) in freshly distilled thionyl chloride (3 mL) was gently refluxed to complete solution of the solid (6 h). After evaporation under vacuum the residue was pumped to dryness and without further purification.

To a solution of **S2**<sup>2</sup> (0.6 mmol, 3.0 equiv), triethylamine (1.2 mmol, 6.0 equiv), DCM (10 mL) under  $\text{N}_2$  atmosphere at room temperature stirred for 0.5 h. Then **S6** was added and stirred for another 12 h. Then the crude reaction mixture was extracted with EtOAc and water, the combined organic phase was dried over anhydrous  $\text{Na}_2\text{SO}_4$  and concentrated under reduced pressure. The resulting residue was purified by preparative thin layer chromatography using EtOAc/MeOH (20:1-5:1) as the eluent to give the **10c**. (yield: 40%)  $^1\text{H}$  NMR (400 MHz, DMSO- $d_6$ )  $\delta$  8.25 (t,  $J = 8.9$  Hz, 2H), 8.11 (q,  $J = 6.0$  Hz, 2H), 7.30 – 7.12 (m, 10H), 6.84 (t,  $J = 7.9$  Hz, 1H), 6.74 (d,  $J = 7.8$  Hz, 1H), 4.71 (br, 2H), 4.52 – 4.45 (m, 2H), 3.42 – 3.34 (m, 12H), 3.25 – 3.16 (m, 4H), 2.95 (dd,  $J = 13.7, 5.0$  Hz, 2H), 2.76 (dd,  $J = 13.6, 9.6$  Hz, 2H), 2.62 (q,  $J = 7.7$  Hz, 4H), 2.36 – 2.23 (m, 4H), 2.09 (d,  $J = 2.1$  Hz, 3H).  $^{13}\text{C}$  NMR (101 MHz, DMSO- $d_6$ )  $\delta$  171.4, 171.2, 171.1, 158.8 (d,  $J_{\text{C-F}} = 240.7$  Hz), 139.7 (d,  $J_{\text{C-F}} = 4.0$  Hz), 138.0, 129.3, 129.2, 128.0, 127.0 (d,  $J_{\text{C-F}} = 5.6$  Hz), 126.3, 125.0, 124.8, 123.8 (d,  $J_{\text{C-F}} = 3.1$  Hz), 122.1 (d,  $J_{\text{C-F}} = 16.6$  Hz), 72.2, 68.8, 60.2, 54.12, 54.10, 38.0, 37.9, 35.7, 35.3, 28.3, 24.3, 10.2 (d,  $J_{\text{C-F}} = 6.4$  Hz). HRMS ( $m/z$ , ESI-TOF): Calcd for  $\text{C}_{39}\text{H}_{51}\text{FN}_4\text{O}_8\text{Na}^+$  [ $\text{M}+\text{Na}^+$ ] 745.3583, found 745.3583.



## Hydrolysis of **5a**:

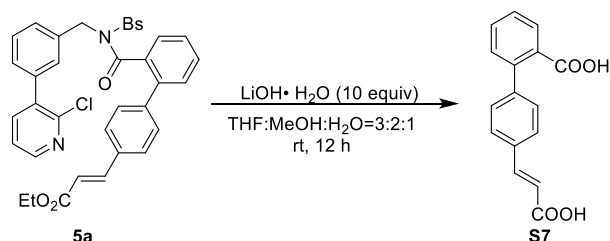

To a solution of **5a** (0.05 mmol) and  $\text{LiOH} \cdot \text{H}_2\text{O}$  (0.5 mmol, 10 equiv) in  $\text{THF}:\text{MeOH}:\text{H}_2\text{O}$  (1.5:1.0:0.5 mL) at room temperature stirred for 12 h. Then volatile matter was removed under reduced pressure. Then the crude reaction mixture was extracted with EtOAc and water, The combined water phase was added 1N HCl until  $\text{pH} \approx 1$ , then filtered to give **S7**.  $^1\text{H}$  NMR (400 MHz,  $\text{DMSO-d}_6$ )  $\delta$  7.75 (d,  $J = 7.6$  Hz, 1H), 7.73 (d,  $J = 8.1$  Hz, 2H), 7.66 – 7.57 (m, 2H), 7.48 (t,  $J = 7.5$  Hz, 1H), 7.41 (d,  $J = 7.6$  Hz, 1H), 7.37 (d,  $J = 8.0$  Hz, 2H), 6.57 (d,  $J = 16.0$  Hz, 1H).  $^{13}\text{C}$  NMR (101 MHz,  $\text{DMSO-d}_6$ )  $\delta$  169.5, 167.7, 143.6, 142.8, 140.4, 133.2, 132.3, 131.1, 130.4, 129.3, 128.9, 128.1, 127.7, 119.2. HRMS ( $m/z$ , ESI-TOF): Calcd for  $\text{C}_{16}\text{H}_{12}\text{O}_4\text{Na}^+$  [ $\text{M}+\text{Na}^+$ ] 291.0628, found 291.0631.

### 3 NMR Spectra of Compounds

$^1\text{H}$  NMR (400 MHz, Chloroform-*d*)

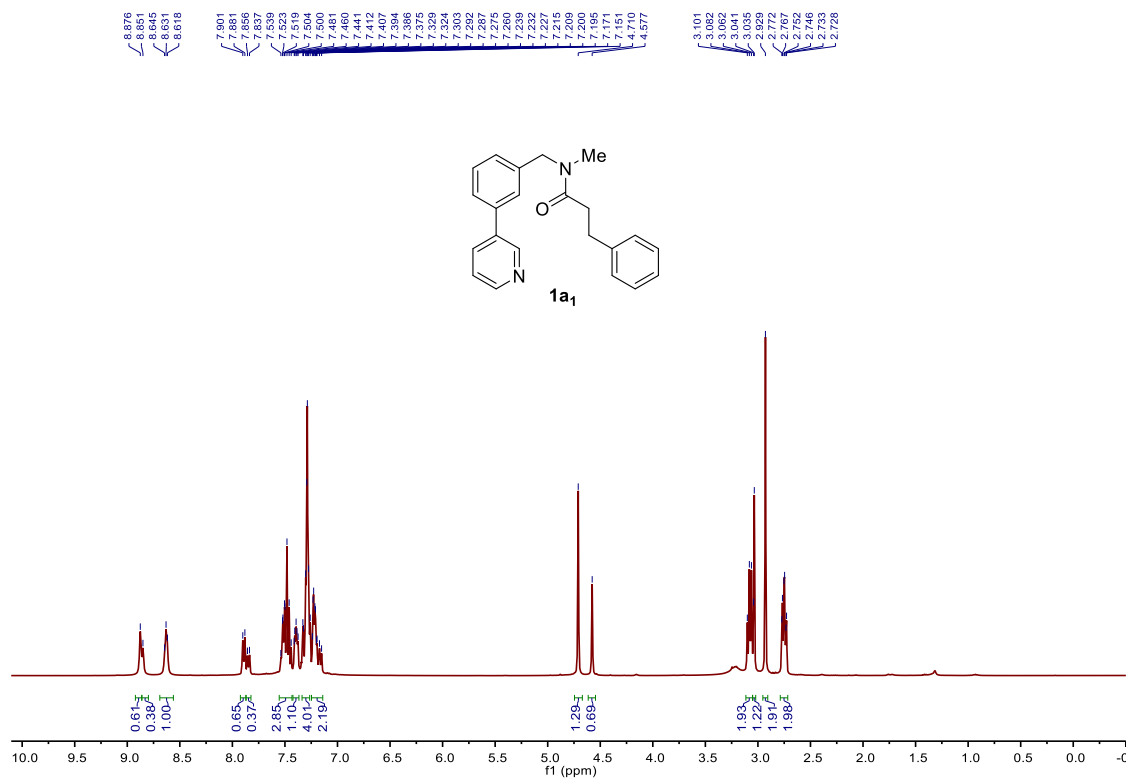

$^{13}\text{C}$  NMR (101 MHz, Chloroform-*d*)

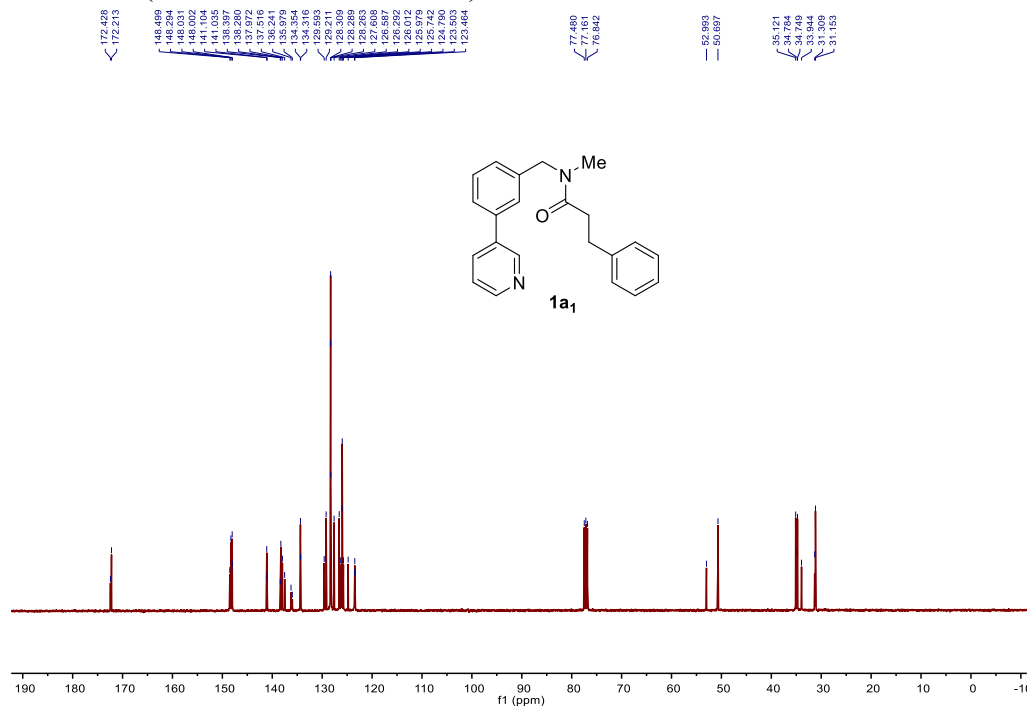

### <sup>1</sup>H NMR (400 MHz, Chloroform-*d*)

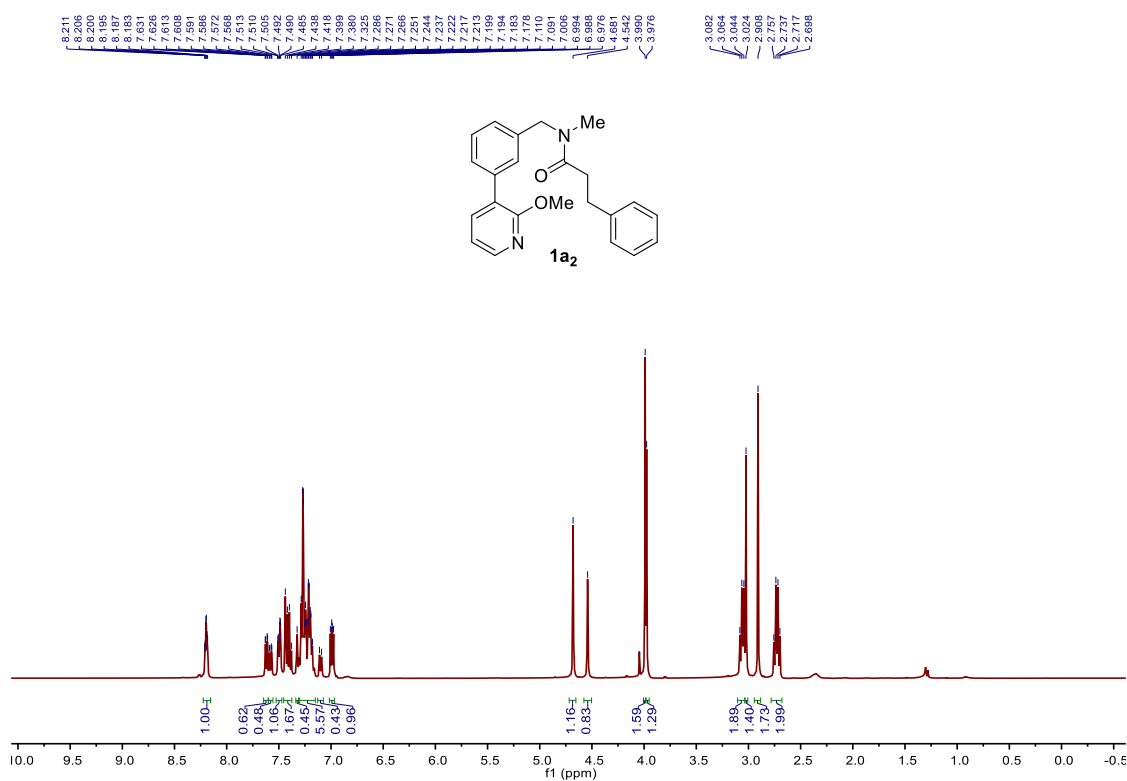

### <sup>13</sup>C NMR (101 MHz, Chloroform-*d*)

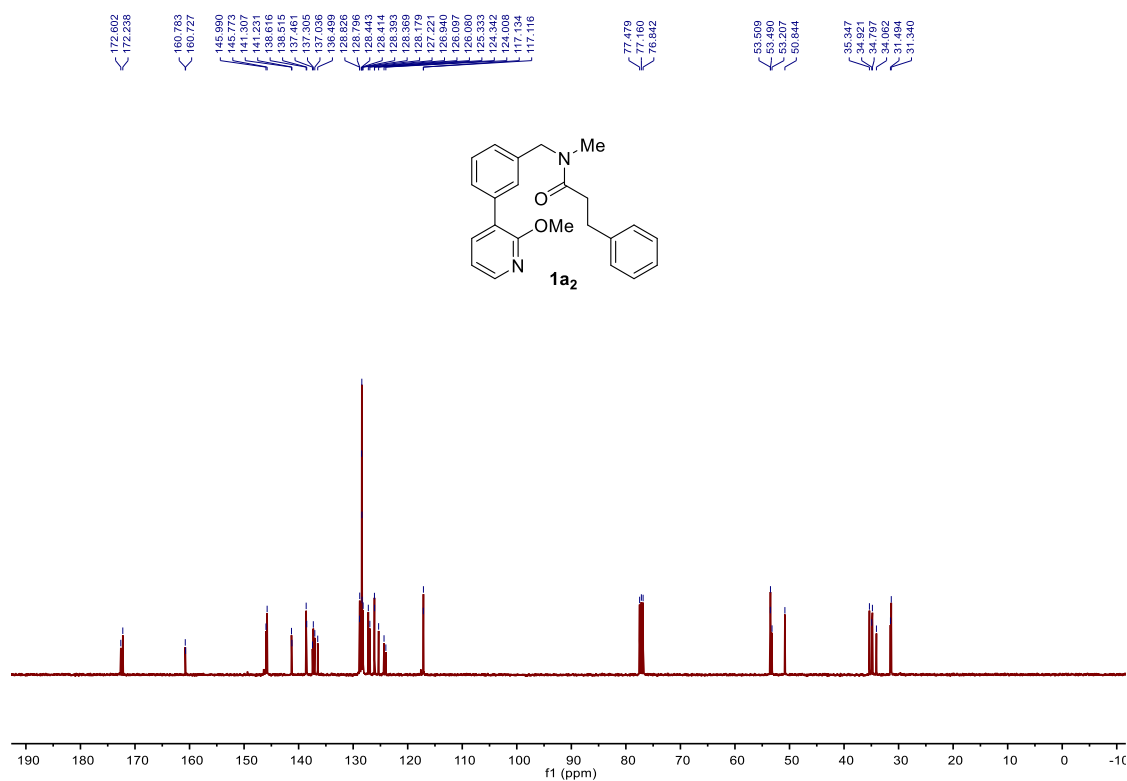

<sup>1</sup>H NMR (400 MHz, Chloroform-*d*)

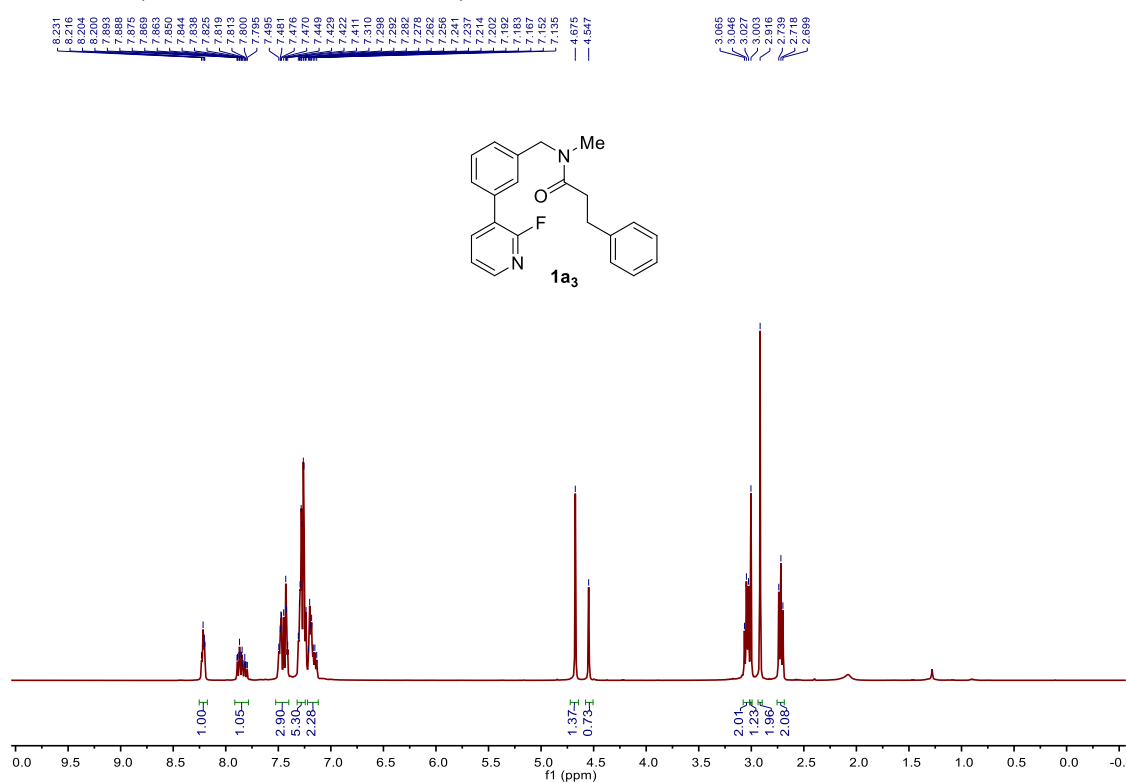

<sup>13</sup>C NMR (101 MHz, Chloroform-*d*)

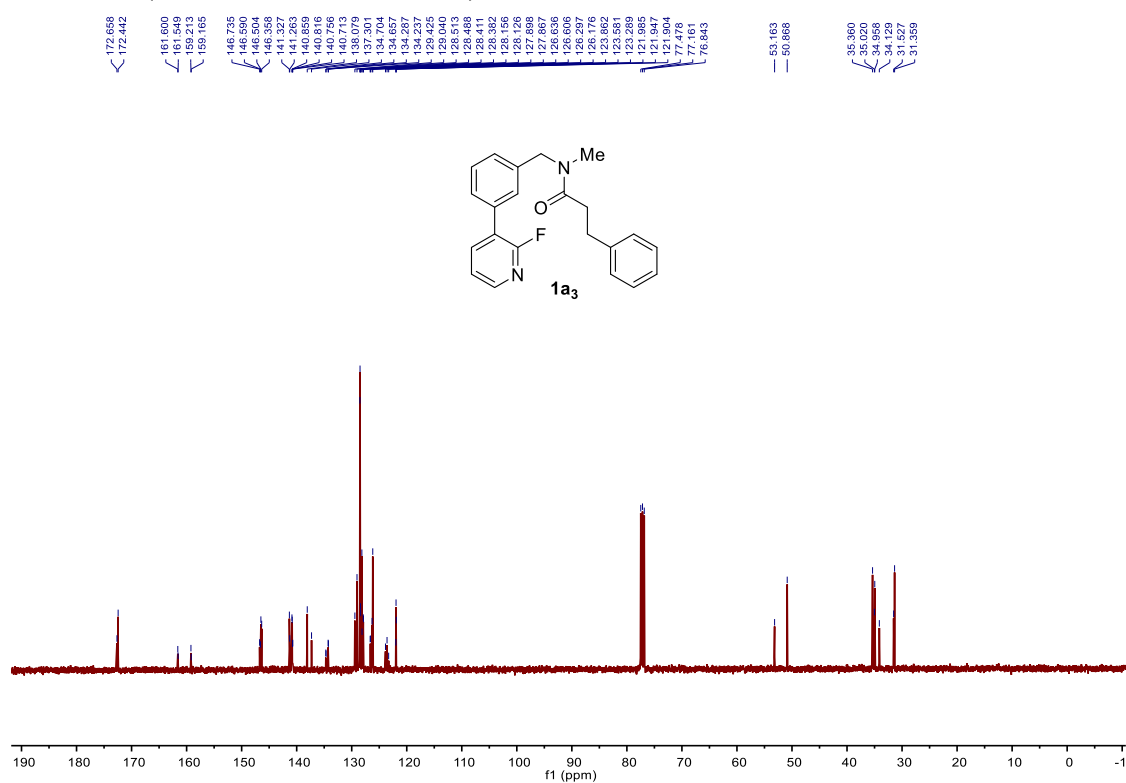

<sup>1</sup>H NMR (400 MHz, Chloroform-*d*)

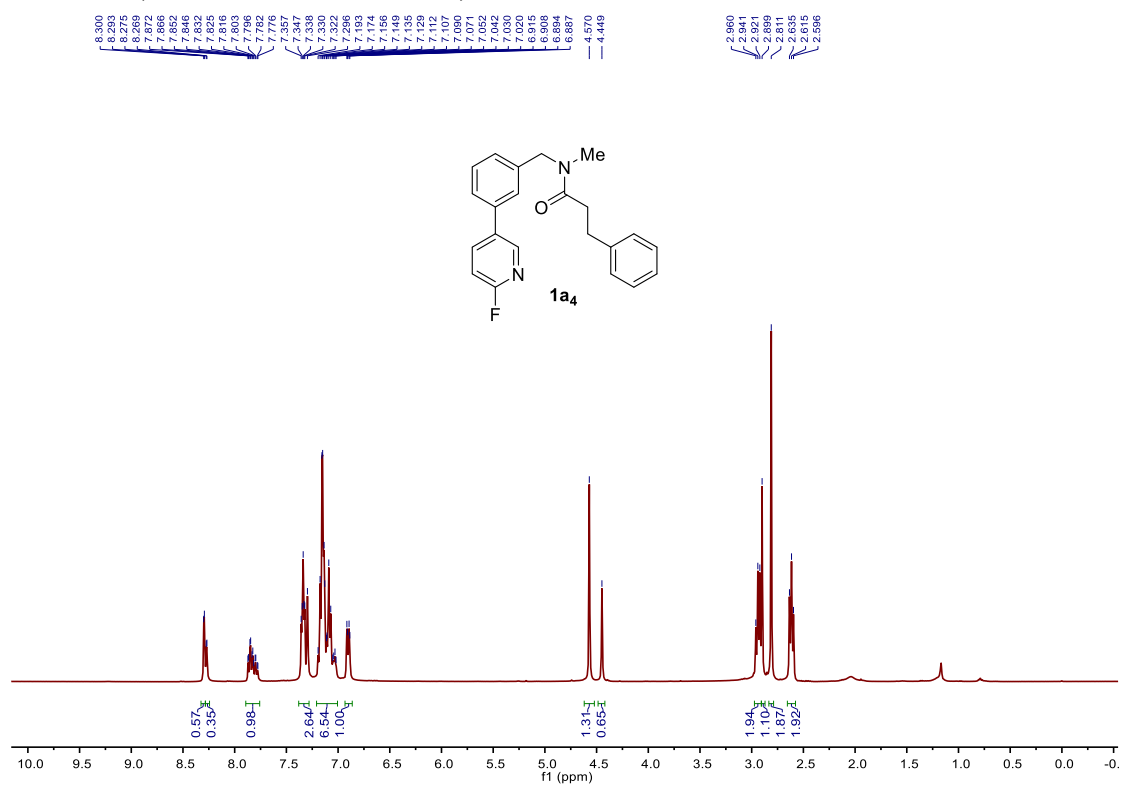

<sup>13</sup>C NMR (101 MHz, Chloroform-*d*)

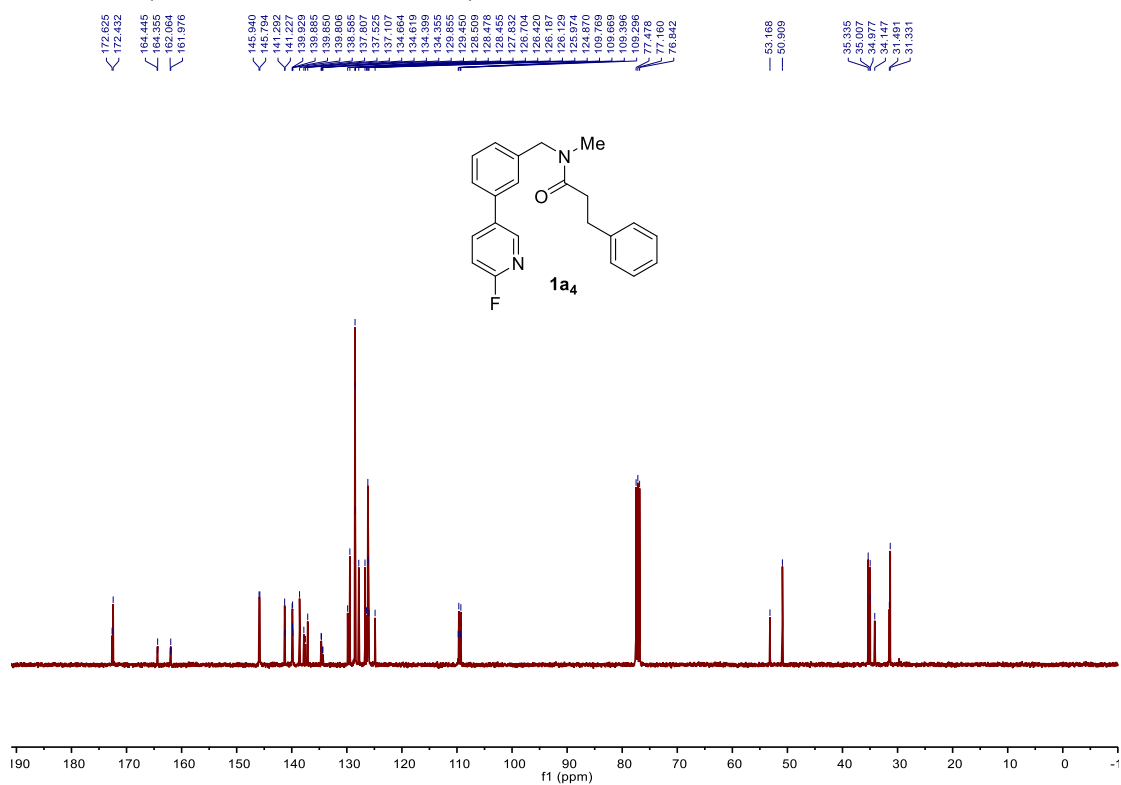

<sup>1</sup>H NMR (400 MHz, Chloroform-*d*)

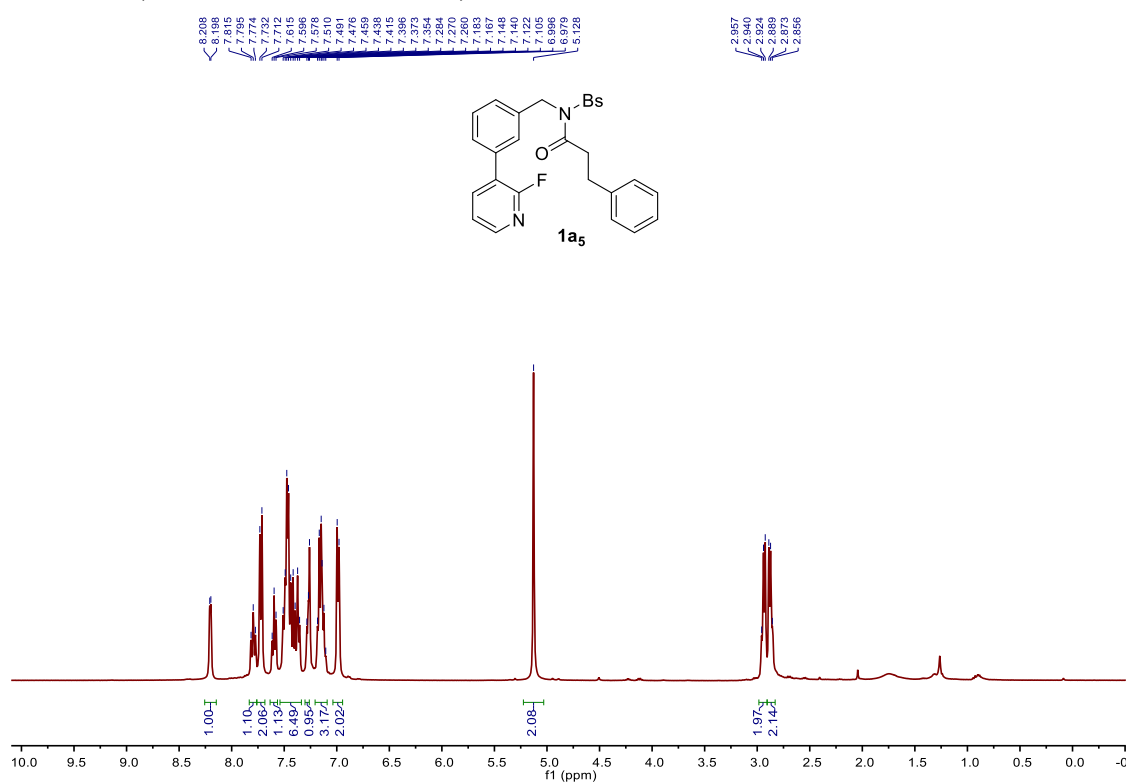

<sup>13</sup>C NMR (101 MHz, Chloroform-*d*)

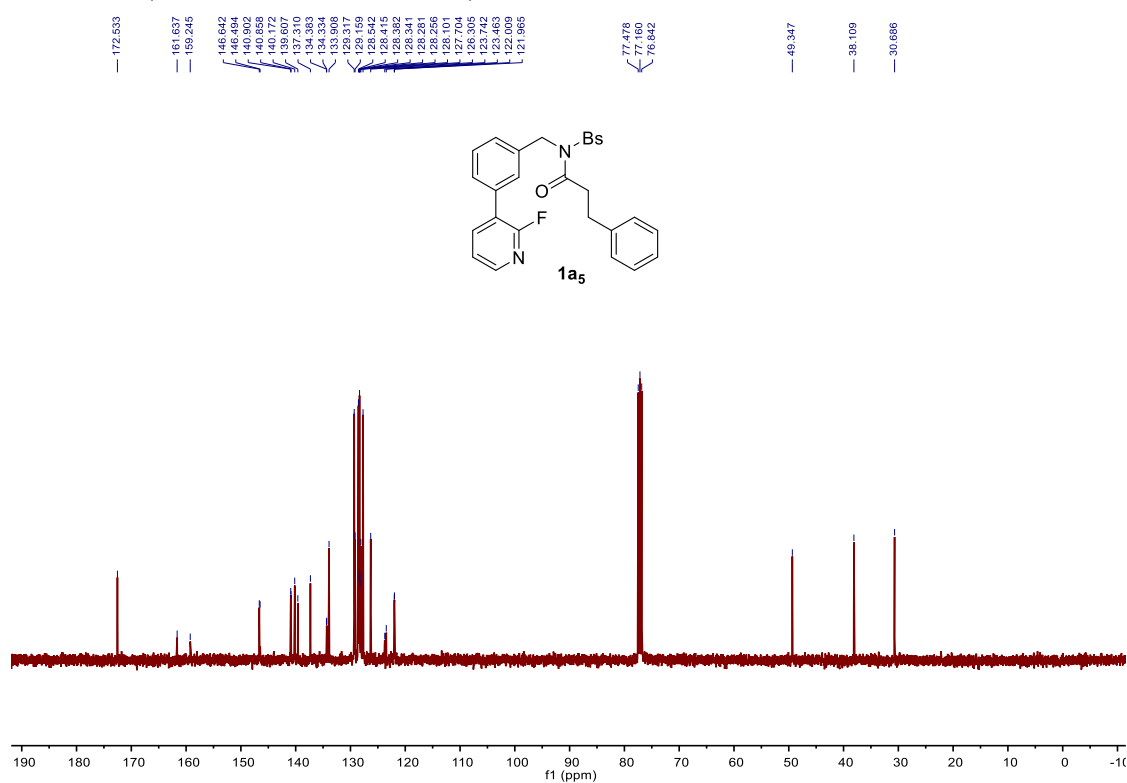

# $^1\text{H}$ NMR (400 MHz, Chloroform-*d*)

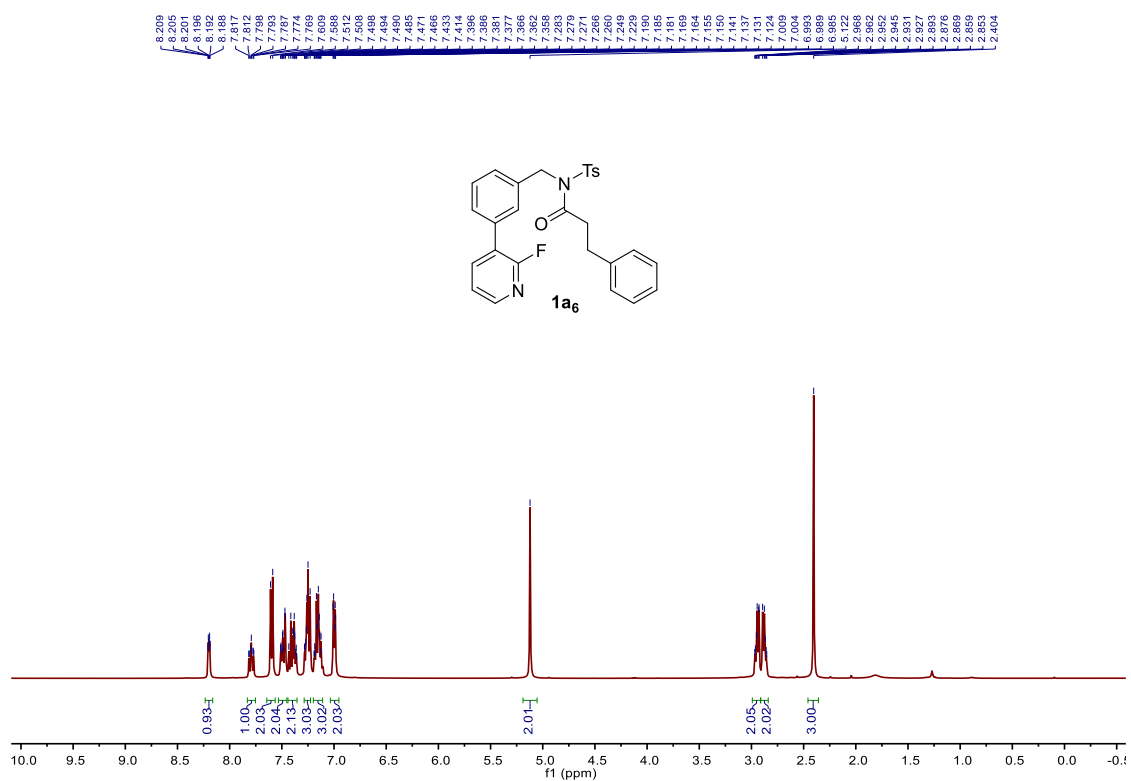

# $^{13}\text{C}$ NMR (101 MHz, Chloroform-*d*)

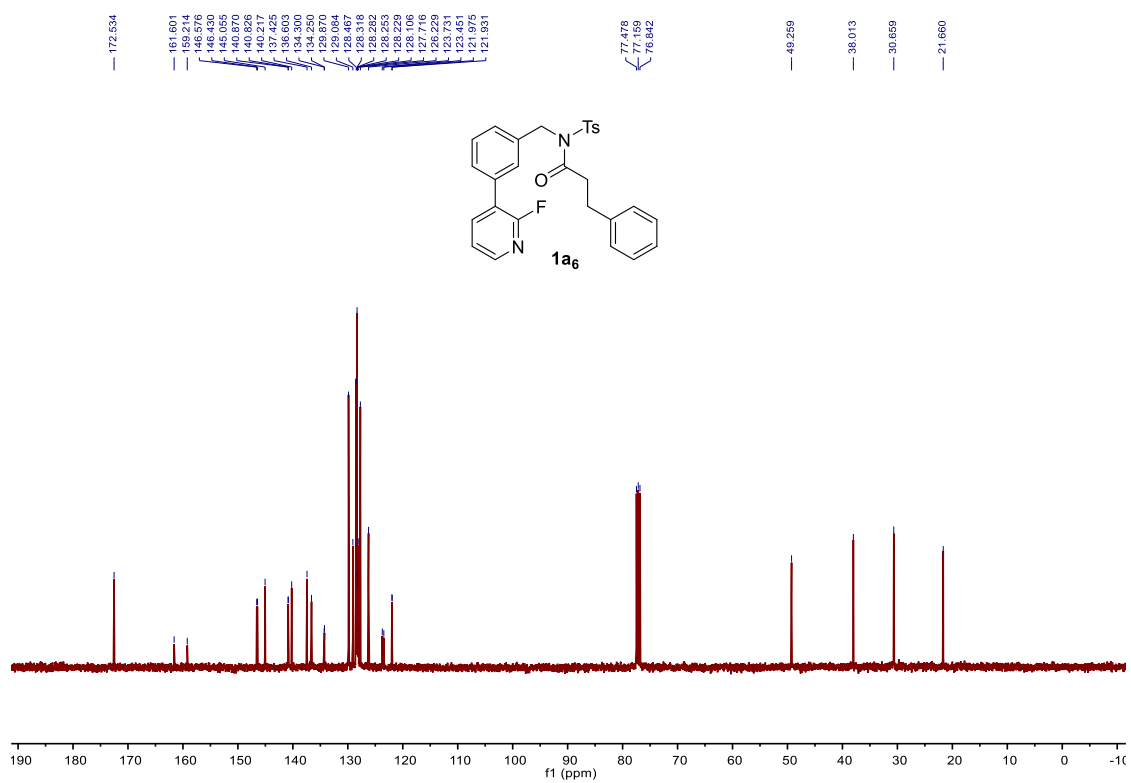

# <sup>1</sup>H NMR (400 MHz, Chloroform-*d*)

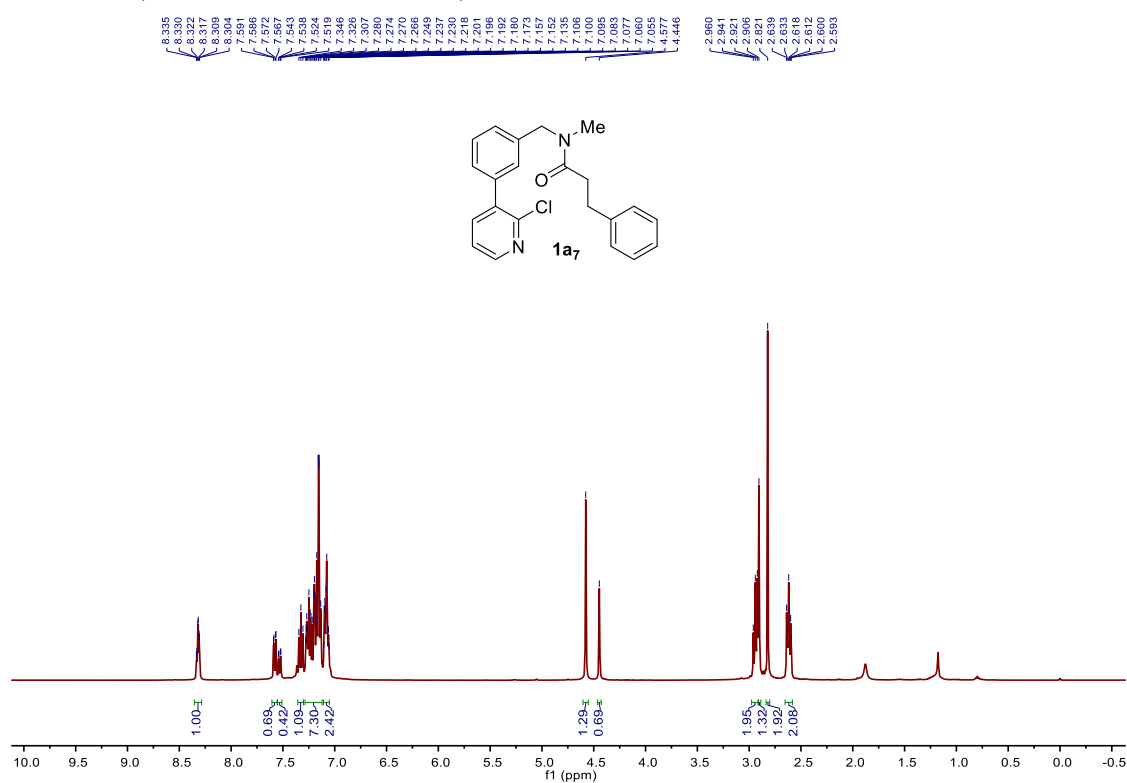

# <sup>13</sup>C NMR (101 MHz, Chloroform-*d*)

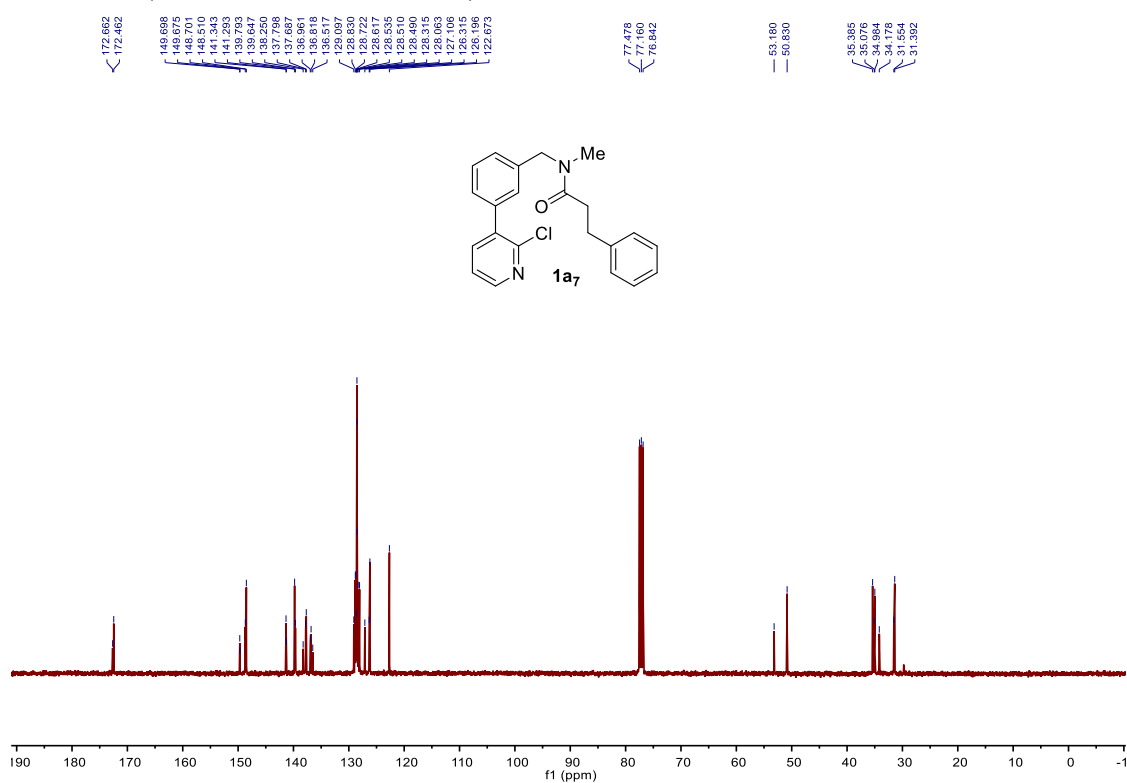



$^1\text{H}$  NMR (400 MHz, Chloroform-*d*)

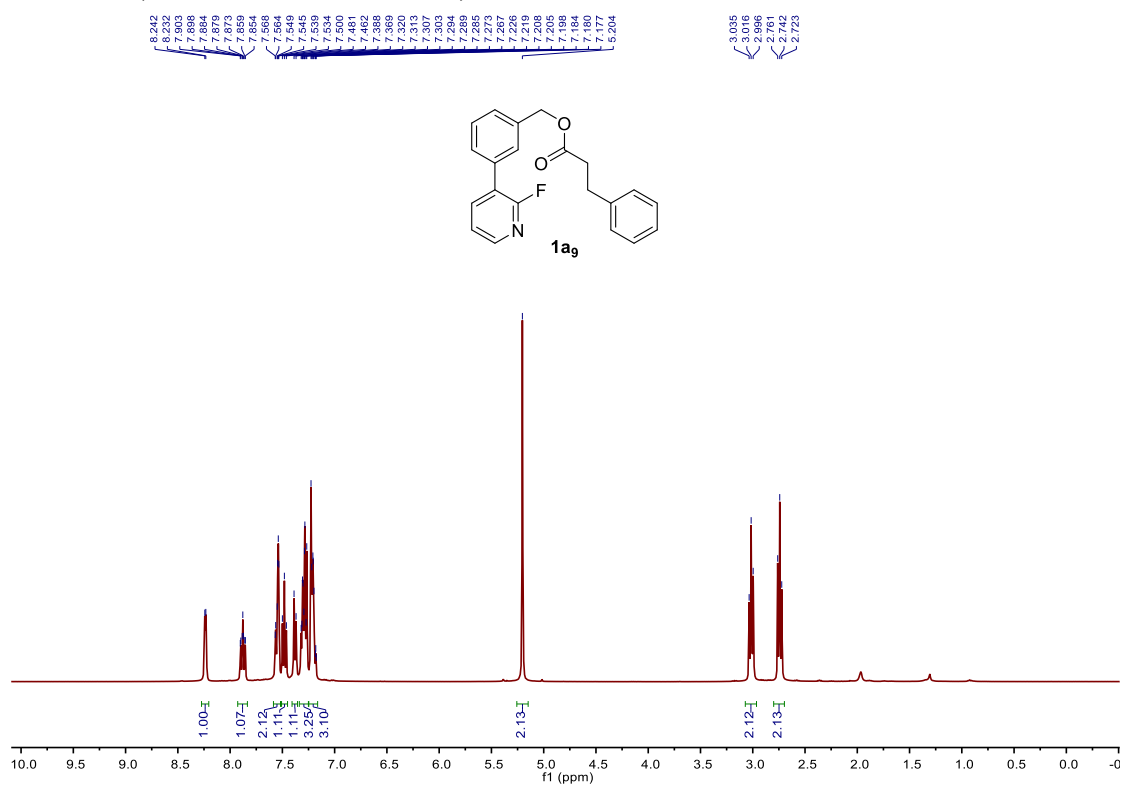

$^{13}\text{C}$  NMR (101 MHz, Chloroform-*d*)

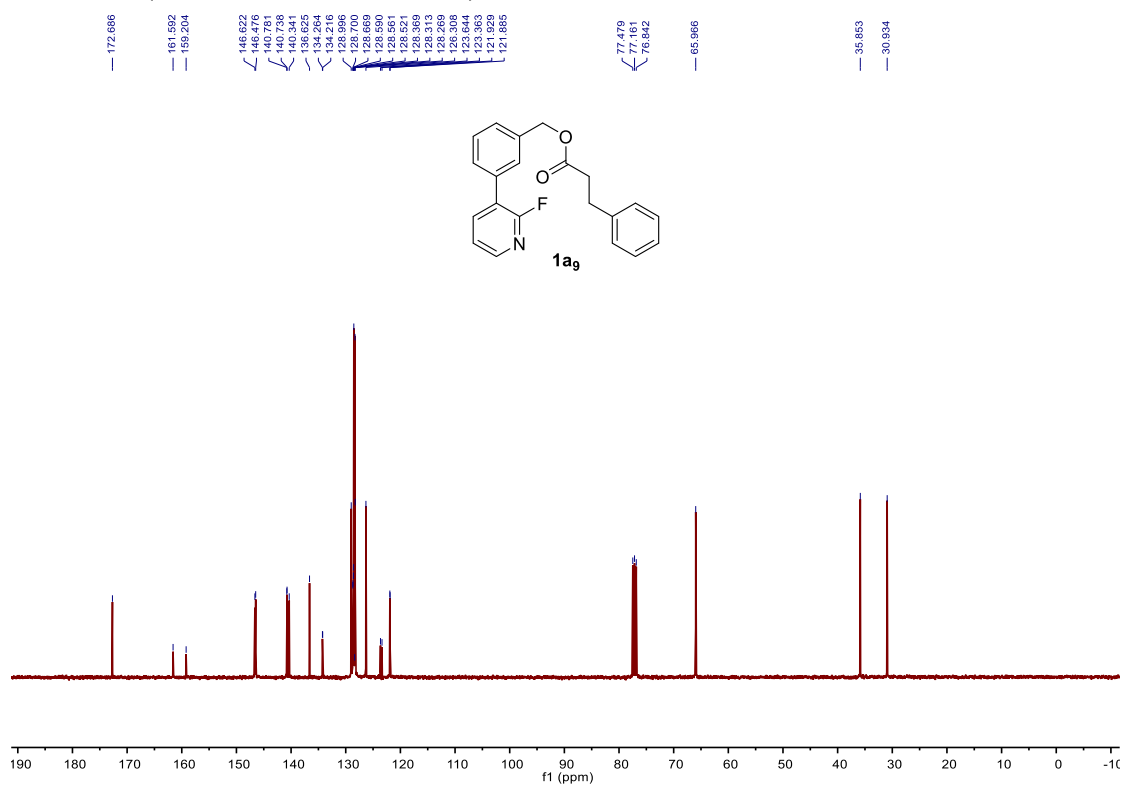

<sup>1</sup>H NMR (400 MHz, Chloroform-*d*)

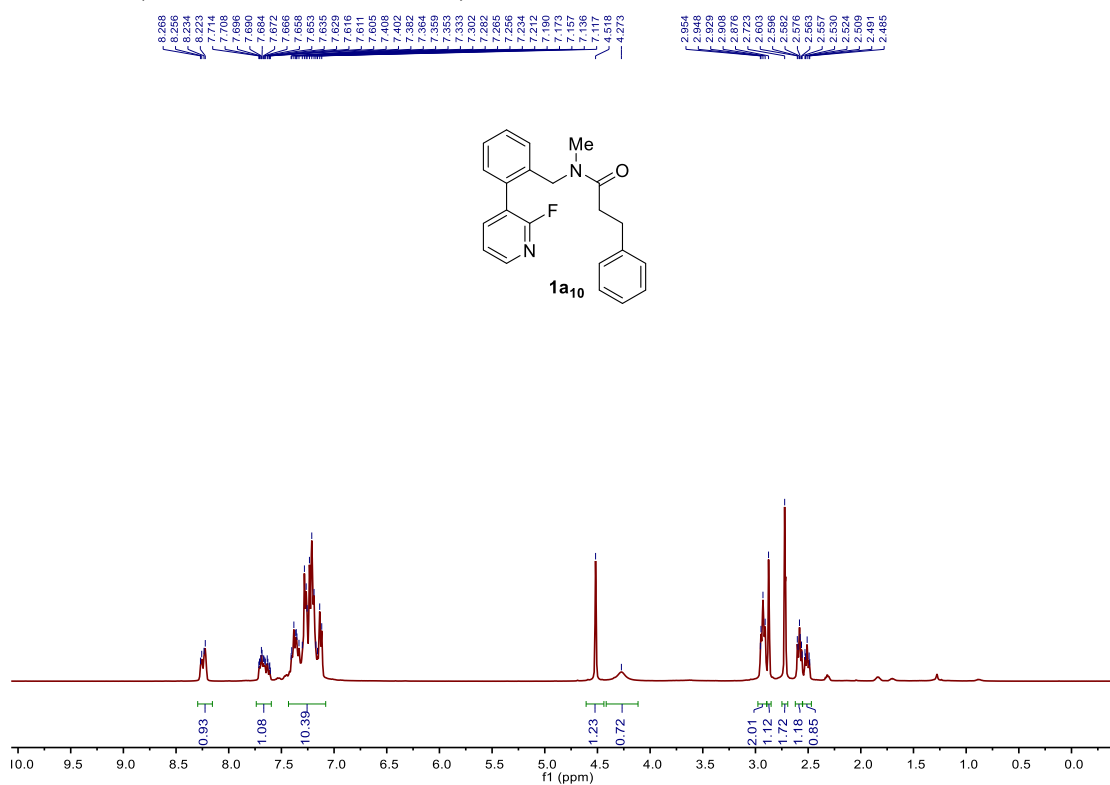

<sup>13</sup>C NMR (101 MHz, Chloroform-*d*)

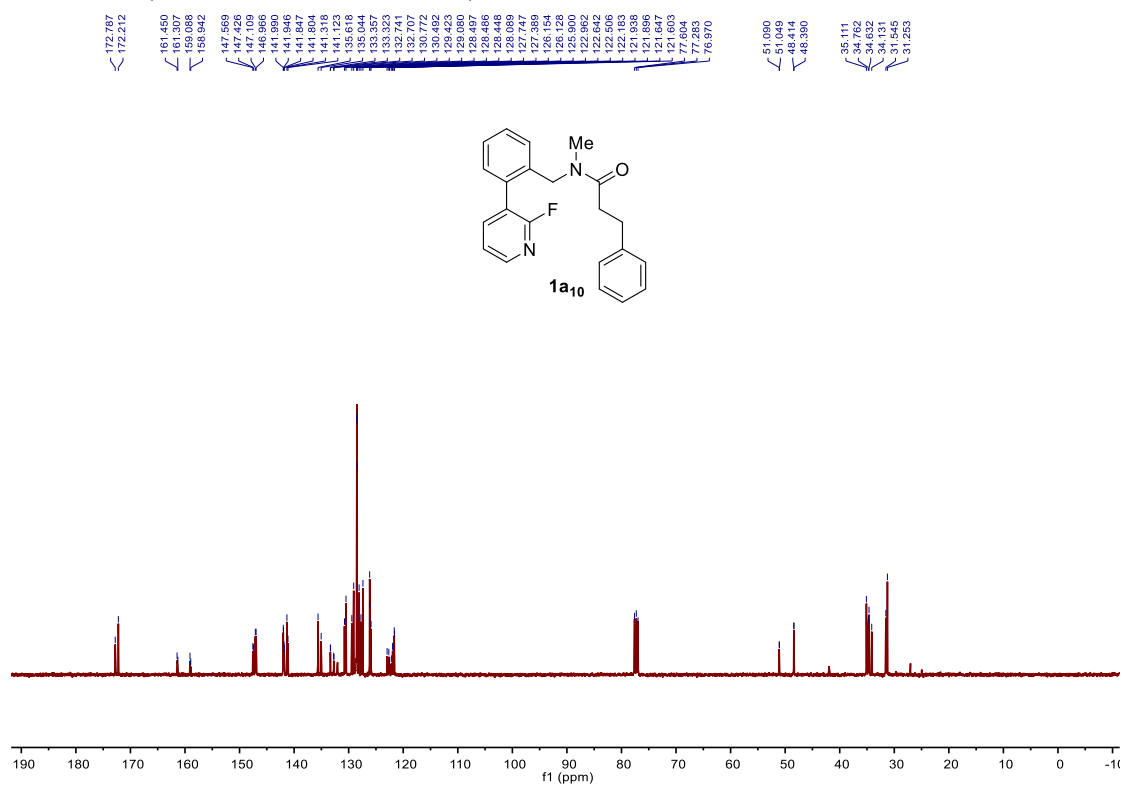

<sup>1</sup>H NMR (400 MHz, Chloroform-*d*)

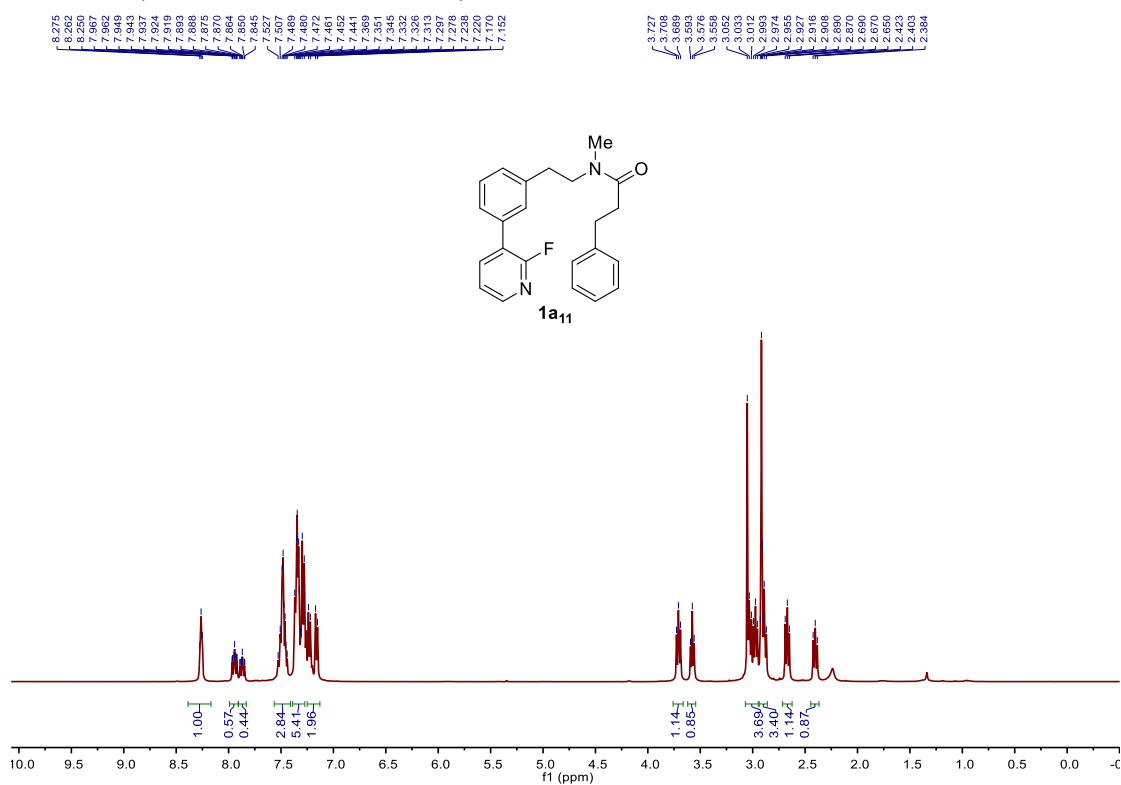

<sup>13</sup>C NMR (101 MHz, Chloroform-*d*)

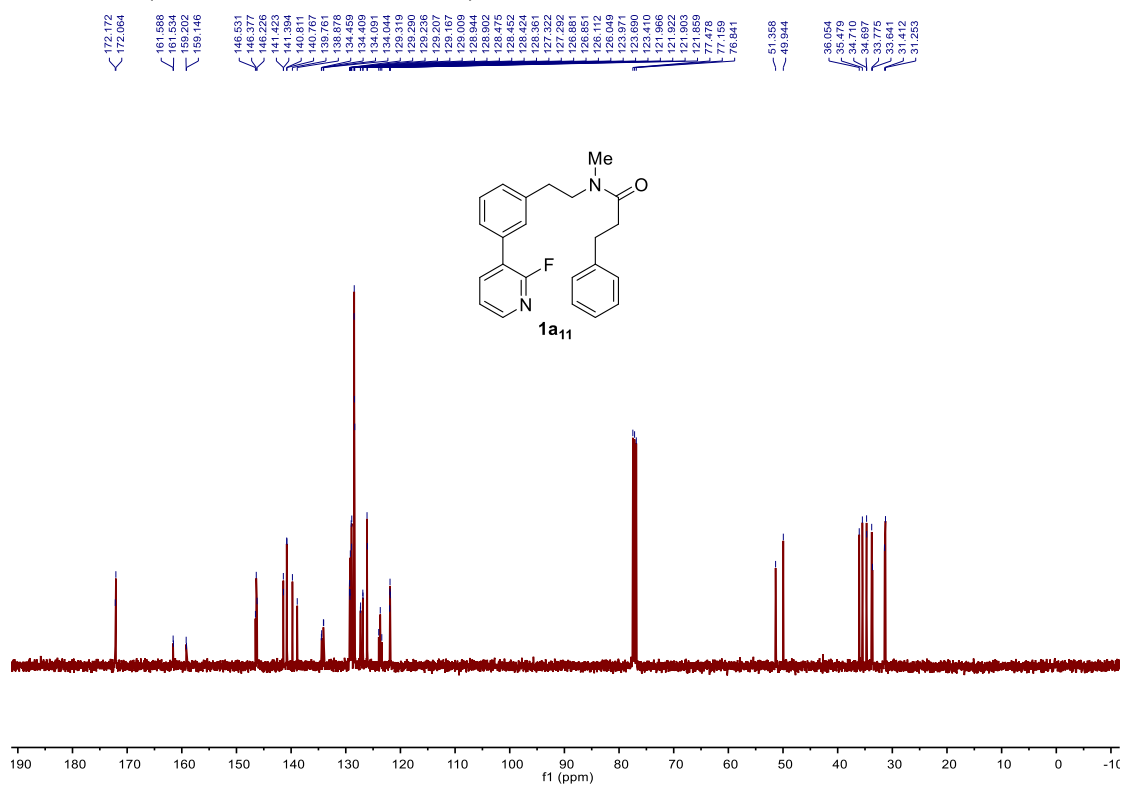

<sup>1</sup>H NMR (400 MHz, Chloroform-*d*)

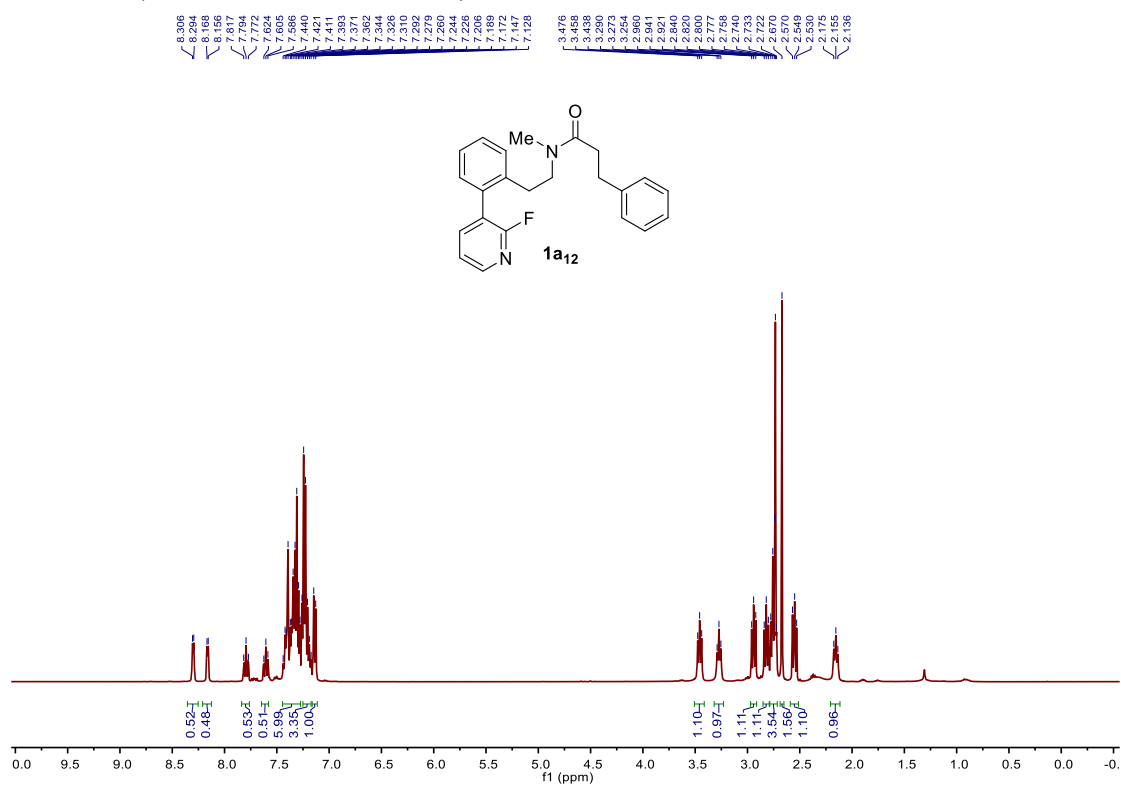

<sup>13</sup>C NMR (101 MHz, Chloroform-*d*)

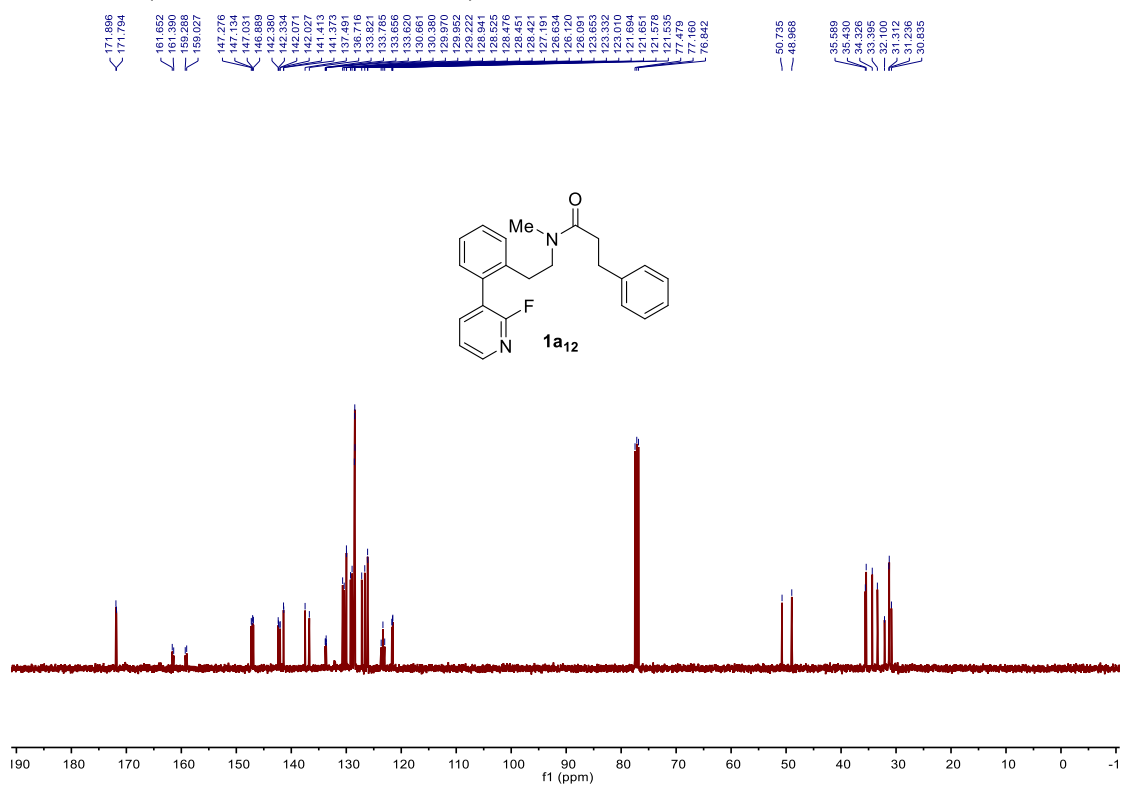

<sup>1</sup>H NMR (400 MHz, Chloroform-*d*)

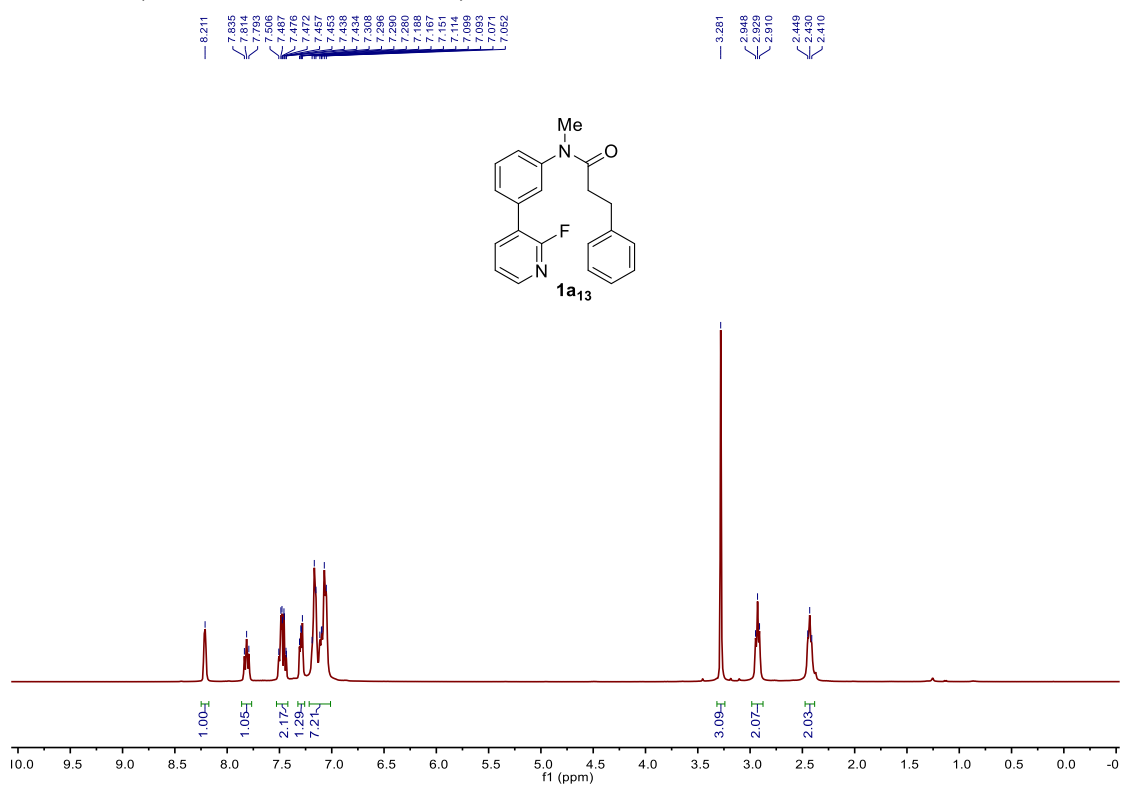

<sup>13</sup>C NMR (101 MHz, Chloroform-*d*)

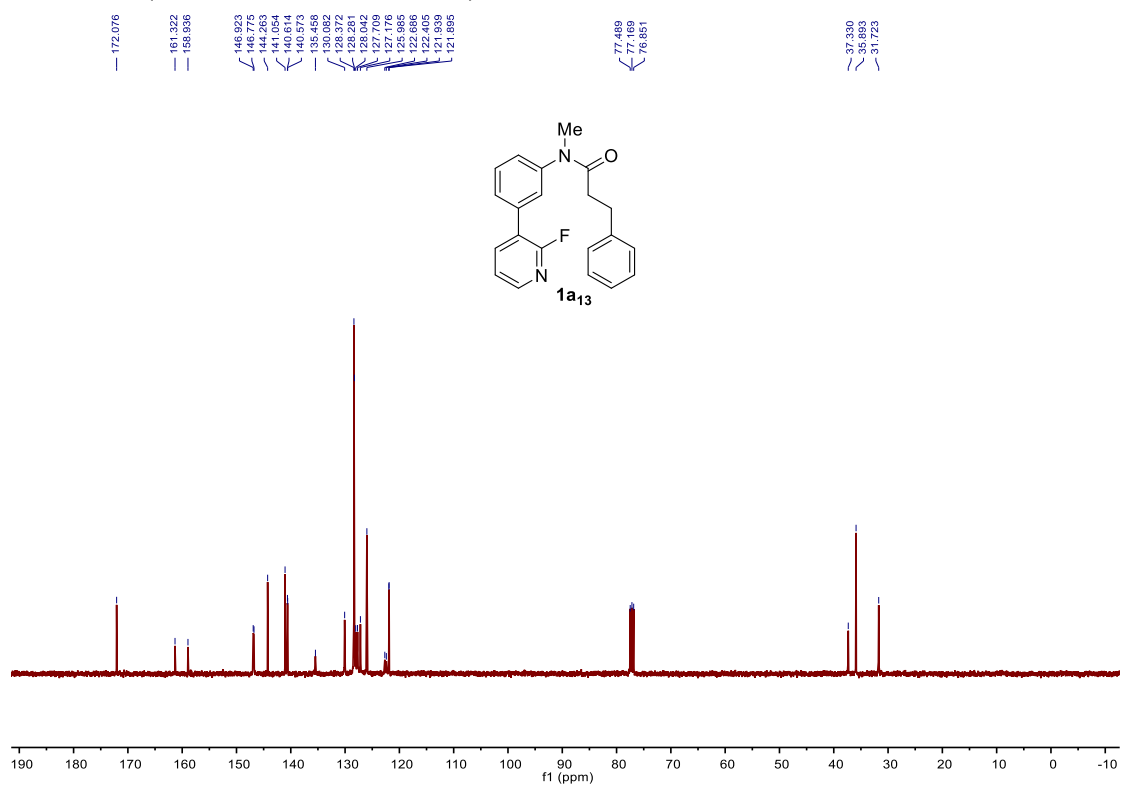

$^1\text{H}$  NMR (400 MHz, Chloroform-*d*)

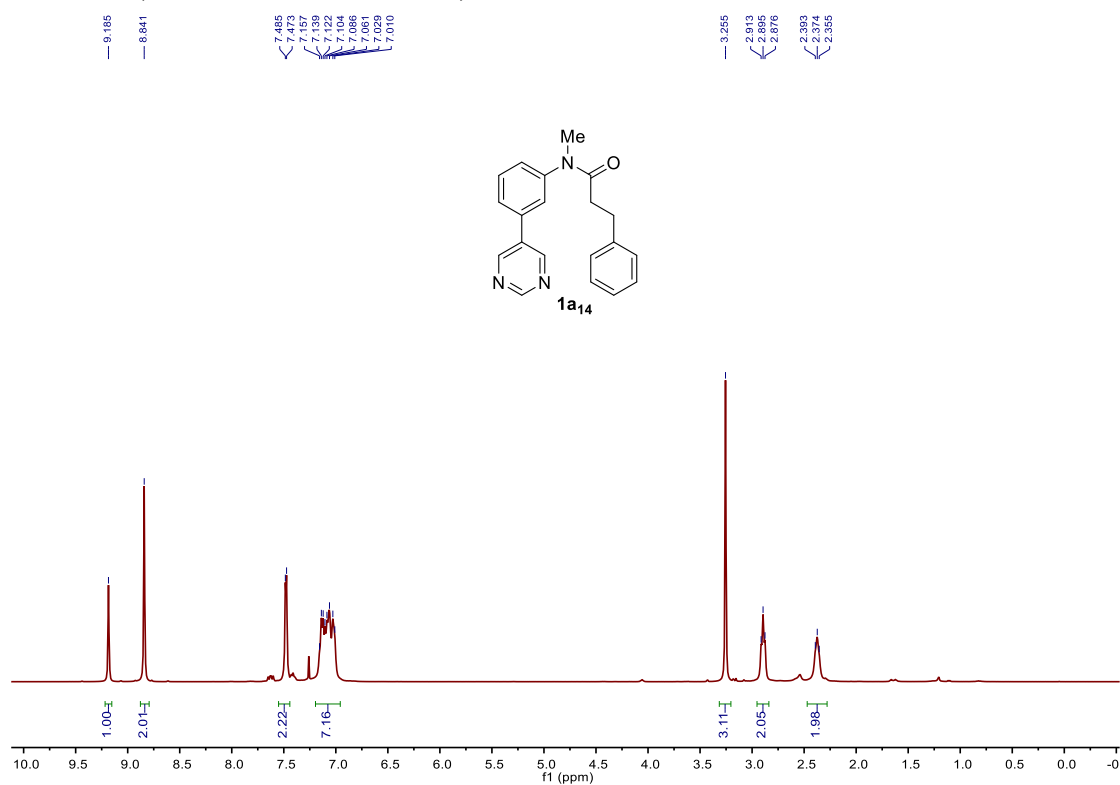

$^{13}\text{C}$  NMR (101 MHz, Chloroform-*d*)

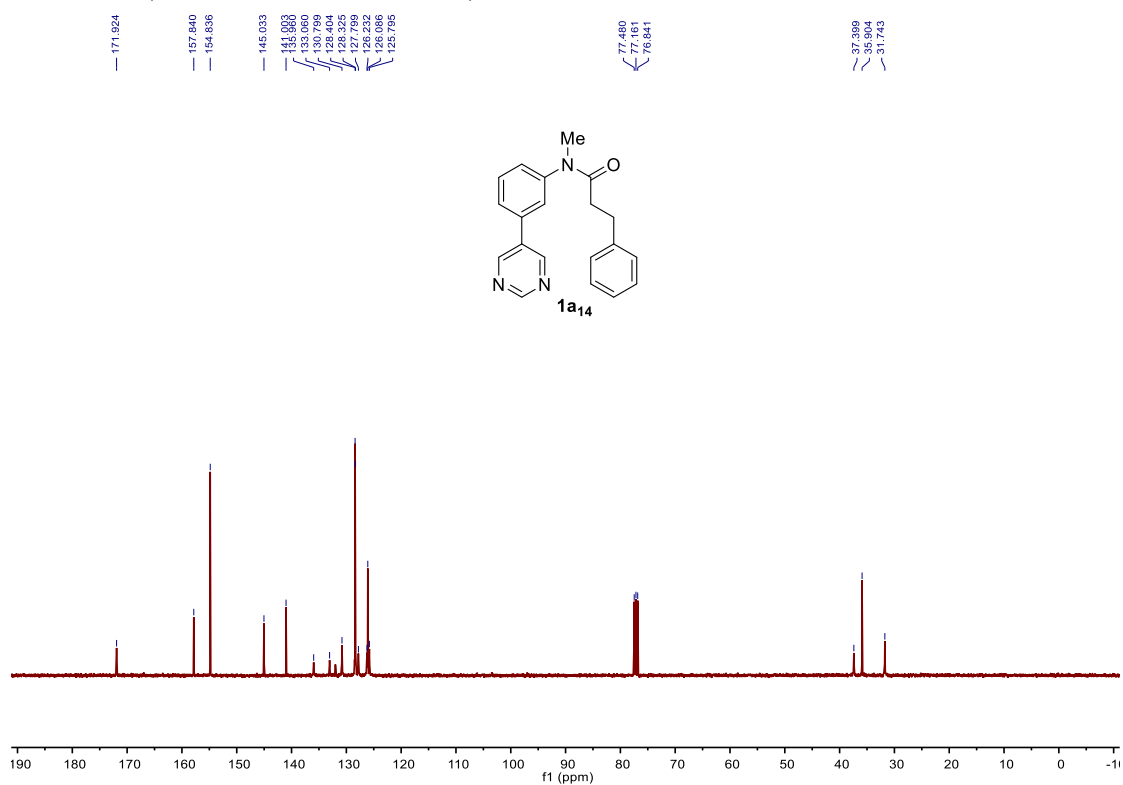

$^1\text{H}$  NMR (400 MHz, Chloroform-*d*)

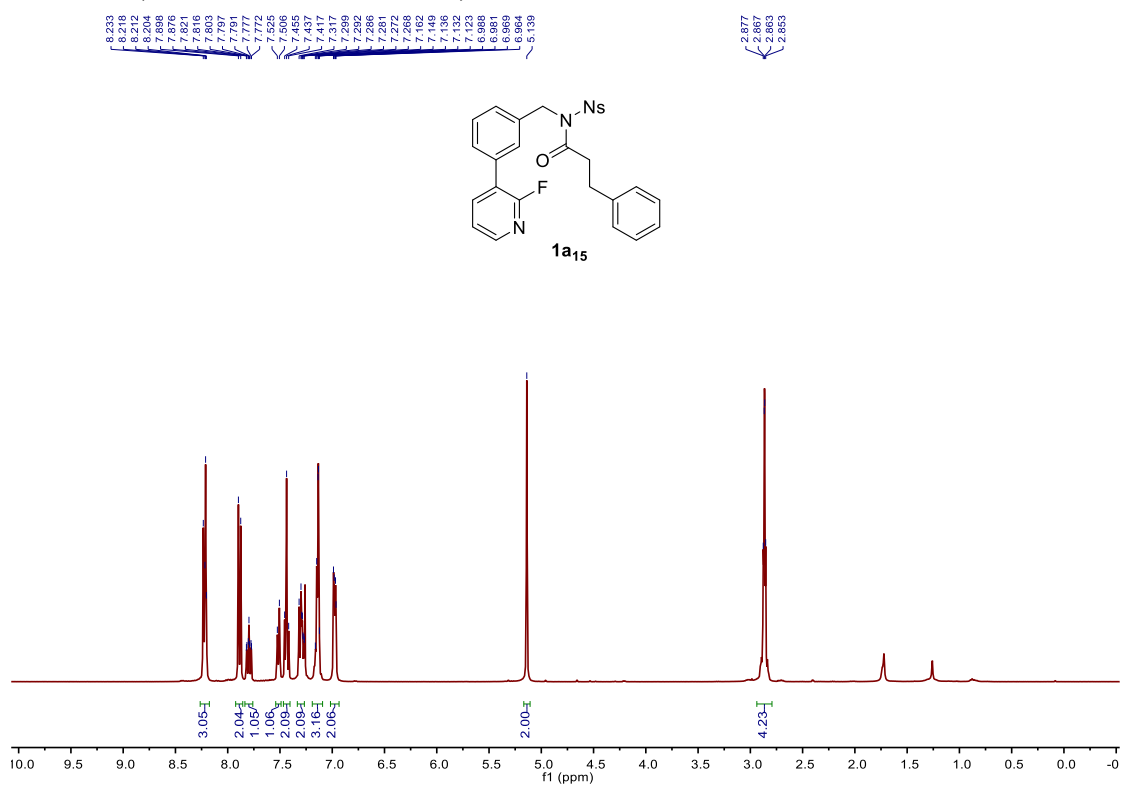

$^{13}\text{C}$  NMR (101 MHz, Chloroform-*d*)

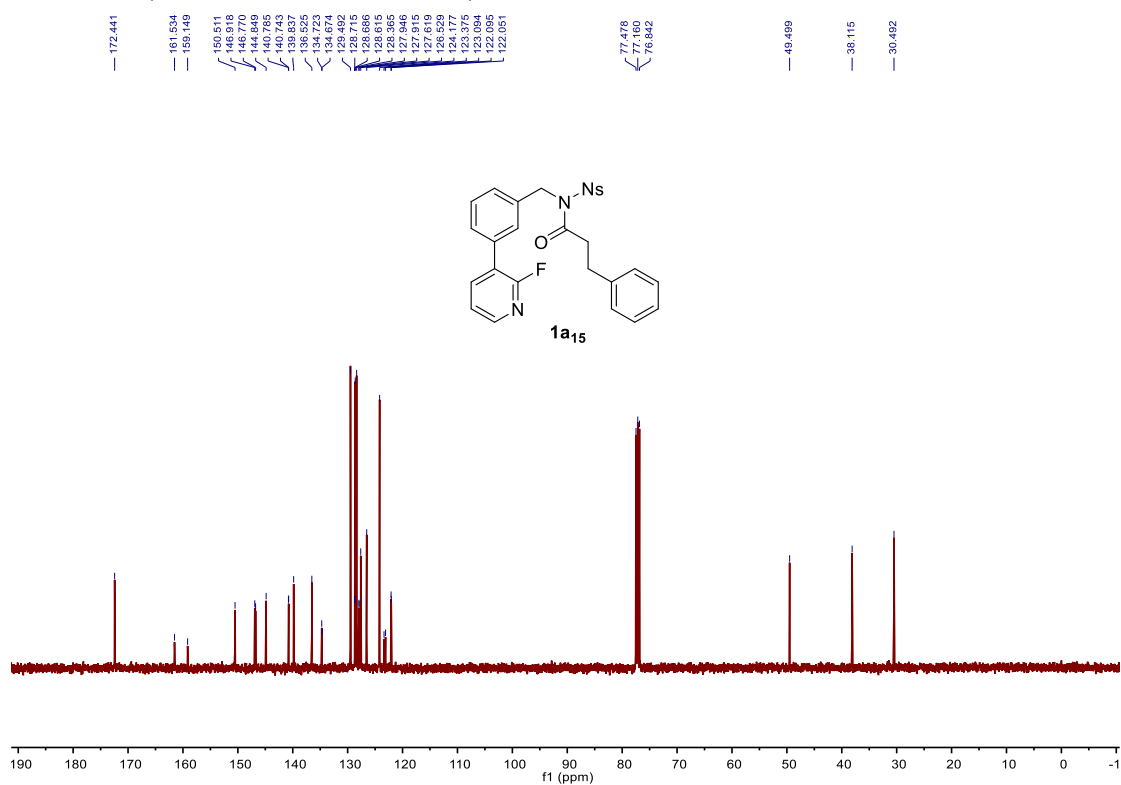

$^1\text{H}$  NMR (400 MHz, Chloroform-*d*)

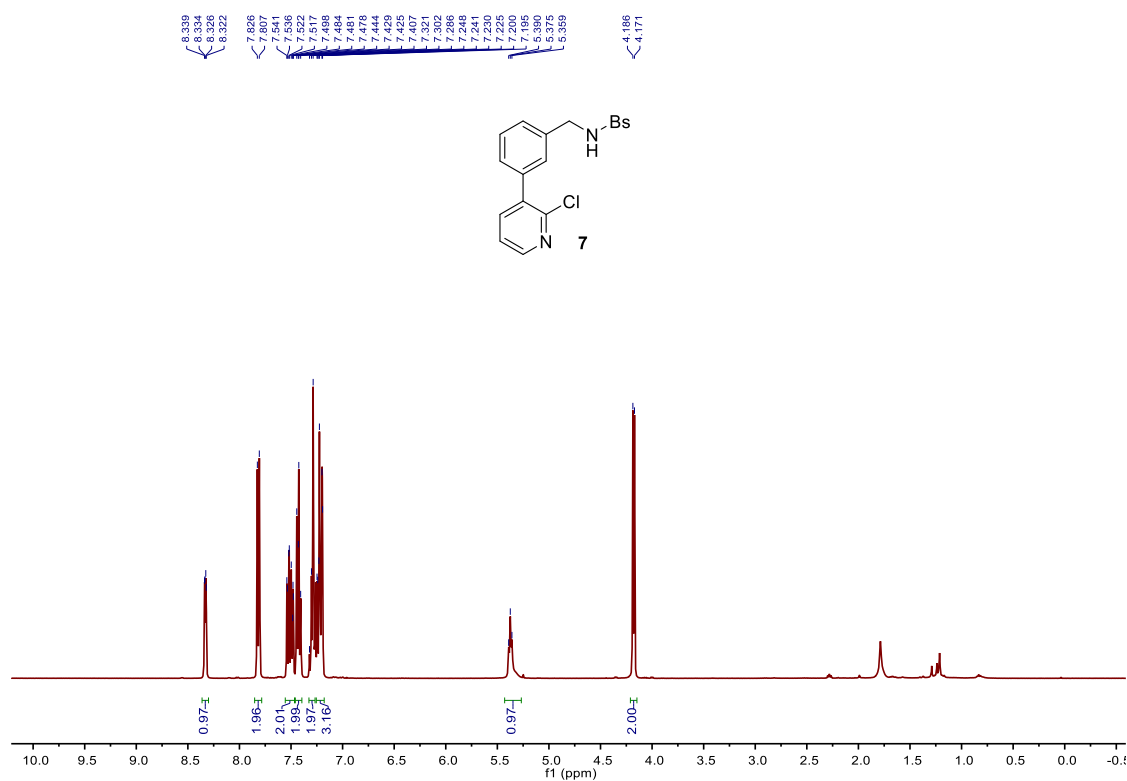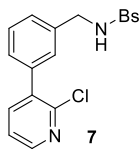

$^{13}\text{C}$  NMR (101 MHz, Chloroform-*d*)

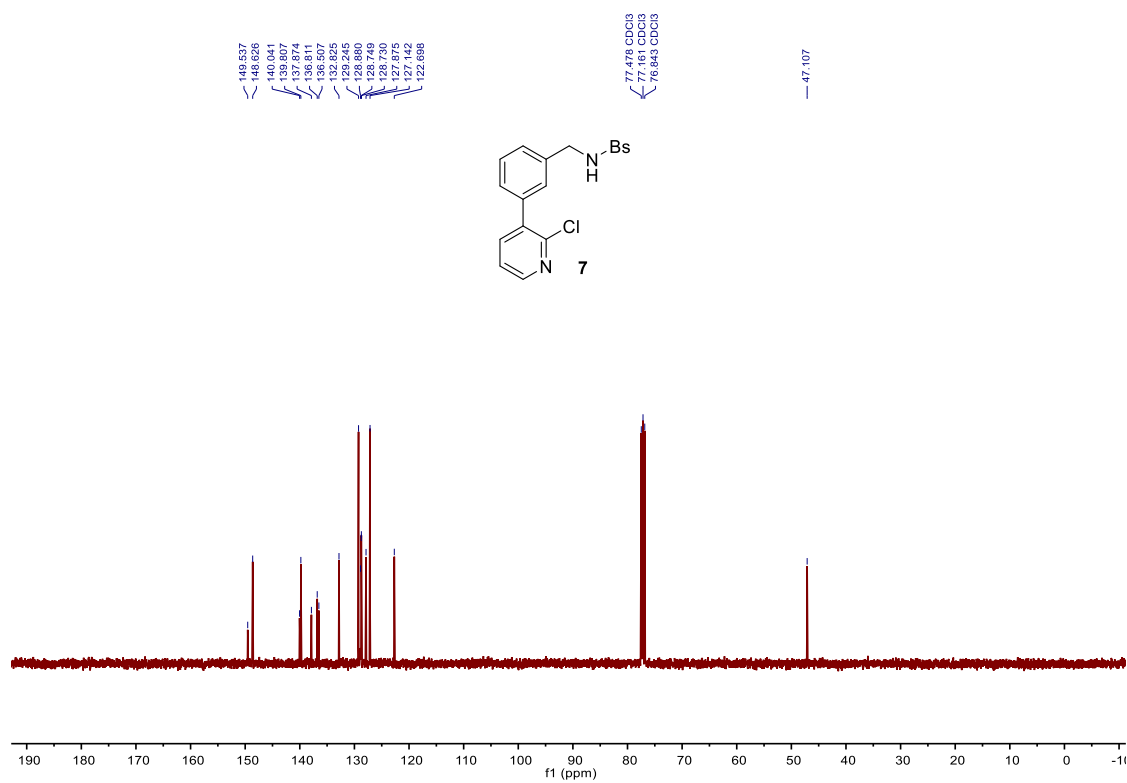



$^1\text{H}$  NMR (400 MHz, Chloroform-*d*)

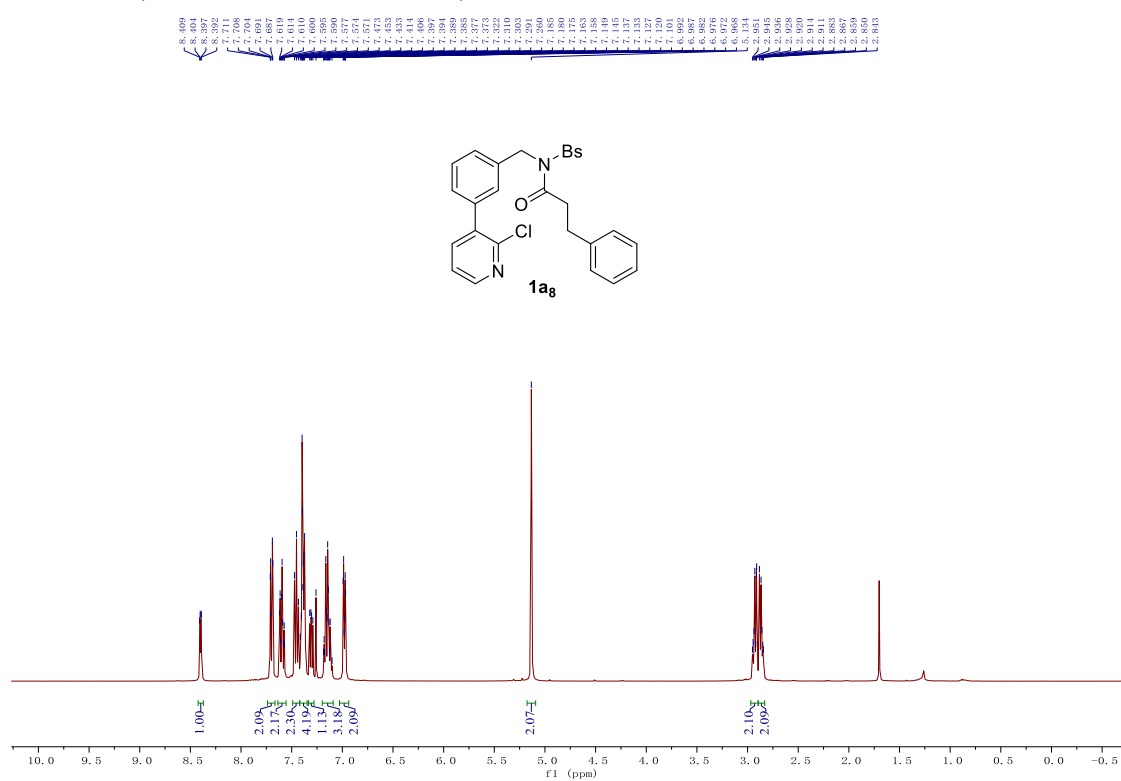

$^{13}\text{C}$  NMR (101 MHz, Chloroform-*d*)

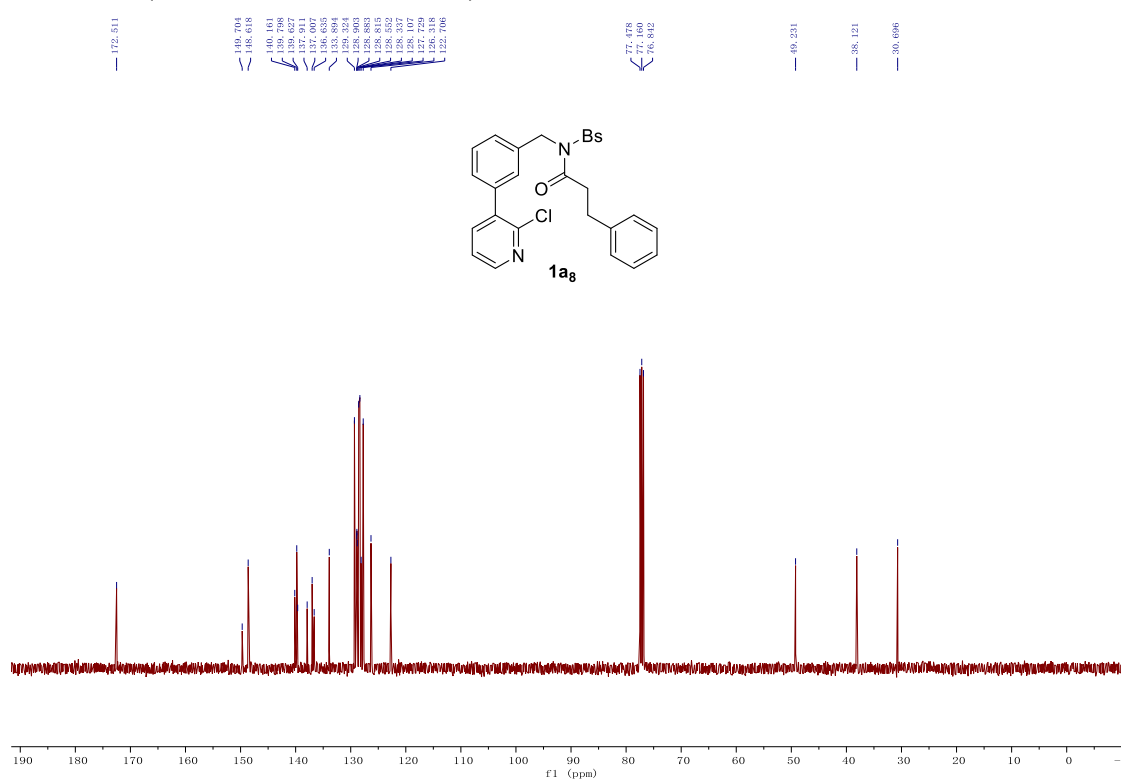

<sup>1</sup>H NMR (400 MHz, Chloroform-*d*)

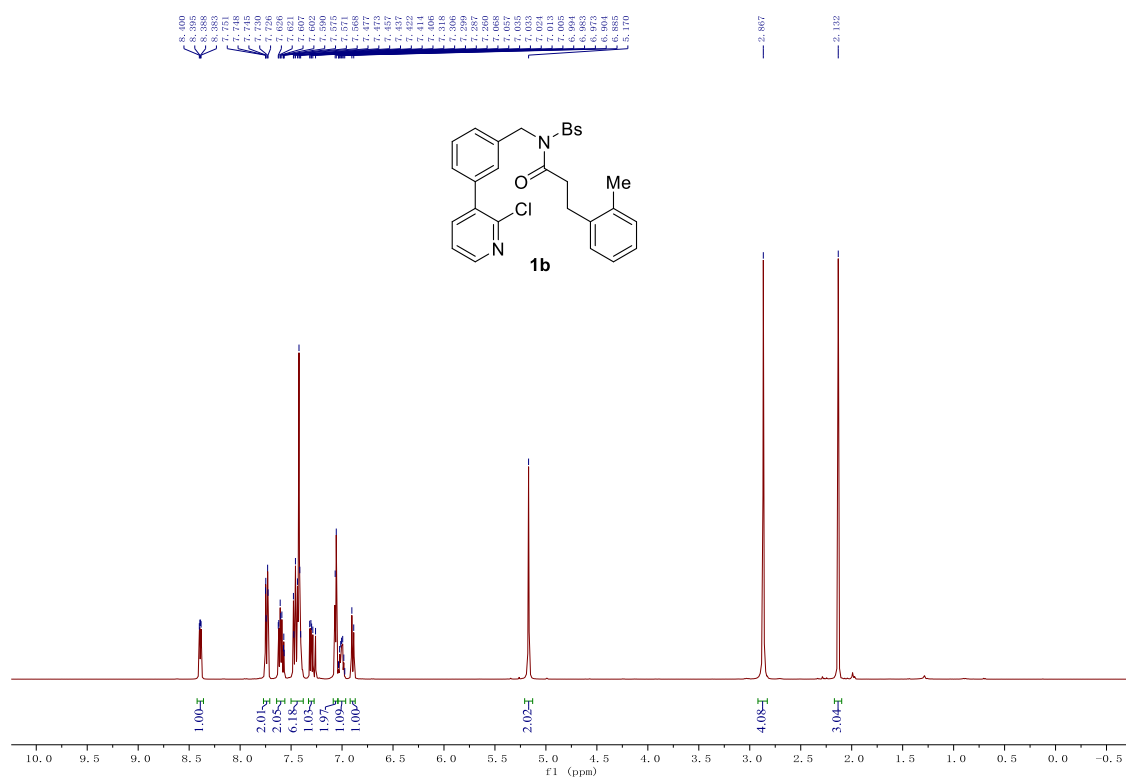

<sup>13</sup>C NMR (101 MHz, Chloroform-*d*)

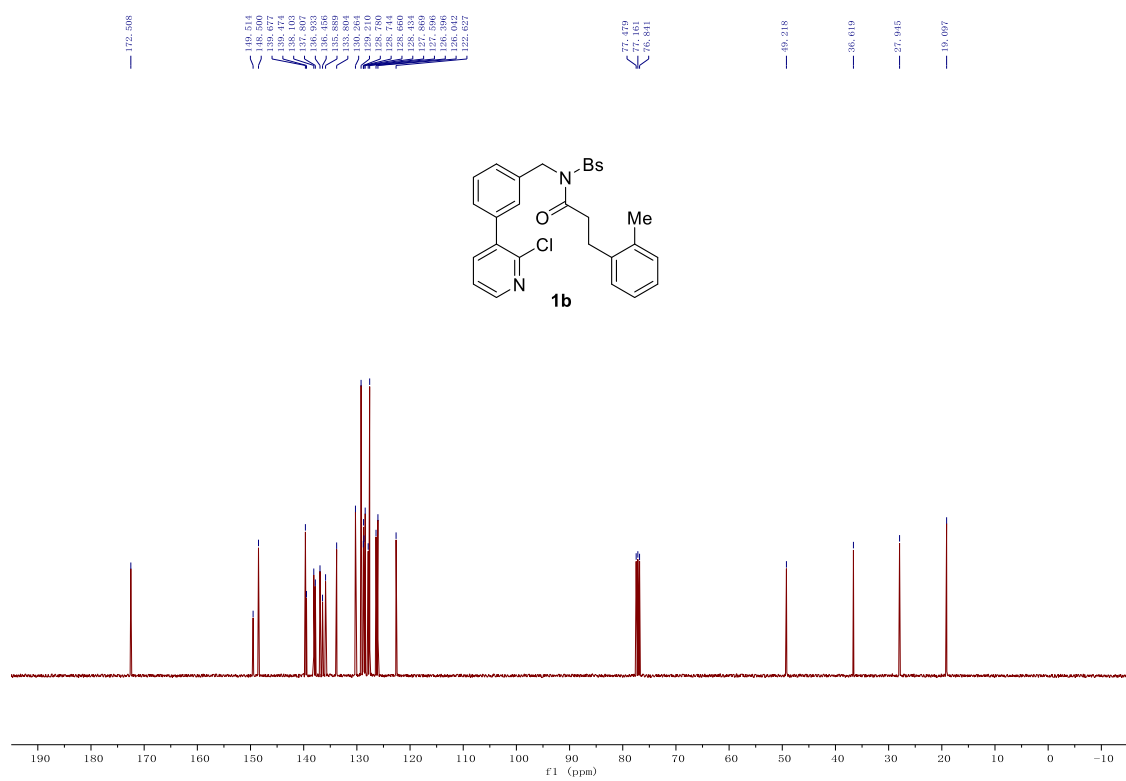

# <sup>1</sup>H NMR (400 MHz, Chloroform-*d*)

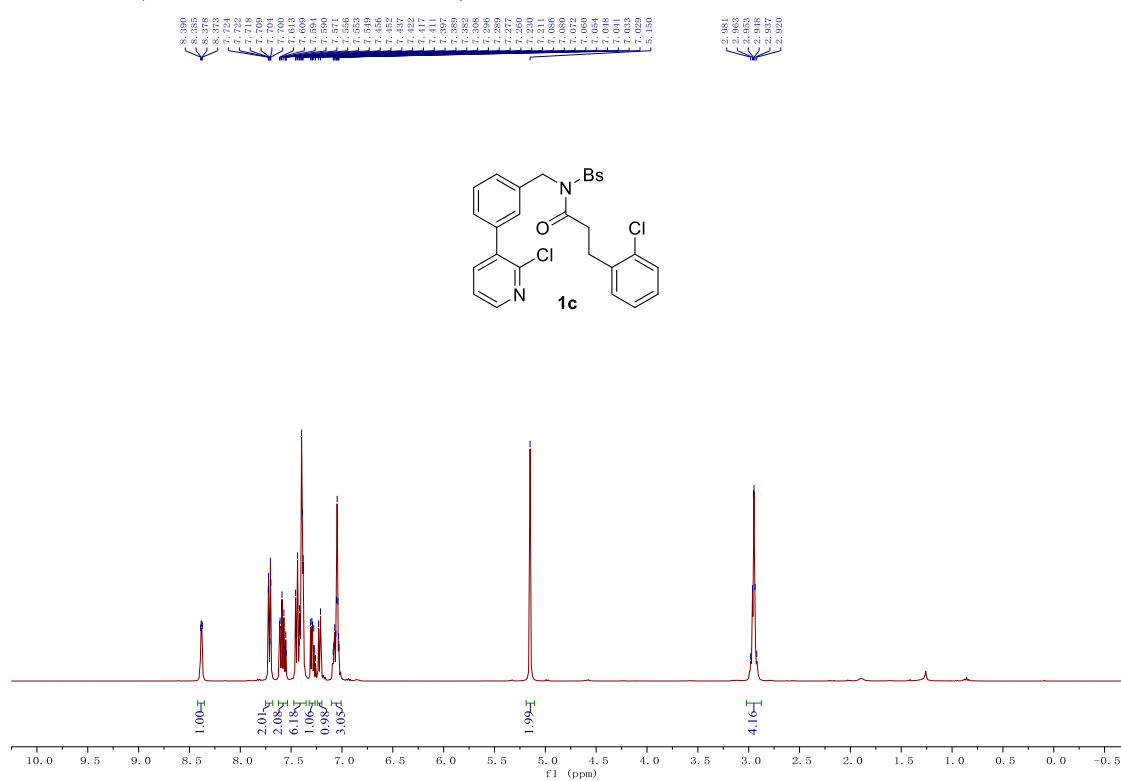

# <sup>13</sup>C NMR (101 MHz, Chloroform-*d*)

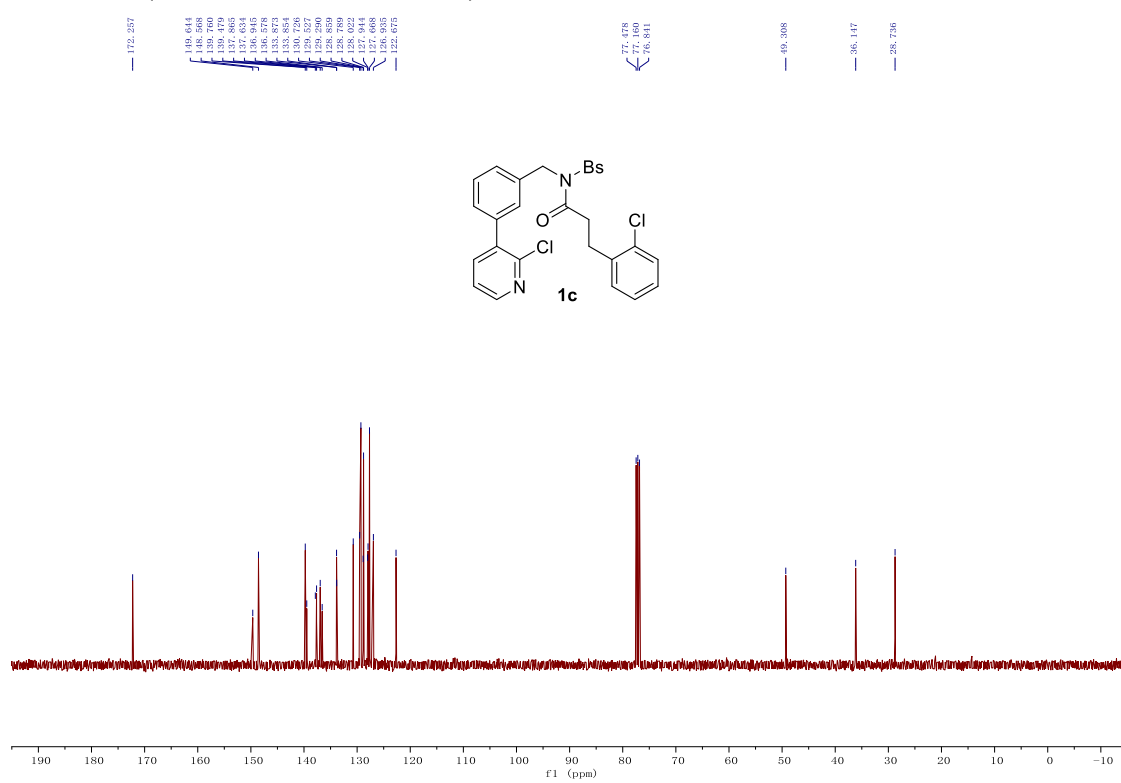

<sup>1</sup>H NMR (400 MHz, Chloroform-*d*)

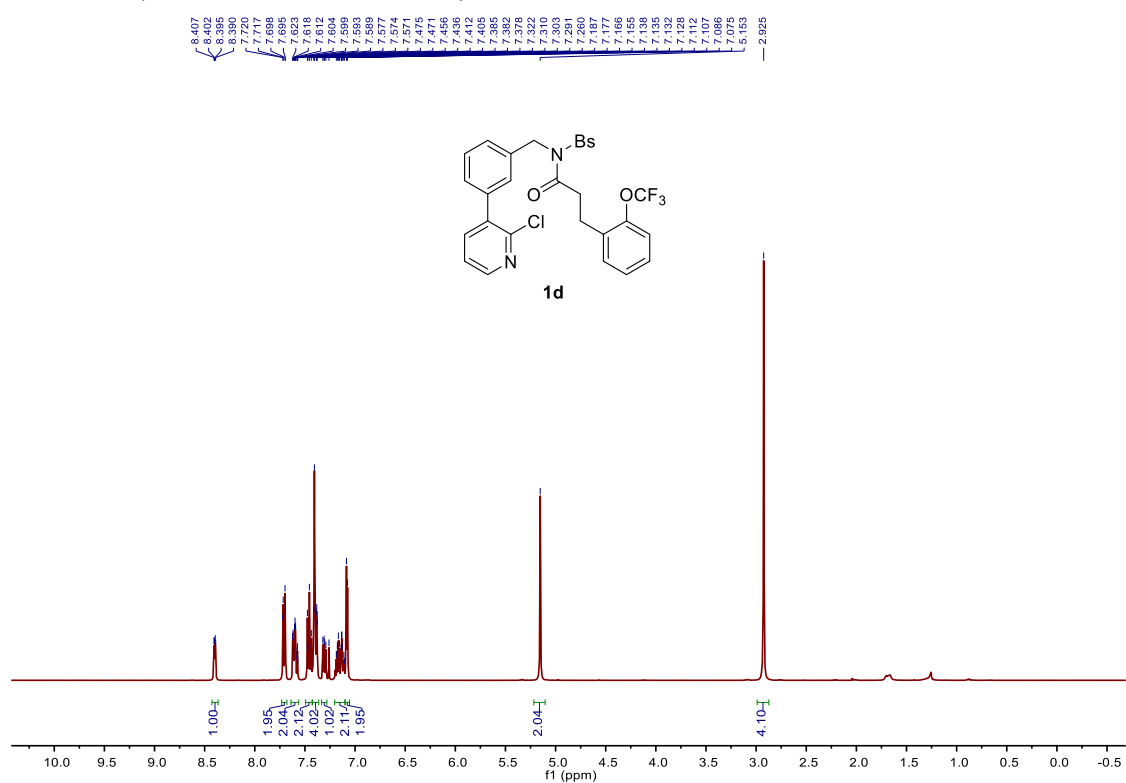

<sup>13</sup>C NMR (101 MHz, Chloroform-*d*)

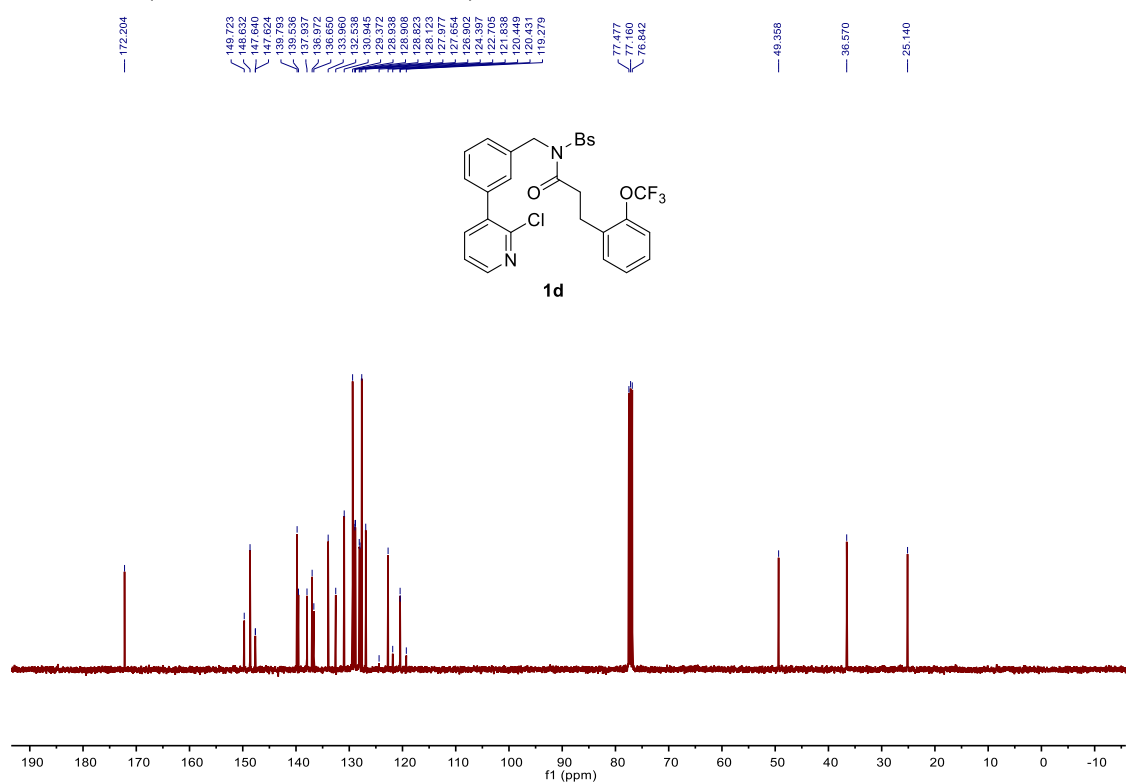

<sup>1</sup>H NMR (400 MHz, Chloroform-*d*)

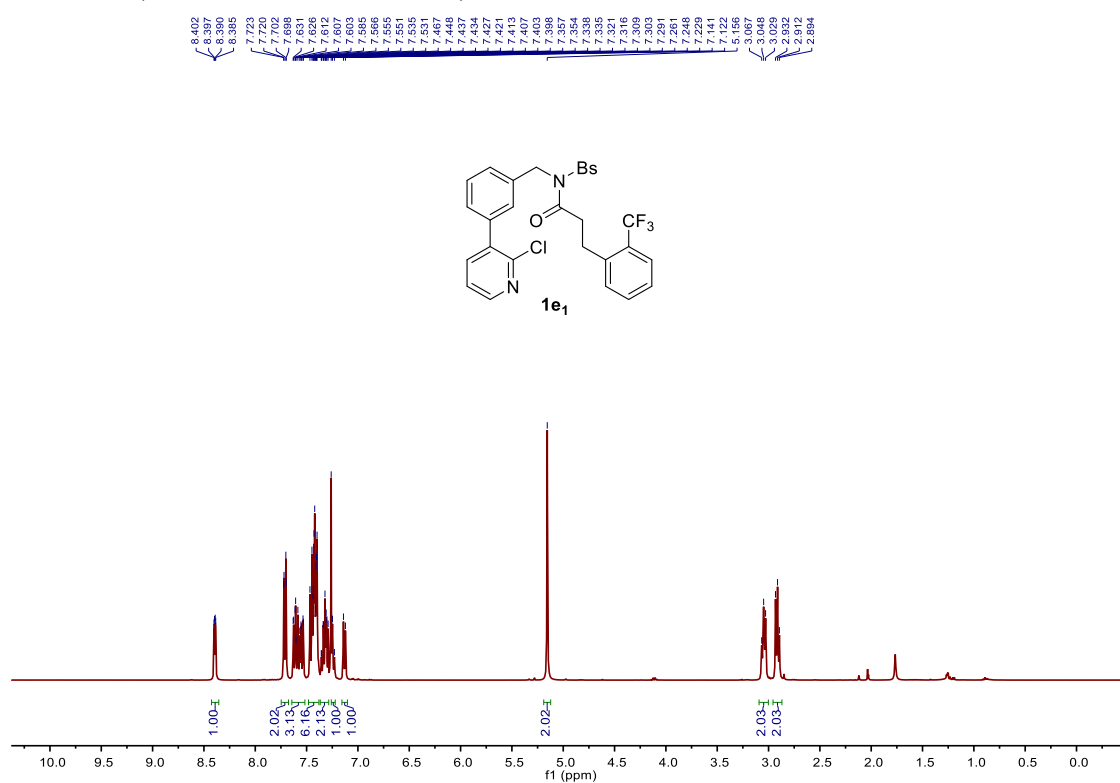

<sup>13</sup>C NMR (101 MHz, Chloroform-*d*)

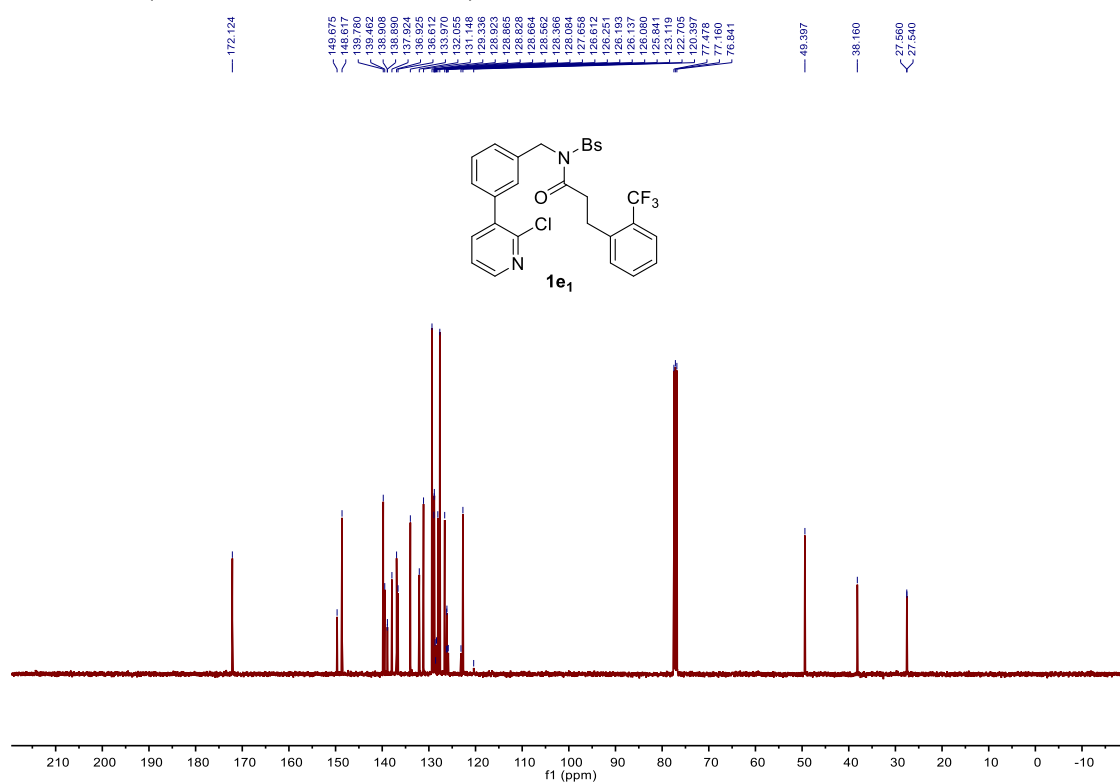

$^1\text{H}$  NMR (400 MHz, Chloroform-*d*)

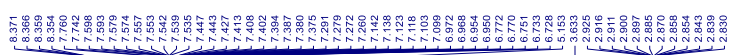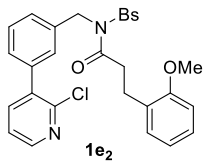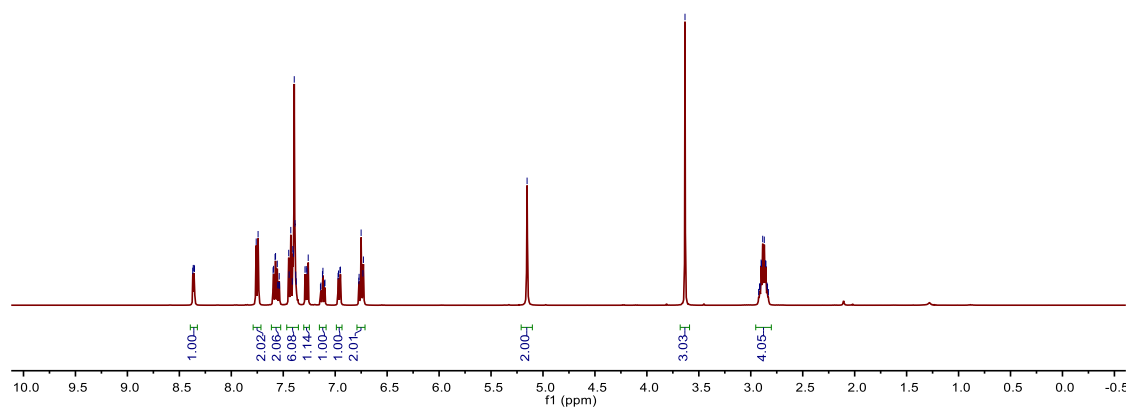

$^{13}\text{C}$  NMR (101 MHz, Chloroform-*d*)

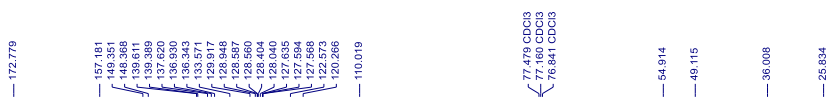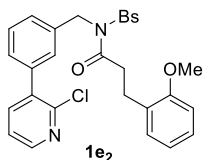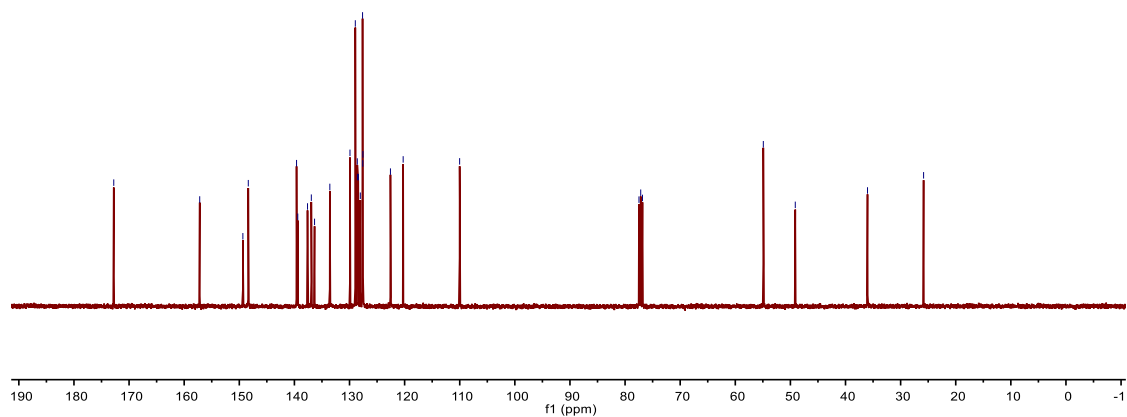

<sup>1</sup>H NMR (400 MHz, Chloroform-*d*)

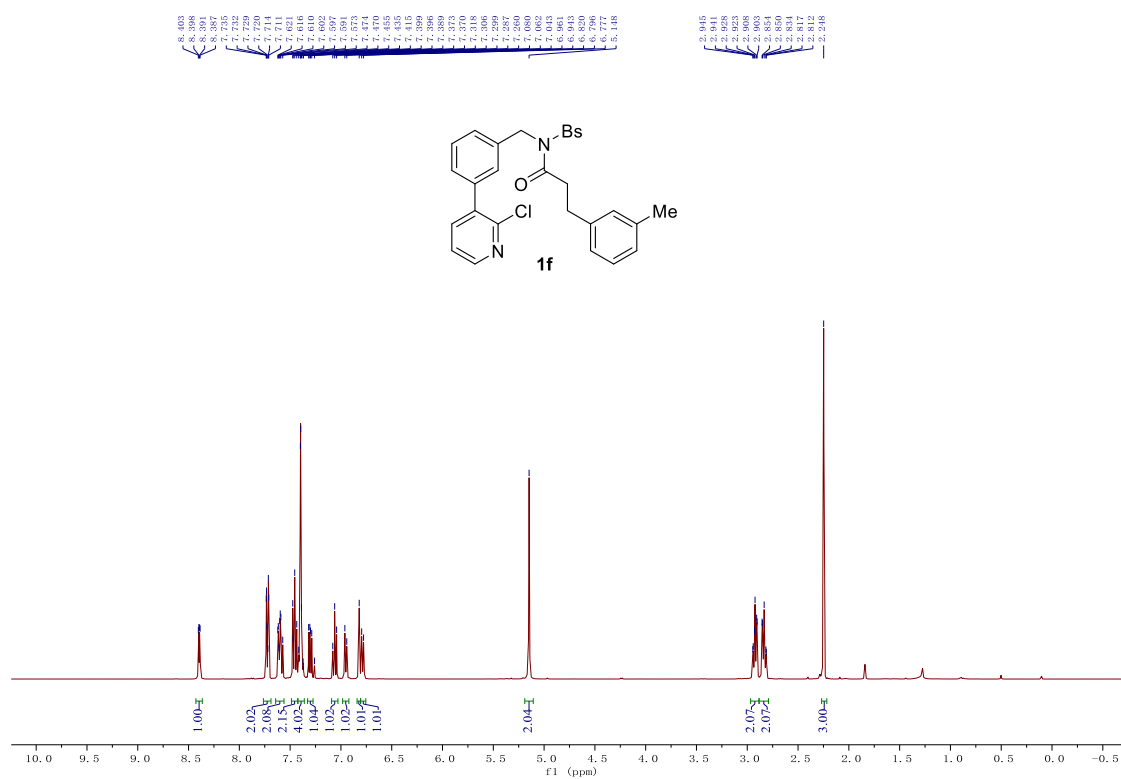

<sup>13</sup>C NMR (101 MHz, Chloroform-*d*)

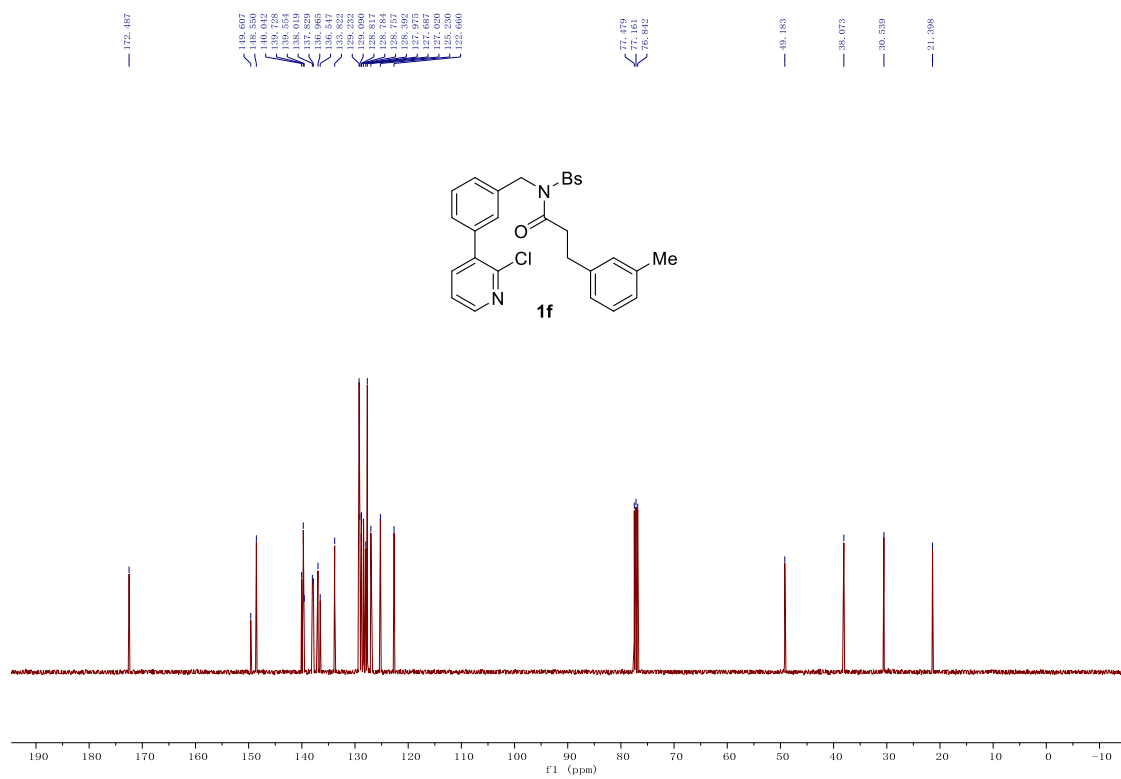

$^1\text{H}$  NMR (400 MHz, Chloroform-*d*)

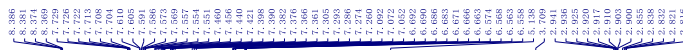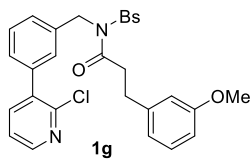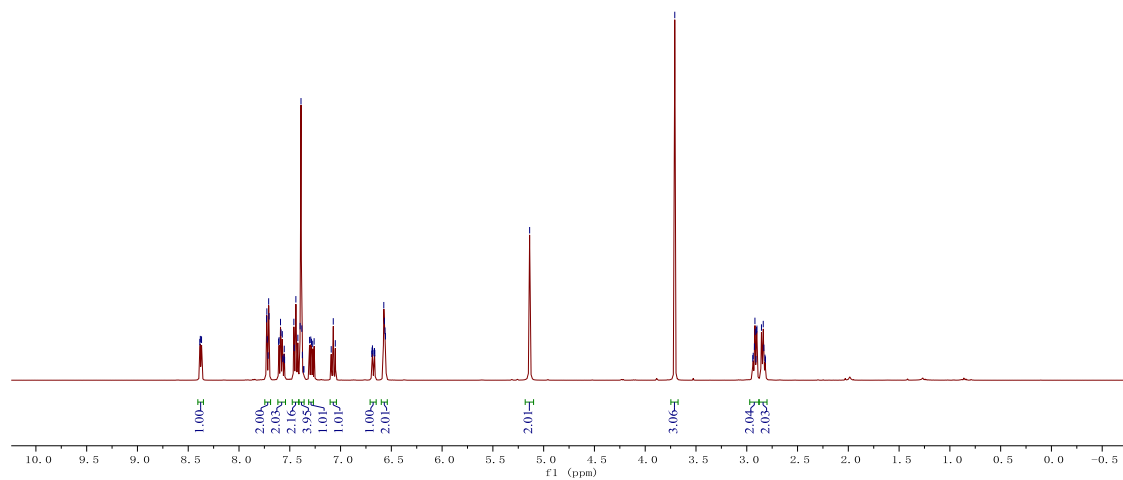

$^{13}\text{C}$  NMR (101 MHz, Chloroform-*d*)

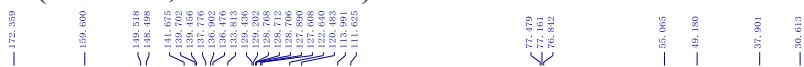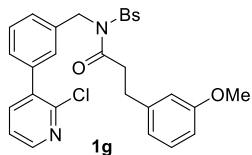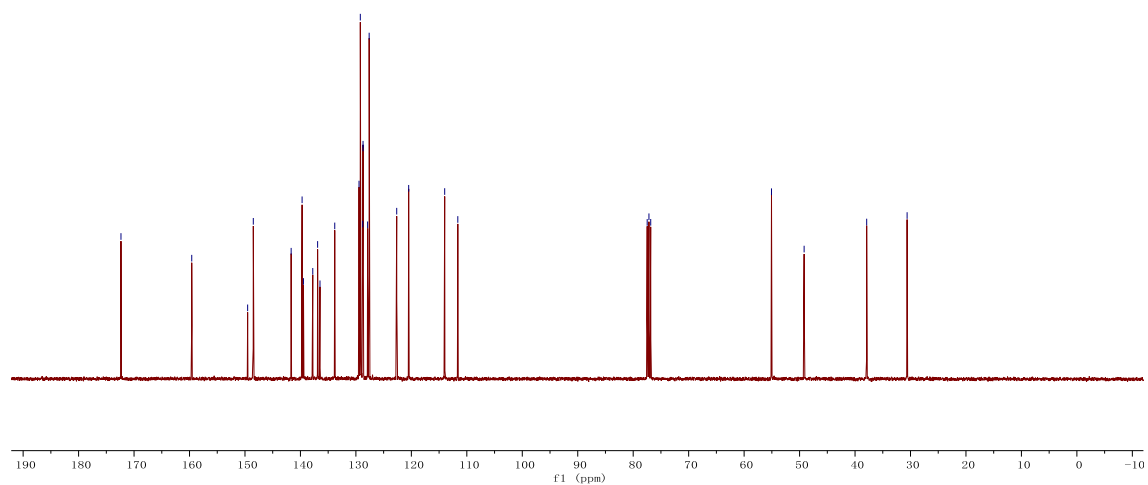



<sup>1</sup>H NMR (400 MHz, Chloroform-*d*)

8.411, 8.406, 8.399, 8.394, 8.083, 8.080, 7.872, 7.868, 7.821, 7.607, 7.596, 7.583, 7.474, 7.471, 7.463, 7.439, 7.401, 7.382, 7.379, 7.359, 7.357, 7.345, 7.297, 7.131, 7.111, 7.096, 7.077, 6.881, 6.810, 6.803, 6.782, 6.771, 6.752, 6.749, 6.632, 6.616, 6.622, 6.622, 6.614, 6.599, 6.598, 6.595, 6.581, 6.563, 6.548, 6.533

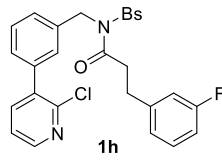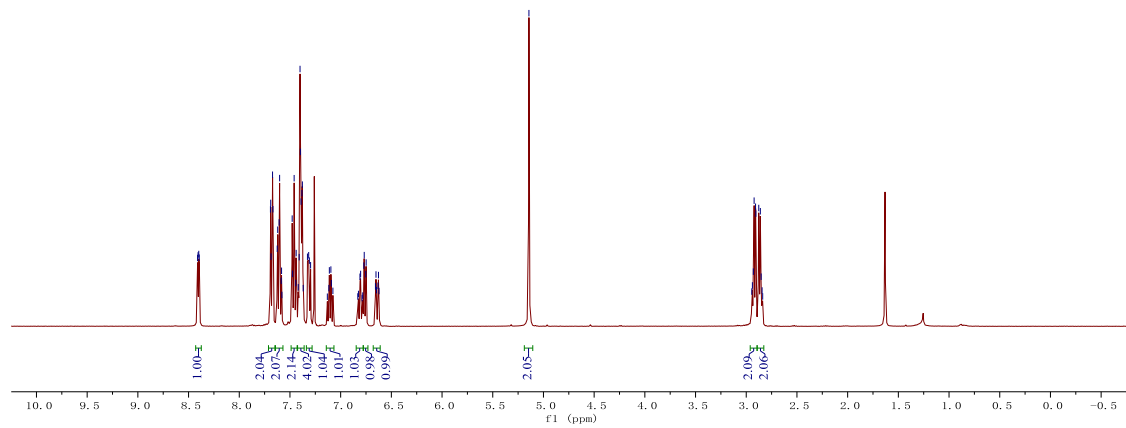

<sup>13</sup>C NMR (101 MHz, Chloroform-*d*)

172.194, 164.081, 161.638, 149.711, 148.665, 142.775, 139.809, 139.629, 138.981, 138.659, 133.036, 129.952, 129.010, 128.996, 128.222, 127.652, 124.083, 122.734, 115.337, 113.373, 113.161, 77.477, 77.460, 76.842, 37.818, 30.373, 30.345

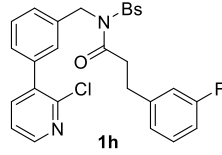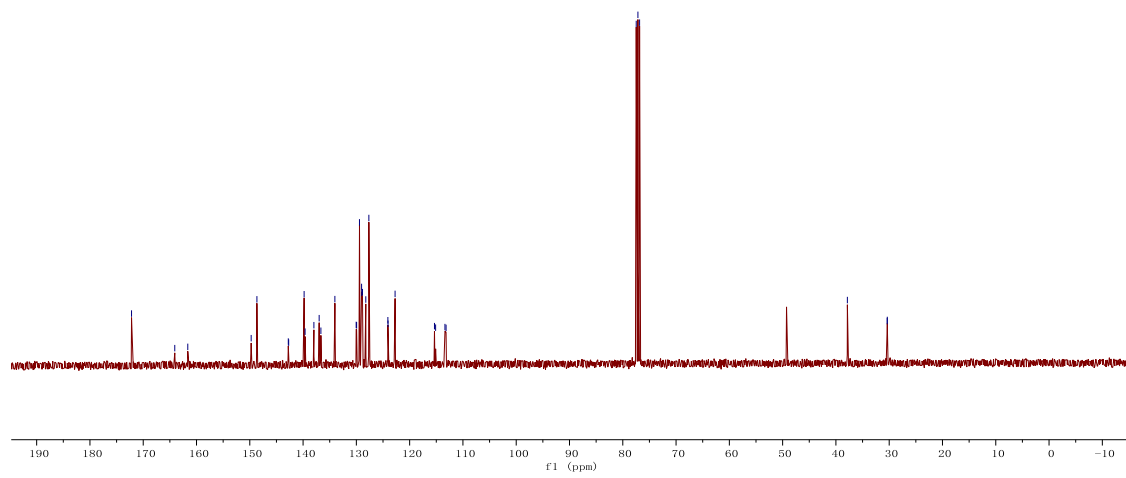



<sup>1</sup>H NMR (400 MHz, Chloroform-*d*)

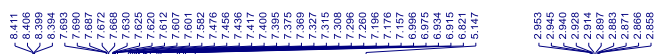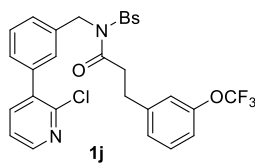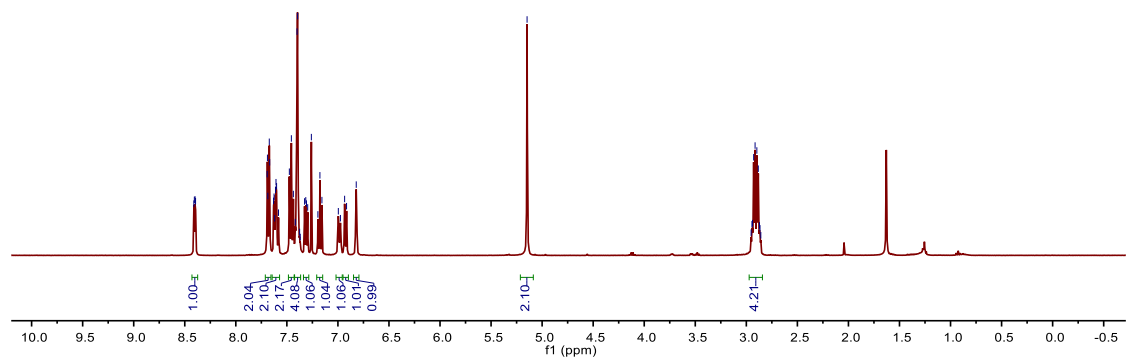

<sup>13</sup>C NMR (101 MHz, Chloroform-*d*)

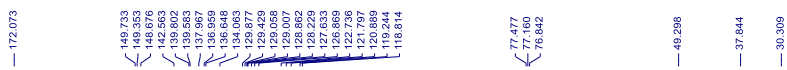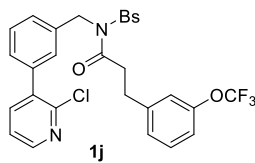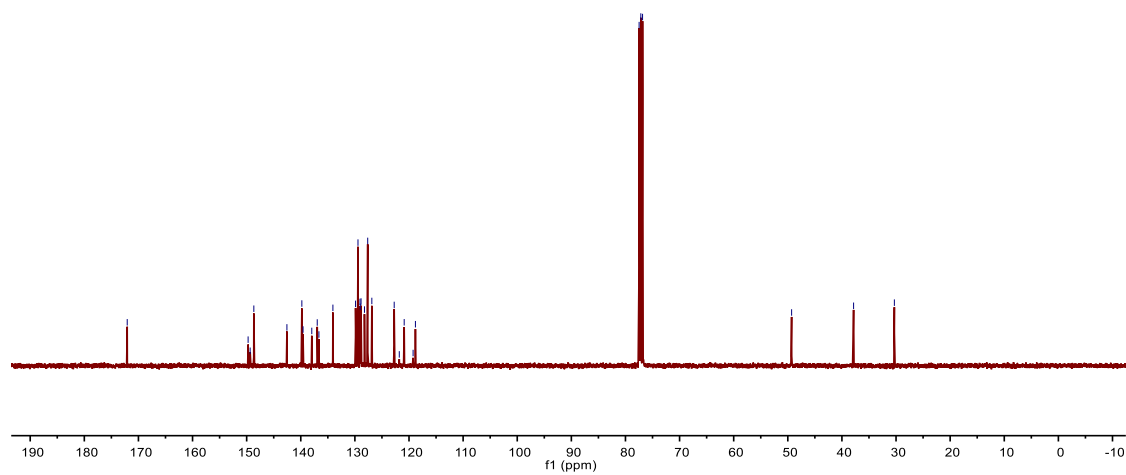

# <sup>1</sup>H NMR (400 MHz, Chloroform-*d*)

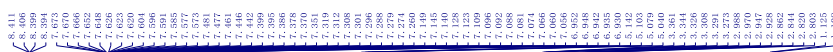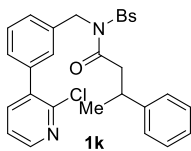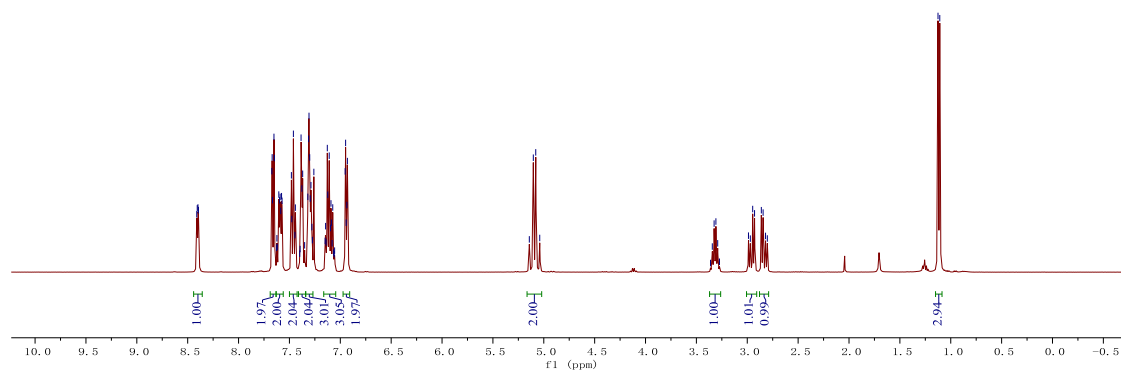

# <sup>13</sup>C NMR (101 MHz, Chloroform-*d*)

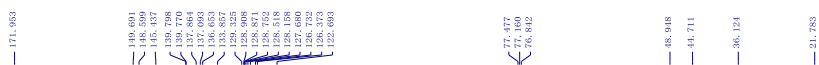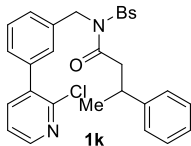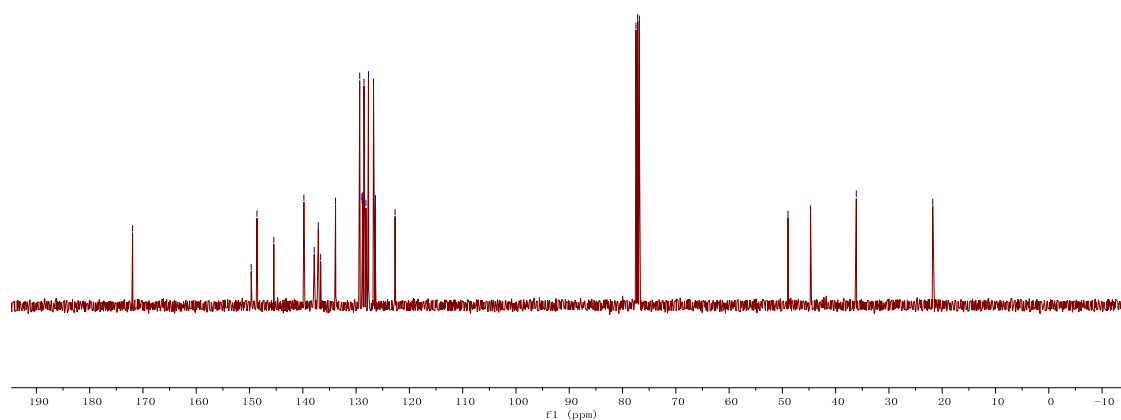

# <sup>1</sup>H NMR (400 MHz, Chloroform-*d*)

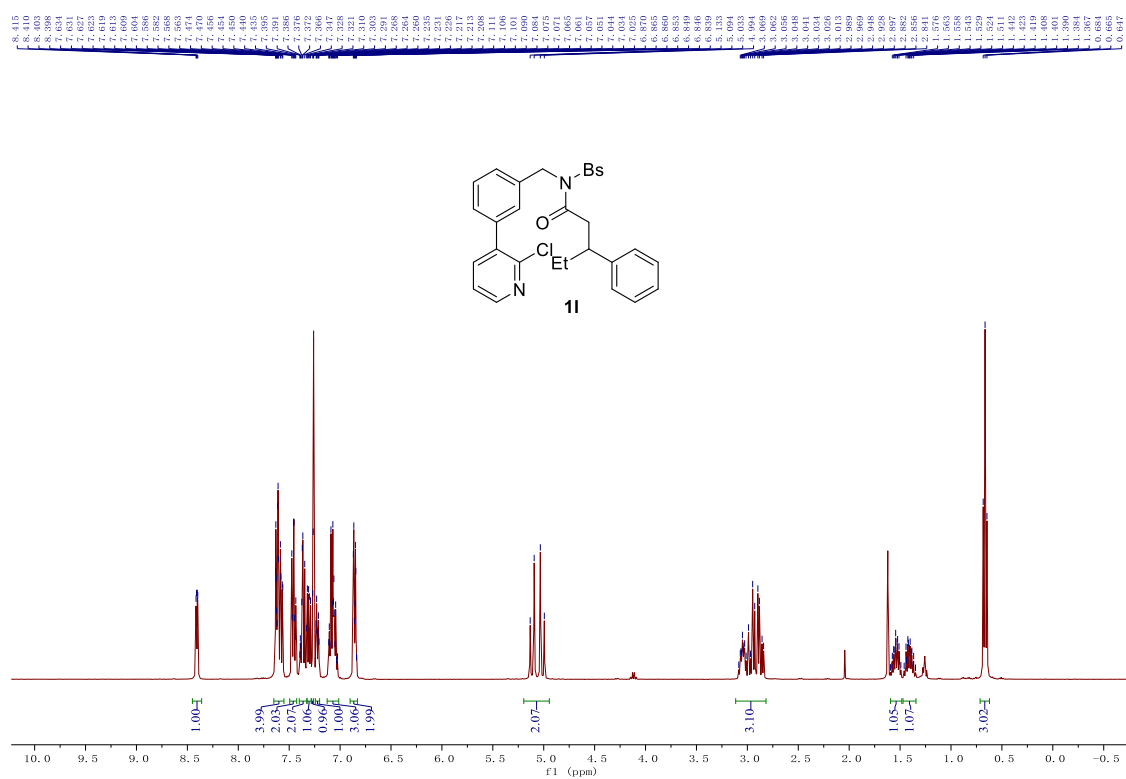

# <sup>13</sup>C NMR (101 MHz, Chloroform-*d*)

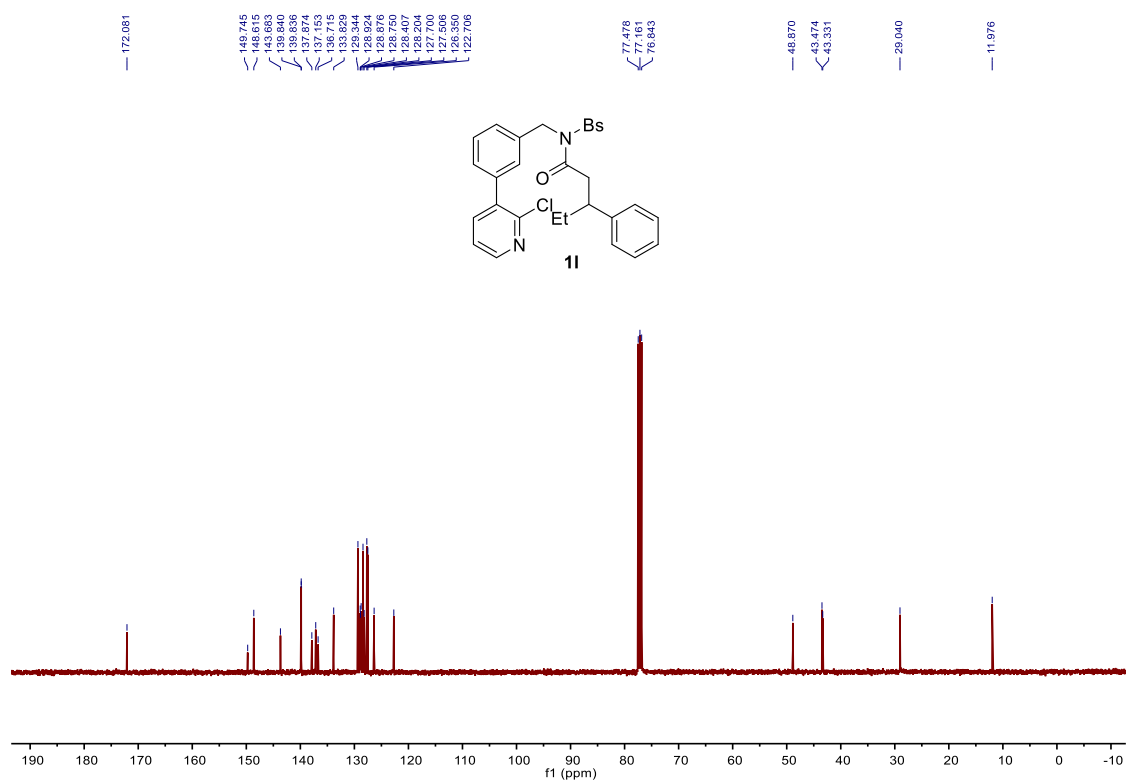

# <sup>1</sup>H NMR (400 MHz, Chloroform-*d*)

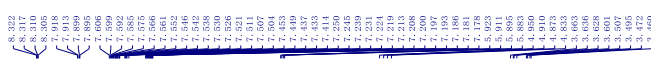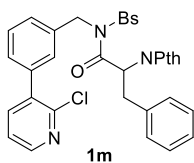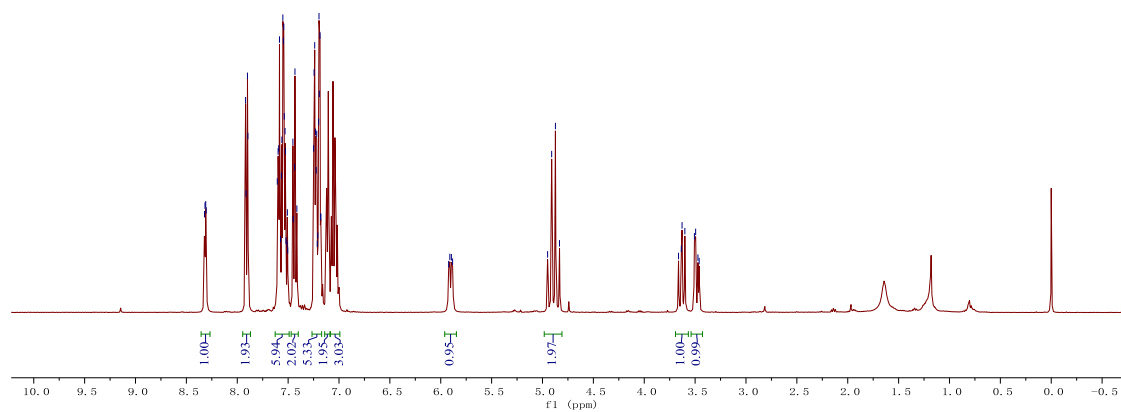

# <sup>13</sup>C NMR (101 MHz, Chloroform-*d*)

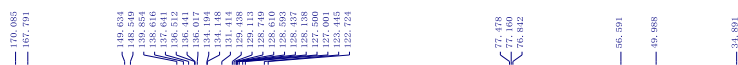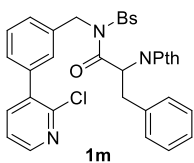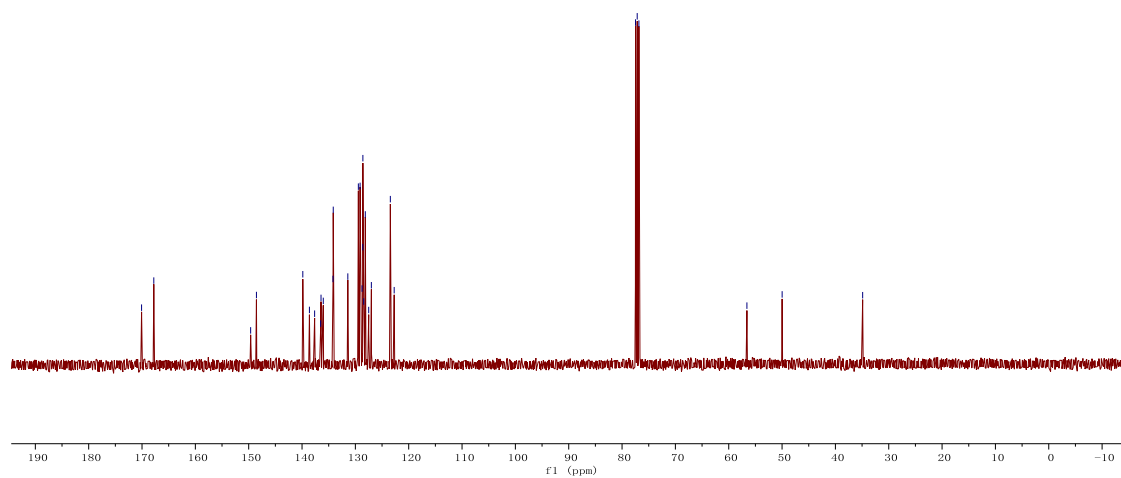

# $^1\text{H}$ NMR (400 MHz, Chloroform-*d*)

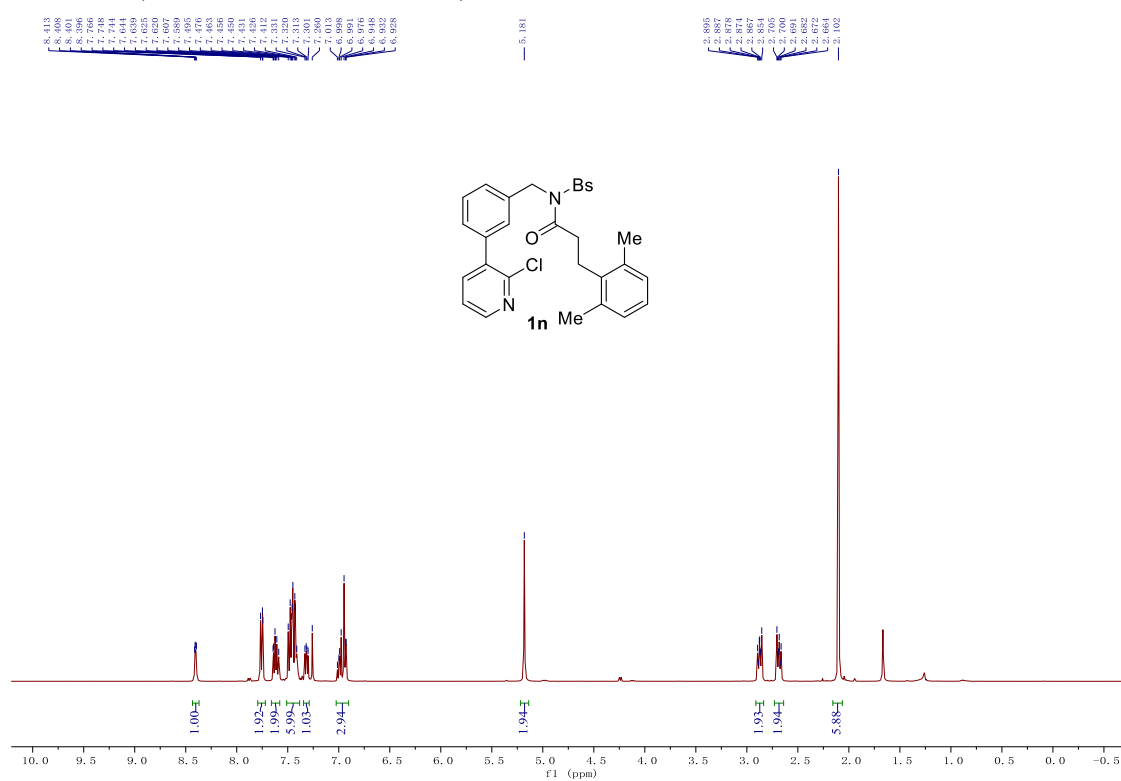

# $^{13}\text{C}$ NMR (101 MHz, Chloroform-*d*)

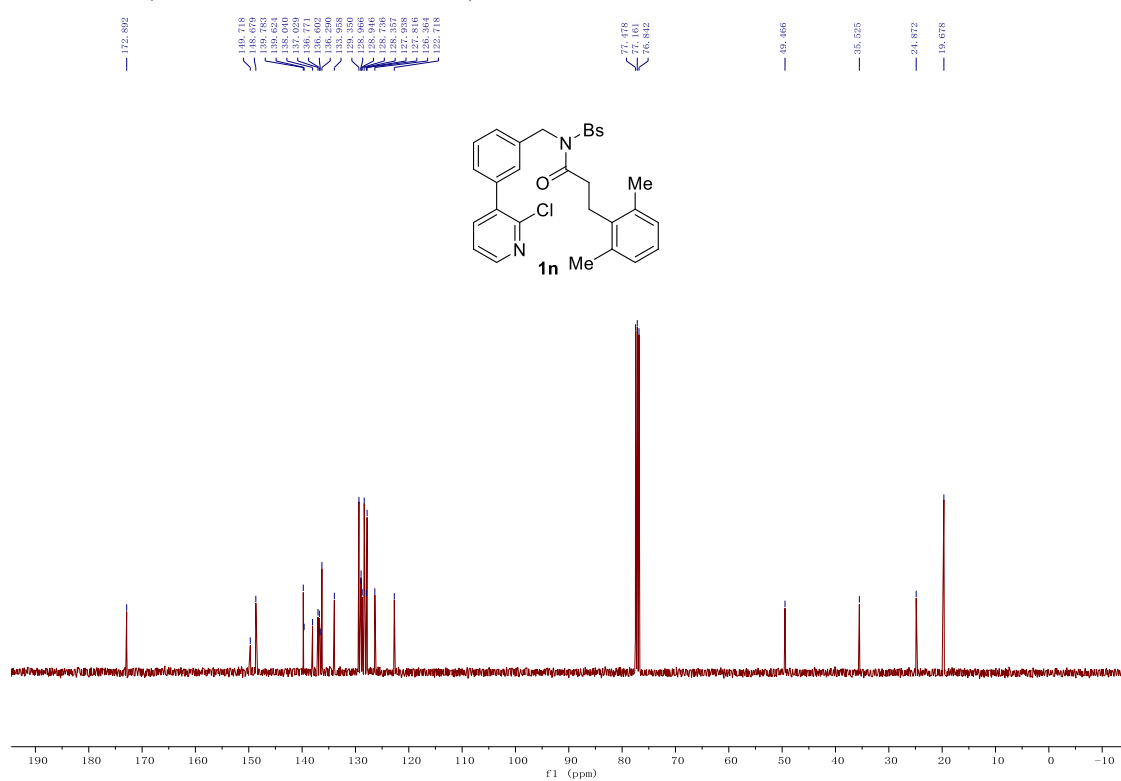

# <sup>1</sup>H NMR (400 MHz, Chloroform-*d*)

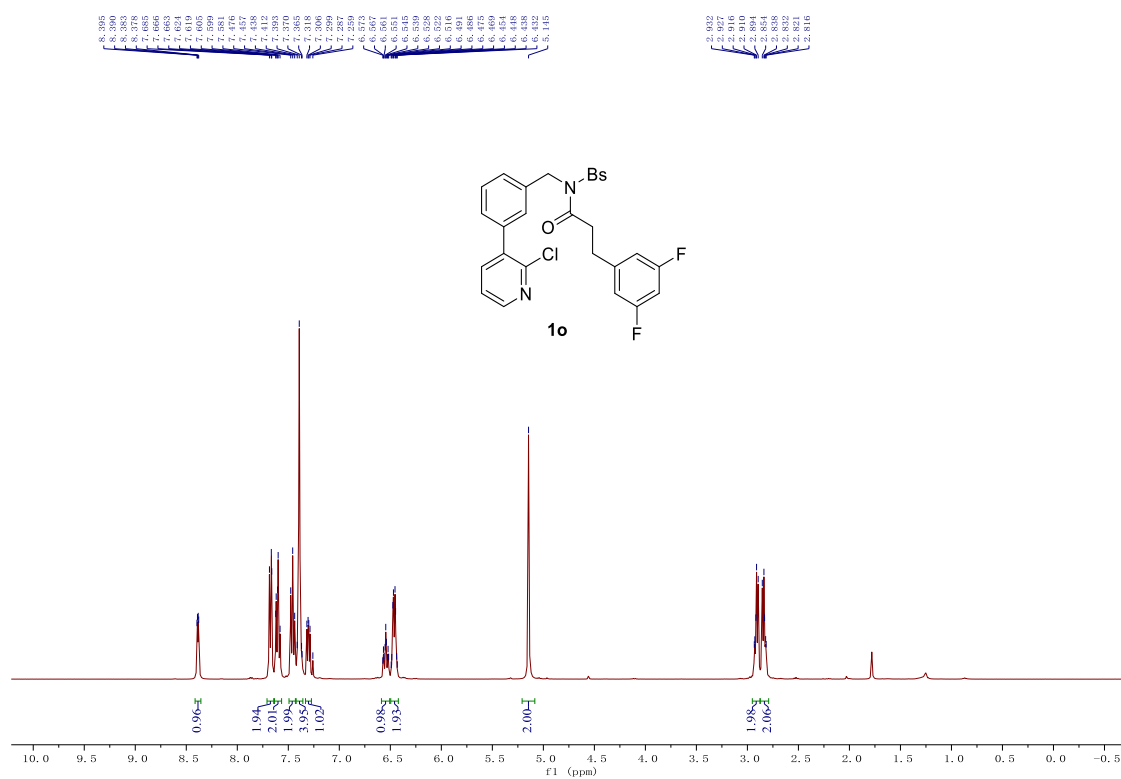

# <sup>13</sup>C NMR (101 MHz, Chloroform-*d*)

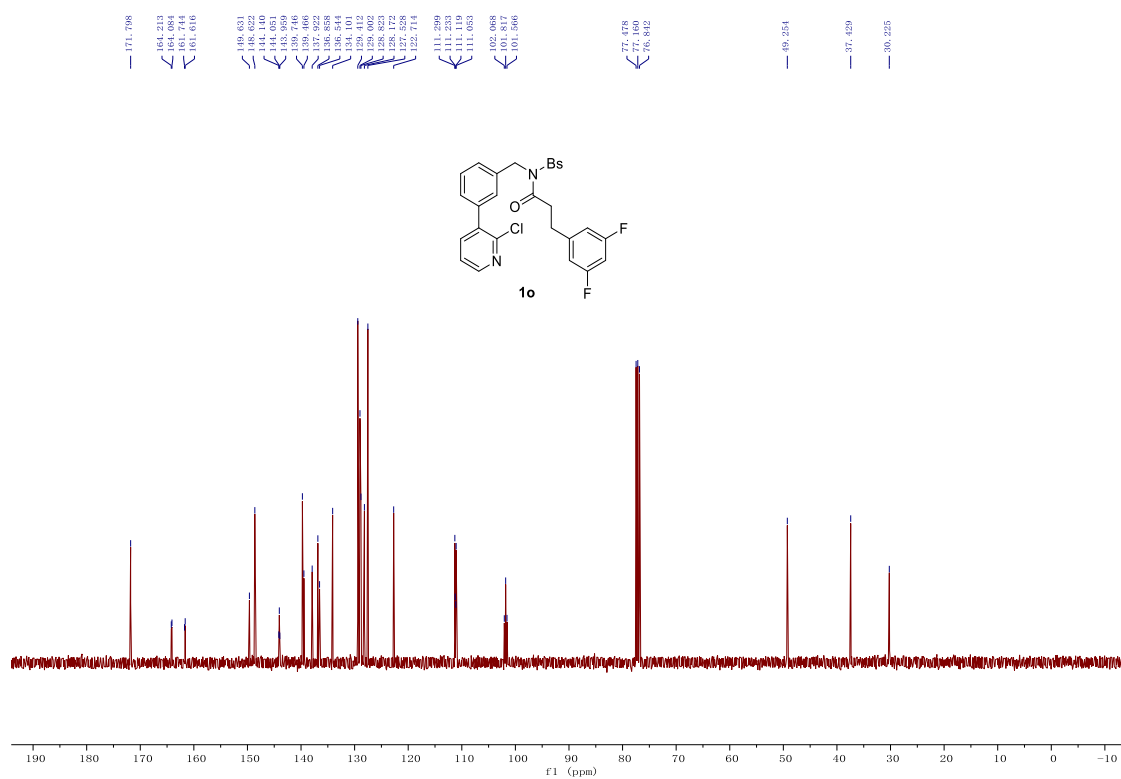



<sup>1</sup>H NMR (400 MHz, Chloroform-*d*)

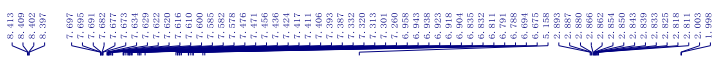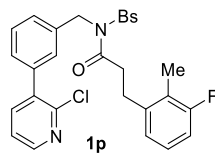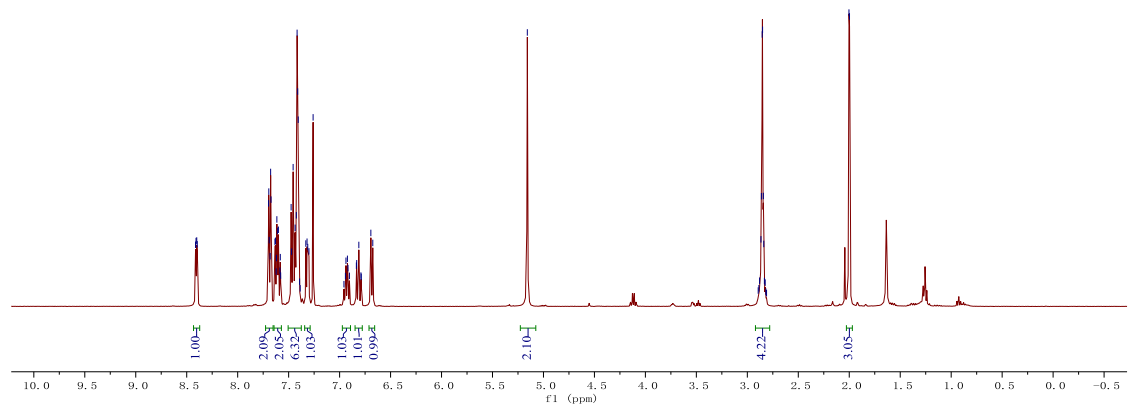

<sup>13</sup>C NMR (101 MHz, Chloroform-*d*)

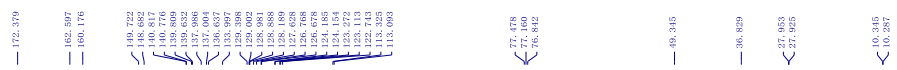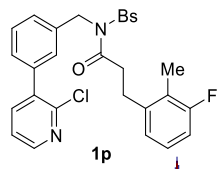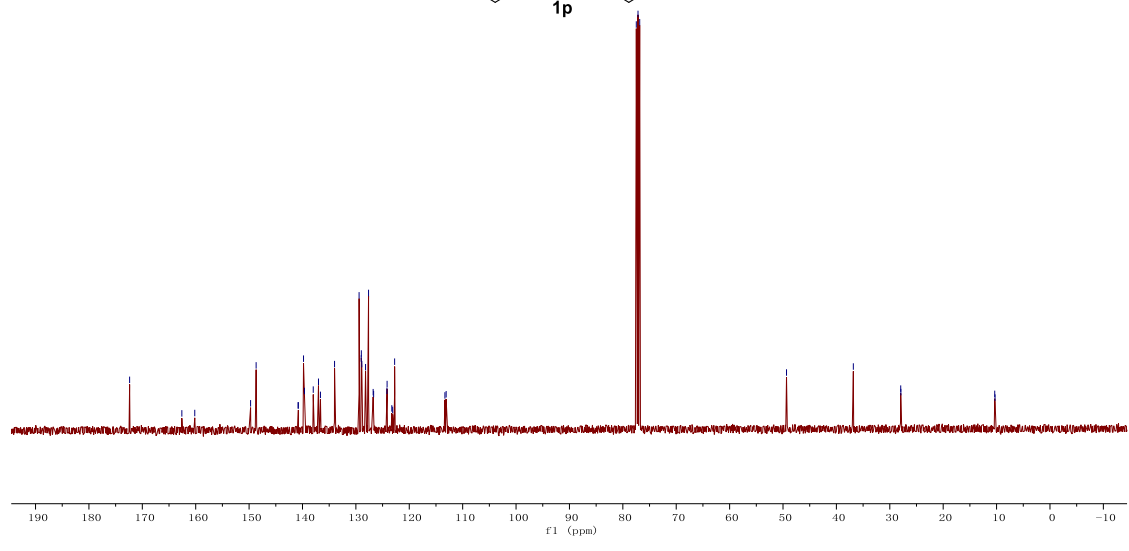

<sup>1</sup>H NMR (400 MHz, Chloroform-*d*)

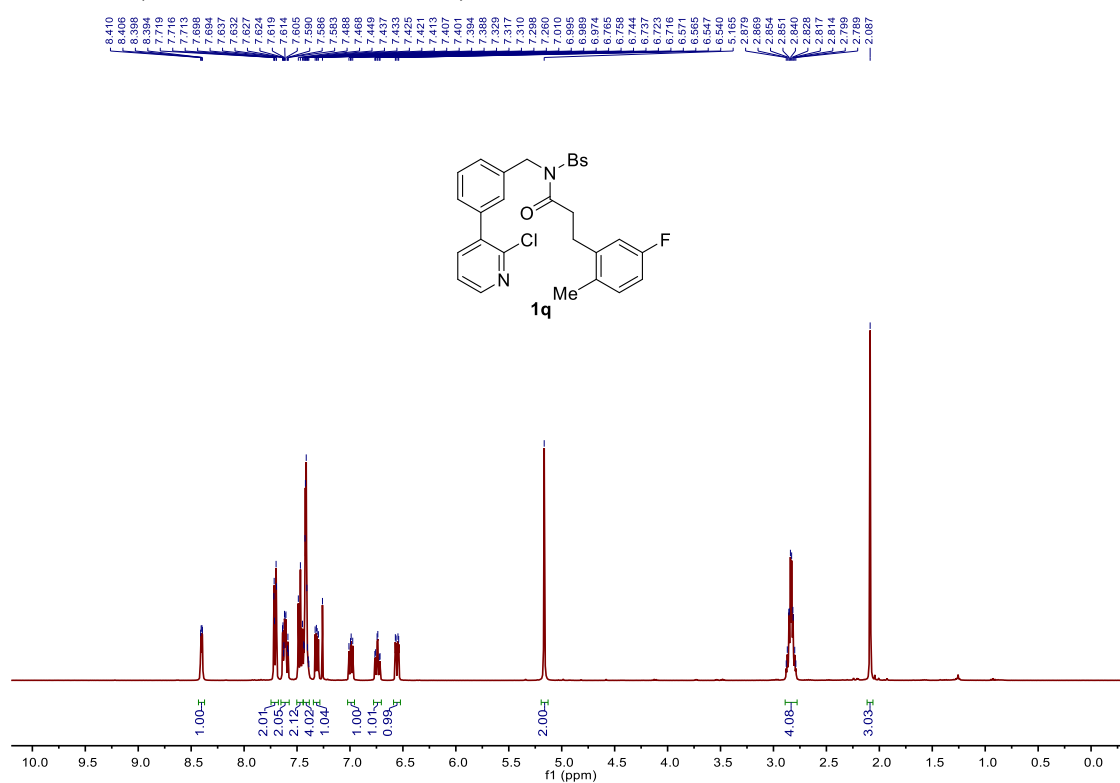

<sup>13</sup>C NMR (101 MHz, Chloroform-*d*)

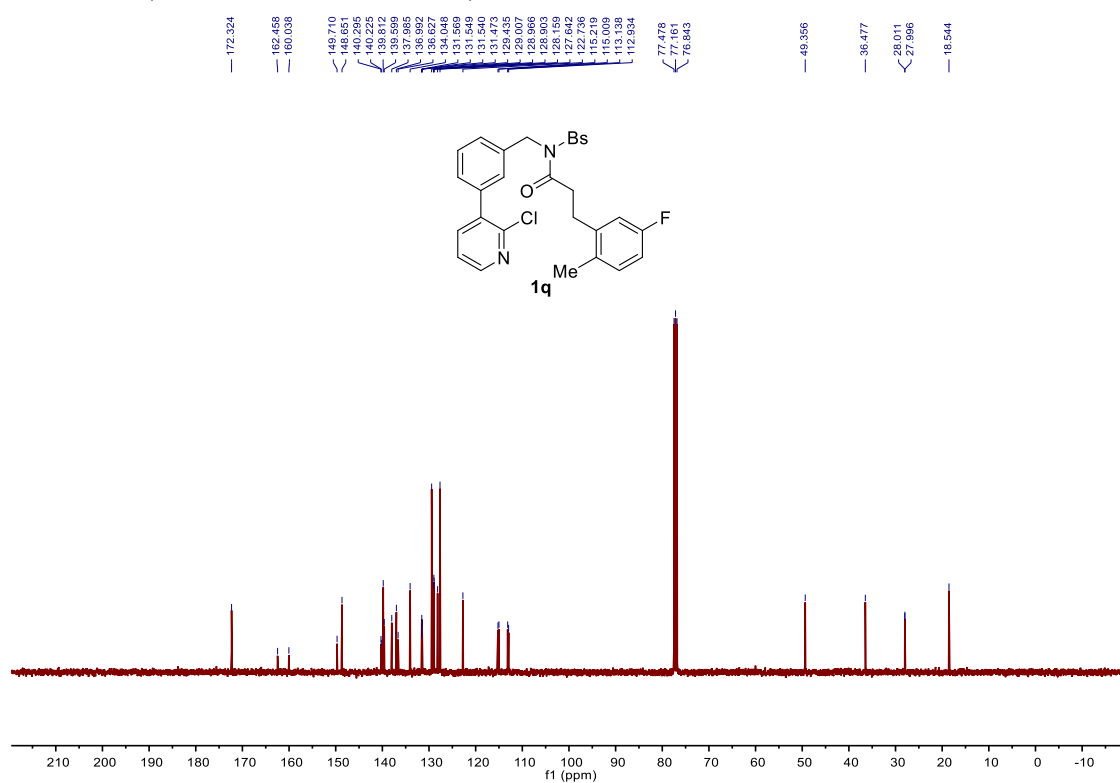

<sup>1</sup>H NMR (400 MHz, Chloroform-*d*)

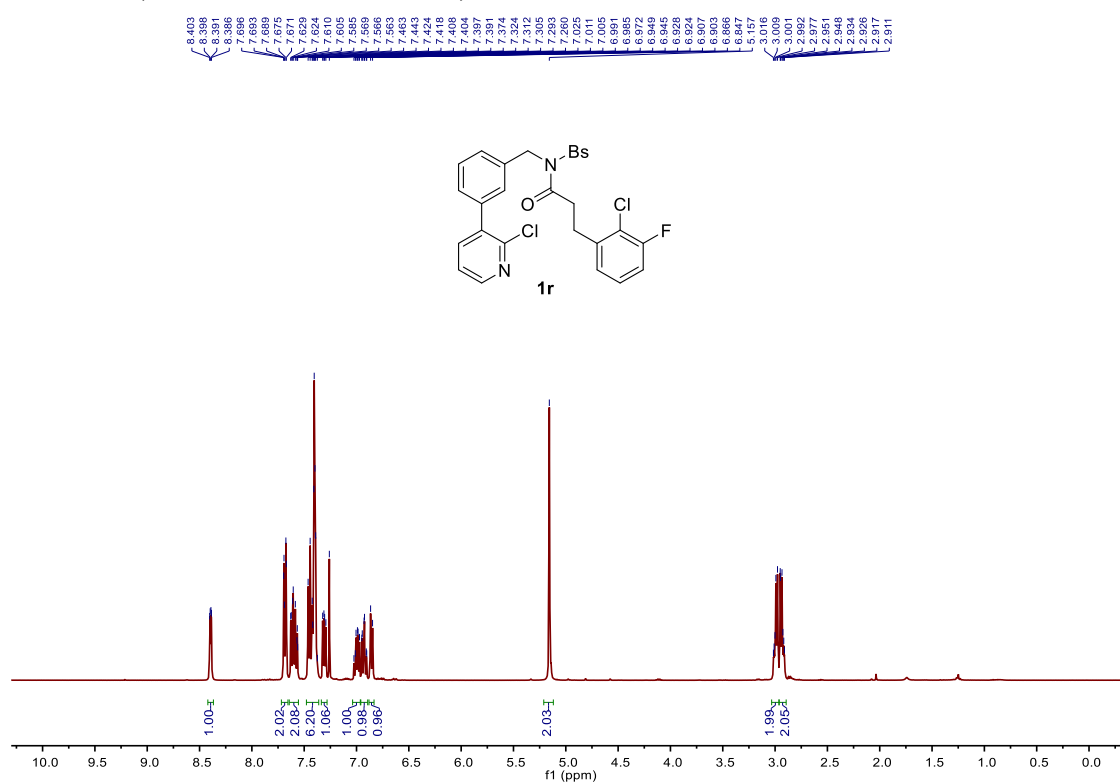

<sup>13</sup>C NMR (101 MHz, Chloroform-*d*)

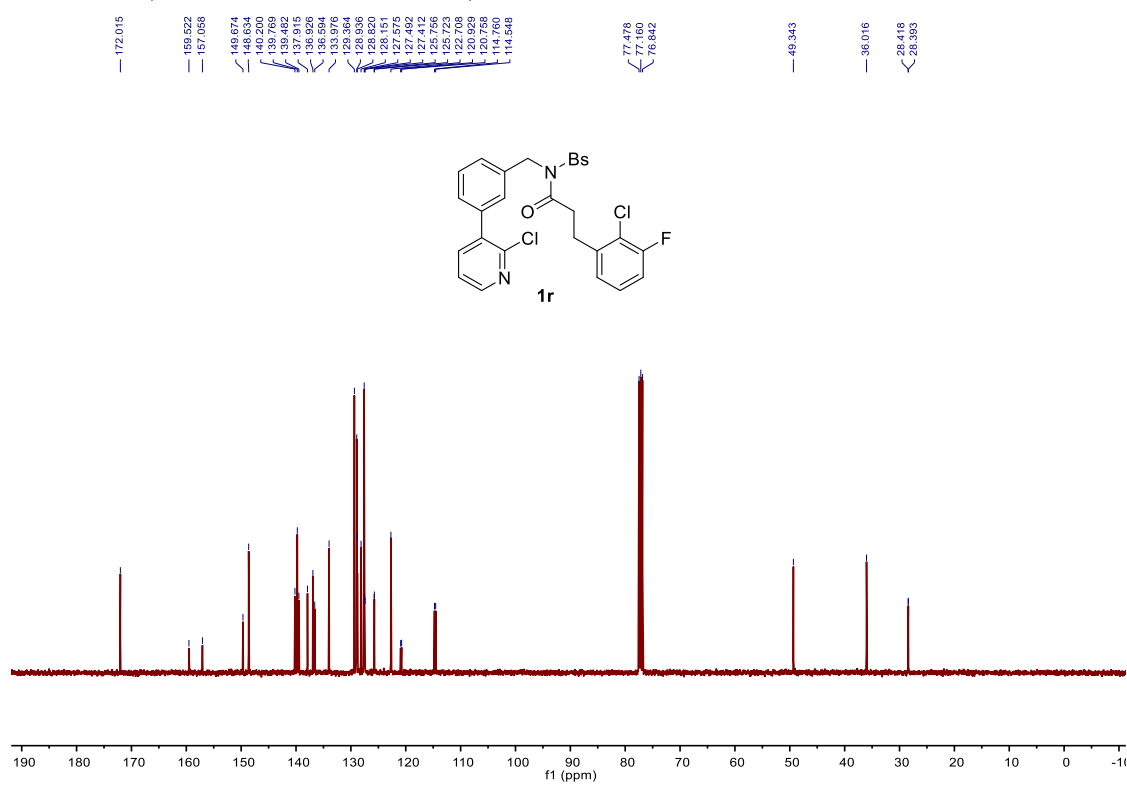

<sup>1</sup>H NMR (400 MHz, Chloroform-*d*)

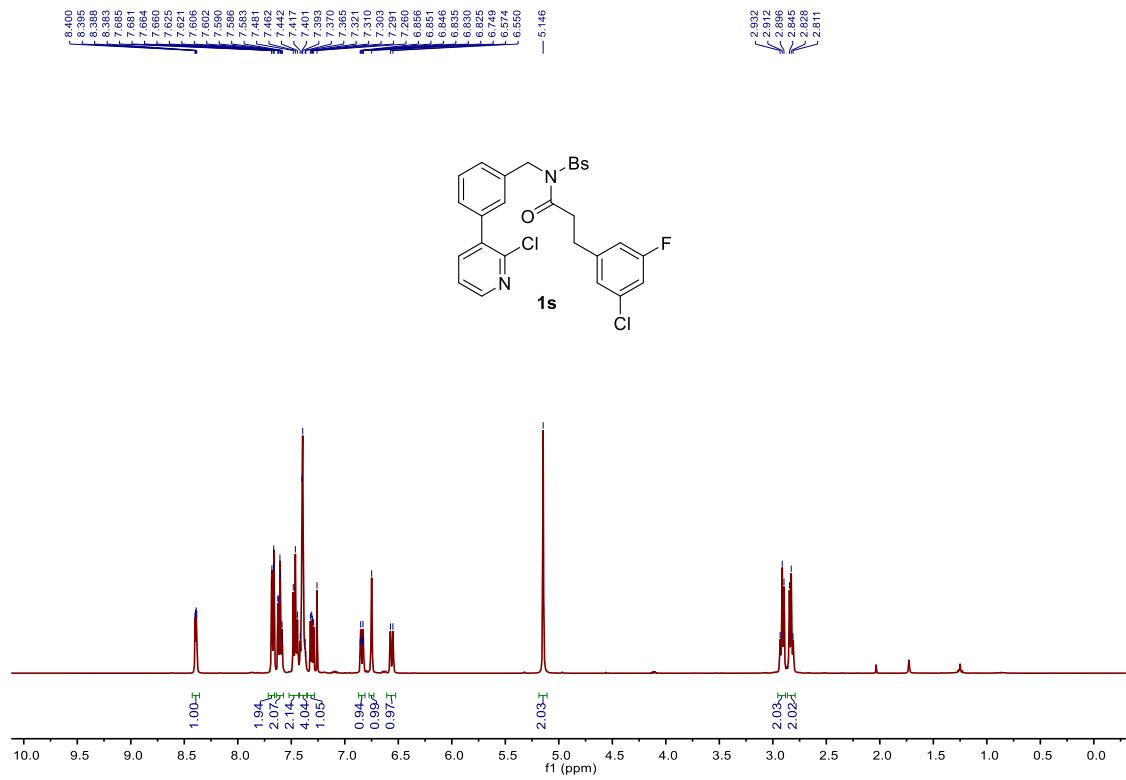

<sup>13</sup>C NMR (101 MHz, Chloroform-*d*)

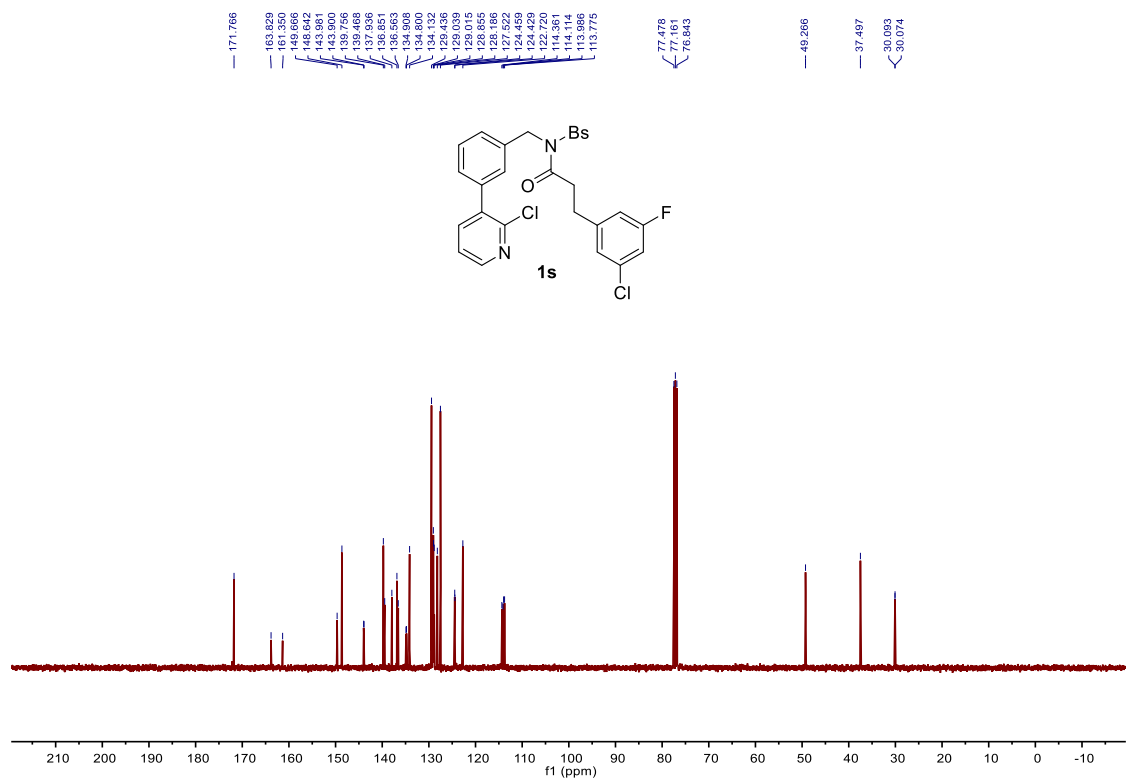

# <sup>1</sup>H NMR (400 MHz, Chloroform-*d*)

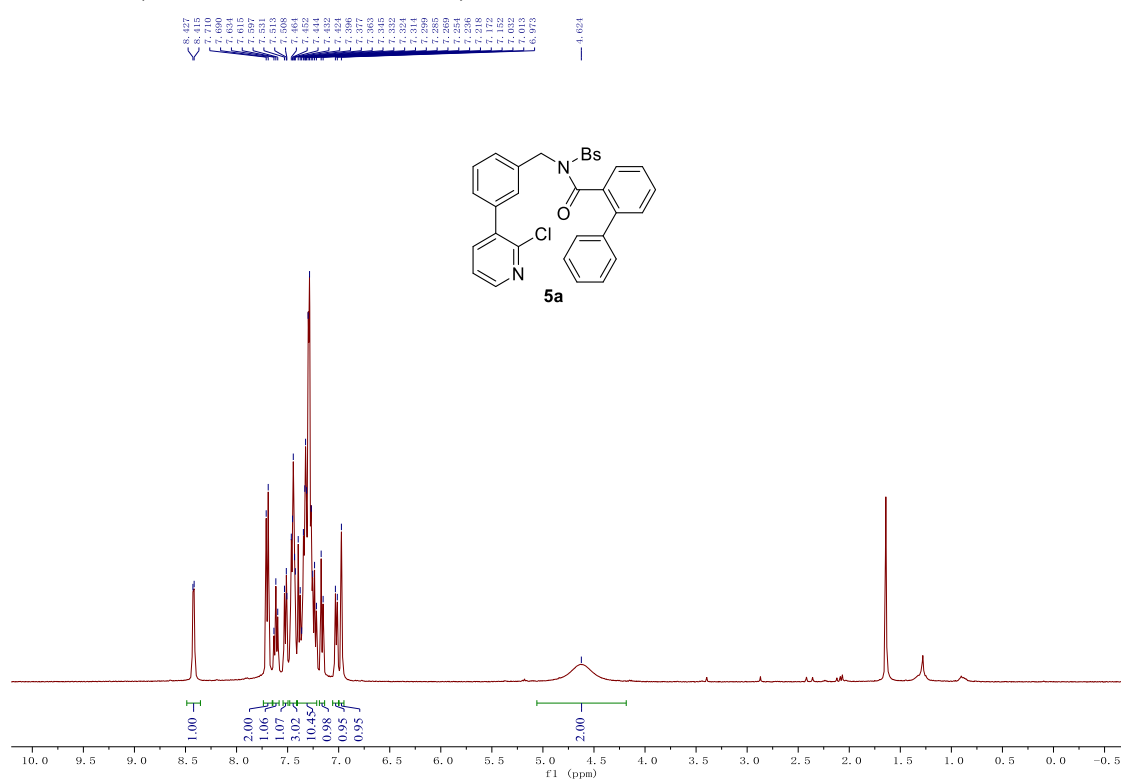

# <sup>13</sup>C NMR (101 MHz, Chloroform-*d*)

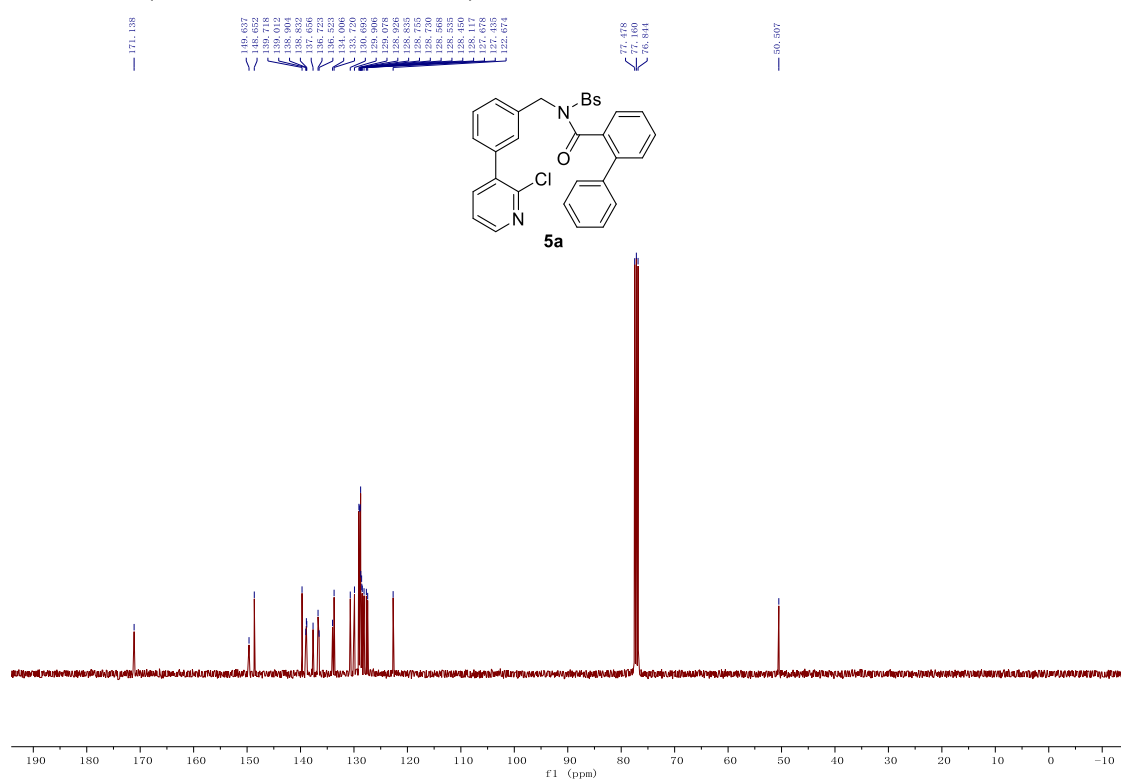

<sup>1</sup>H NMR (400 MHz, Chloroform-*d*)

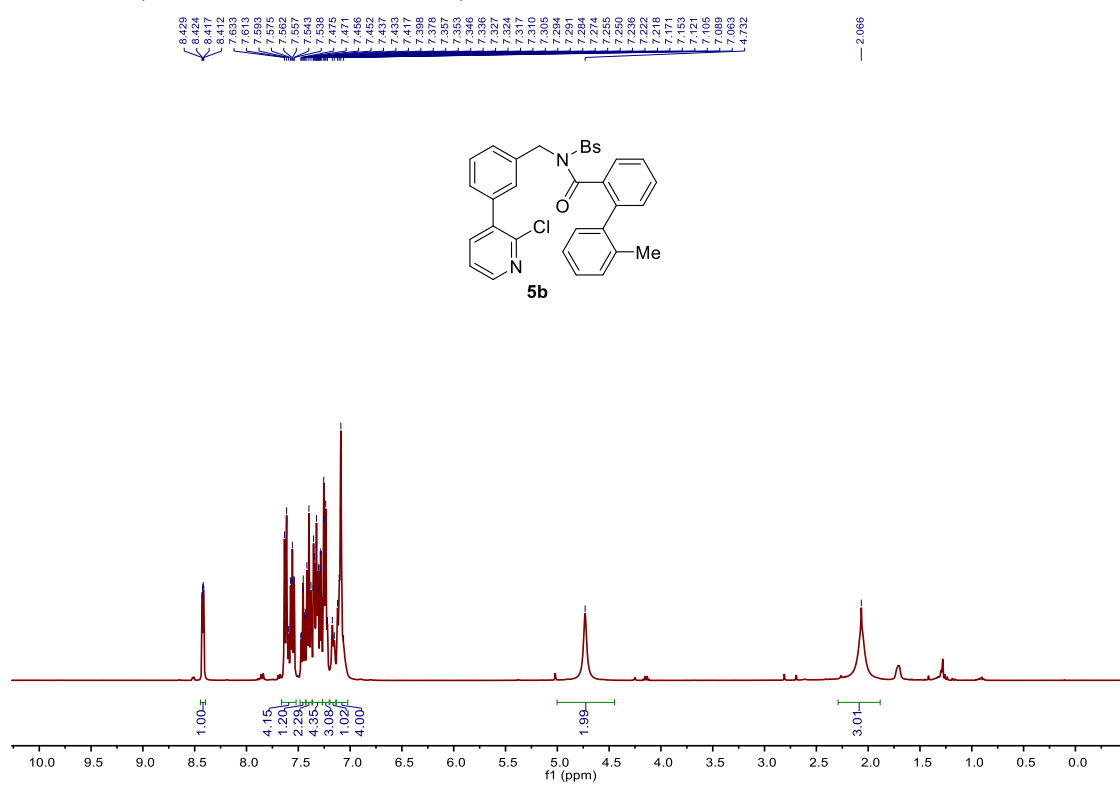

<sup>13</sup>C NMR (101 MHz, Chloroform-*d*)

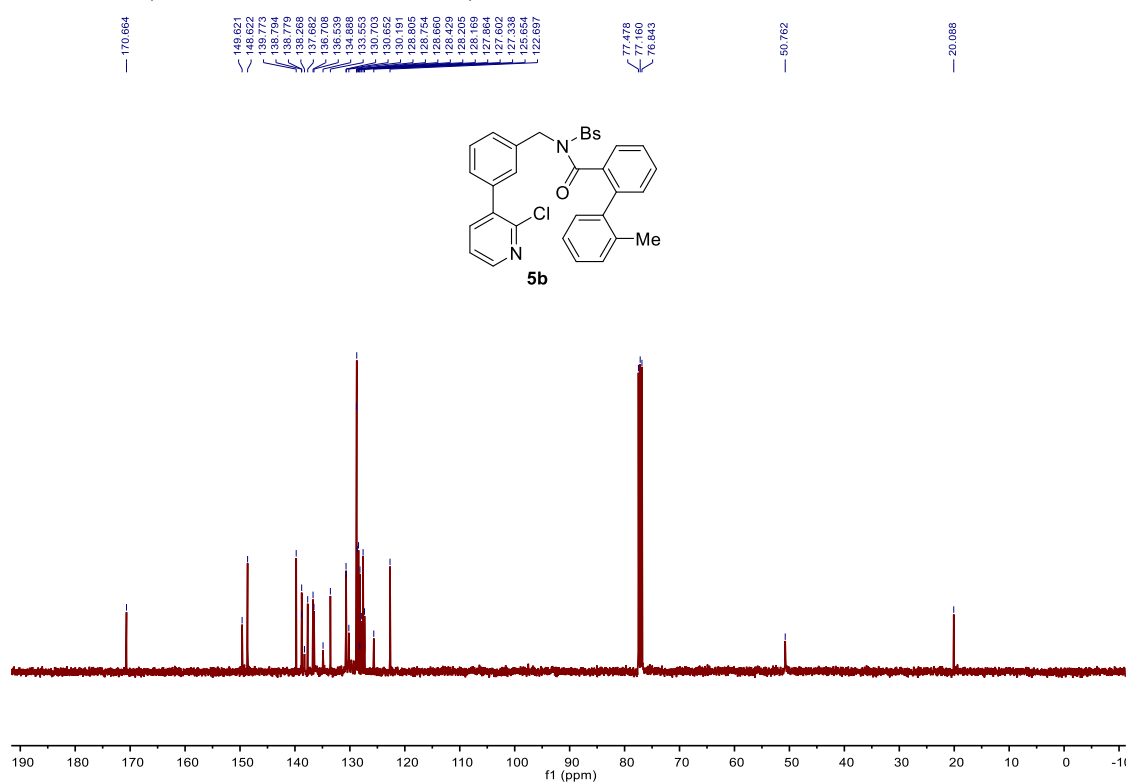

<sup>1</sup>H NMR (400 MHz, Chloroform-*d*)

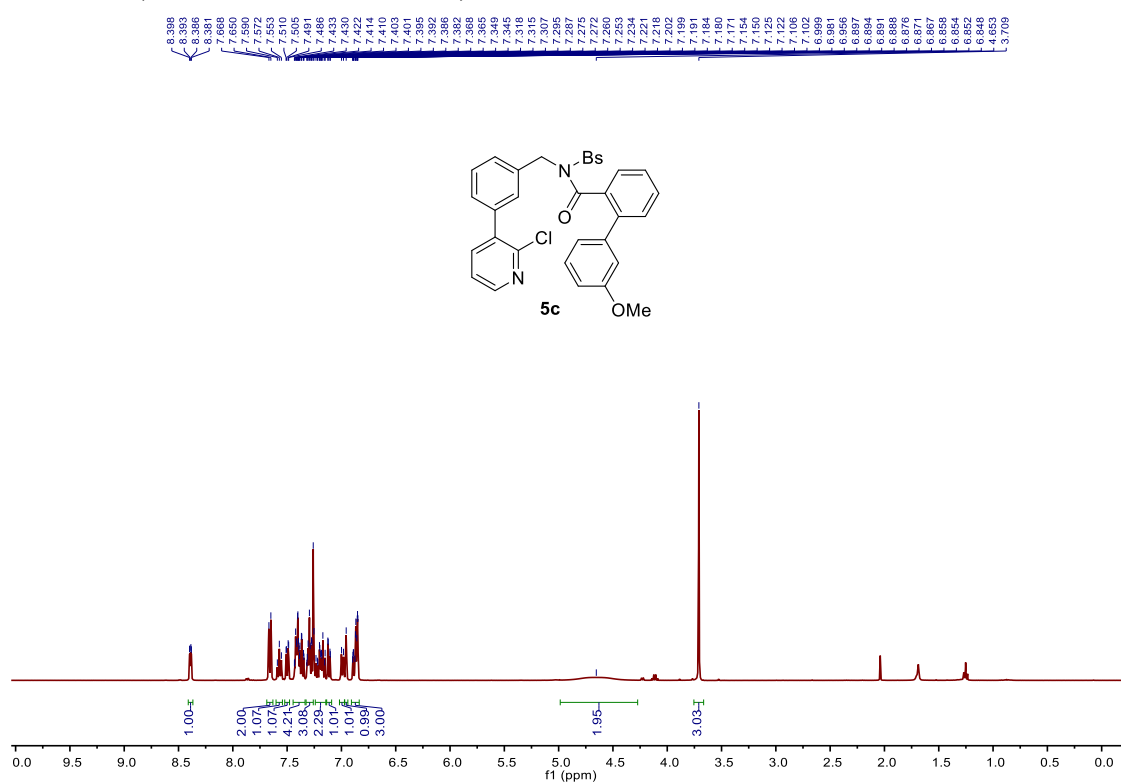

<sup>13</sup>C NMR (101 MHz, Chloroform-*d*)

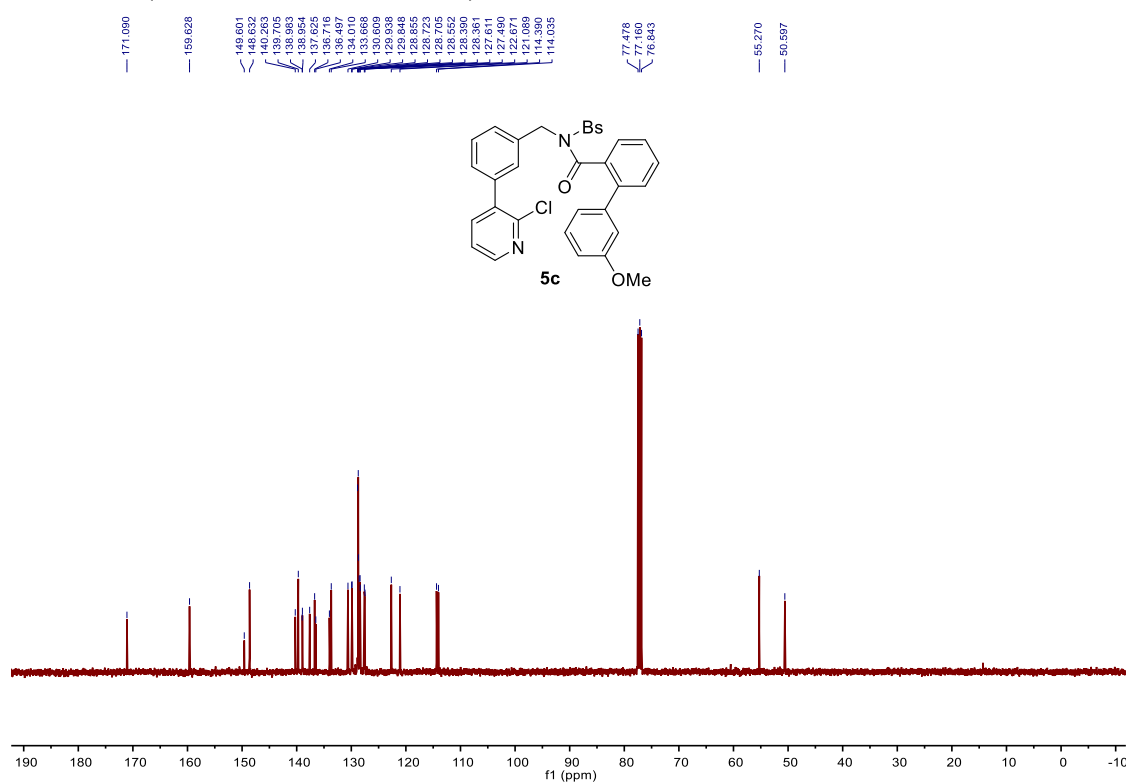

<sup>1</sup>H NMR (400 MHz, Chloroform-*d*)

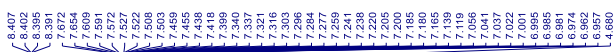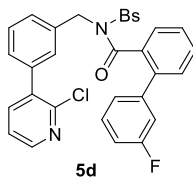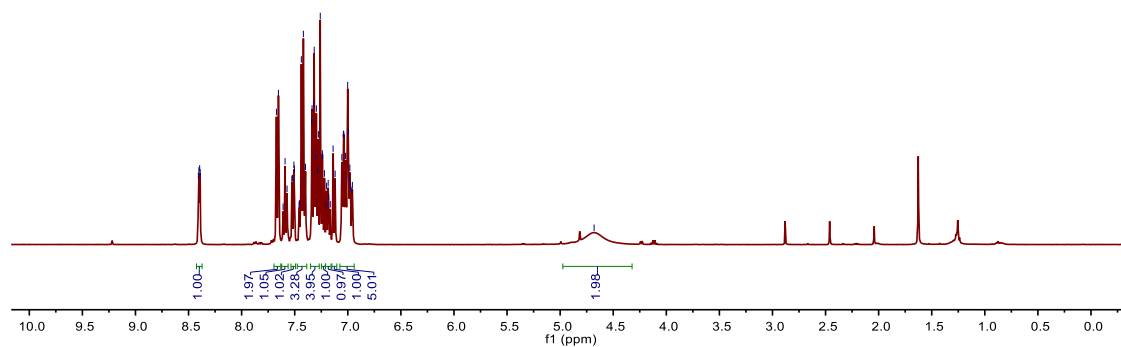

<sup>13</sup>C NMR (101 MHz, Chloroform-*d*)

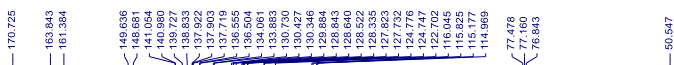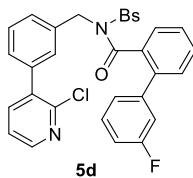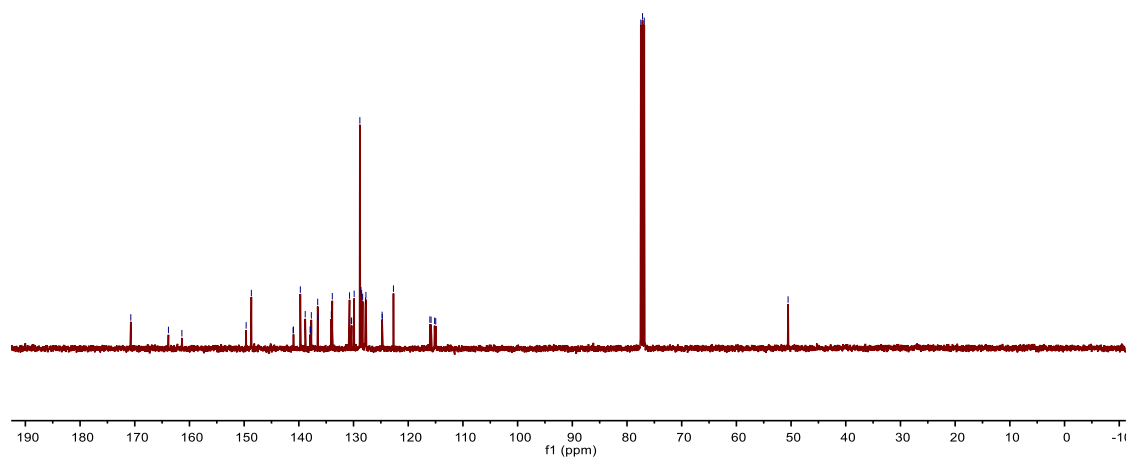



<sup>1</sup>H NMR (400 MHz, Chloroform-*d*)

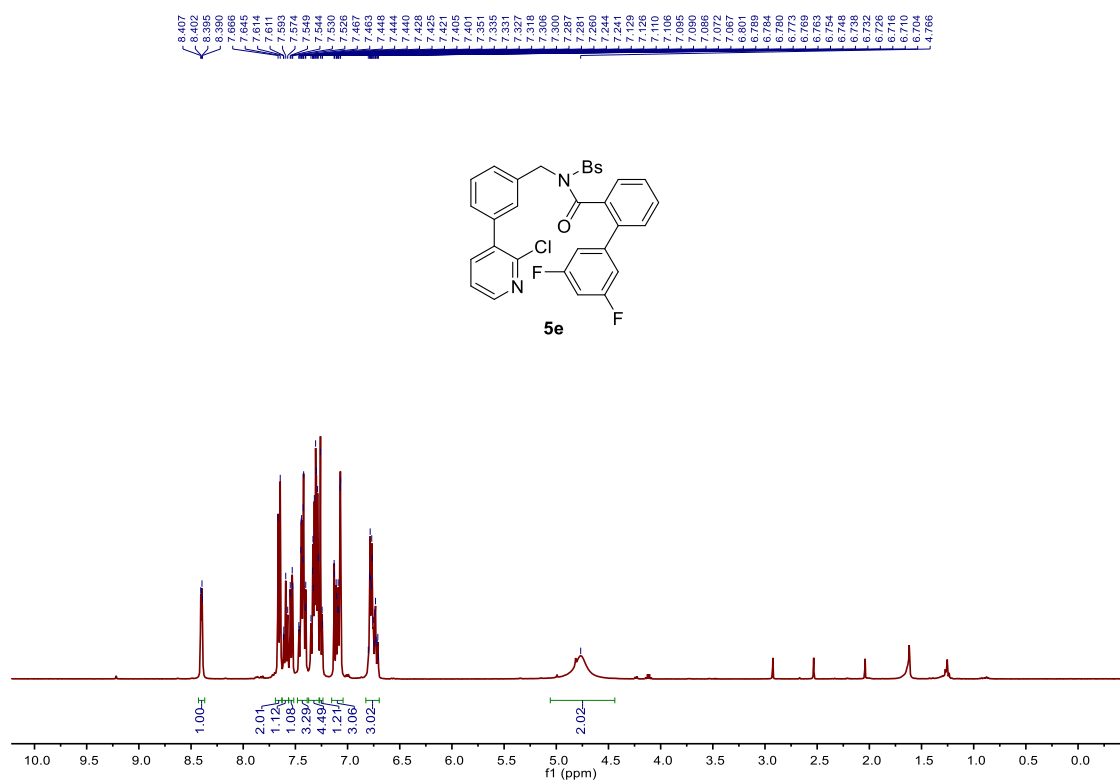

<sup>13</sup>C NMR (101 MHz, Chloroform-*d*)

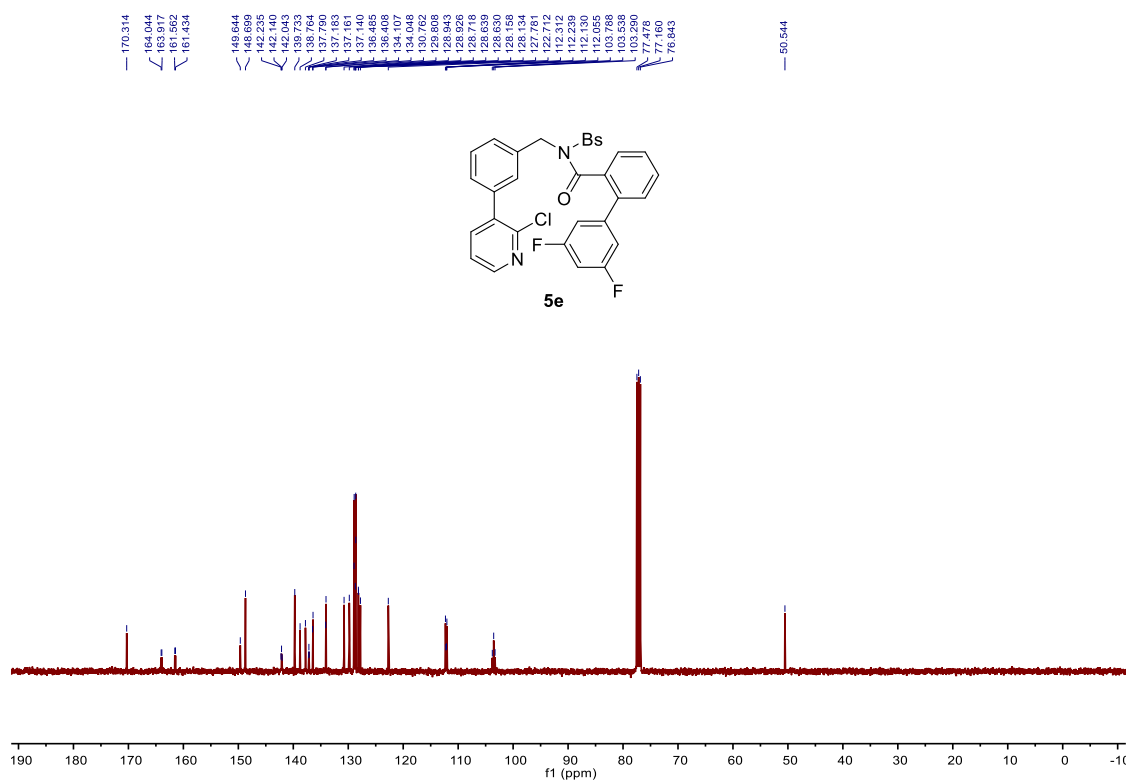

<sup>1</sup>H NMR (400 MHz, Chloroform-*d*)

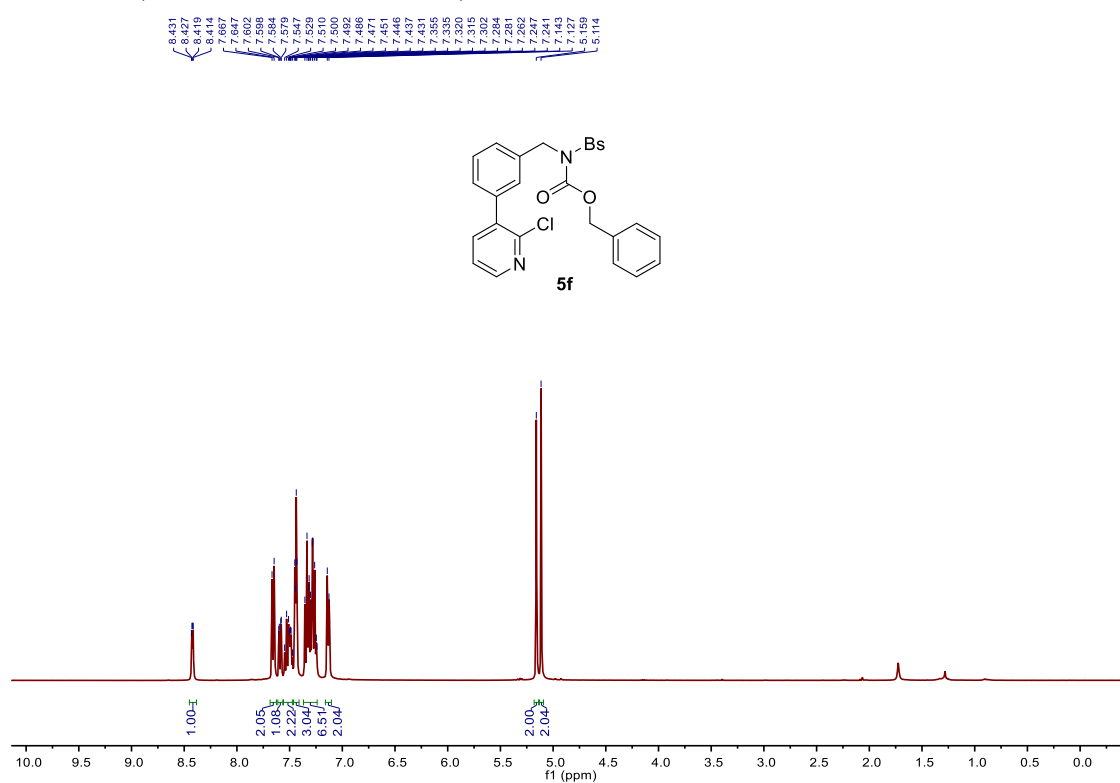

<sup>13</sup>C NMR (101 MHz, Chloroform-*d*)

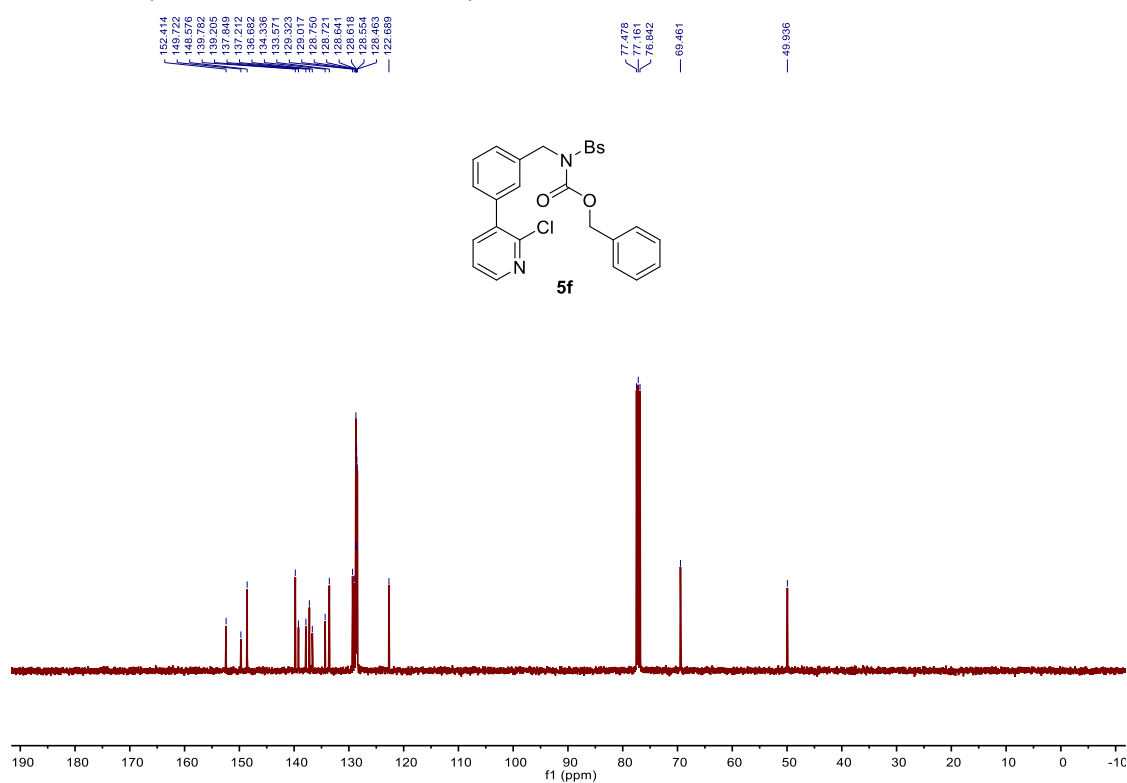

<sup>1</sup>H NMR (400 MHz, Chloroform-*d*)

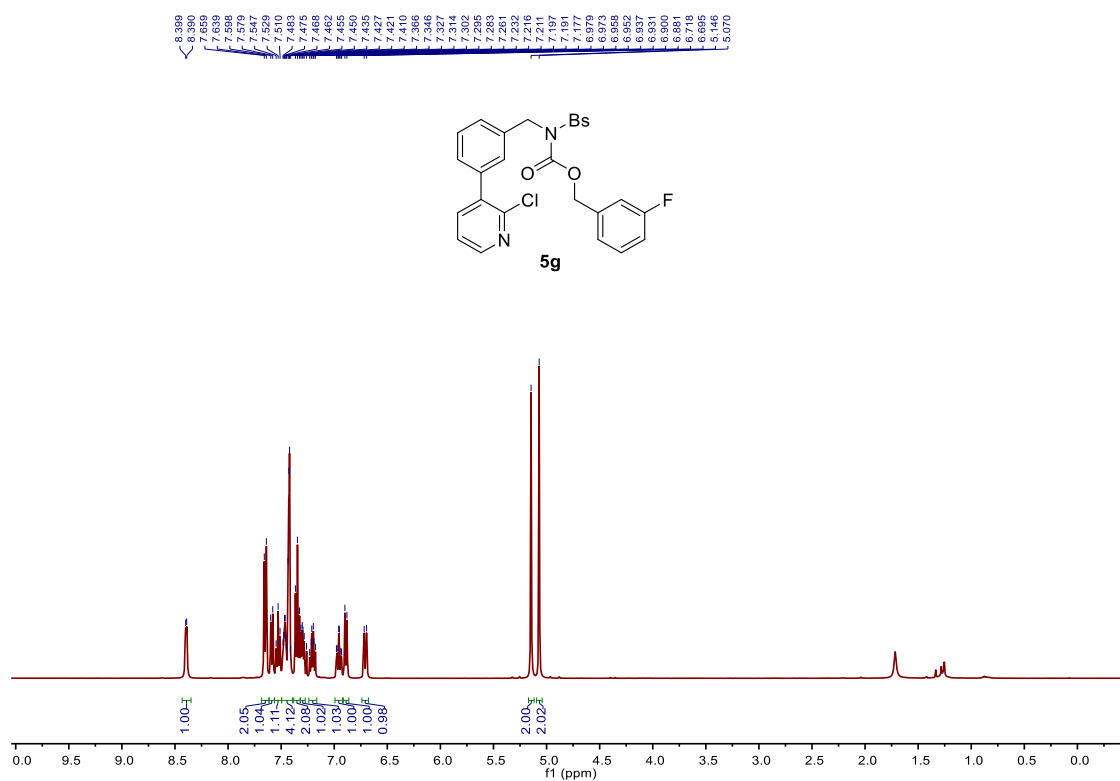

<sup>13</sup>C NMR (101 MHz, Chloroform-*d*)

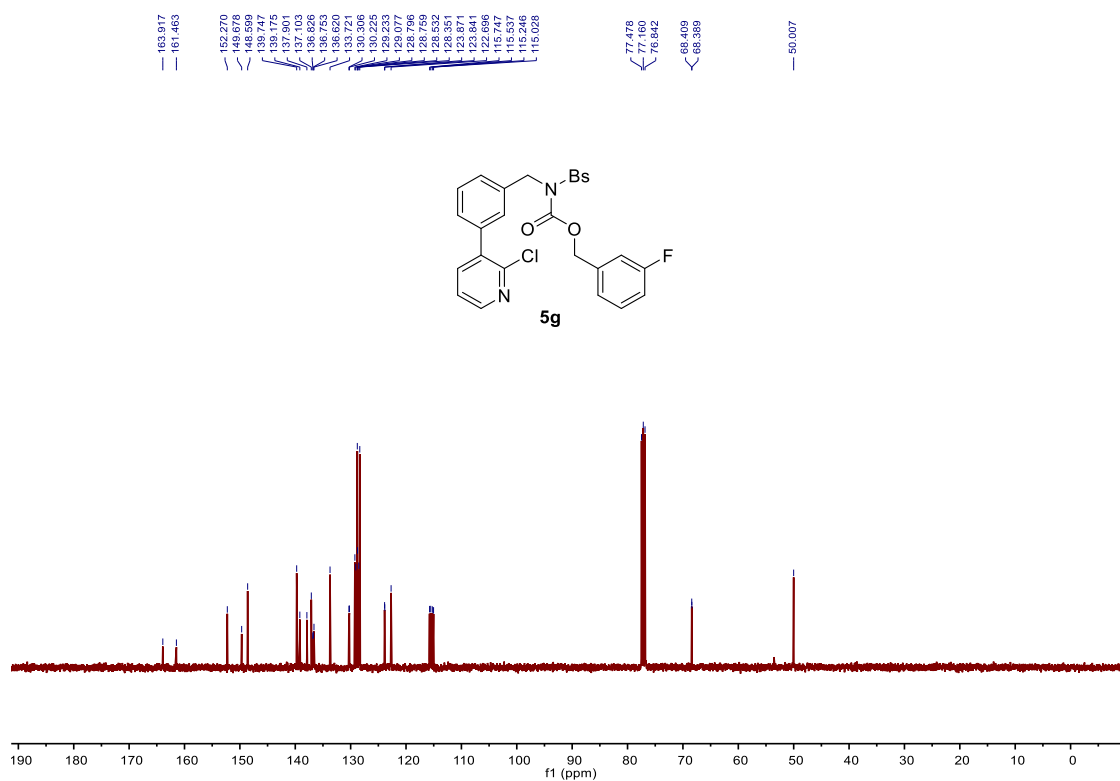

<sup>1</sup>H NMR (400 MHz, Chloroform-*d*)

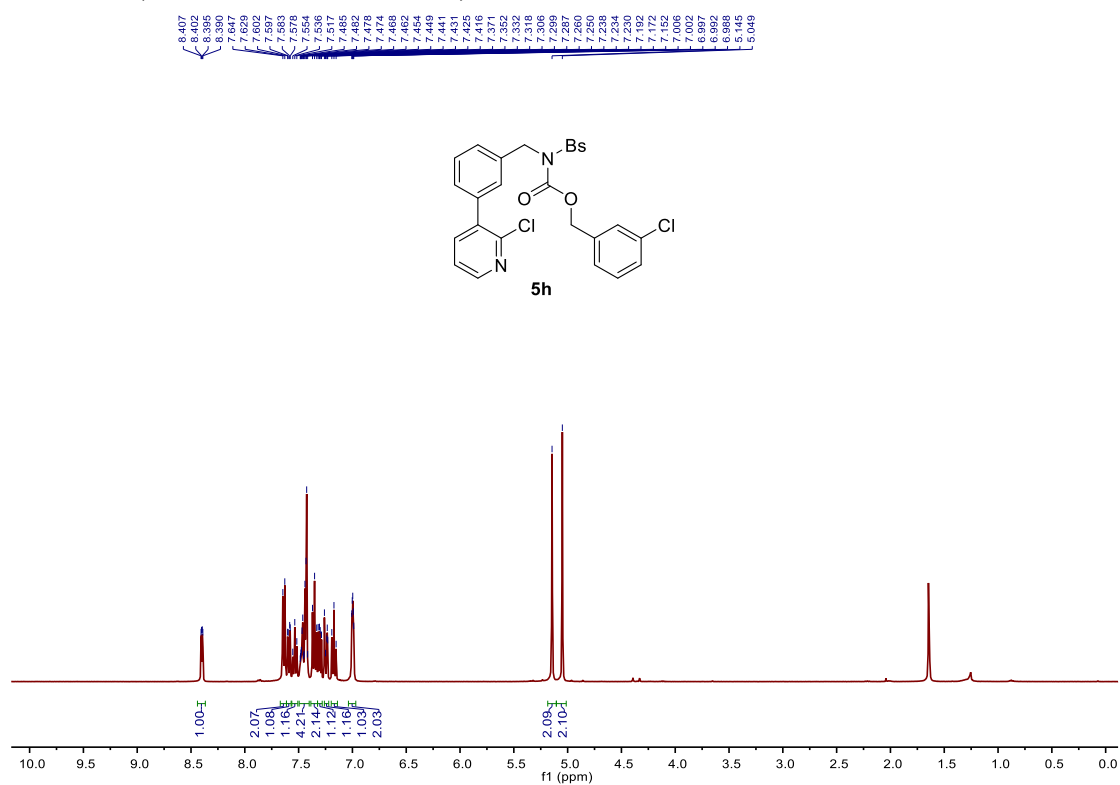

<sup>13</sup>C NMR (101 MHz, Chloroform-*d*)

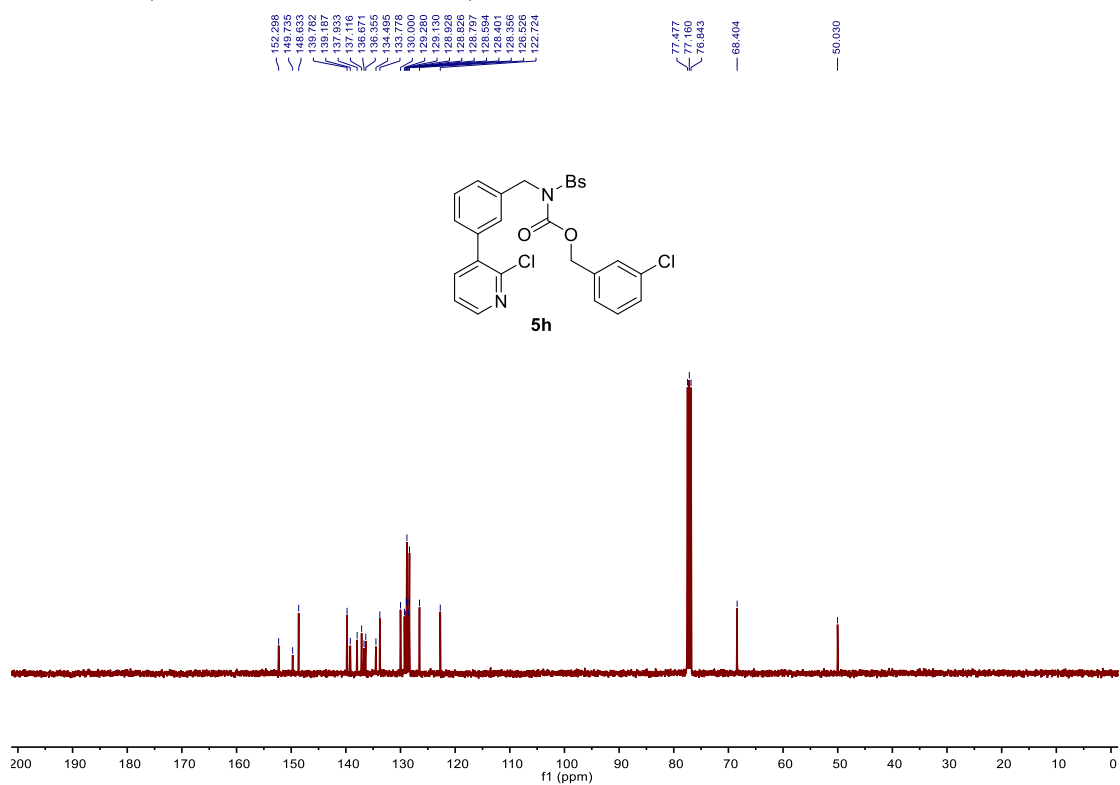

# <sup>1</sup>H NMR (400 MHz, Chloroform-*d*)

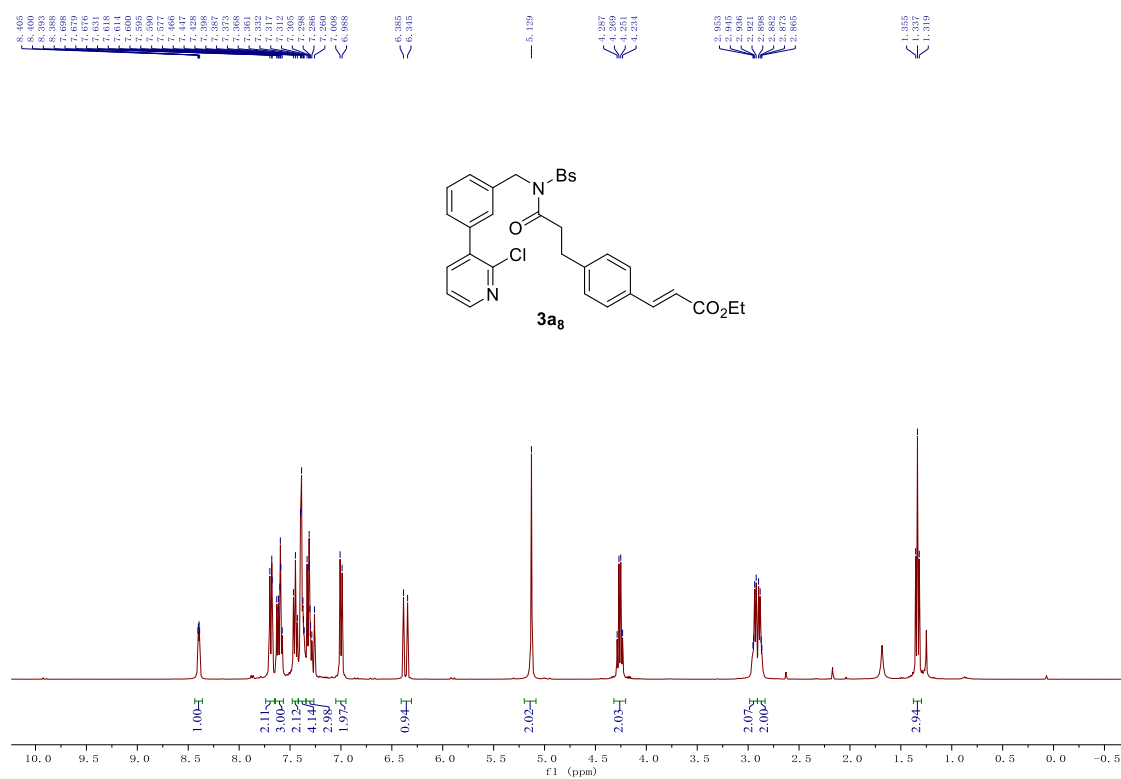

# <sup>13</sup>C NMR (101 MHz, Chloroform-*d*)

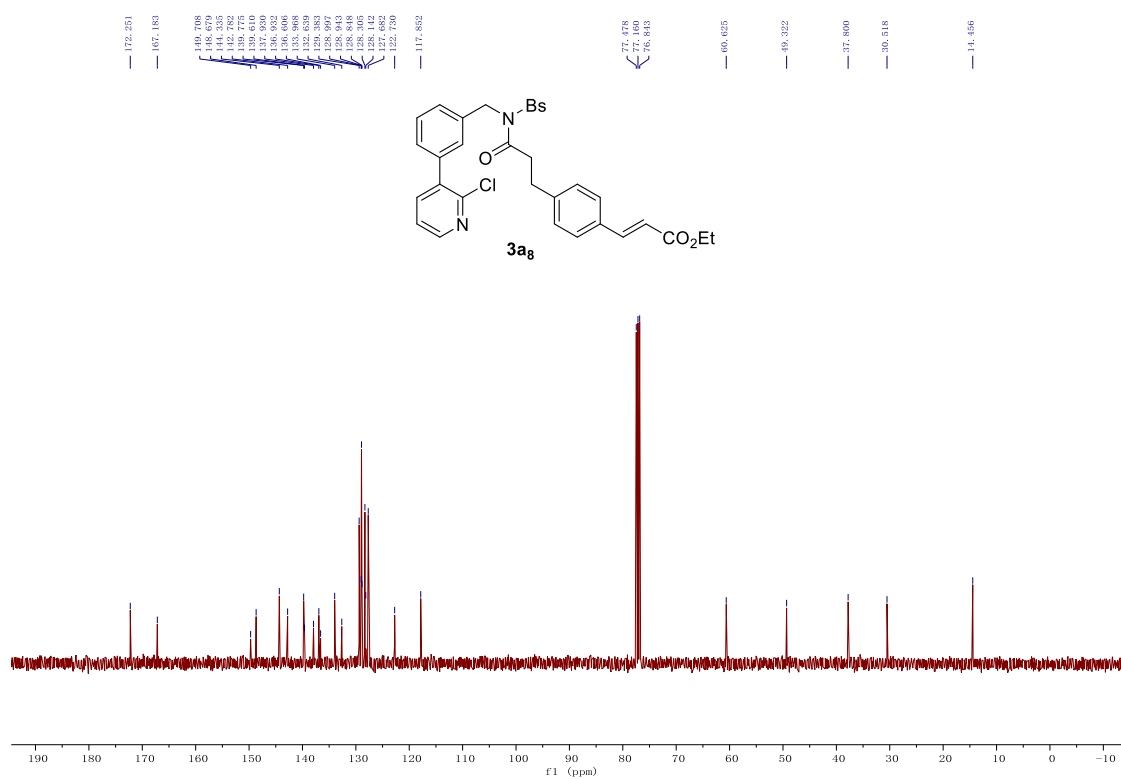

### $^1\text{H}$ NMR (400 MHz, Chloroform-*d*)

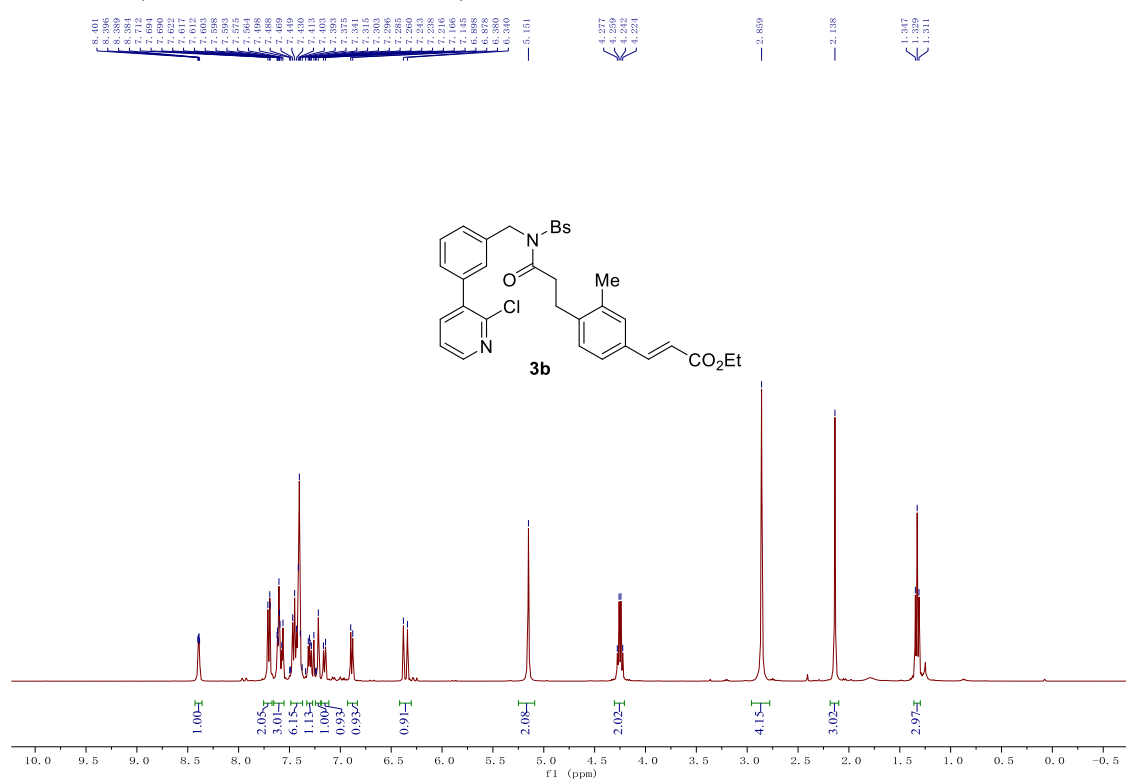

### $^{13}\text{C}$ NMR (101 MHz, Chloroform-*d*)

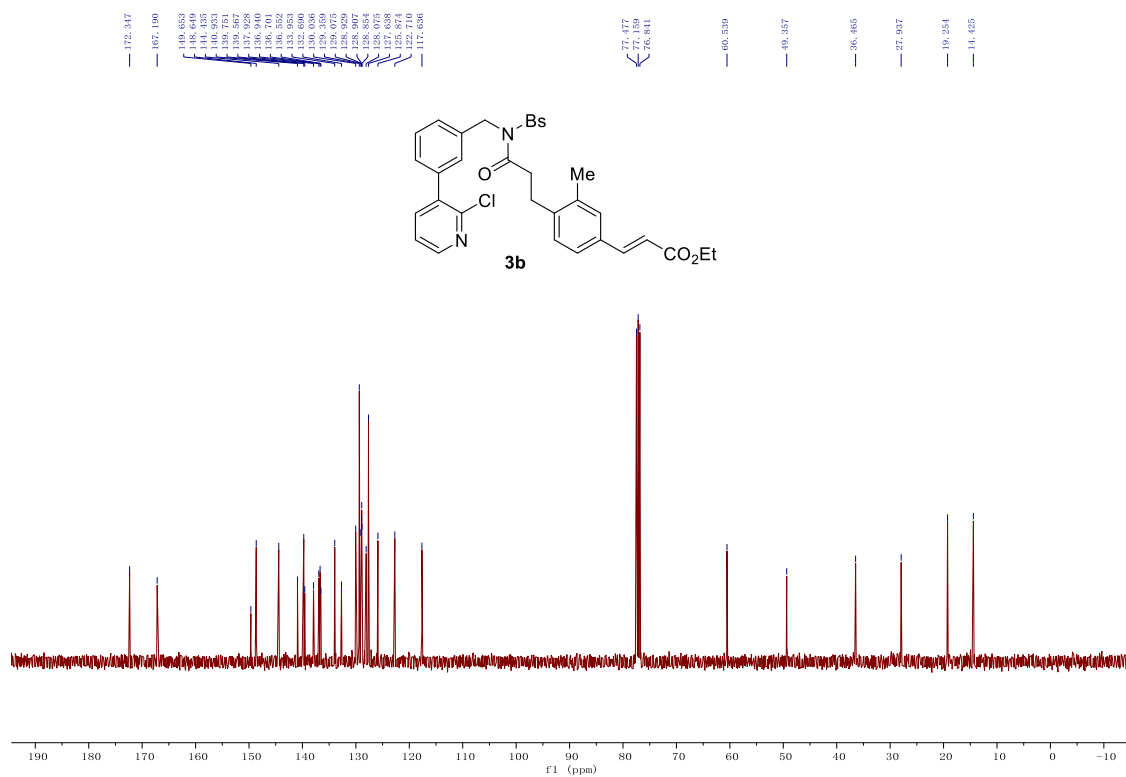

# <sup>1</sup>H NMR (400 MHz, Chloroform-*d*)

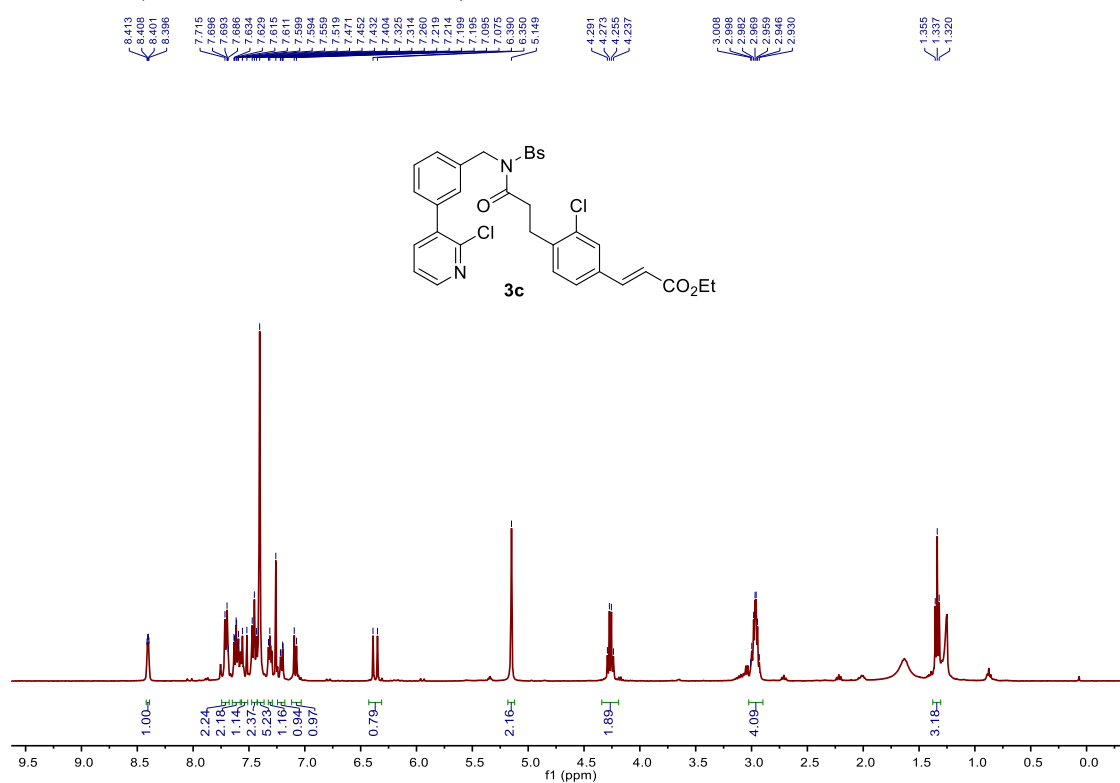

# <sup>13</sup>C NMR (101 MHz, Chloroform-*d*)

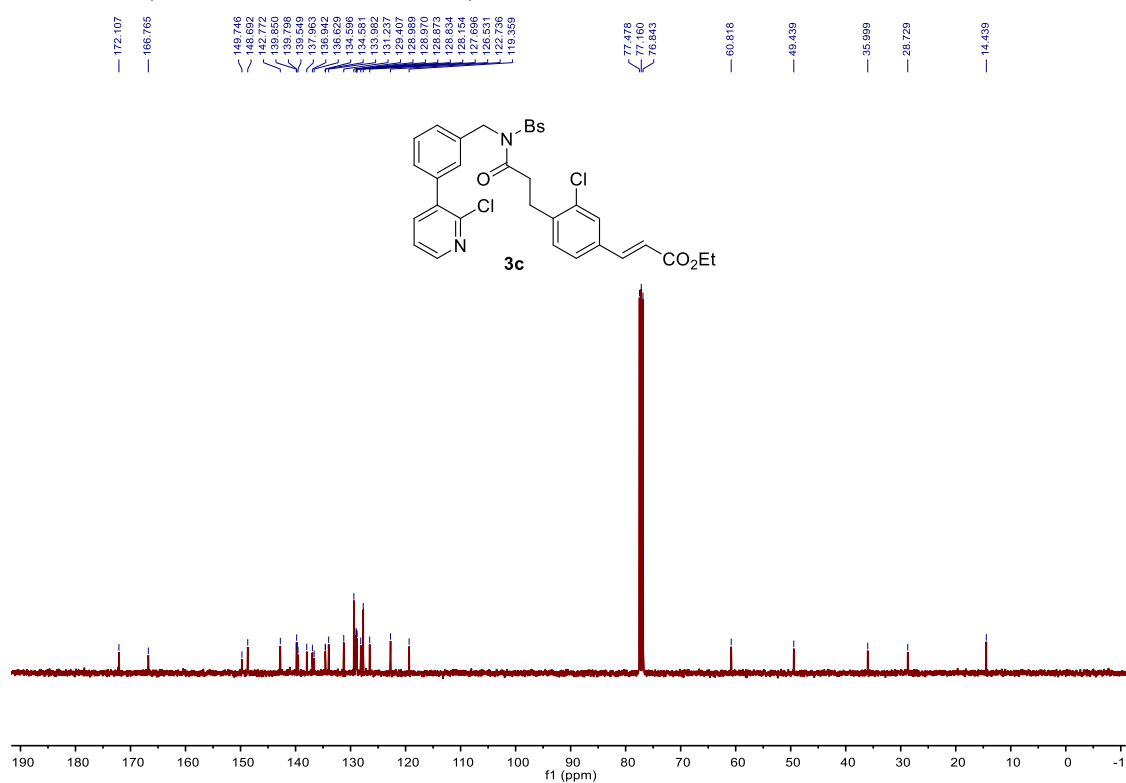

# <sup>1</sup>H NMR (400 MHz, Chloroform-*d*)

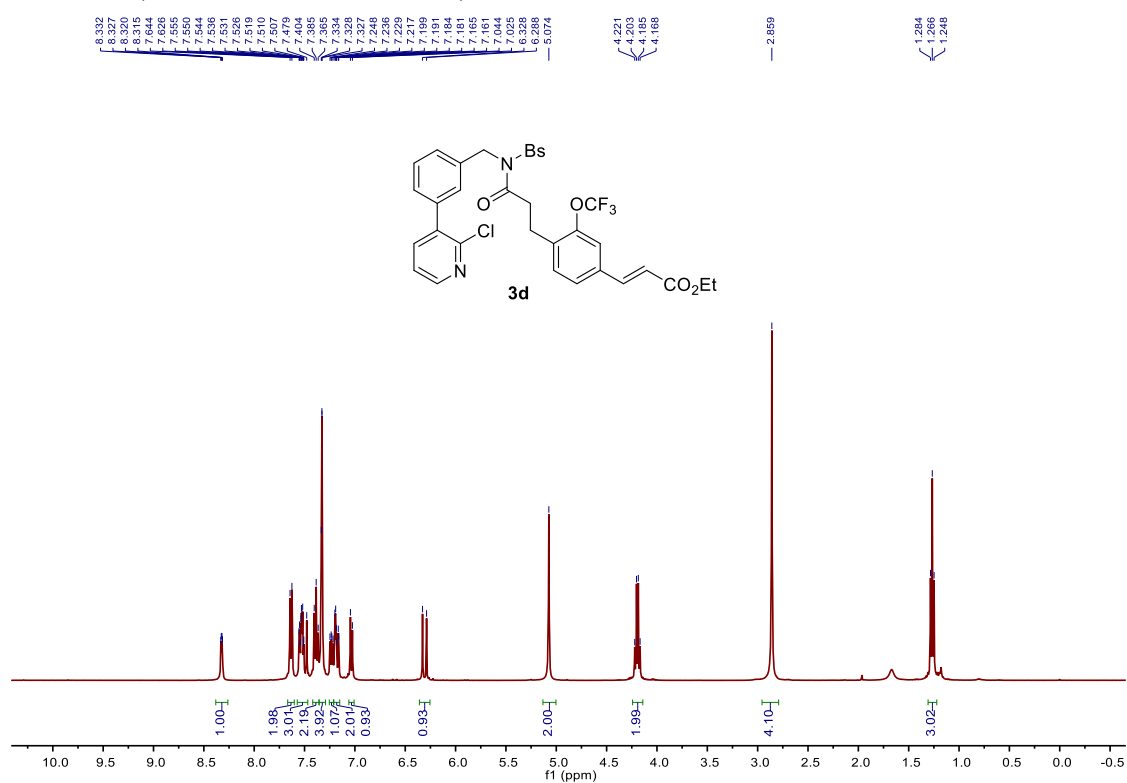

# <sup>13</sup>C NMR (101 MHz, Chloroform-*d*)

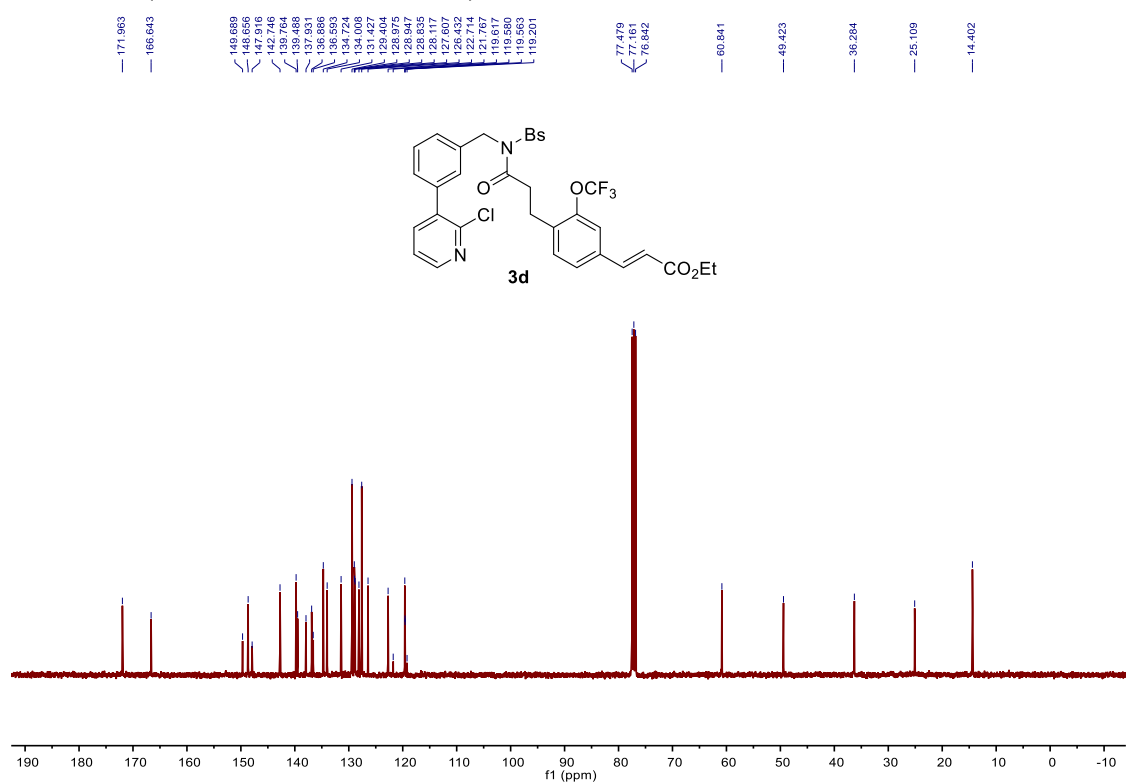



# <sup>1</sup>H NMR (400 MHz, Chloroform-*d*)

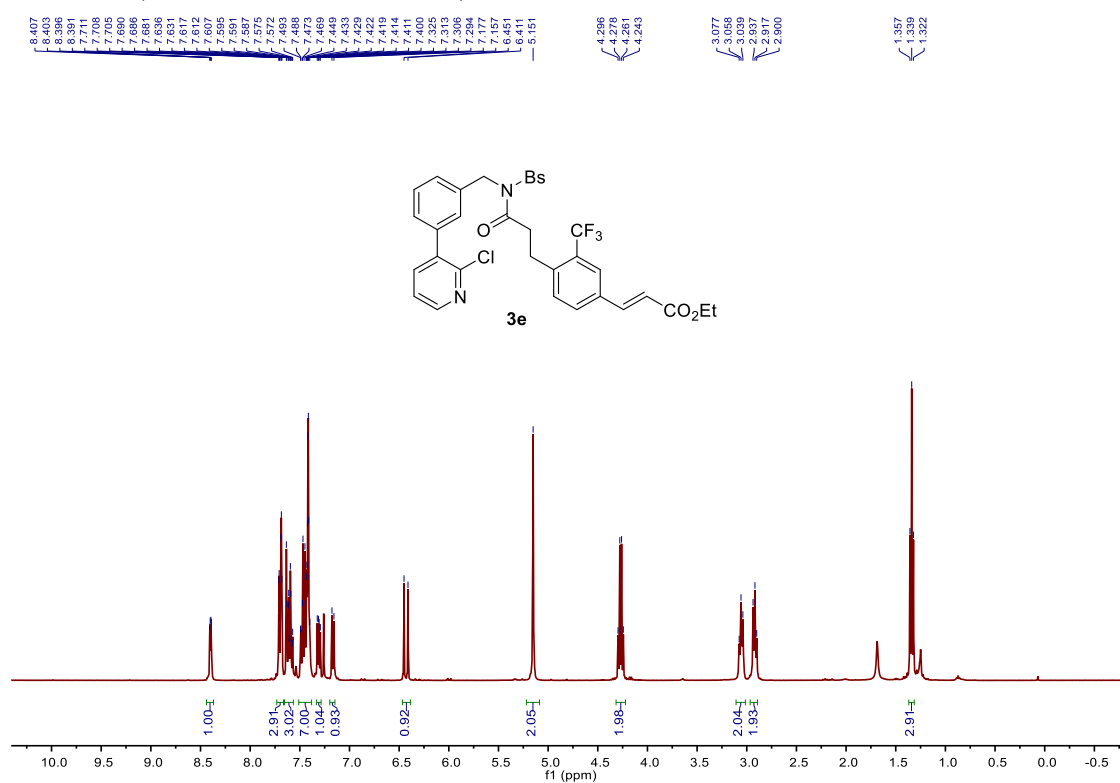

# <sup>13</sup>C NMR (101 MHz, Chloroform-*d*)

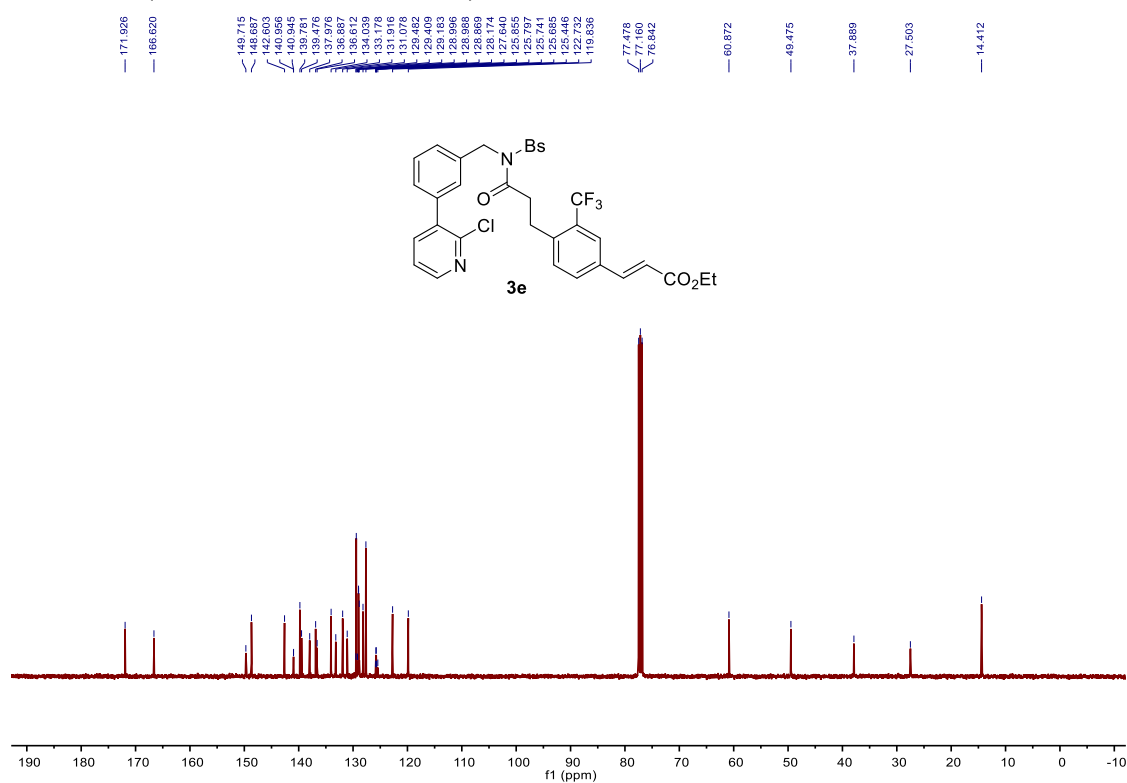

# <sup>1</sup>H NMR (400 MHz, Chloroform-*d*)

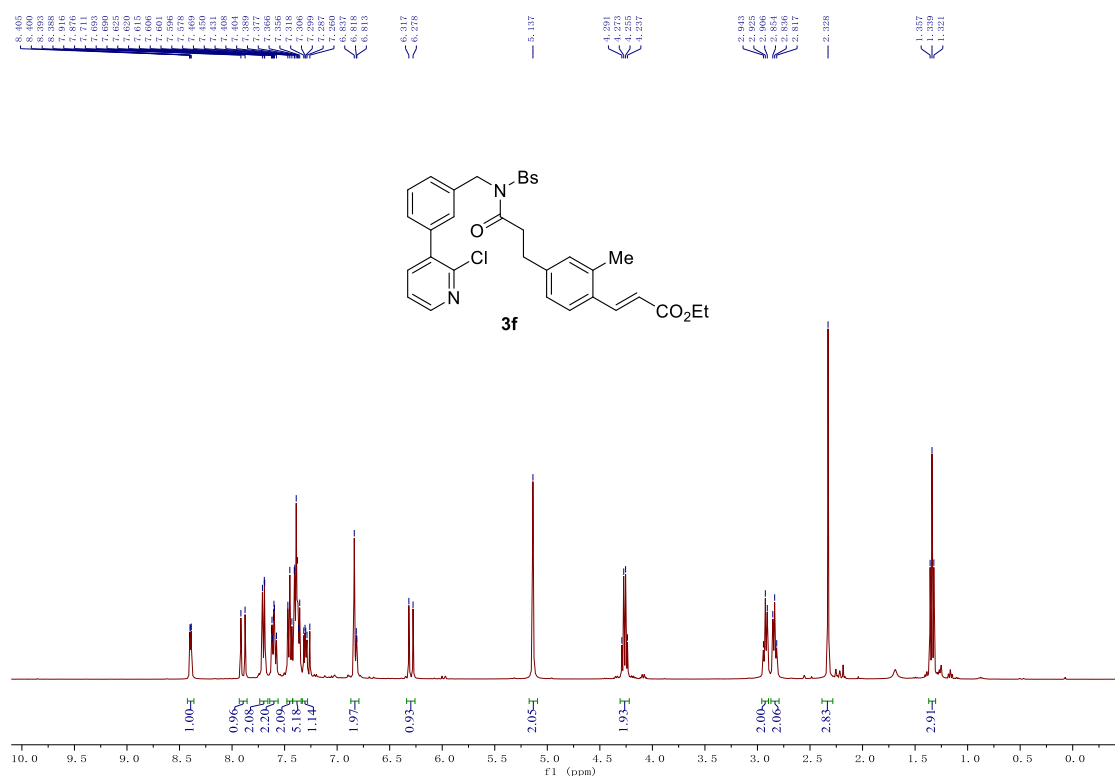

# <sup>13</sup>C NMR (101 MHz, Chloroform-*d*)

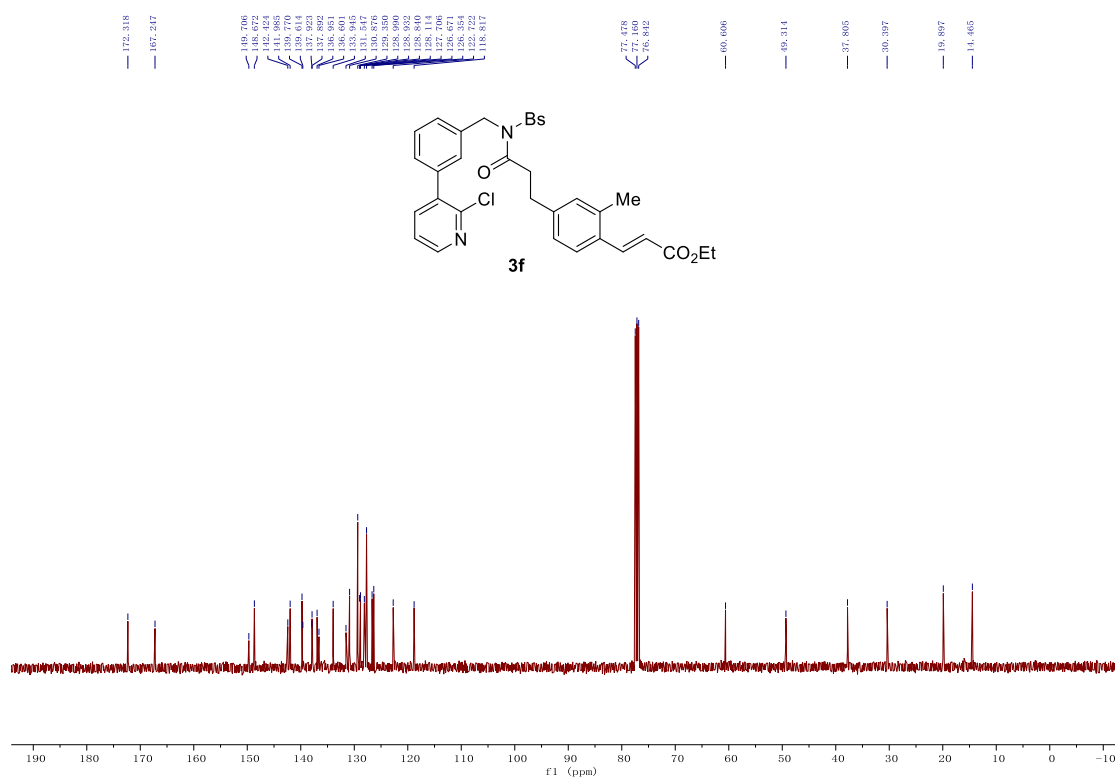

# <sup>1</sup>H NMR (400 MHz, Chloroform-*d*)

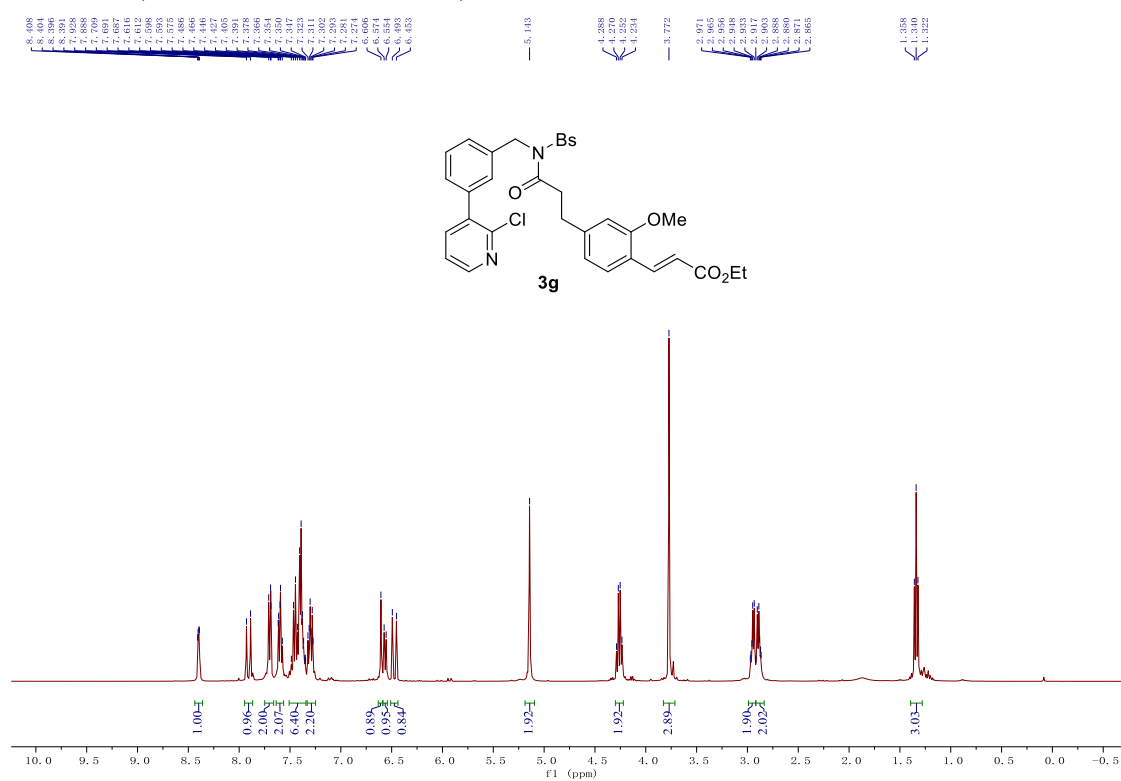

# <sup>13</sup>C NMR (101 MHz, Chloroform-*d*)

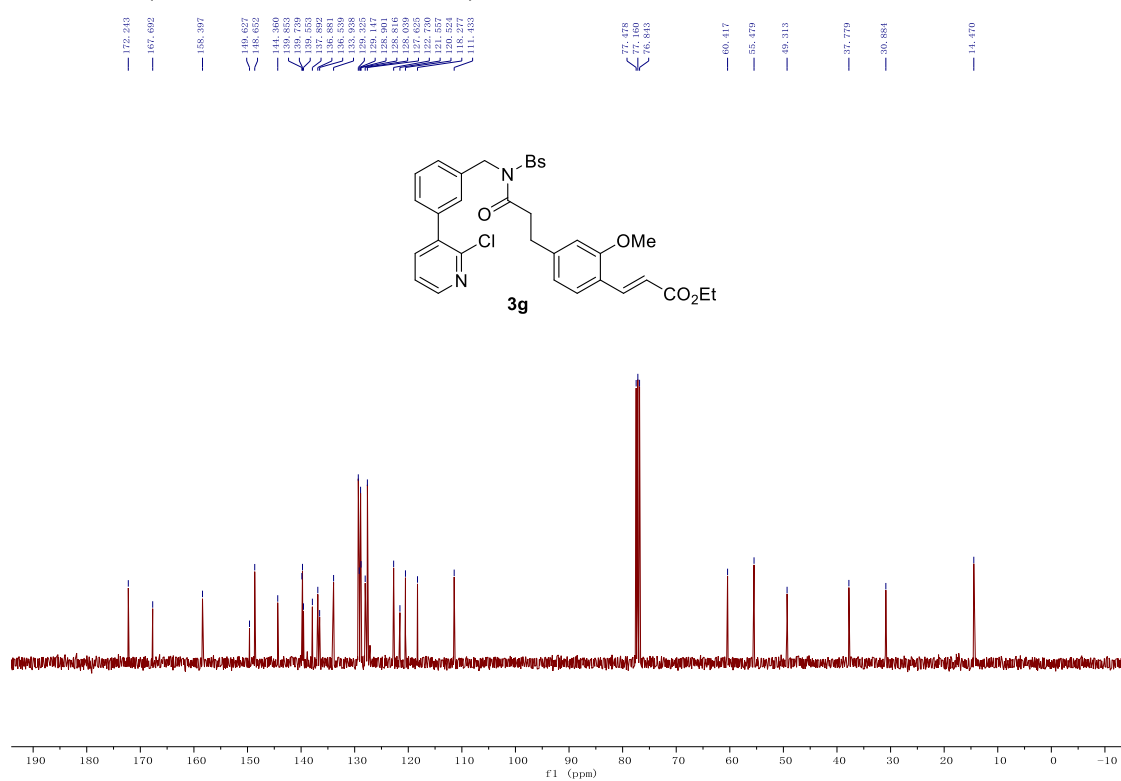

# <sup>1</sup>H NMR (400 MHz, Chloroform-*d*)

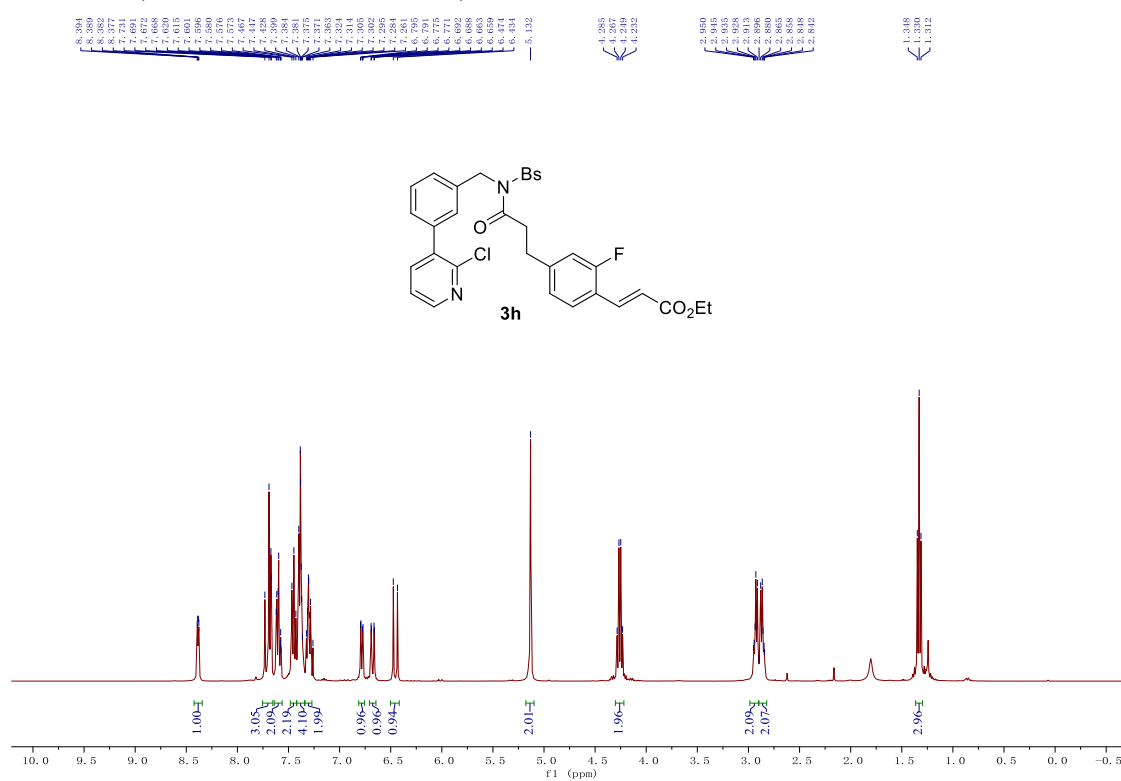

# <sup>13</sup>C NMR (101 MHz, Chloroform-*d*)

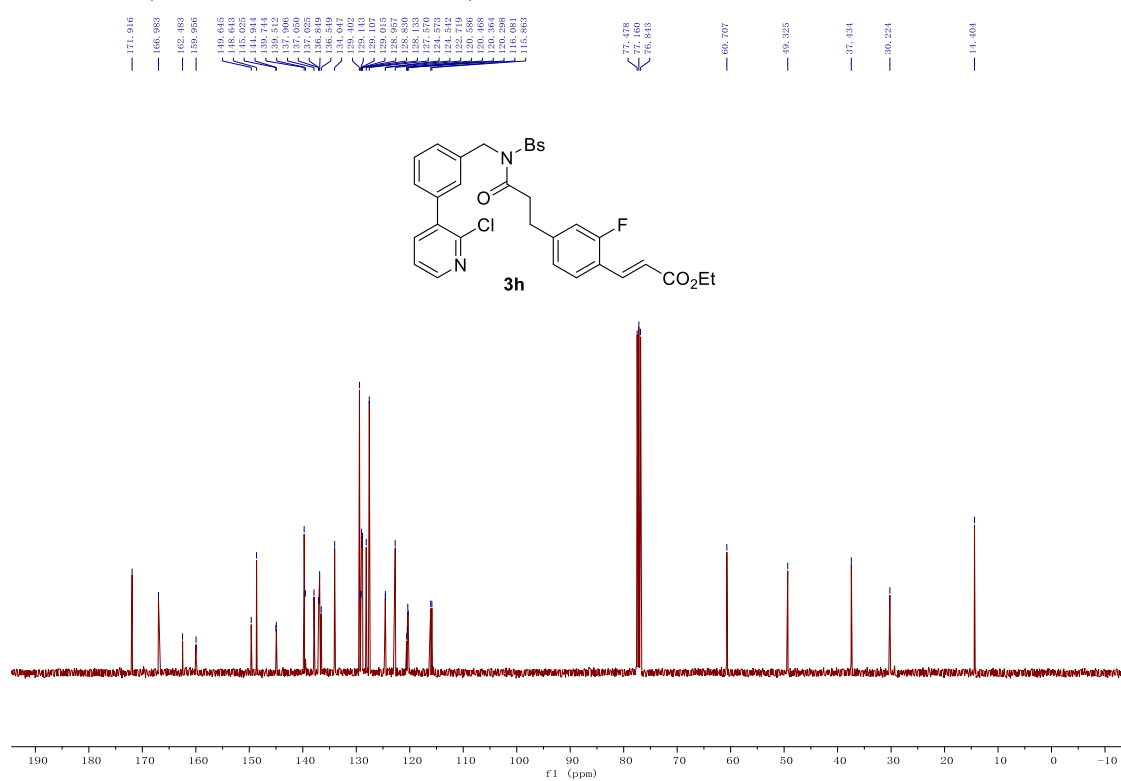



<sup>1</sup>H NMR (400 MHz, Chloroform-*d*)

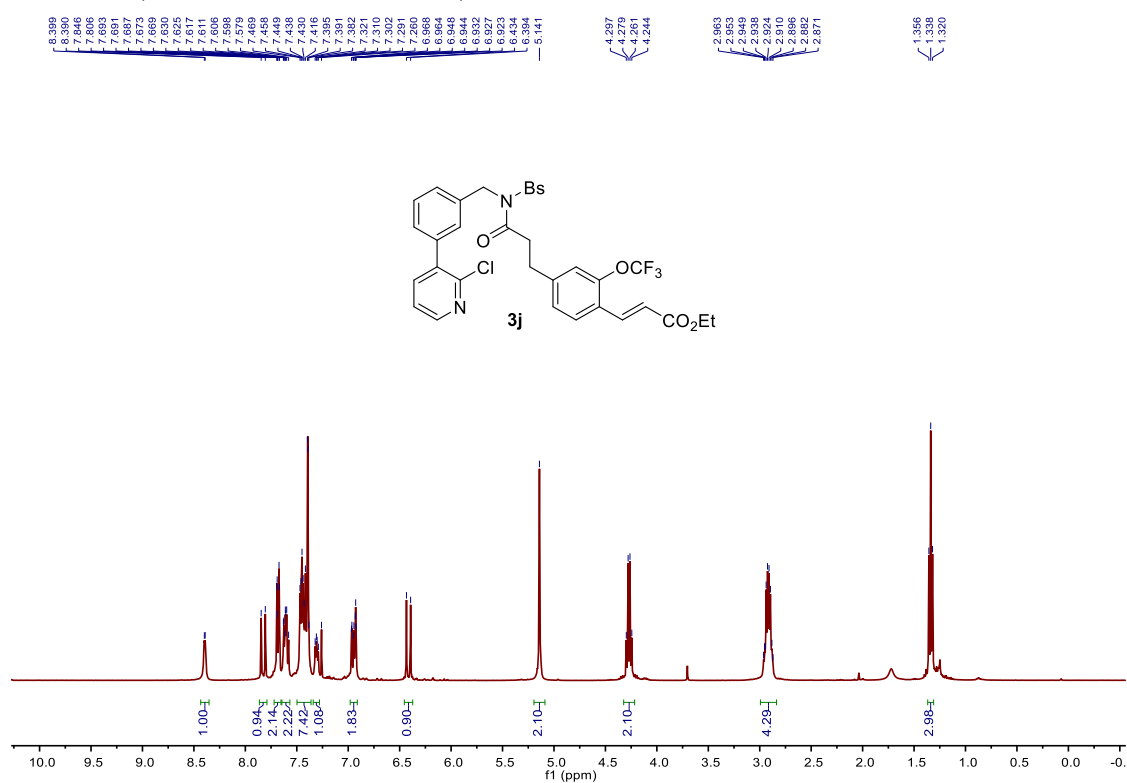

<sup>13</sup>C NMR (101 MHz, Chloroform-*d*)

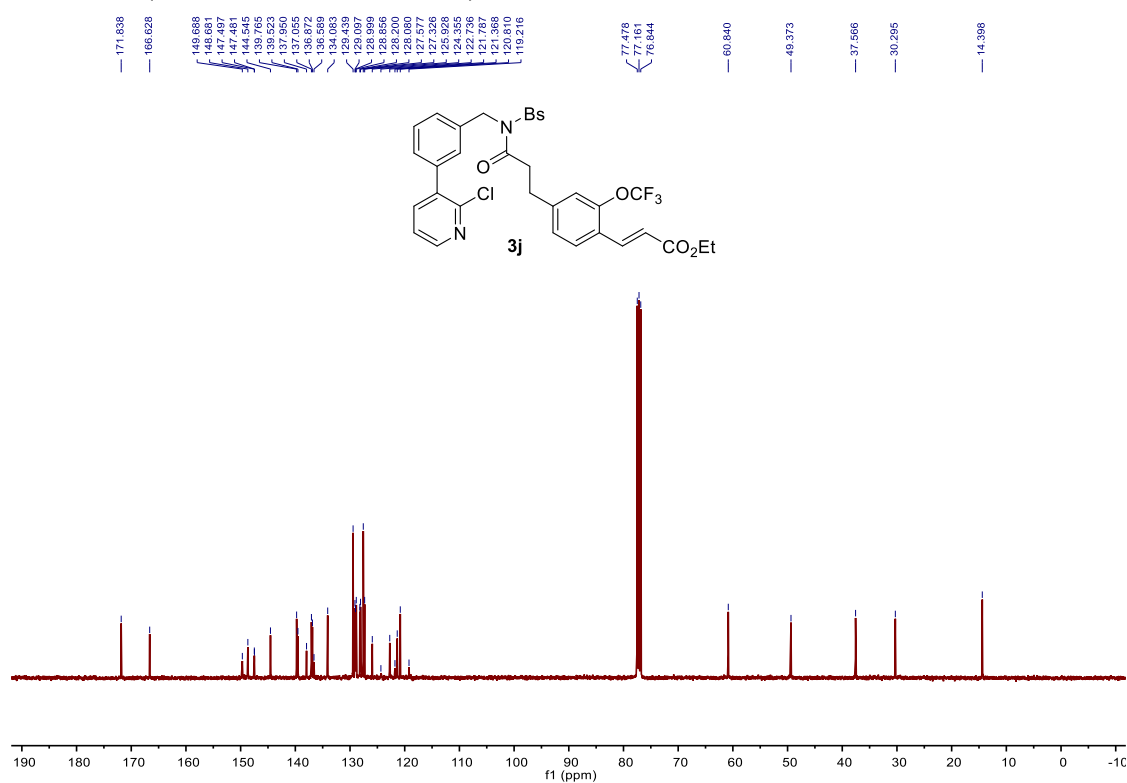

# <sup>1</sup>H NMR (400 MHz, Chloroform-*d*)

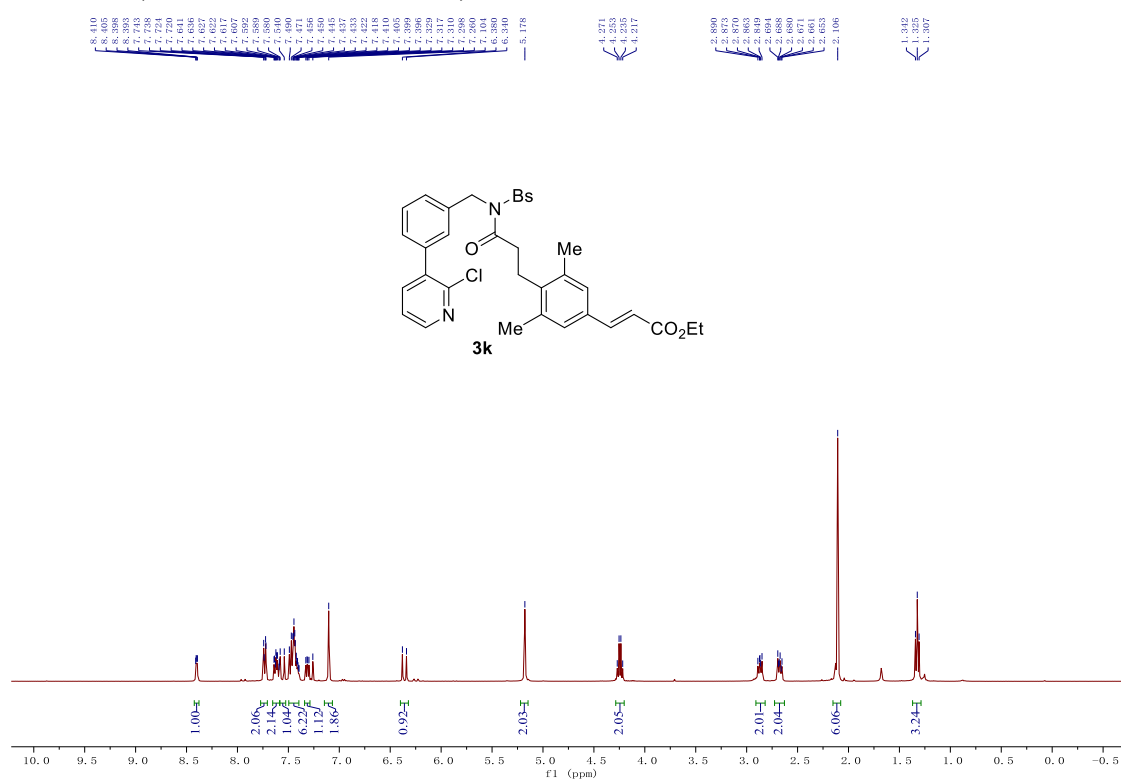

# <sup>13</sup>C NMR (101 MHz, Chloroform-*d*)

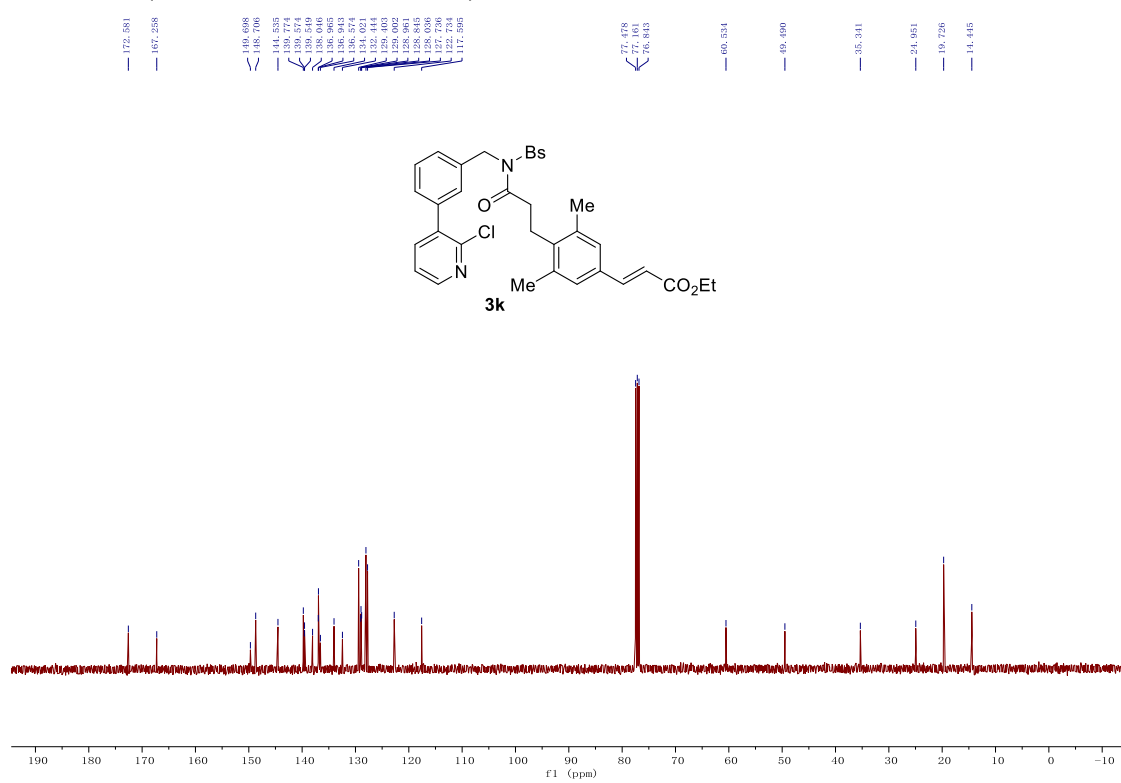

# <sup>1</sup>H NMR (400 MHz, Chloroform-*d*)

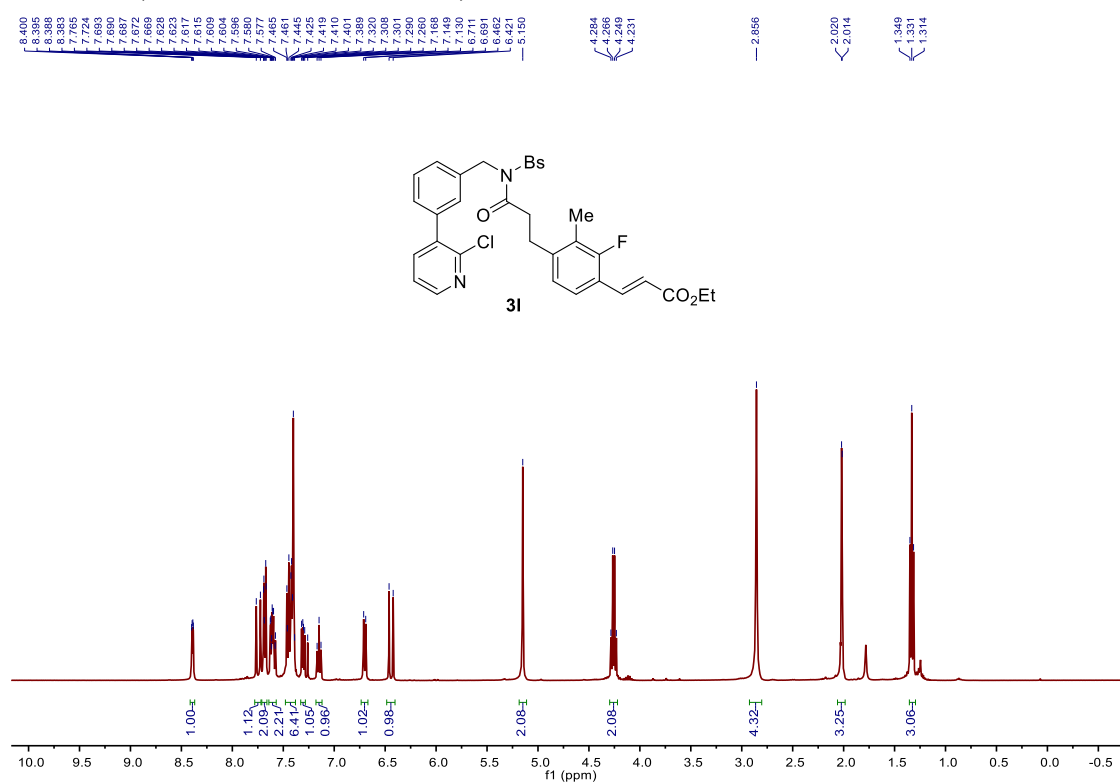

# <sup>13</sup>C NMR (101 MHz, Chloroform-*d*)

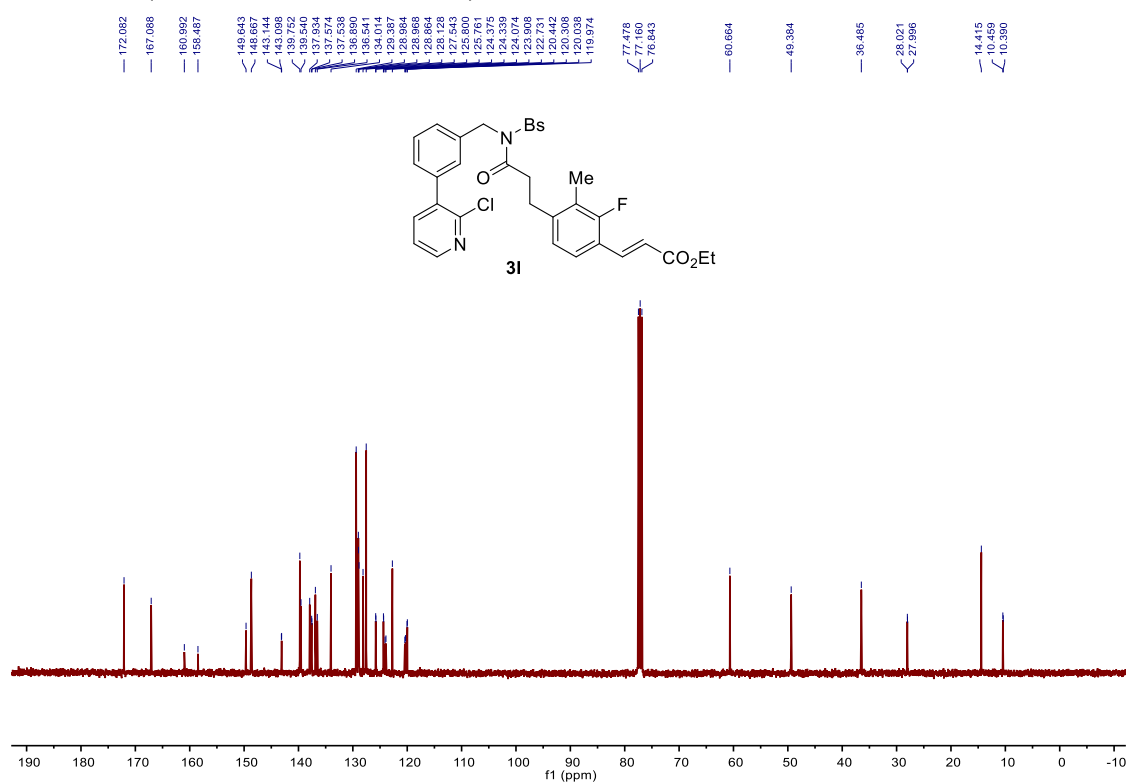



# <sup>1</sup>H NMR (400 MHz, Chloroform-*d*)

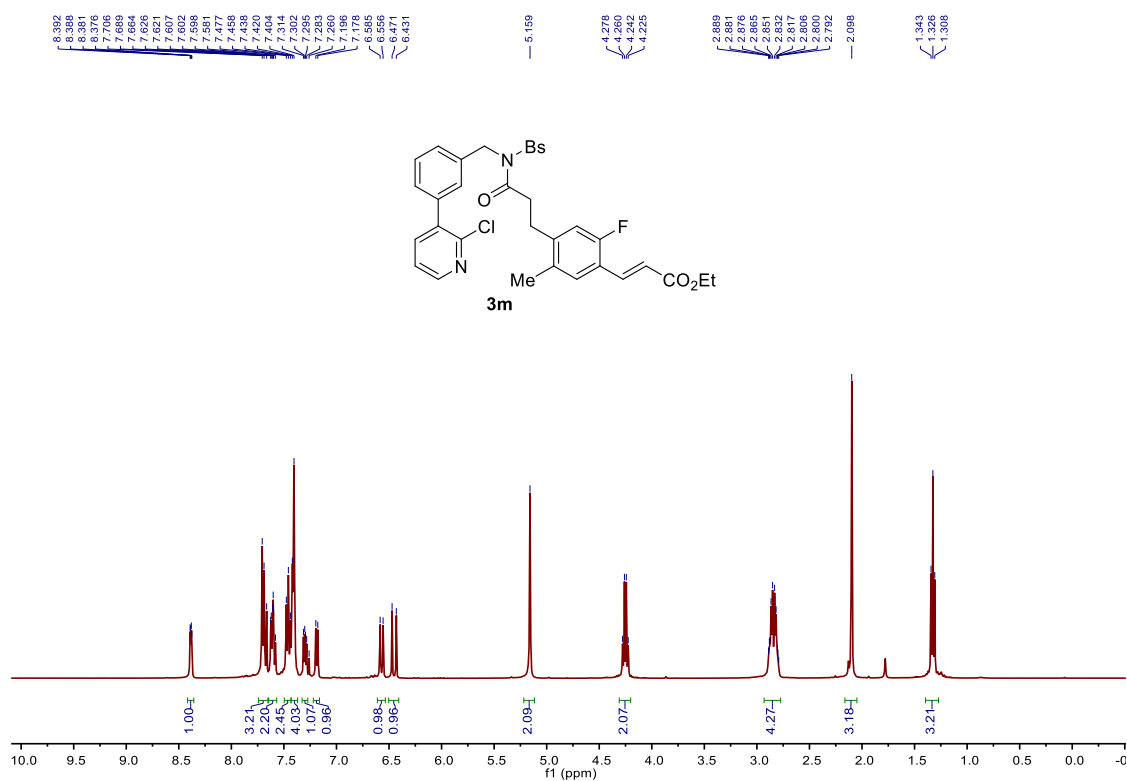

# <sup>13</sup>C NMR (101 MHz, Chloroform-*d*)

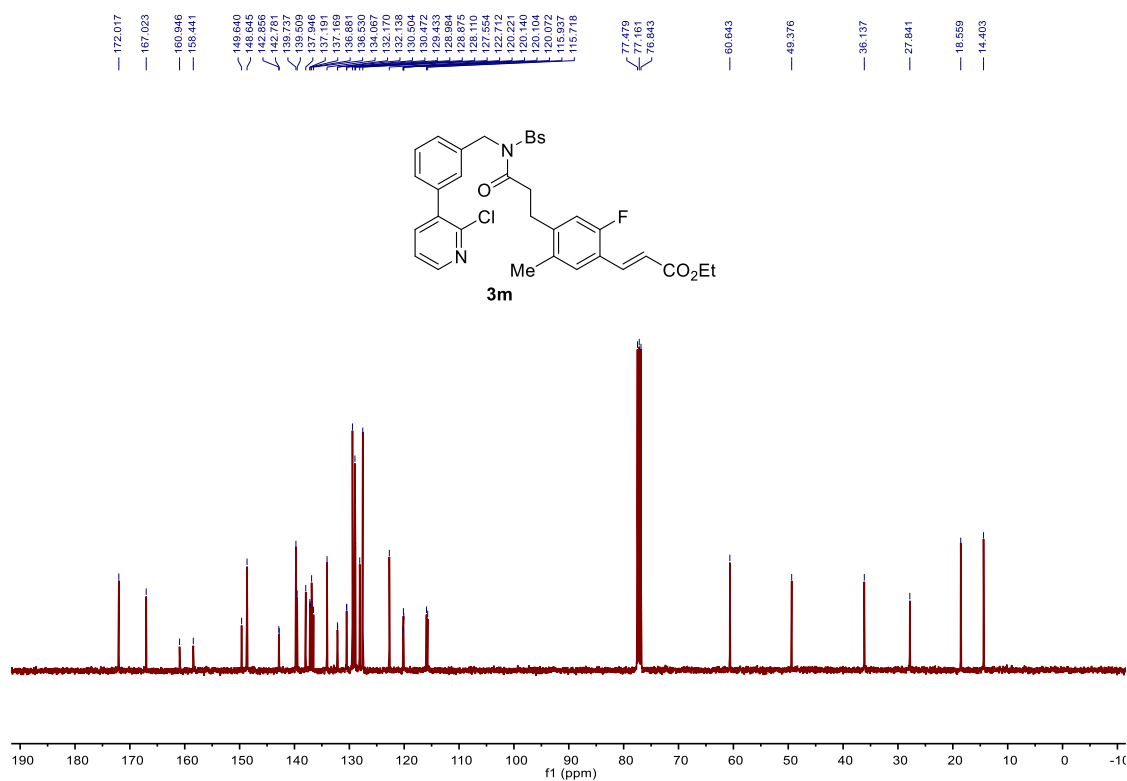

<sup>1</sup>H NMR (400 MHz, Chloroform-*d*)

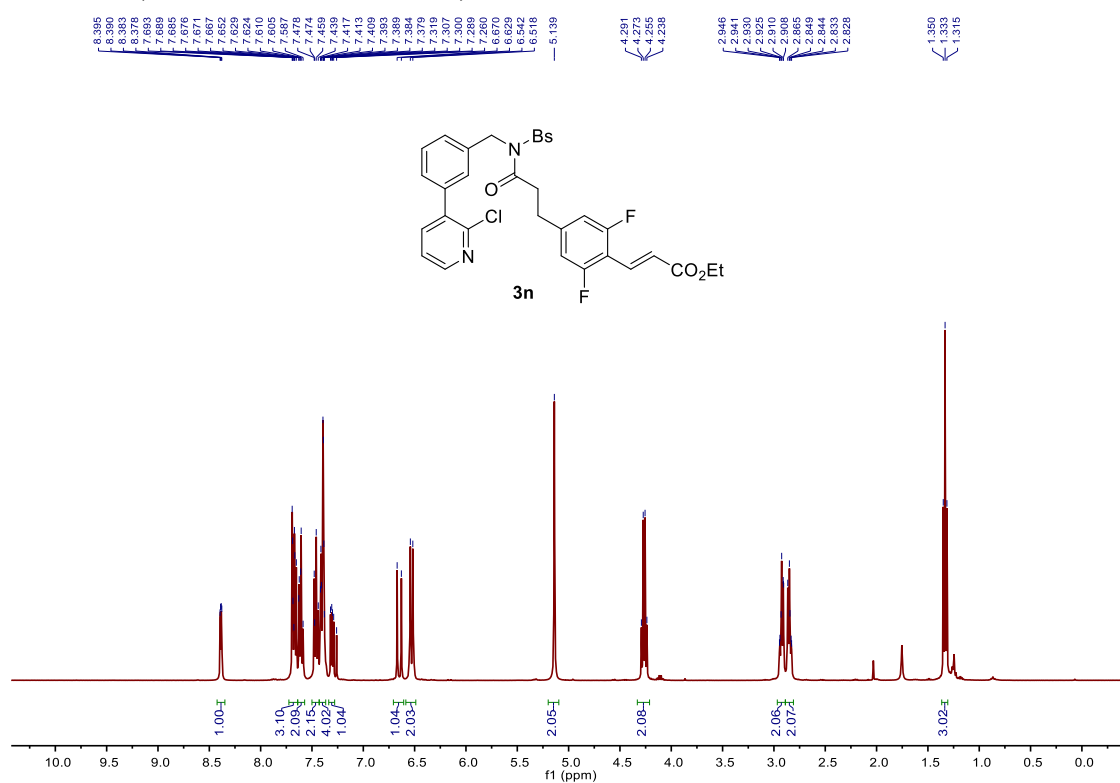

<sup>13</sup>C NMR (101 MHz, Chloroform-*d*)

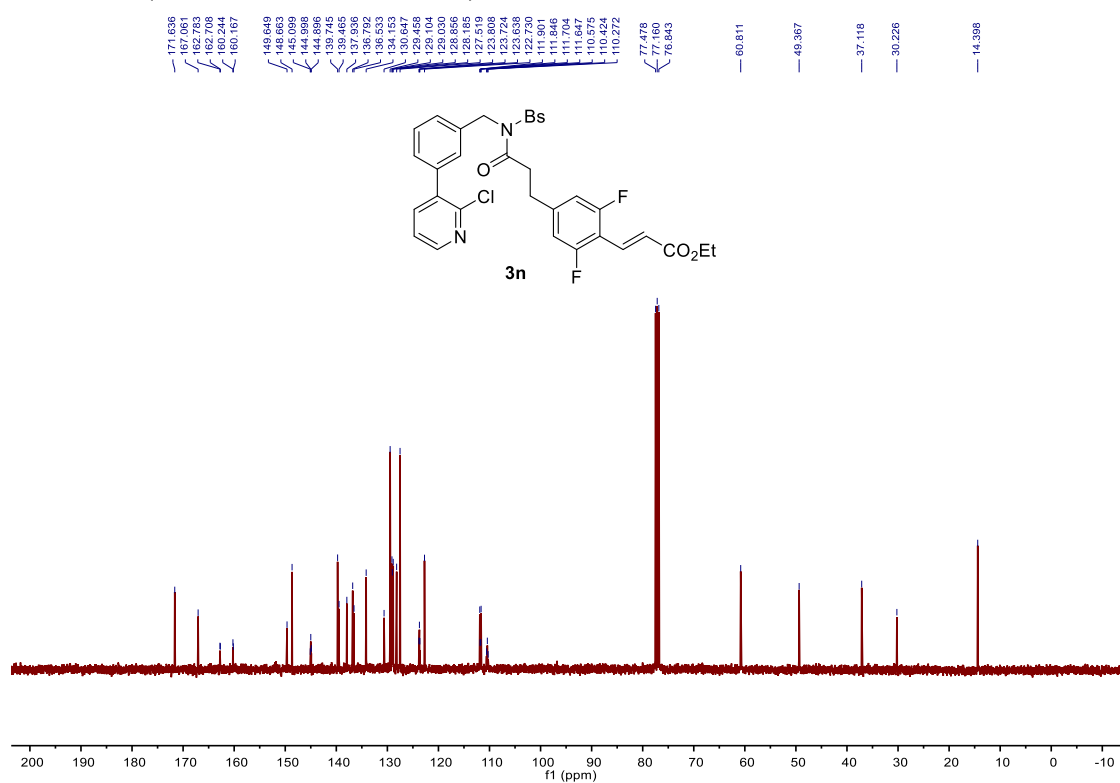

<sup>1</sup>H NMR (400 MHz, Chloroform-*d*)

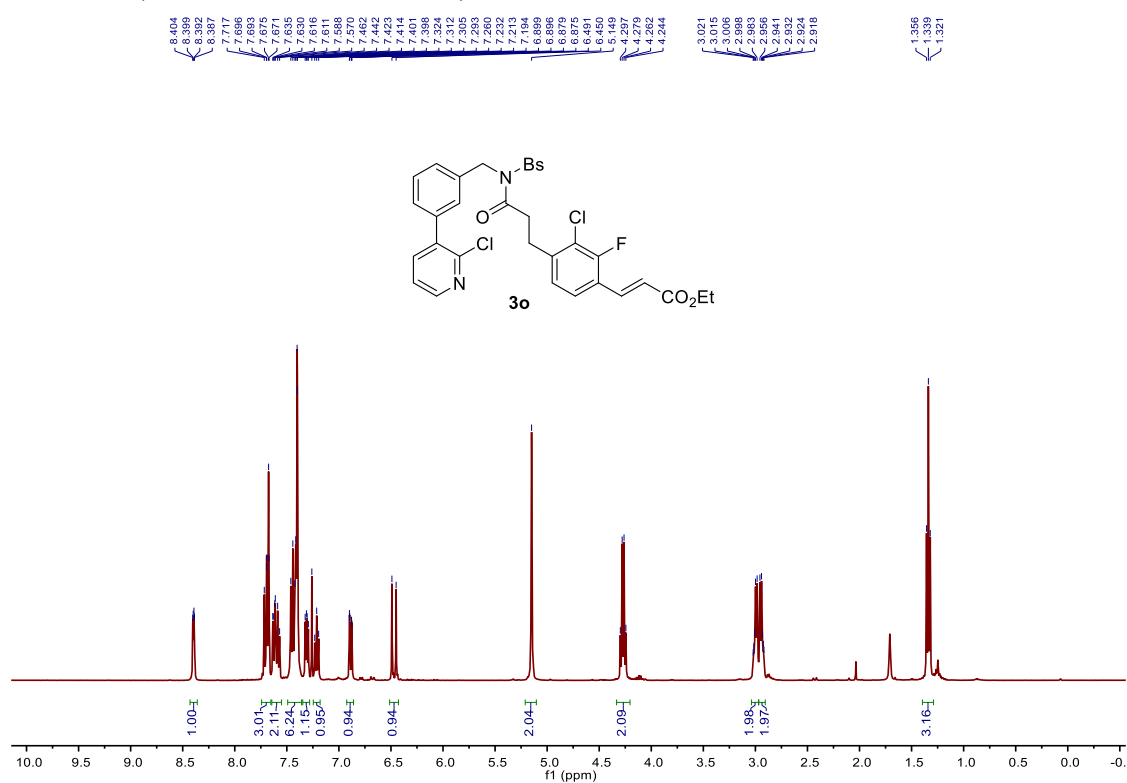

<sup>13</sup>C NMR (101 MHz, Chloroform-*d*)

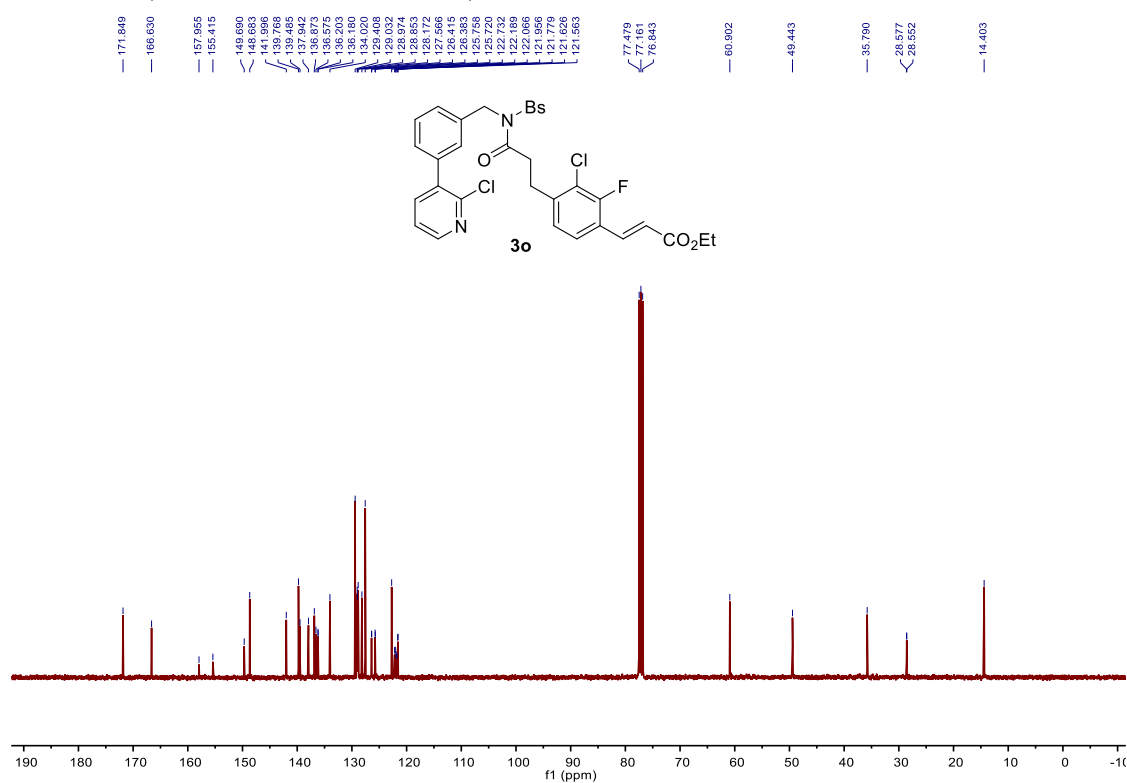

<sup>1</sup>H NMR (400 MHz, Chloroform-*d*)

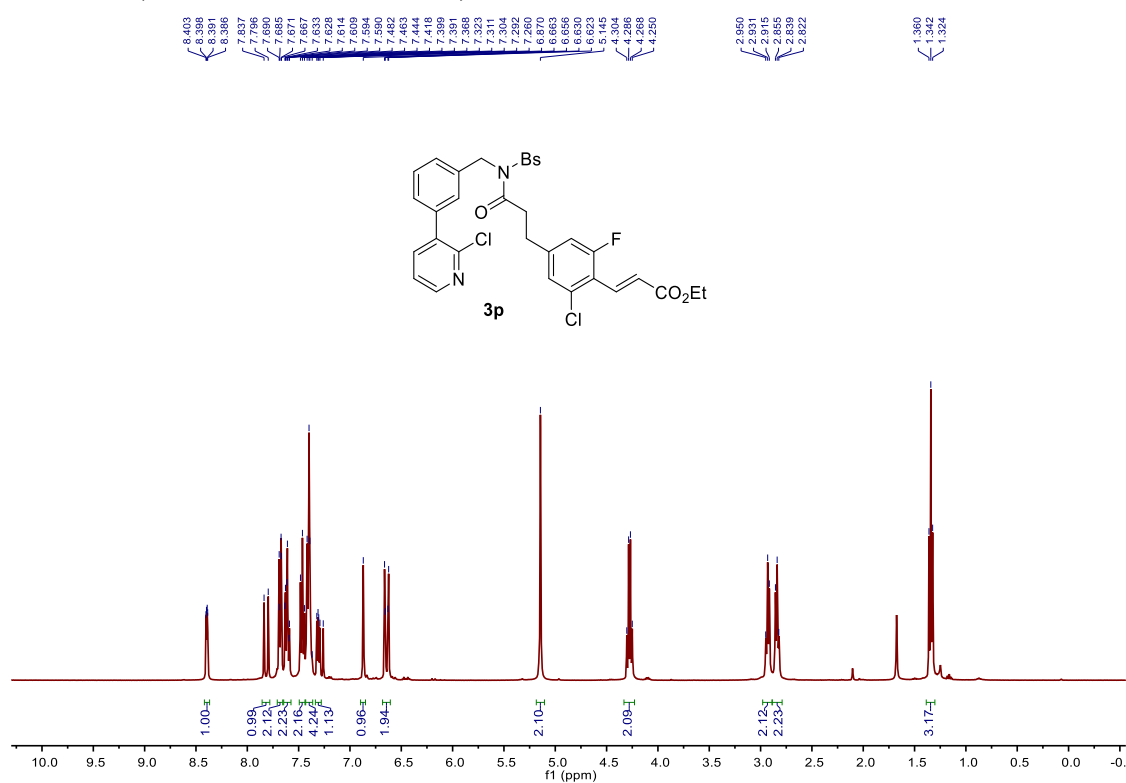

<sup>13</sup>C NMR (101 MHz, Chloroform-*d*)

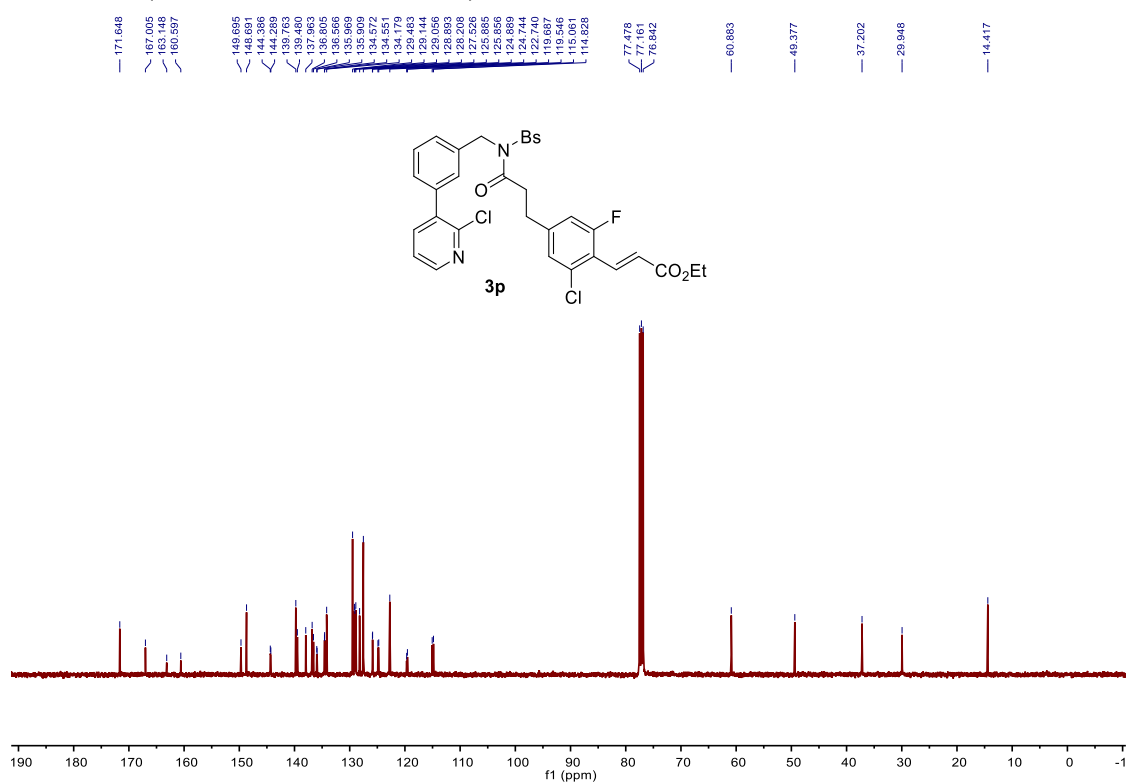

# <sup>1</sup>H NMR (400 MHz, Chloroform-*d*)

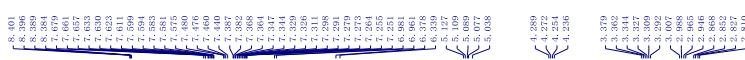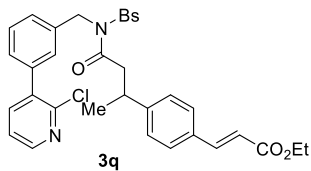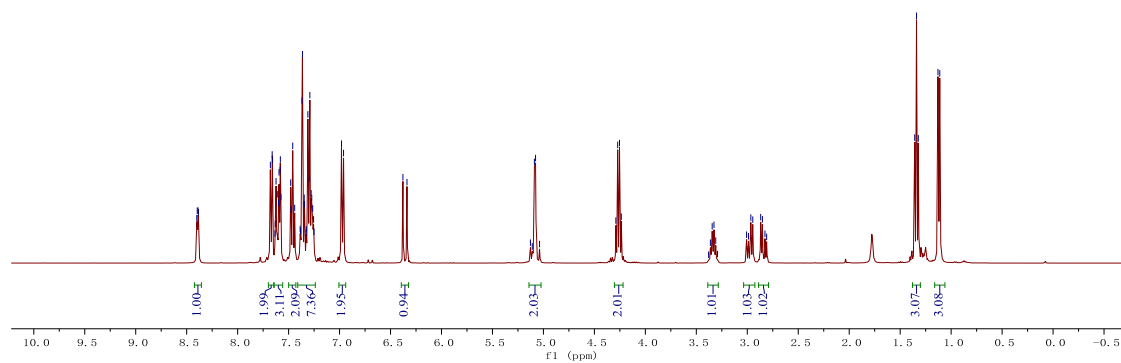

# <sup>13</sup>C NMR (101 MHz, Chloroform-*d*)

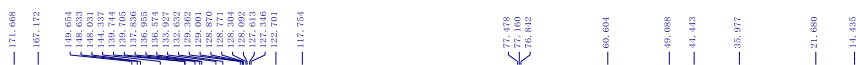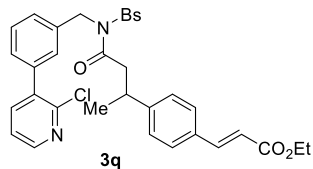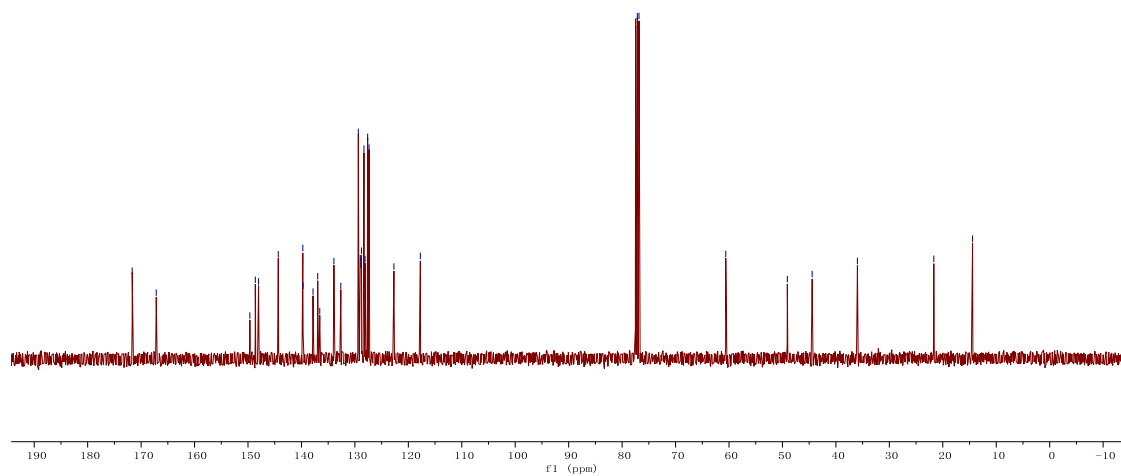

# <sup>1</sup>H NMR (400 MHz, Chloroform-*d*)

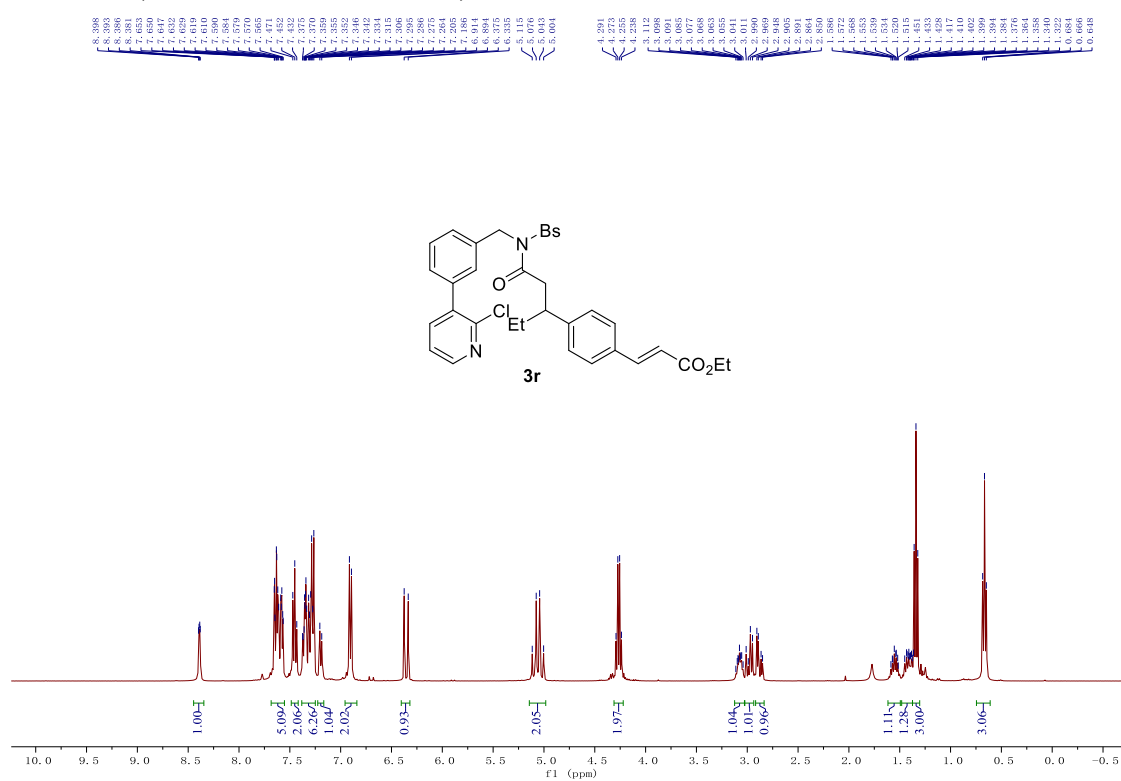

# <sup>13</sup>C NMR (101 MHz, Chloroform-*d*)

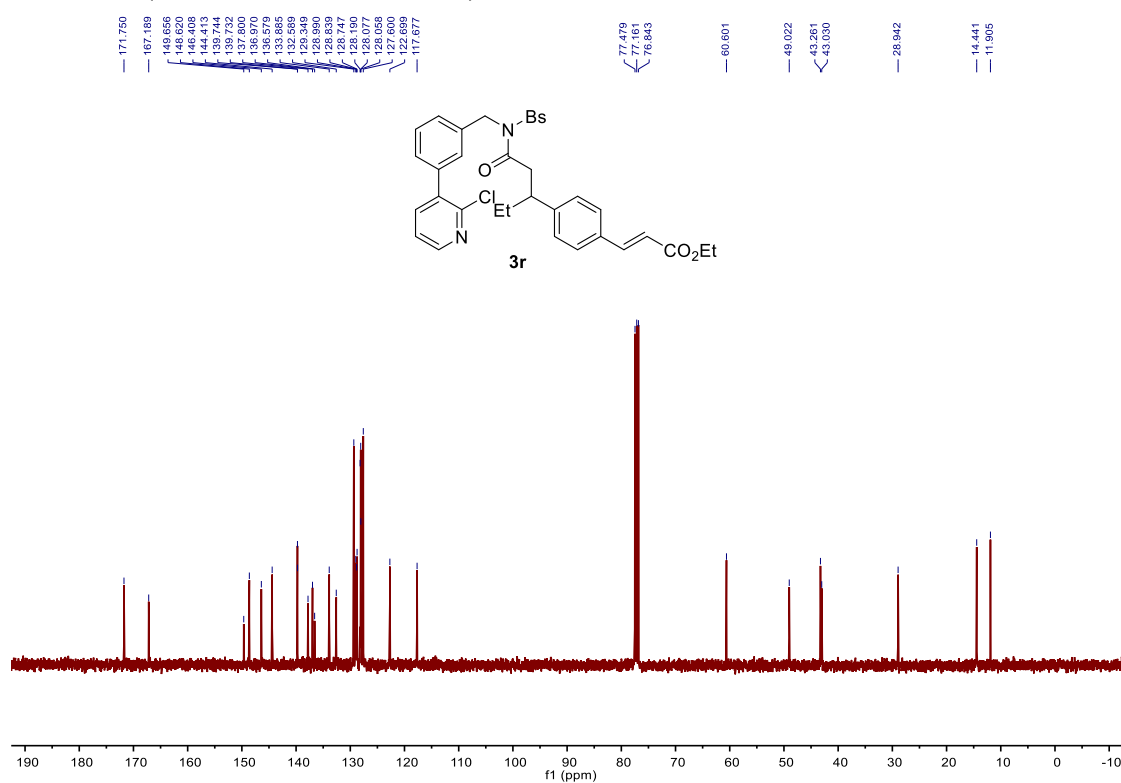

<sup>1</sup>H NMR (400 MHz, Chloroform-*d*)

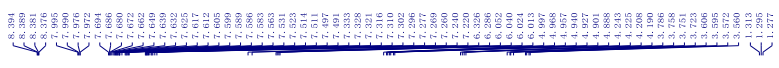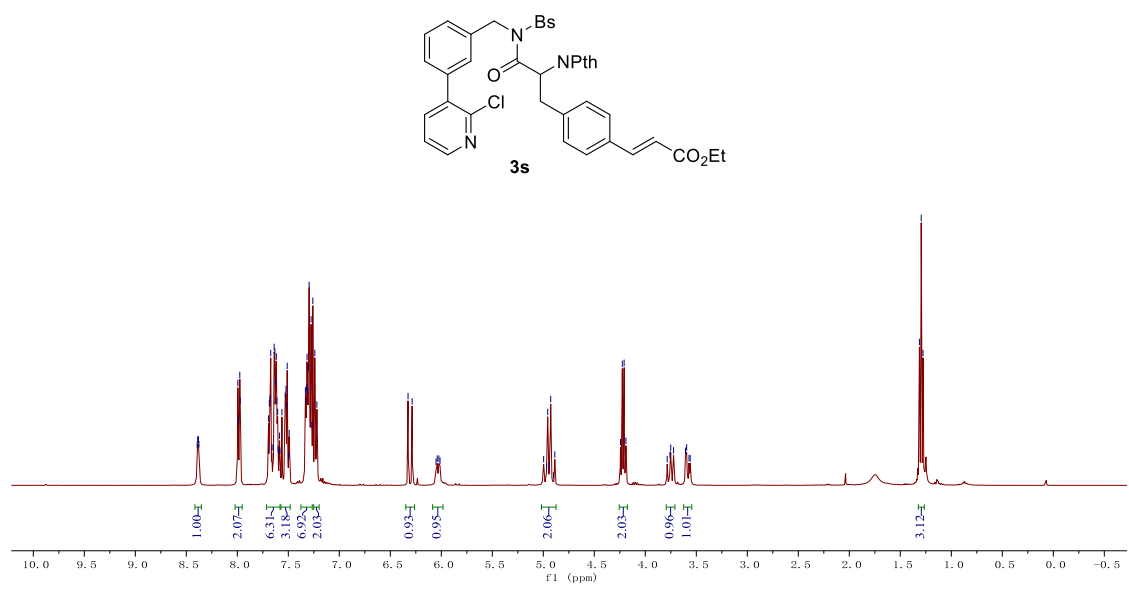

<sup>13</sup>C NMR (101 MHz, Chloroform-*d*)

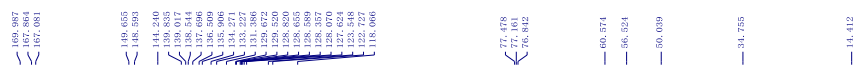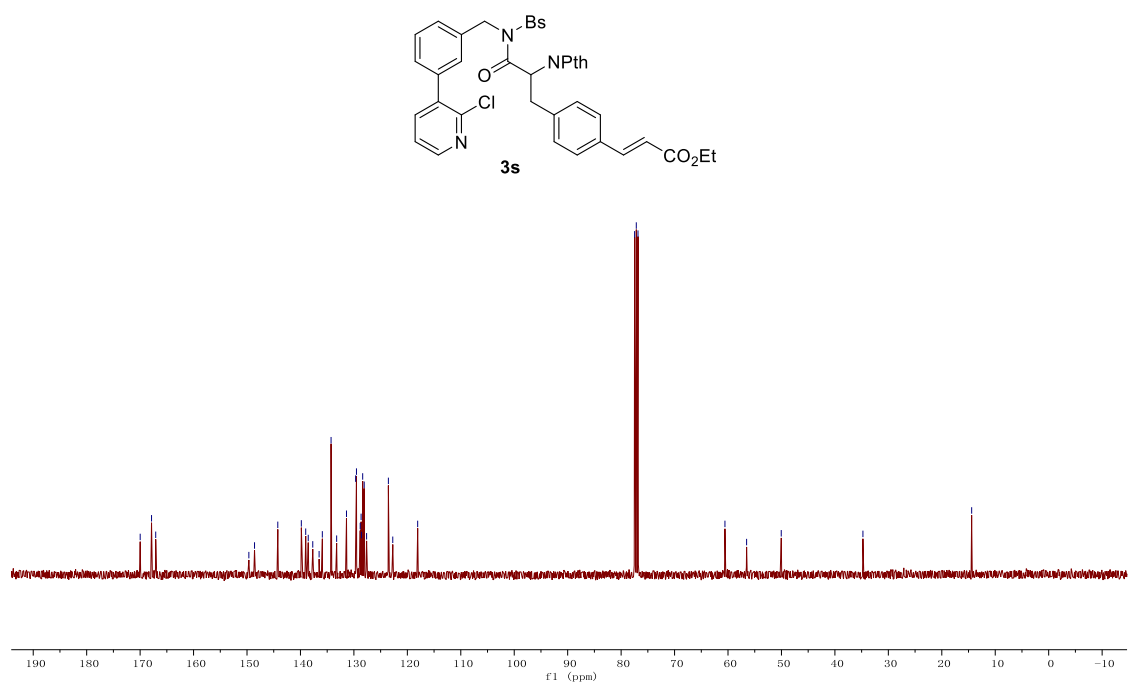

$^1\text{H}$  NMR (400 MHz, Chloroform-*d*)

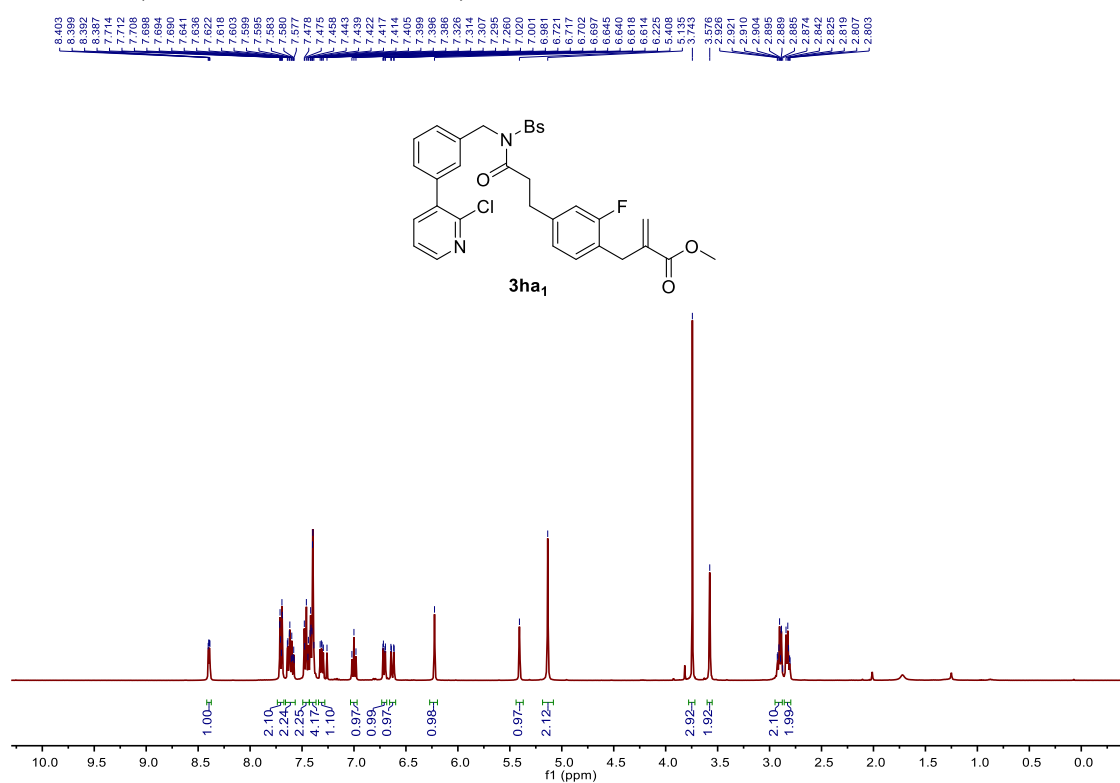

$^{13}\text{C}$  NMR (101 MHz, Chloroform-*d*)

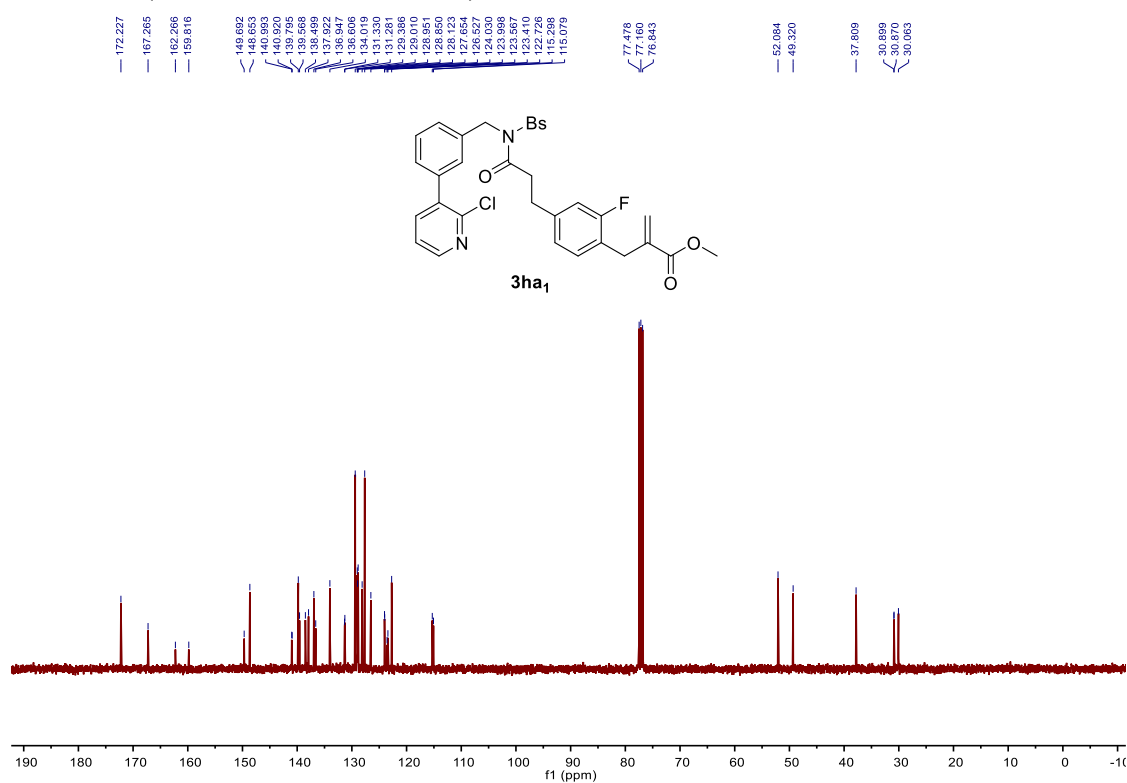



<sup>1</sup>H NMR (400 MHz, Chloroform-*d*)

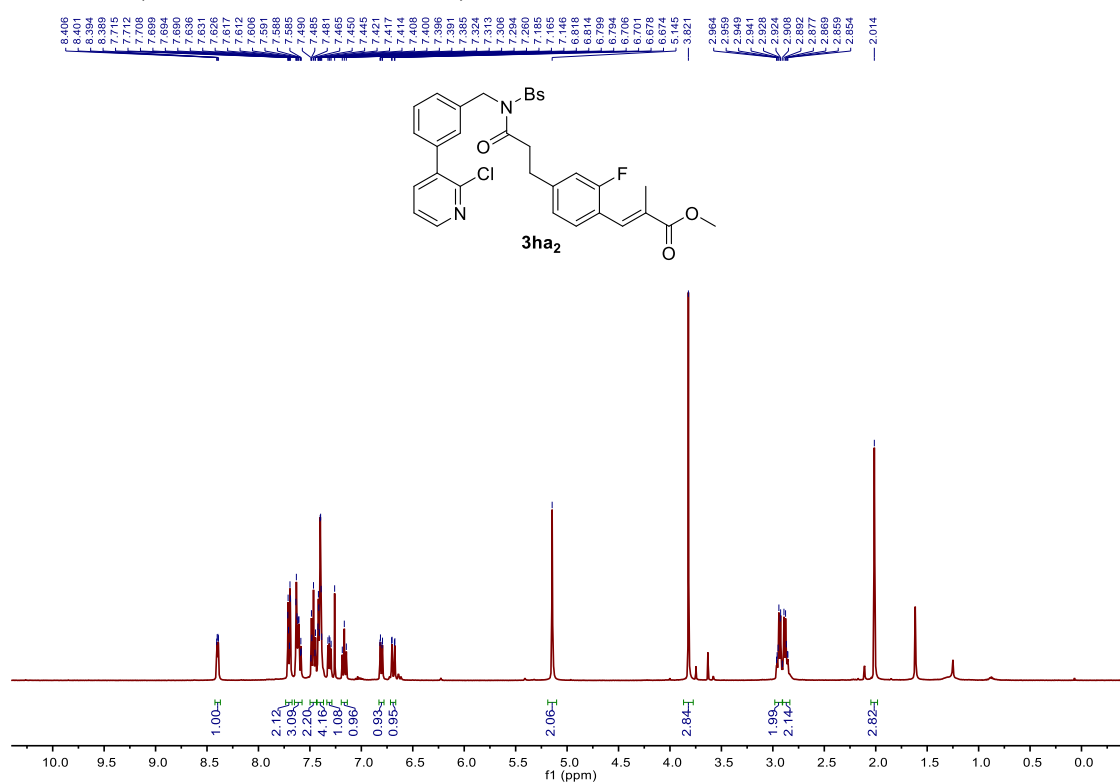

<sup>13</sup>C NMR (101 MHz, Chloroform-*d*)

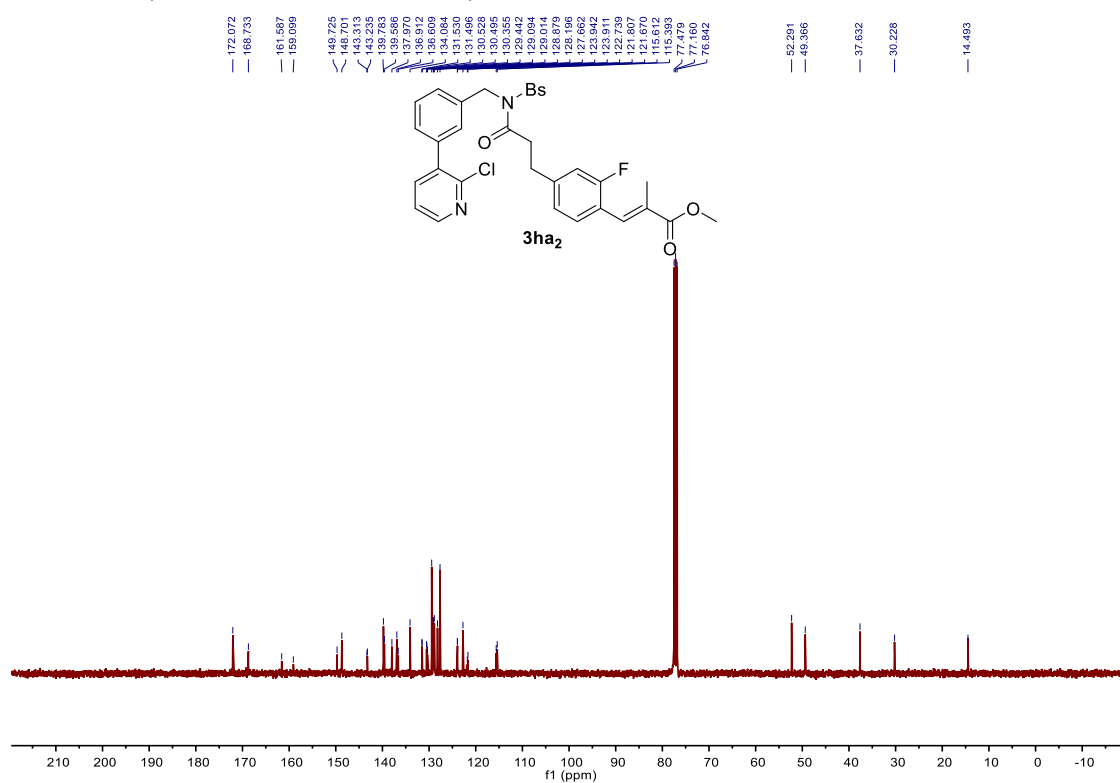

# <sup>1</sup>H NMR (400 MHz, Chloroform-*d*)

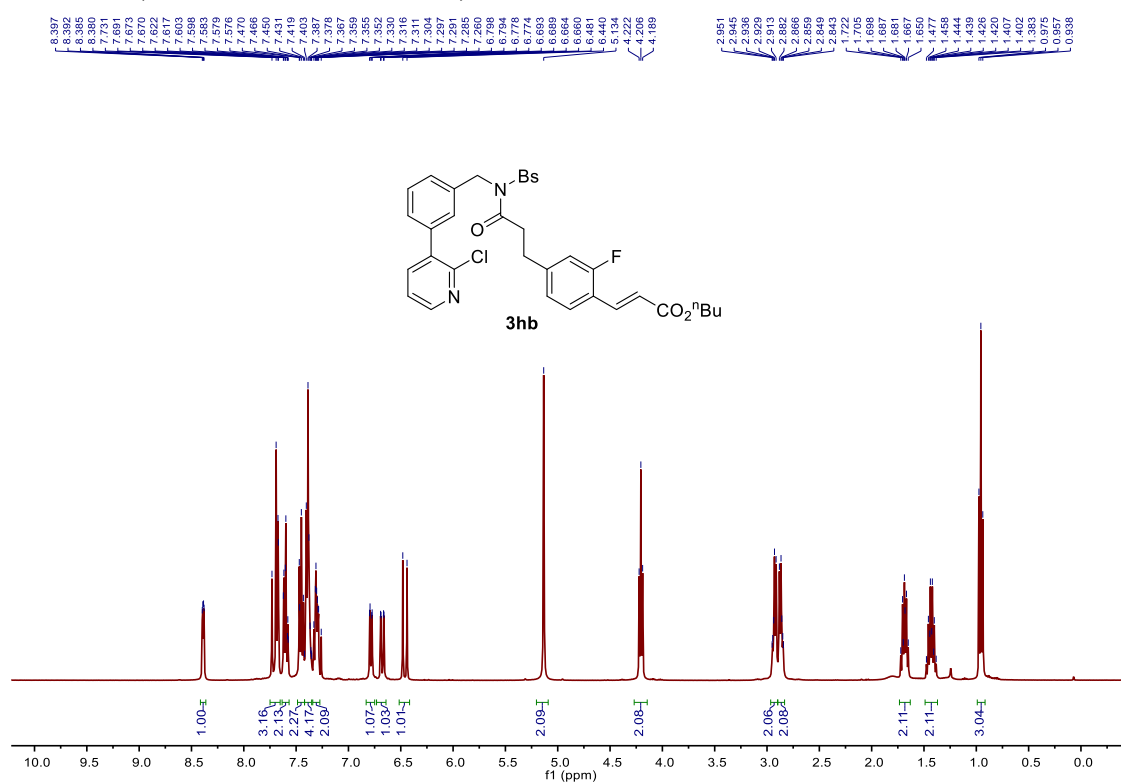

# <sup>13</sup>C NMR (101 MHz, Chloroform-*d*)

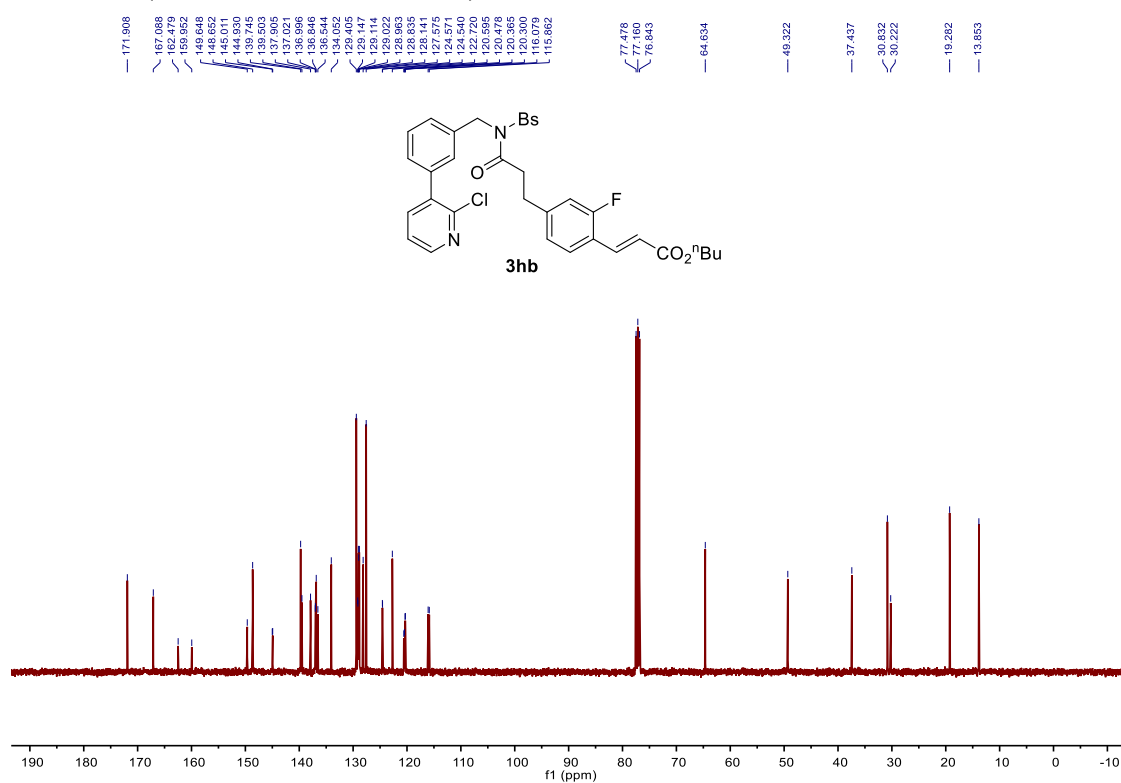

# <sup>1</sup>H NMR (400 MHz, Chloroform-*d*)

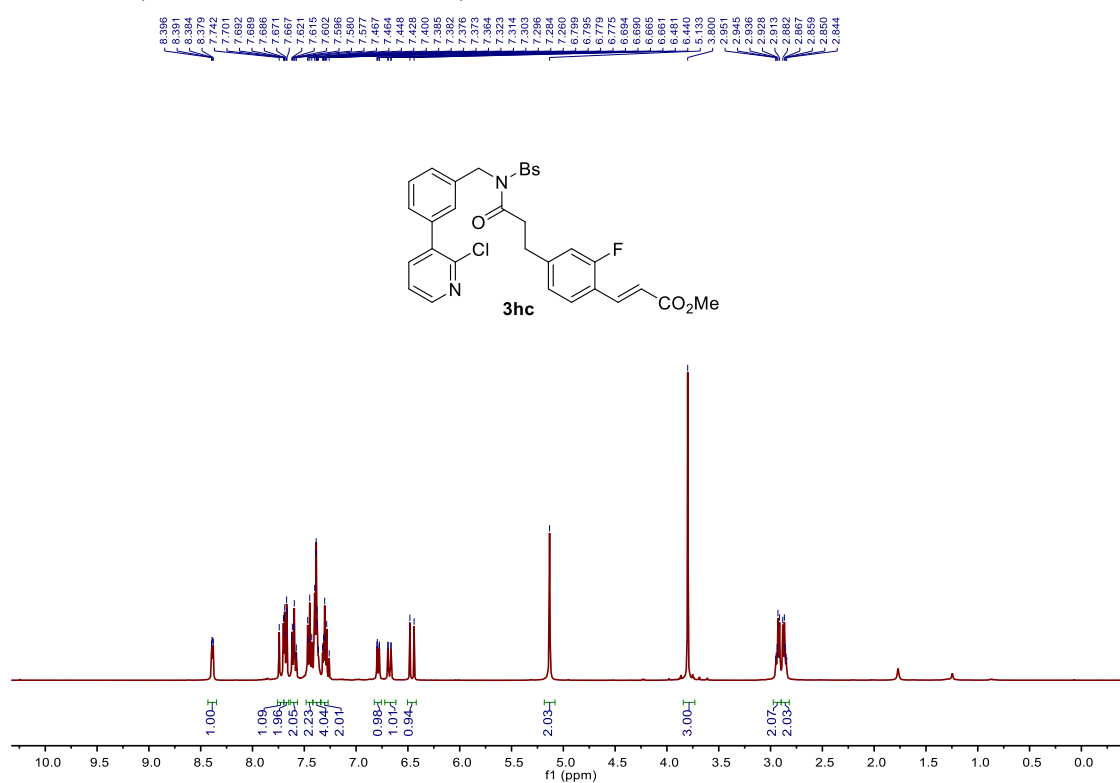

# <sup>13</sup>C NMR (101 MHz, Chloroform-*d*)

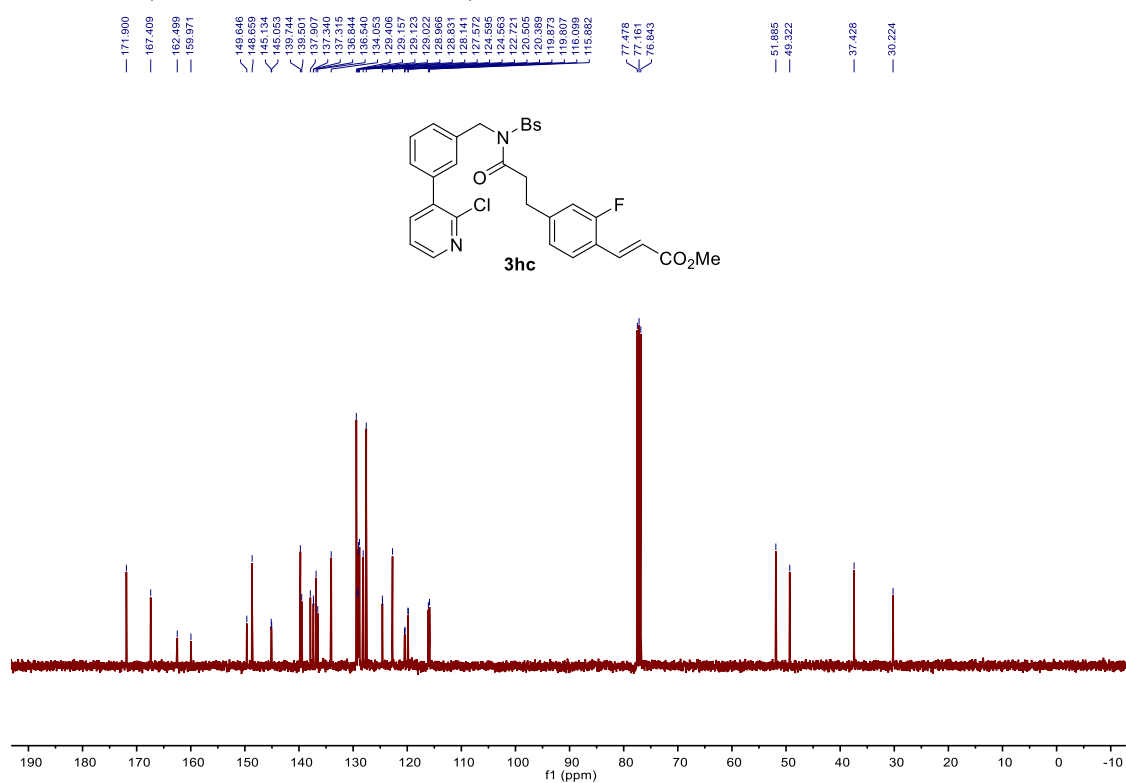

<sup>1</sup>H NMR (400 MHz, Chloroform-*d*)

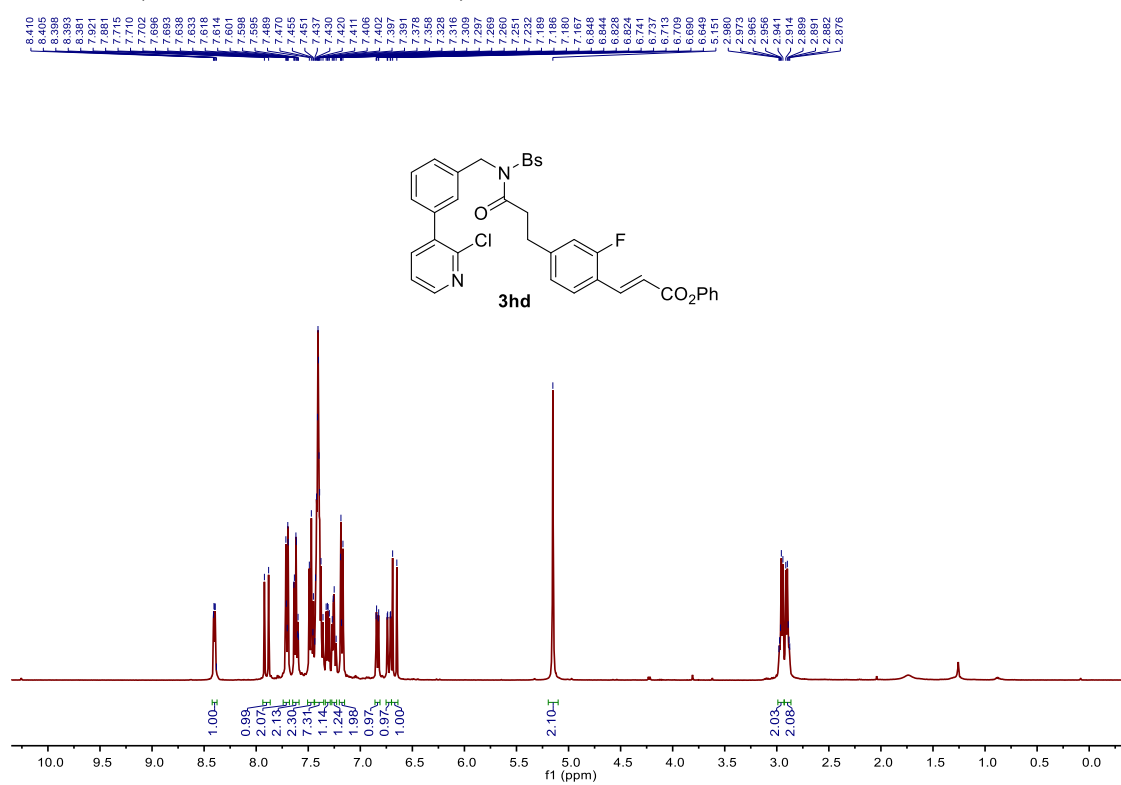

<sup>13</sup>C NMR (101 MHz, Chloroform-*d*)

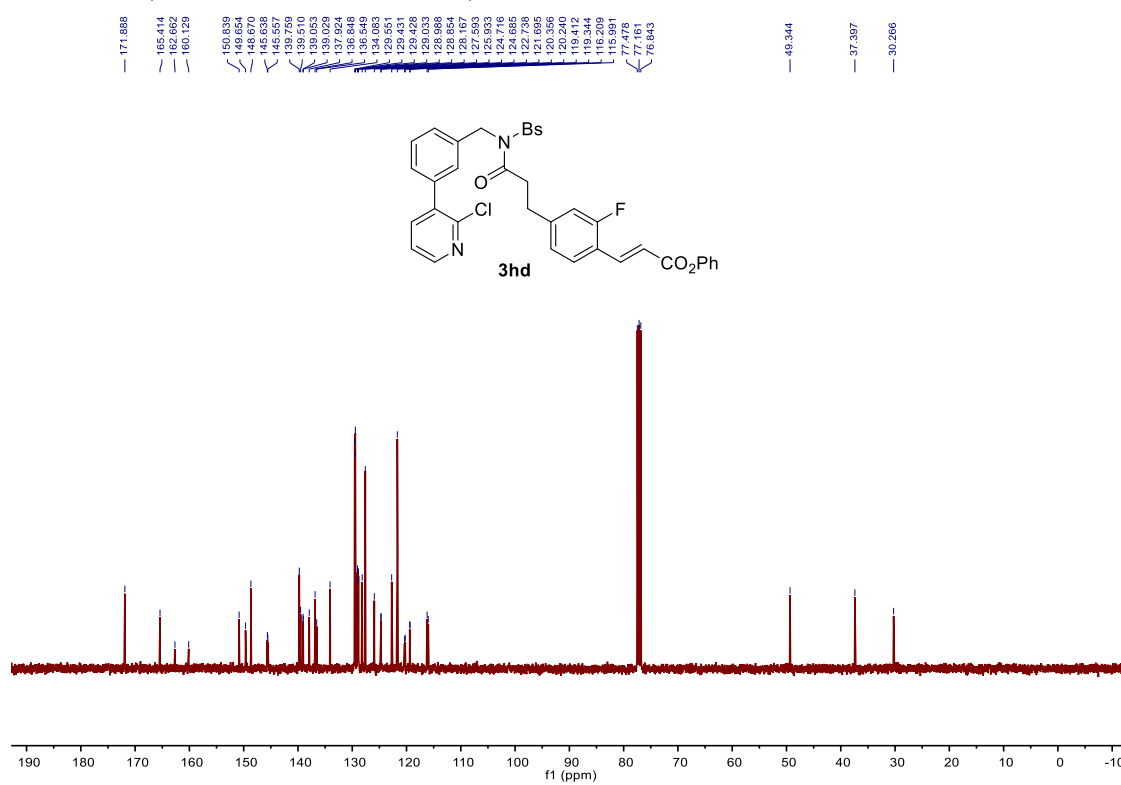

<sup>1</sup>H NMR (400 MHz, Chloroform-*d*)

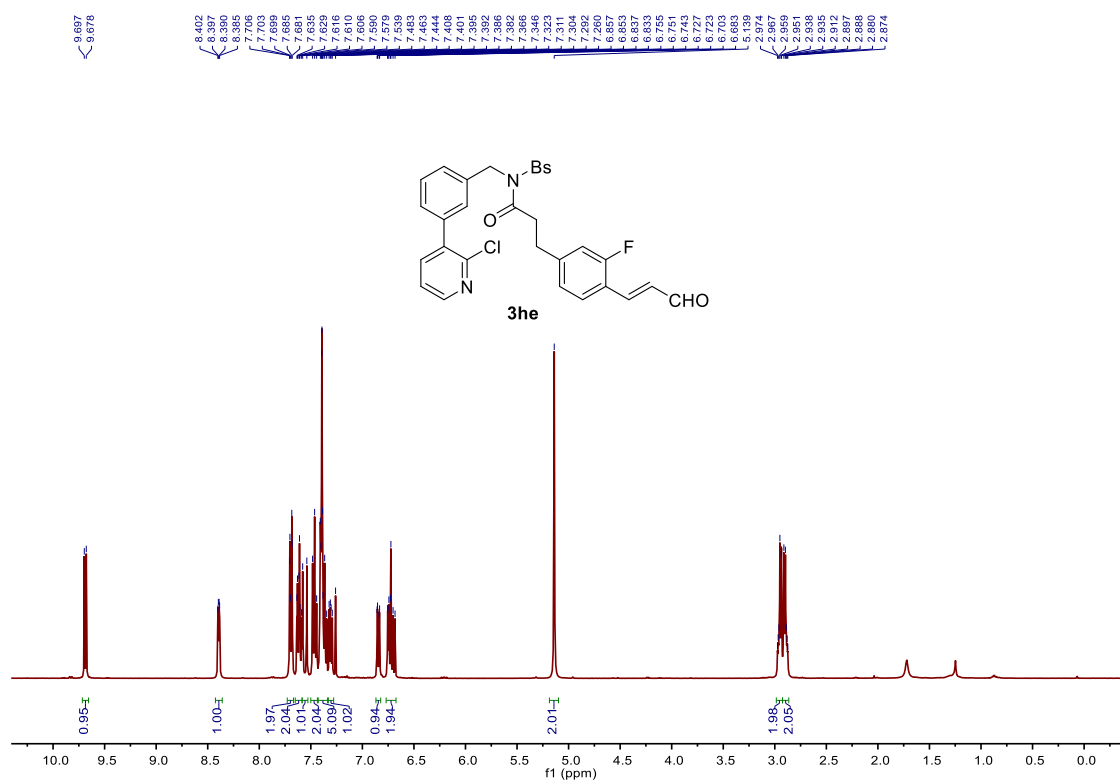

<sup>13</sup>C NMR (101 MHz, Chloroform-*d*)

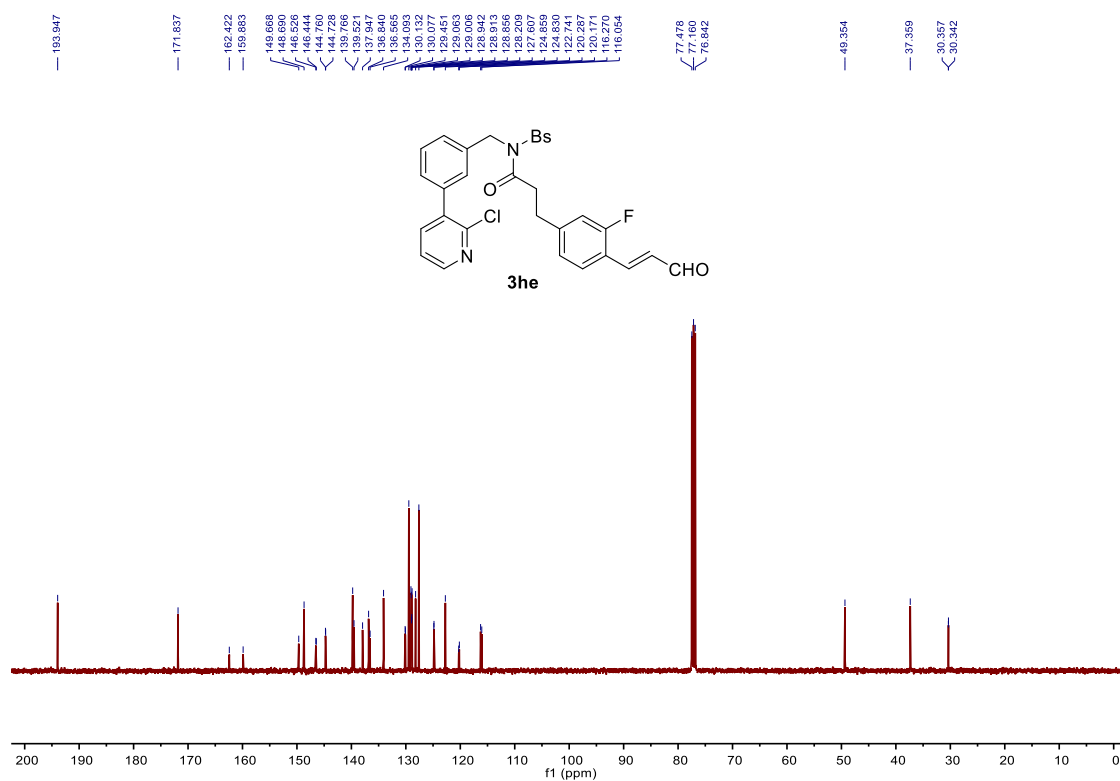

<sup>1</sup>H NMR (400 MHz, Chloroform-*d*)

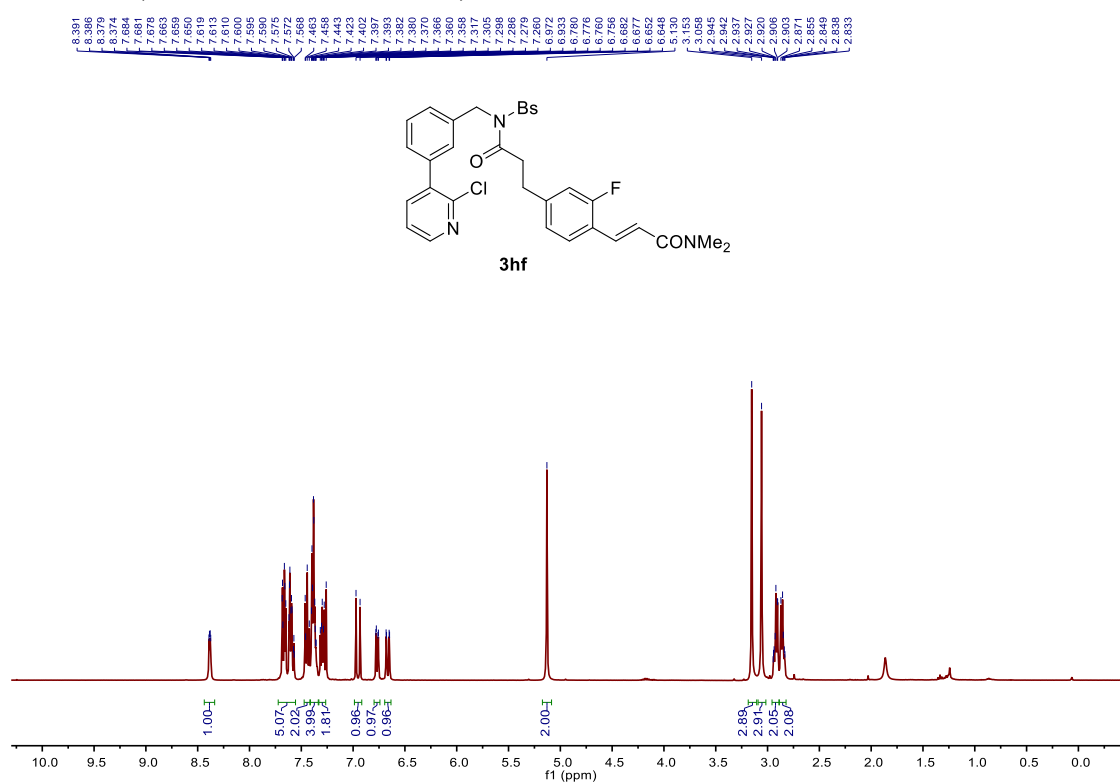

<sup>13</sup>C NMR (101 MHz, Chloroform-*d*)

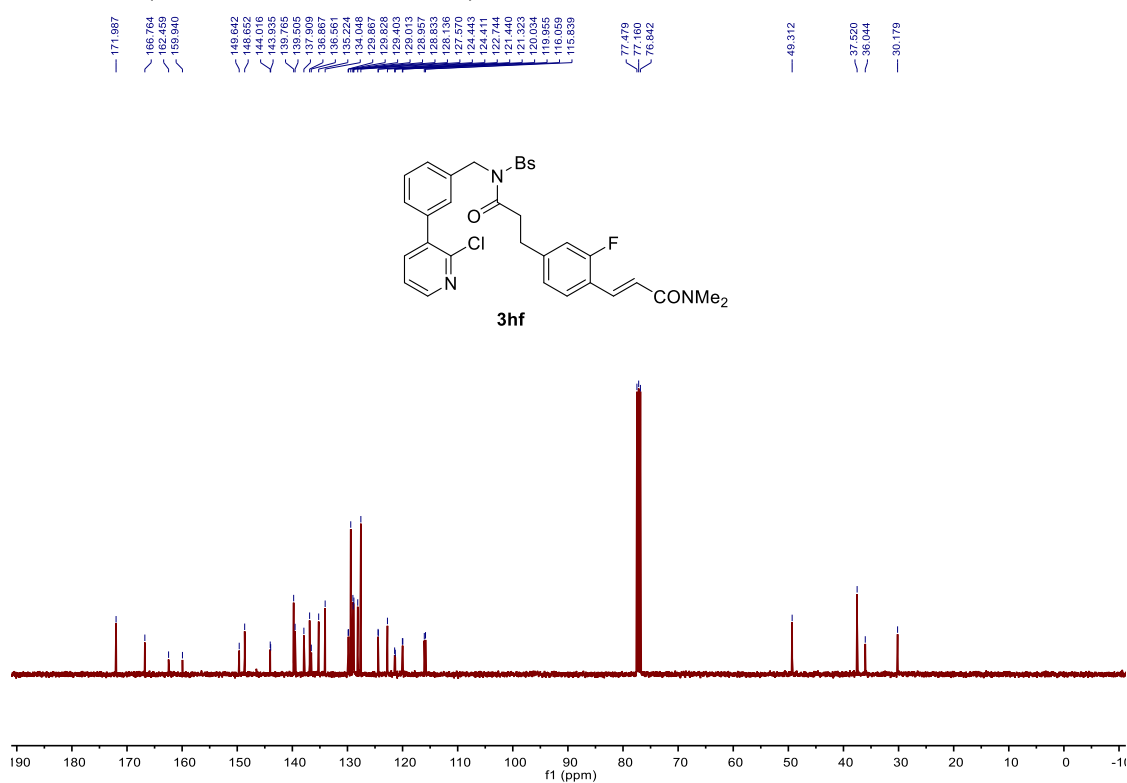

<sup>1</sup>H NMR (400 MHz, Chloroform-*d*)

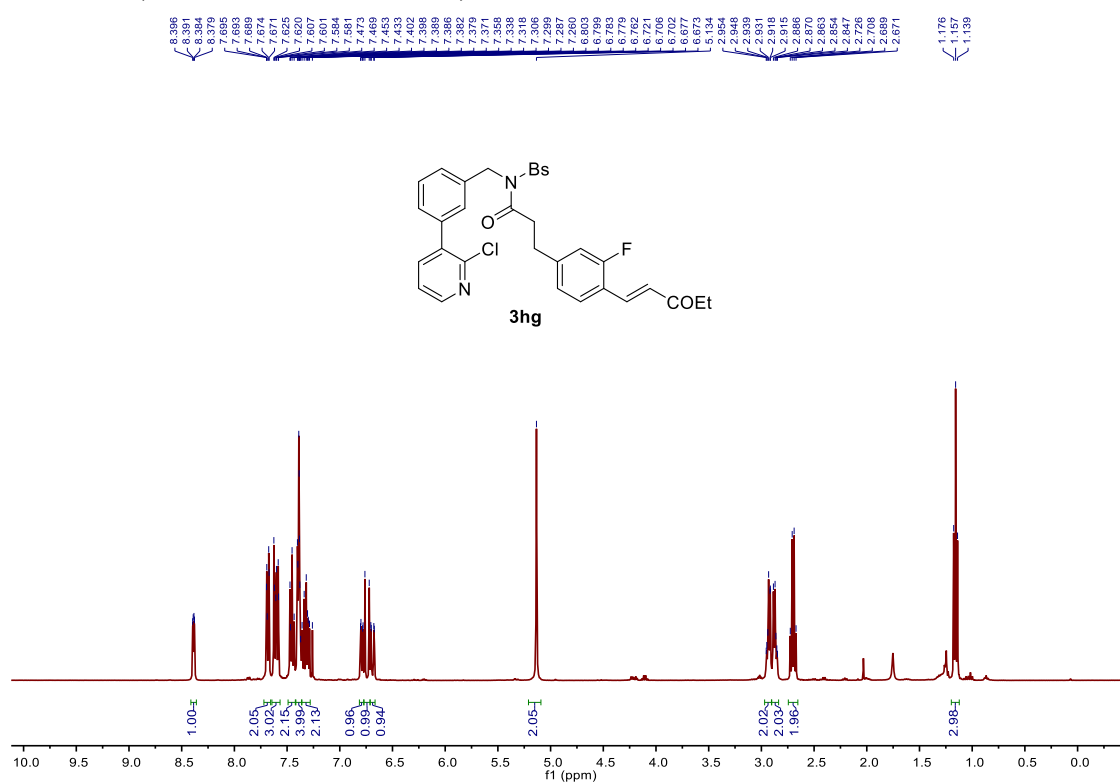

<sup>13</sup>C NMR (101 MHz, Chloroform-*d*)

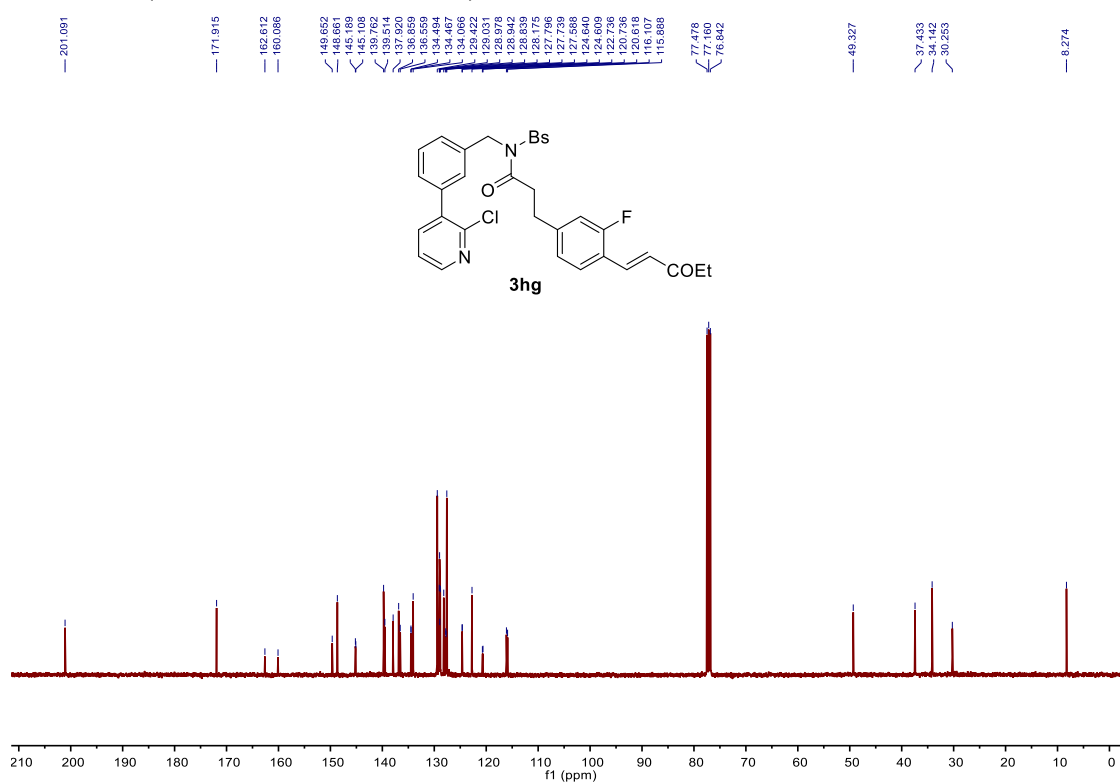

<sup>1</sup>H NMR (400 MHz, Chloroform-*d*)

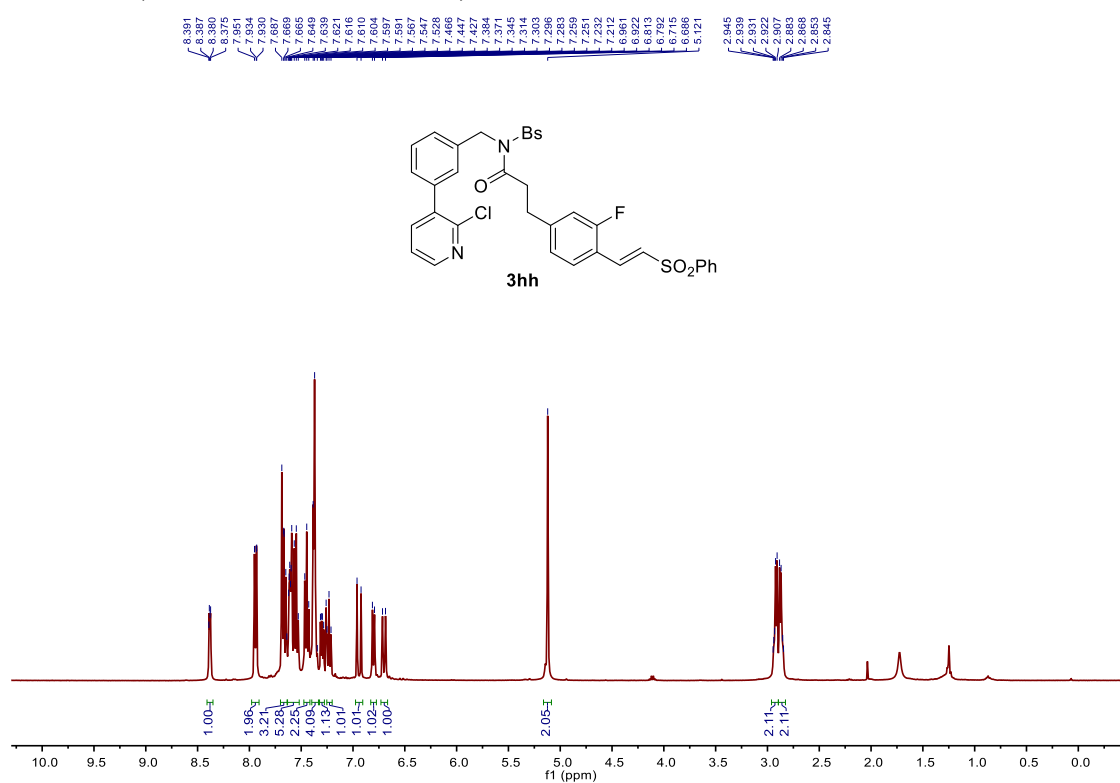

<sup>13</sup>C NMR (101 MHz, Chloroform-*d*)

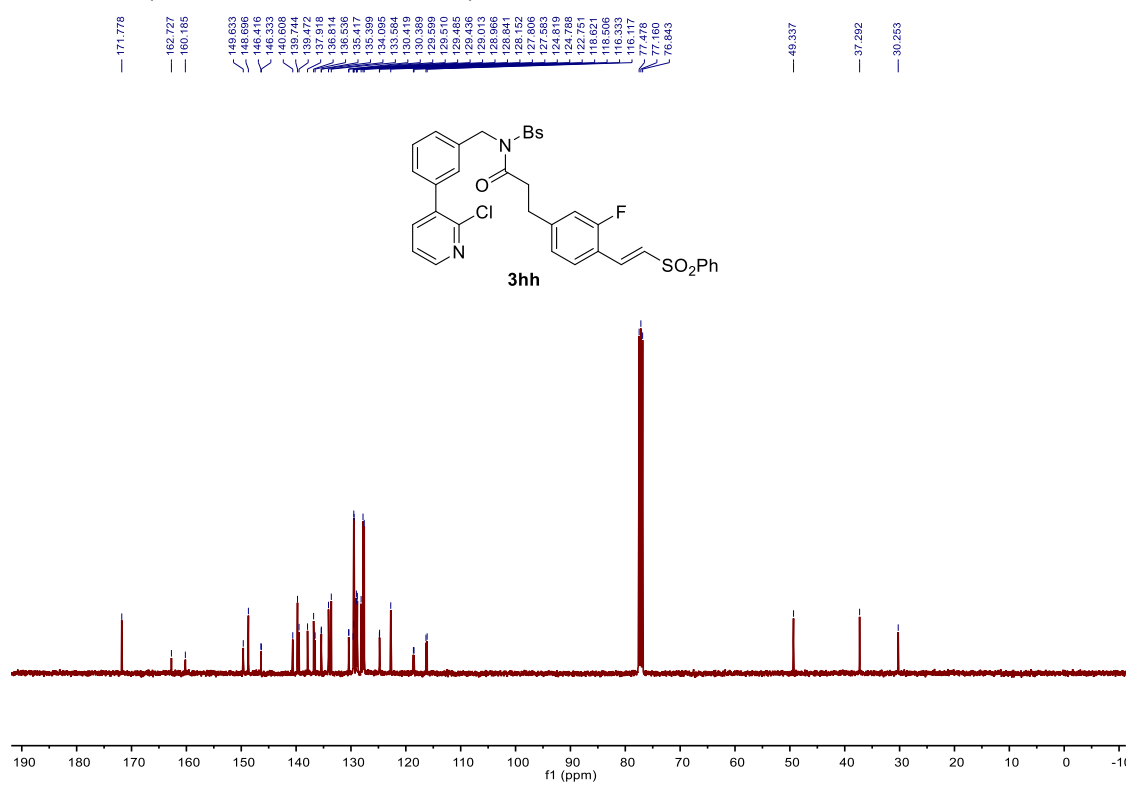



<sup>1</sup>H NMR (400 MHz, Chloroform-*d*)

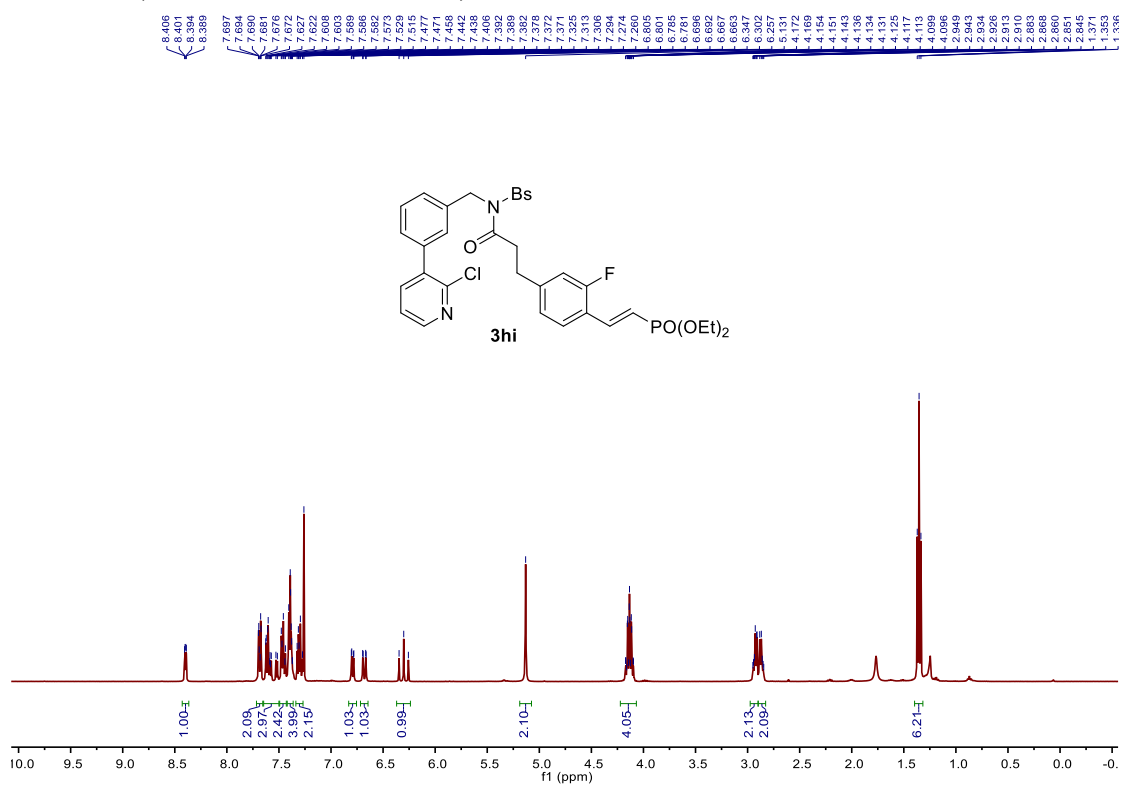

<sup>13</sup>C NMR (101 MHz, Chloroform-*d*)

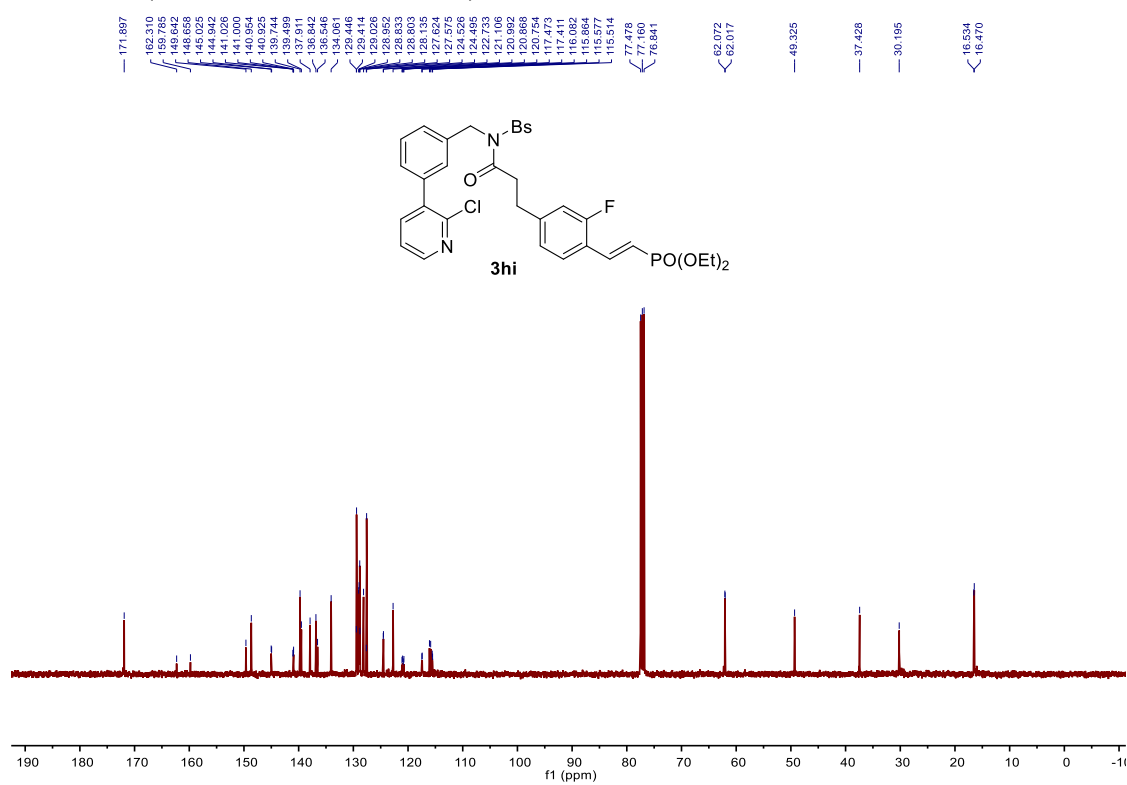

<sup>1</sup>H NMR (400 MHz, Chloroform-*d*)

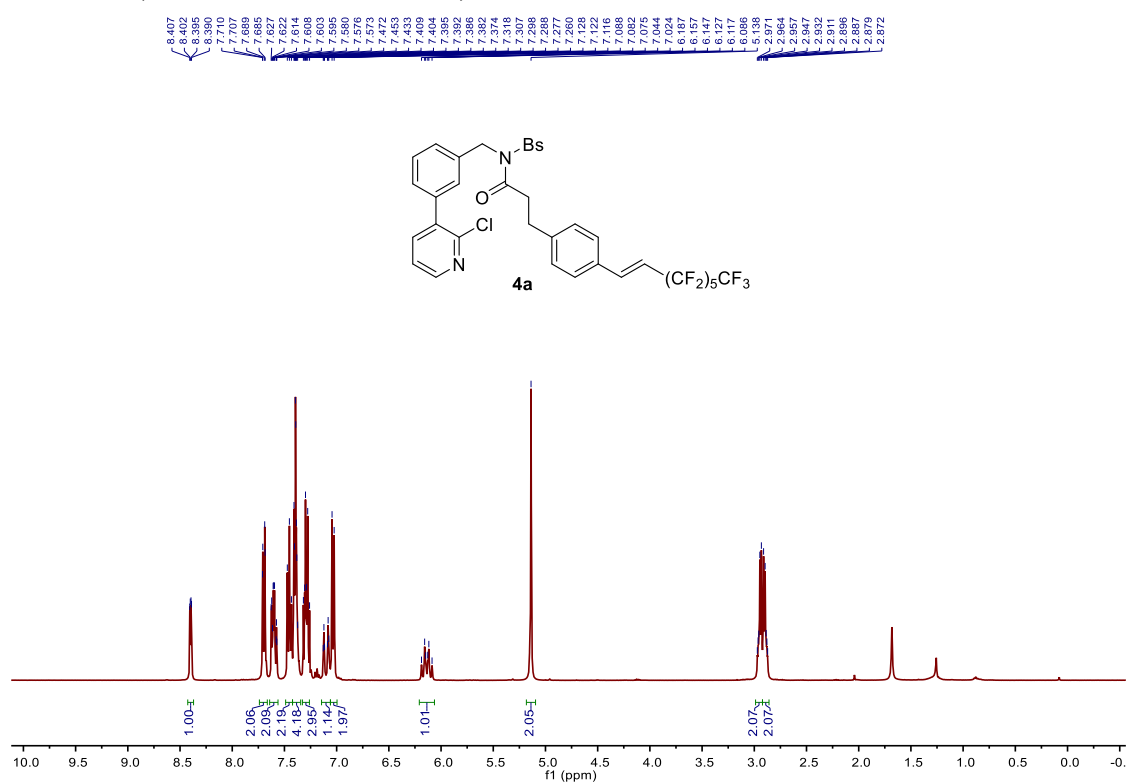

<sup>13</sup>C NMR (101 MHz, Chloroform-*d*)

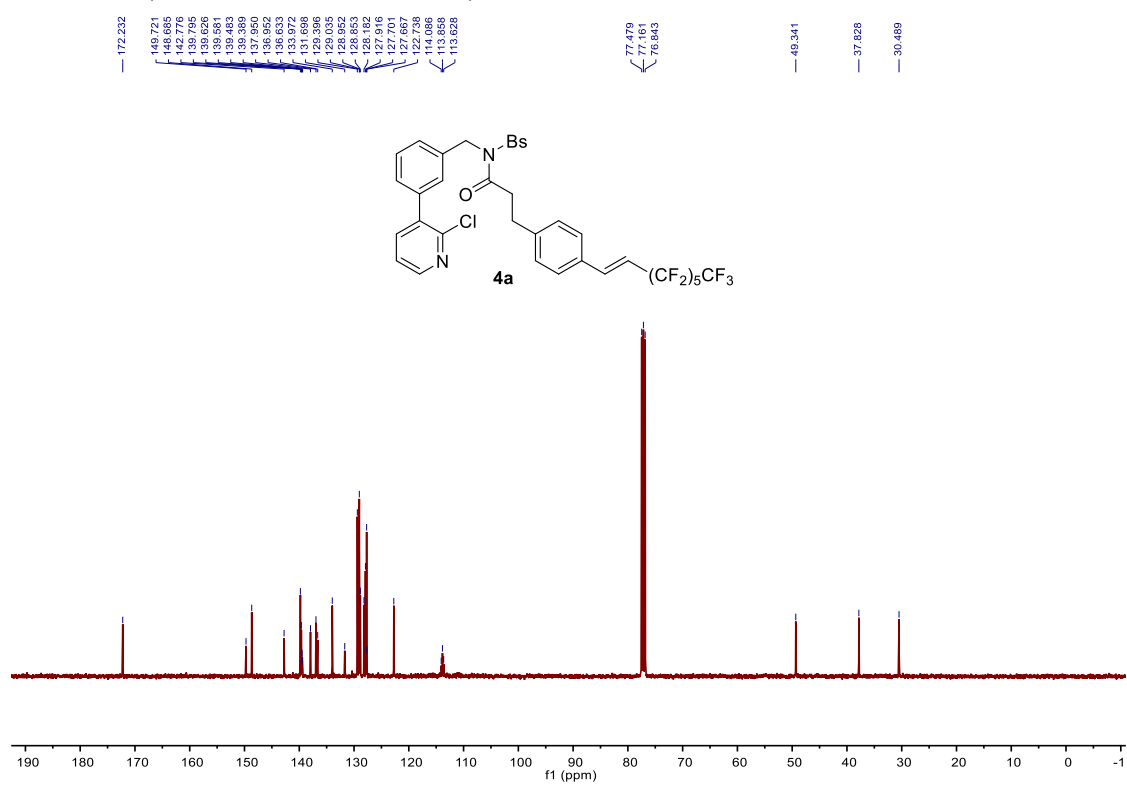

$^{19}\text{F}$  NMR (376 MHz, Chloroform-*d*)

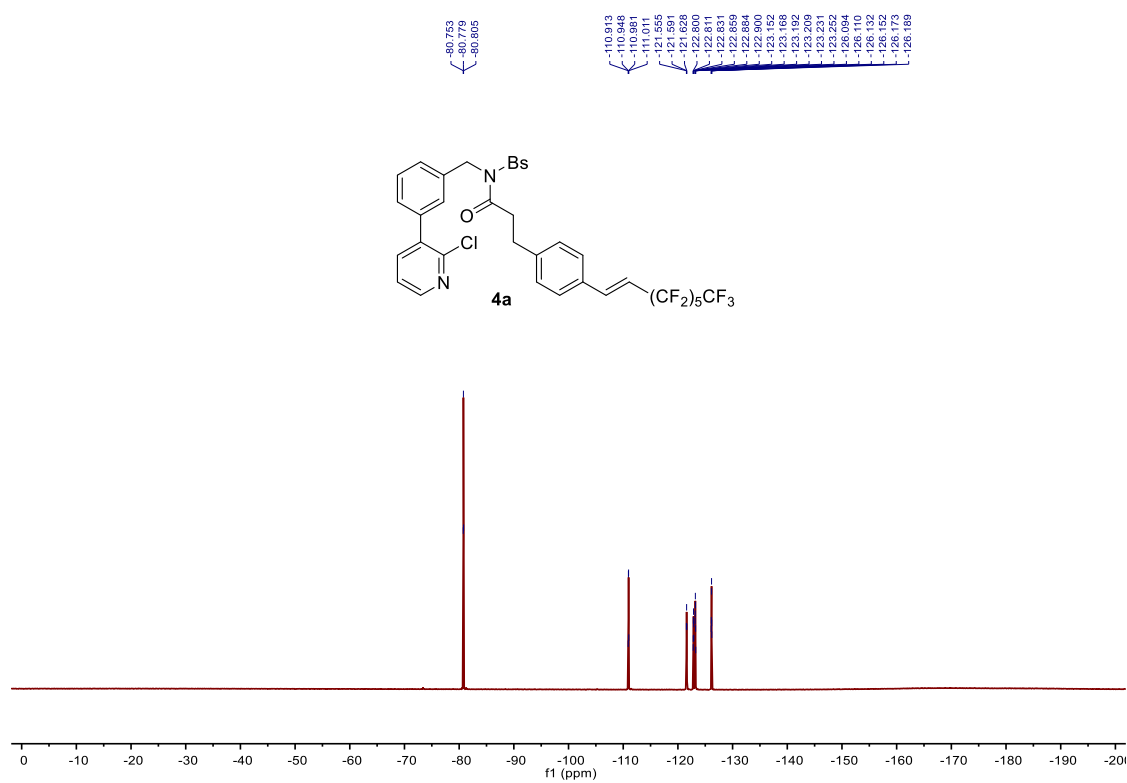

<sup>1</sup>H NMR (400 MHz, Chloroform-*d*)

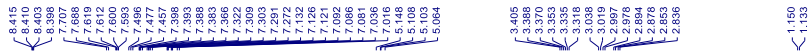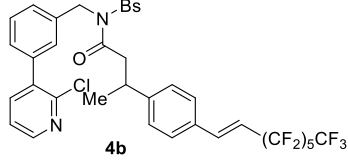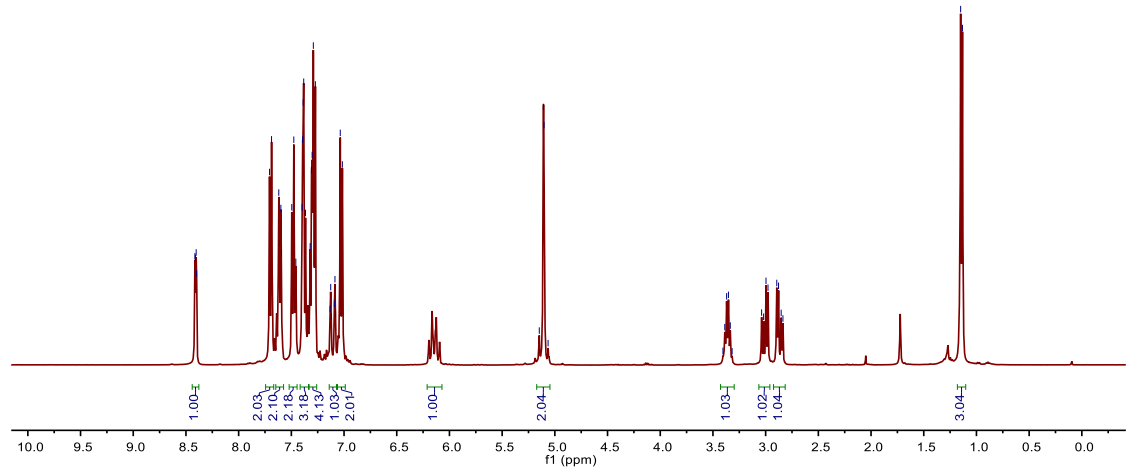

<sup>13</sup>C NMR (101 MHz, Chloroform-*d*)

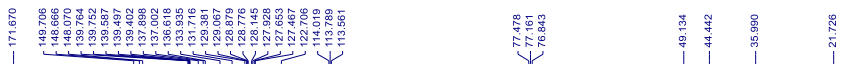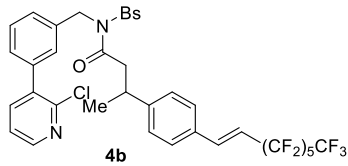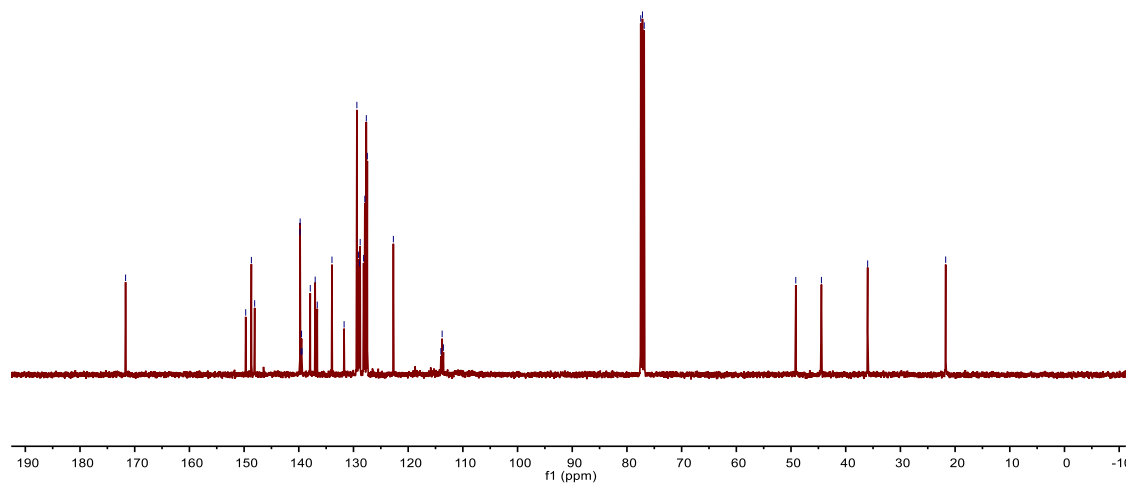

<sup>19</sup>F NMR (376 MHz, Chloroform-*d*)

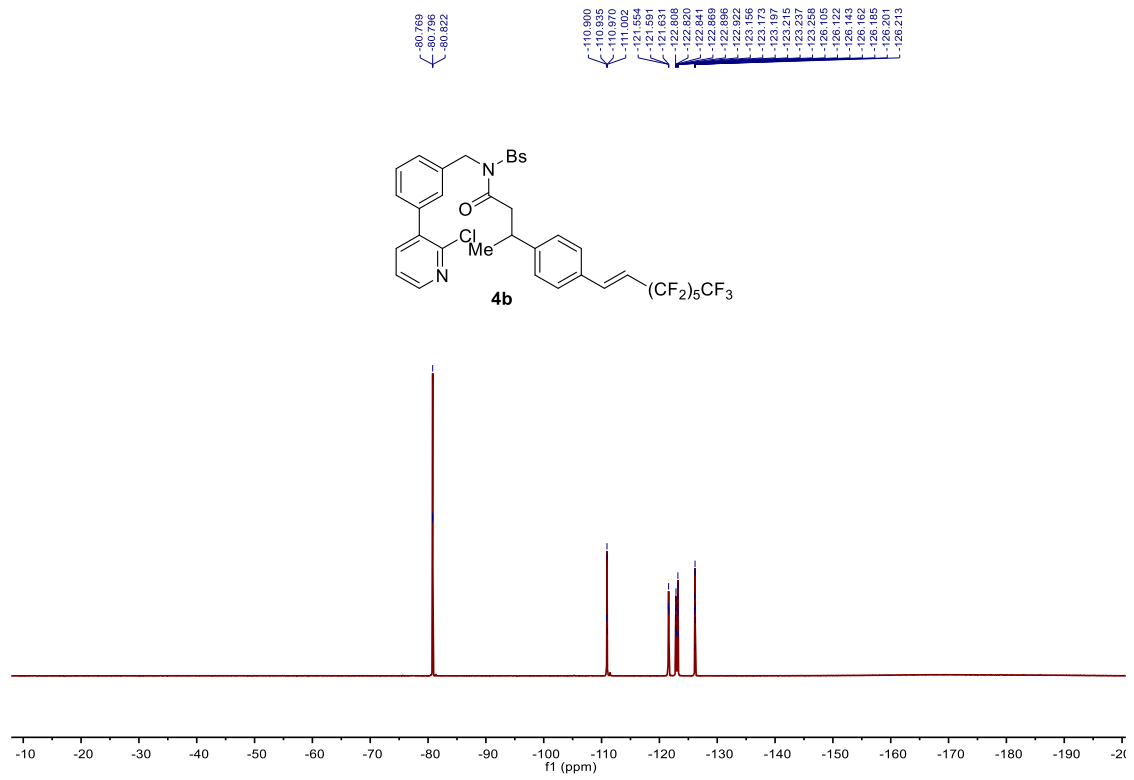

<sup>1</sup>H NMR (400 MHz, Chloroform-*d*)

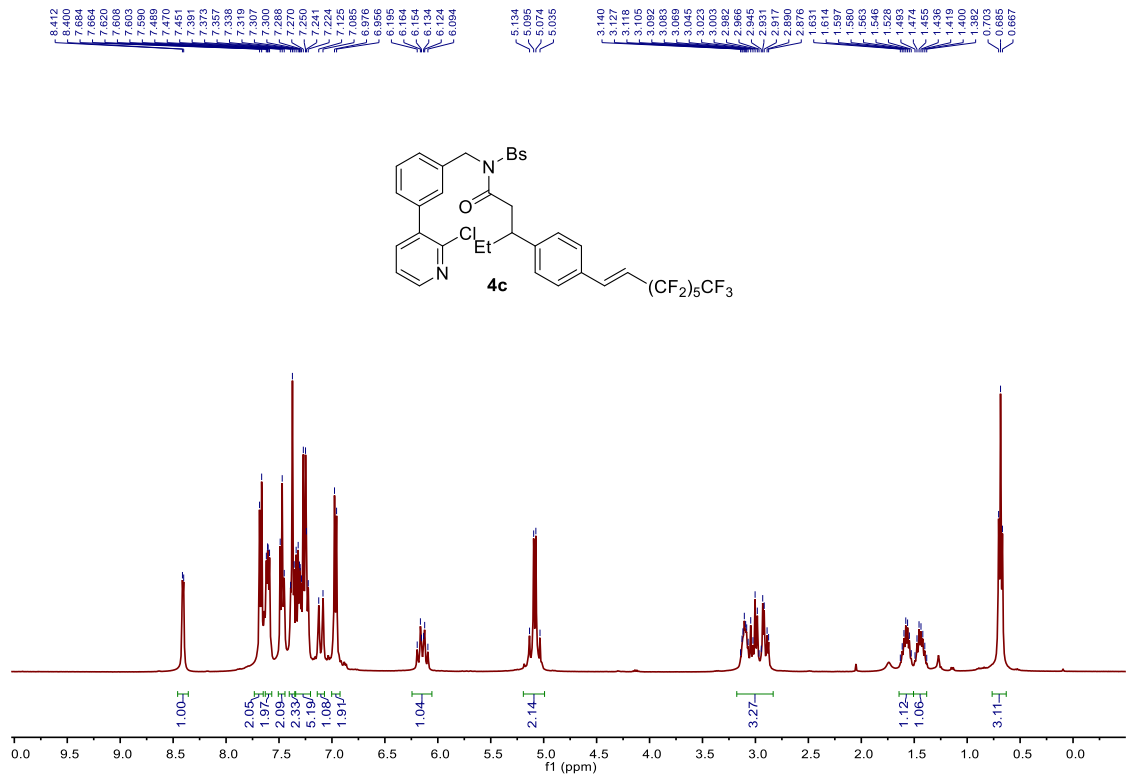

<sup>13</sup>C NMR (101 MHz, Chloroform-*d*)

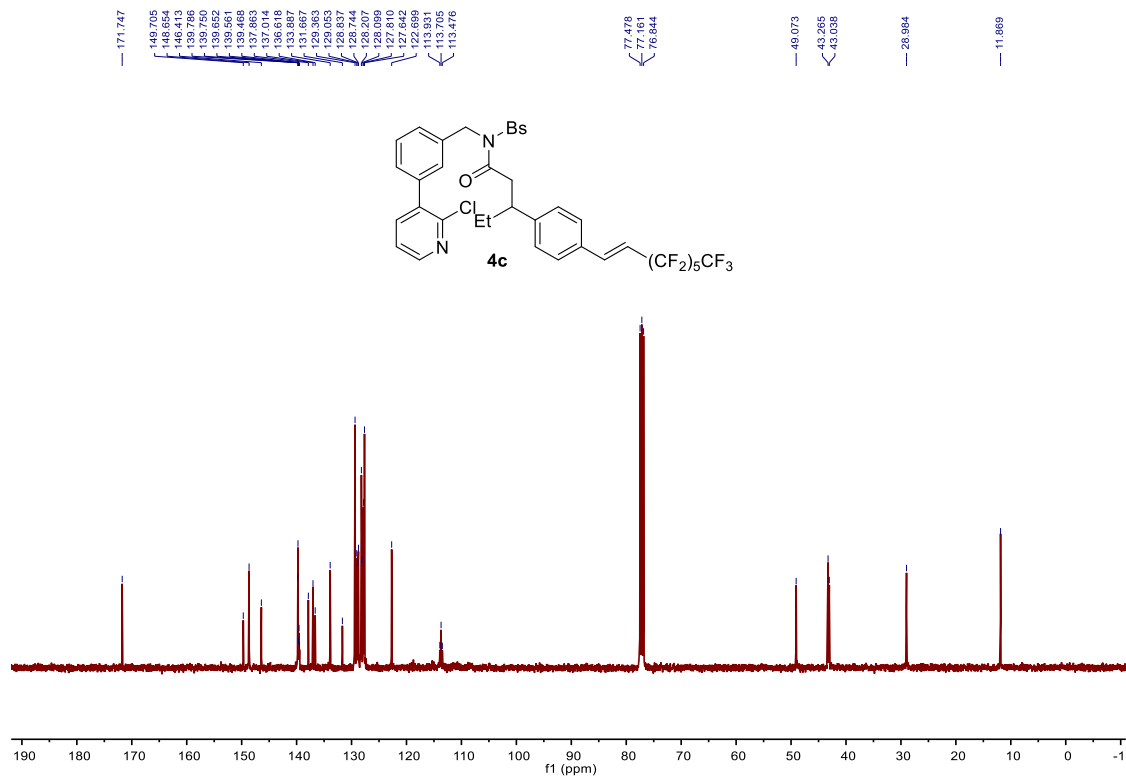

<sup>19</sup>F NMR (376 MHz, Chloroform-*d*)

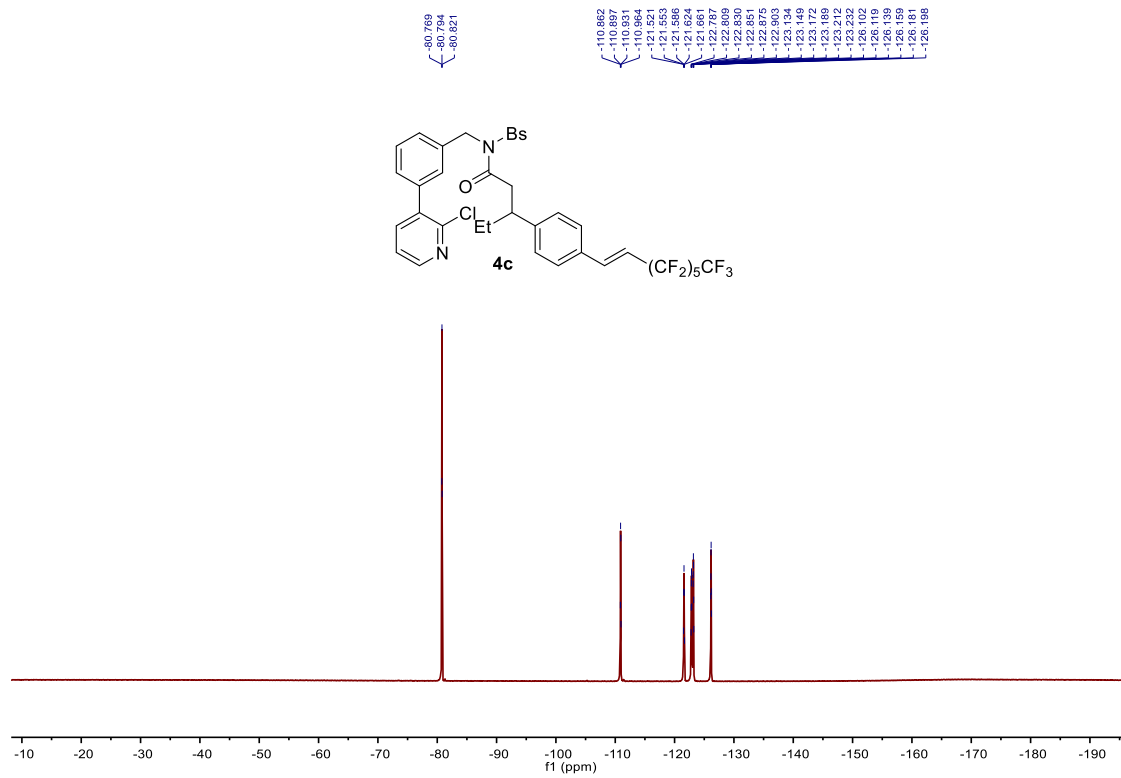

<sup>1</sup>H NMR (400 MHz, Chloroform-*d*)

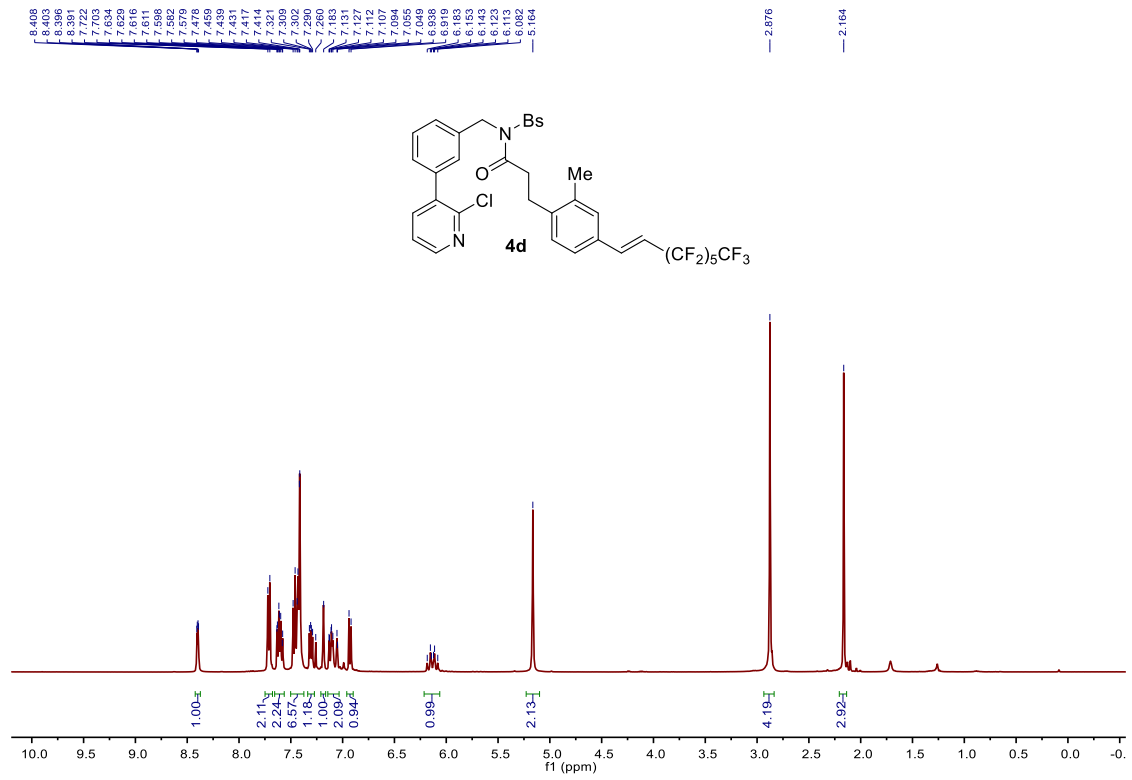

<sup>13</sup>C NMR (101 MHz, Chloroform-*d*)

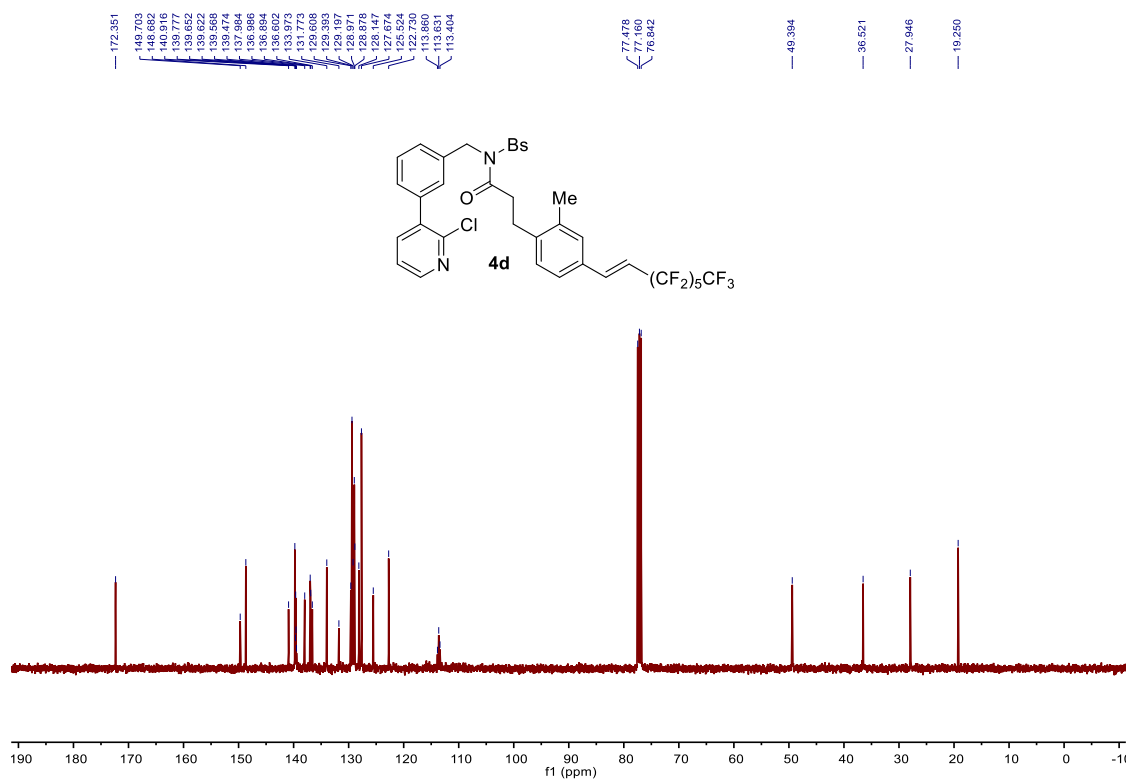



$^{19}\text{F}$  NMR (376 MHz, Chloroform-*d*)

80.764  
80.791  
80.817

110.868  
110.803  
110.837  
110.810  
110.822  
121.552  
121.586  
121.622  
121.652  
122.789  
122.804  
122.816  
122.833  
122.850  
122.866  
122.893  
122.910  
122.927  
123.170  
123.186  
123.210  
123.227  
123.241  
123.271  
126.103  
126.121  
126.141  
126.161  
126.182  
126.199

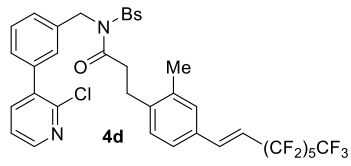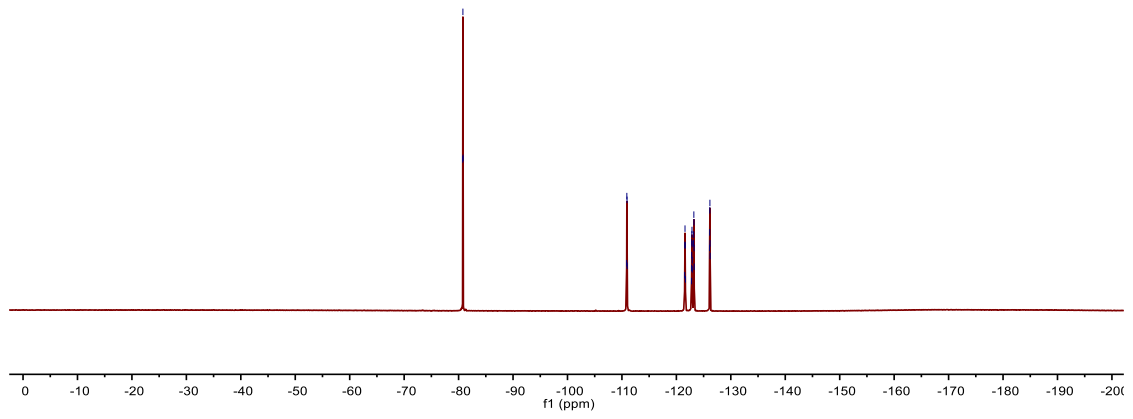

<sup>1</sup>H NMR (400 MHz, Chloroform-*d*)

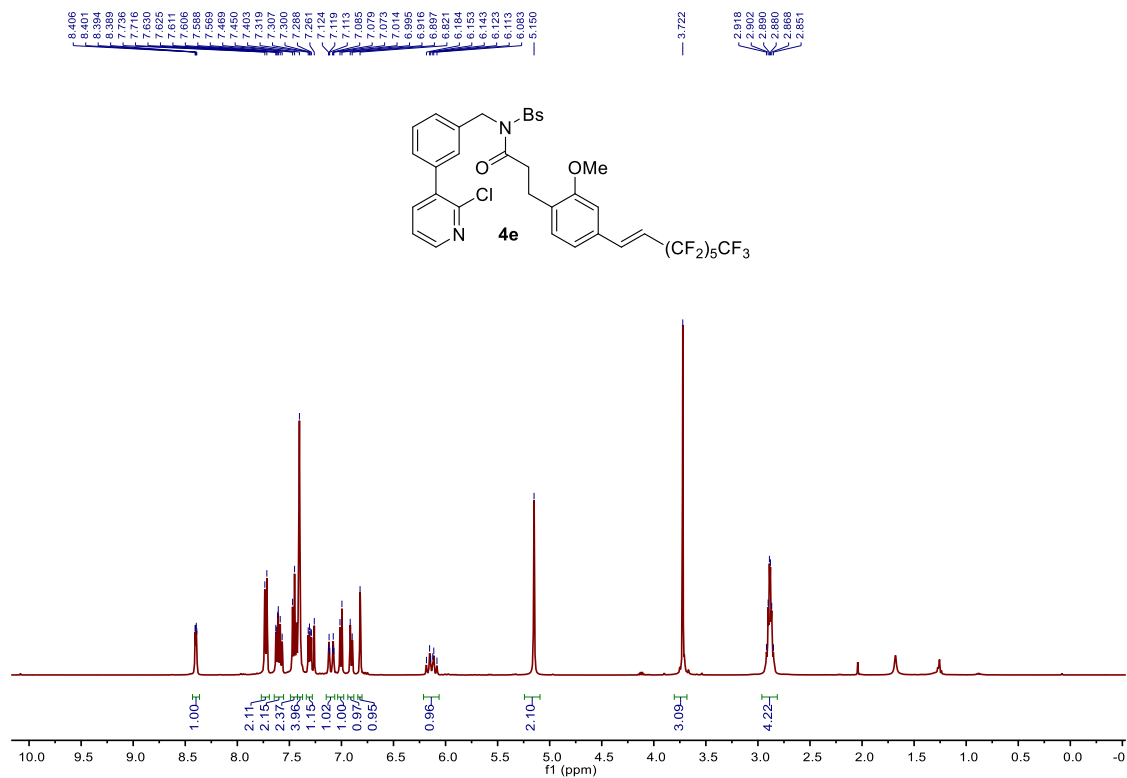

<sup>13</sup>C NMR (101 MHz, Chloroform-*d*)

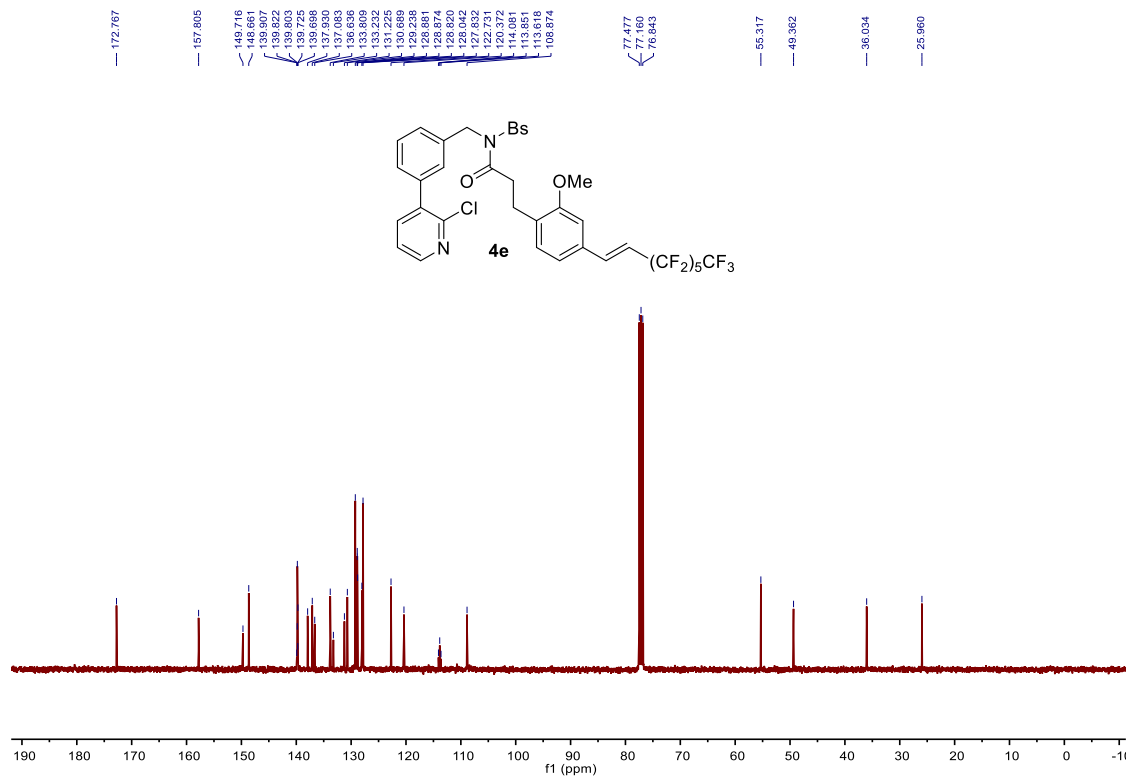

<sup>19</sup>F NMR (376 MHz, Chloroform-*d*)

80.749  
80.776  
80.802

110.835  
110.834  
110.804  
121.547  
121.595  
121.624  
121.624  
122.826  
122.854  
122.885  
122.885  
122.885  
123.109  
123.125  
123.148  
123.148  
126.106  
126.125  
126.144  
126.166  
126.164

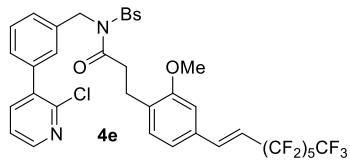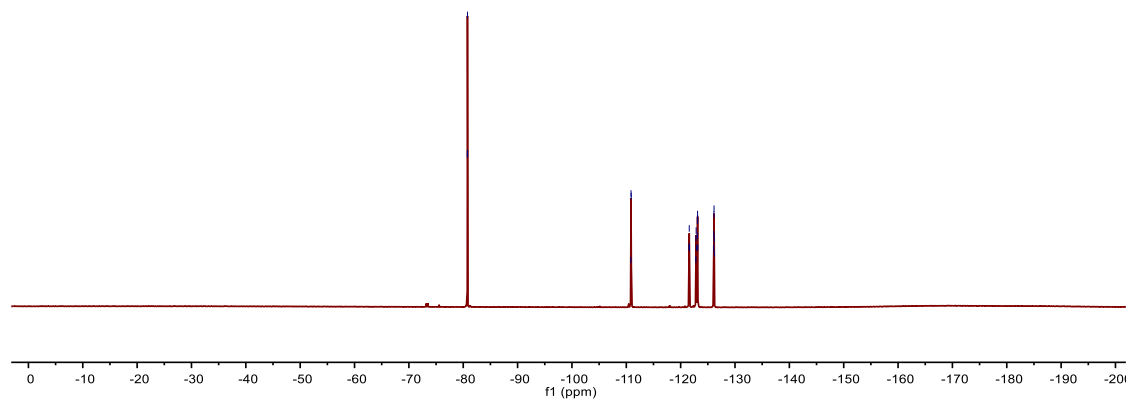

<sup>1</sup>H NMR (400 MHz, Chloroform-*d*)

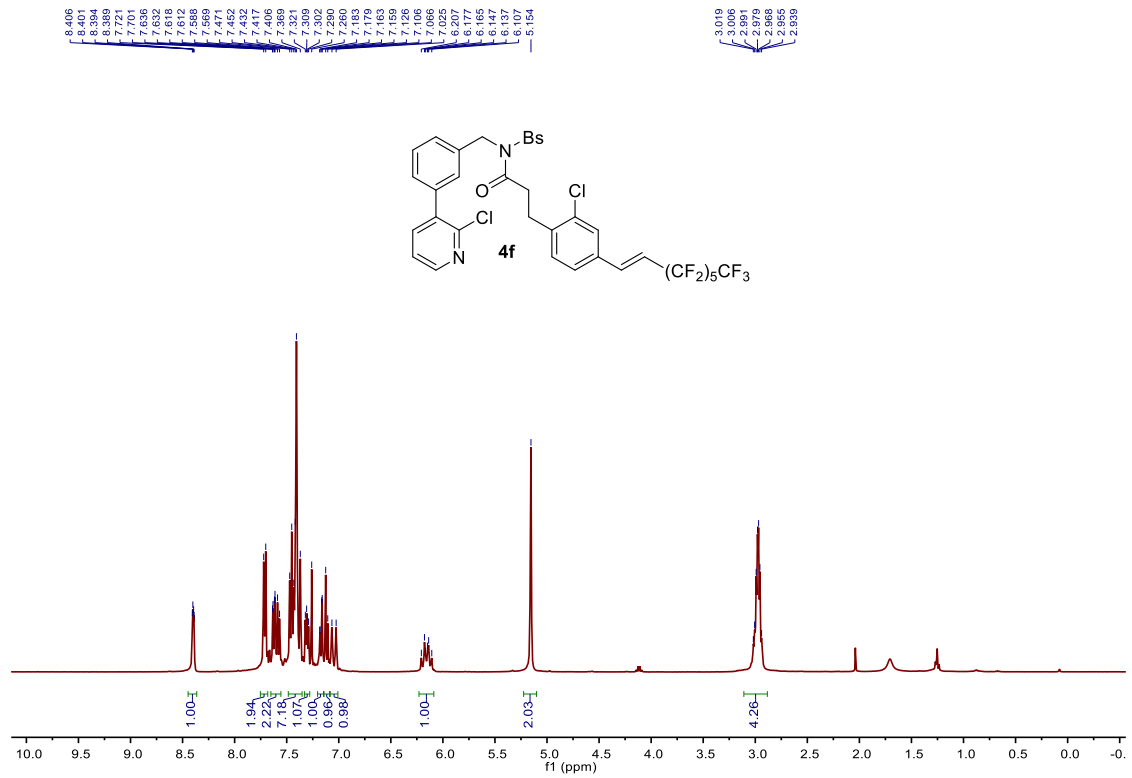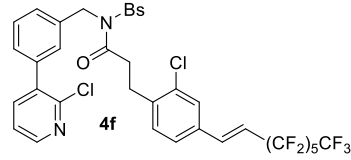

<sup>13</sup>C NMR (101 MHz, Chloroform-*d*)

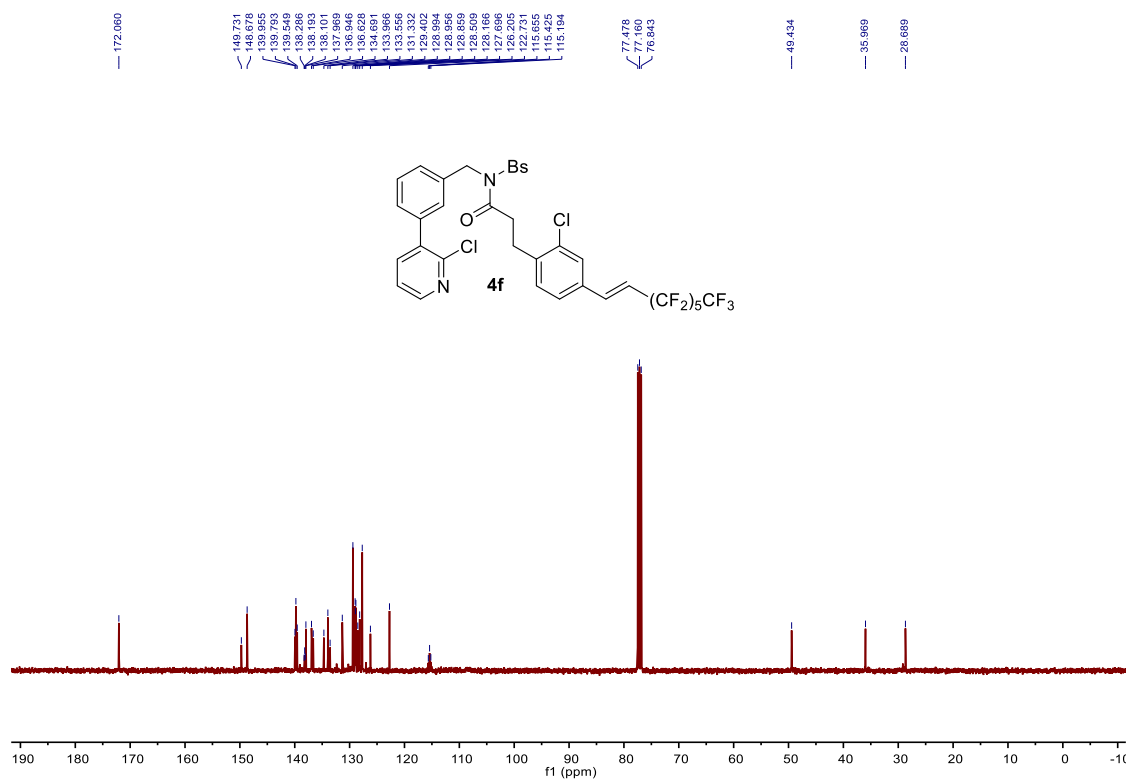

<sup>19</sup>F NMR (376 MHz, Chloroform-*d*)

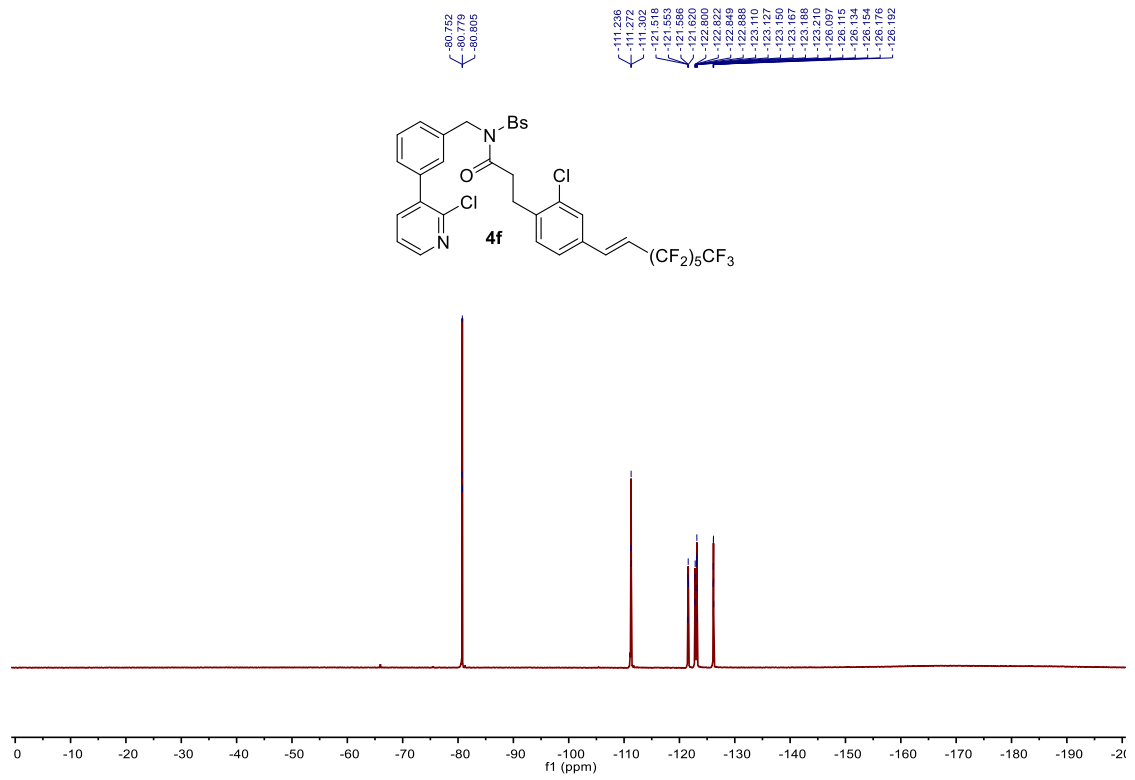



<sup>19</sup>F NMR (376 MHz, Chloroform-*d*)

-80.755  
-80.782  
-80.808

-111.208  
-111.233  
-111.264  
-111.275  
-121.821  
-121.829  
-121.854  
-121.854  
-121.892  
-121.930  
-121.934  
-122.762  
-122.816  
-122.839  
-122.859  
-122.872  
-122.915  
-123.081  
-123.099  
-123.115  
-123.137  
-123.155  
-123.177  
-123.197  
-123.205  
-126.105  
-126.127  
-126.146  
-126.166  
-126.187

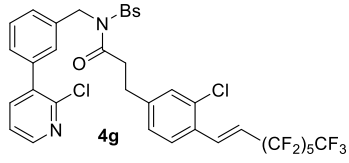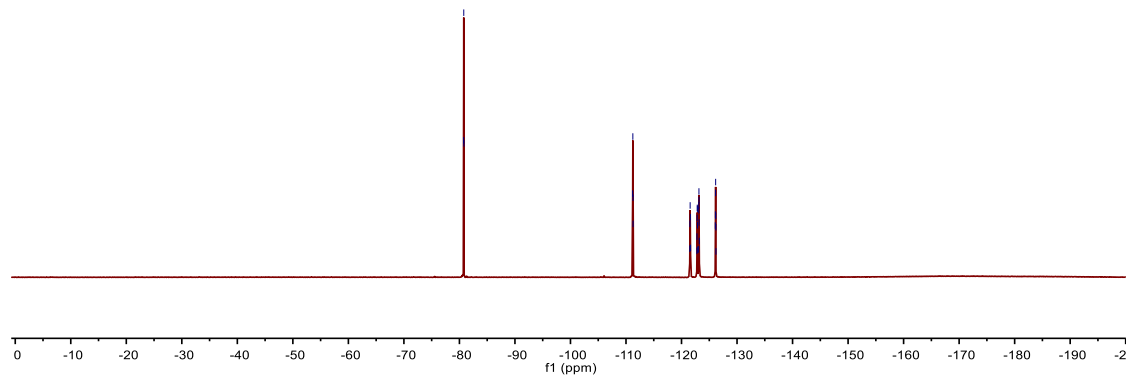

<sup>1</sup>H NMR (400 MHz, Chloroform-*d*)

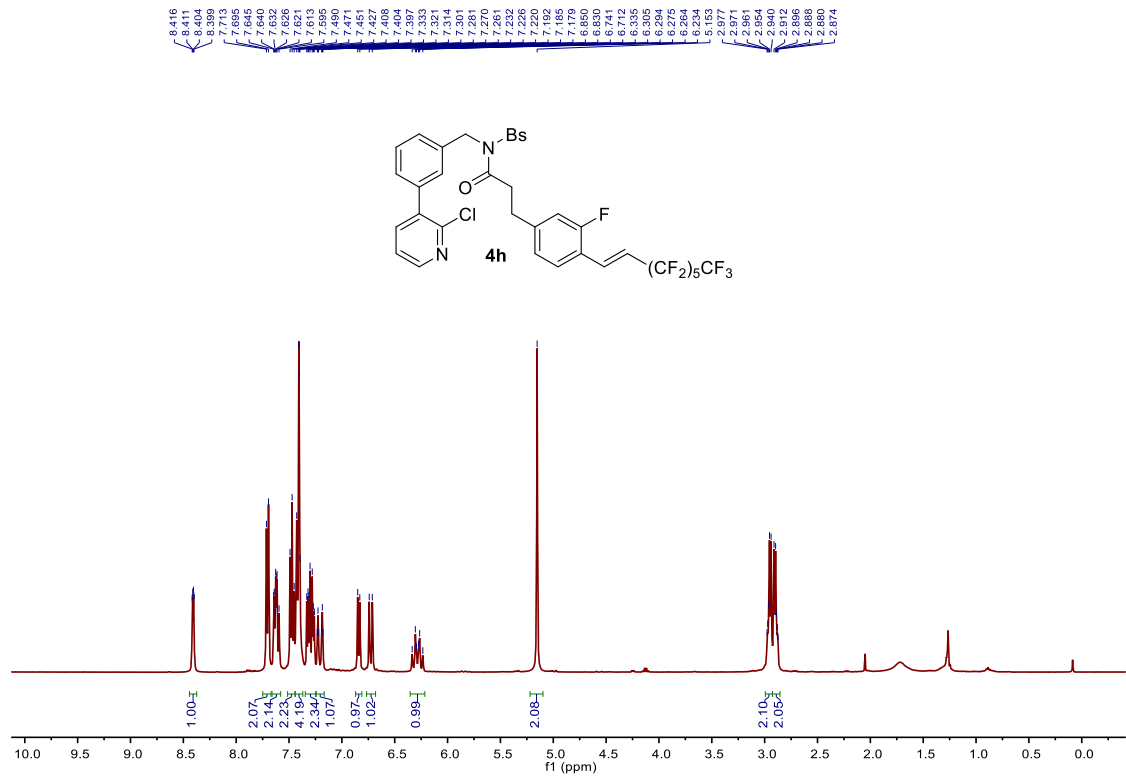

<sup>13</sup>C NMR (101 MHz, Chloroform-*d*)

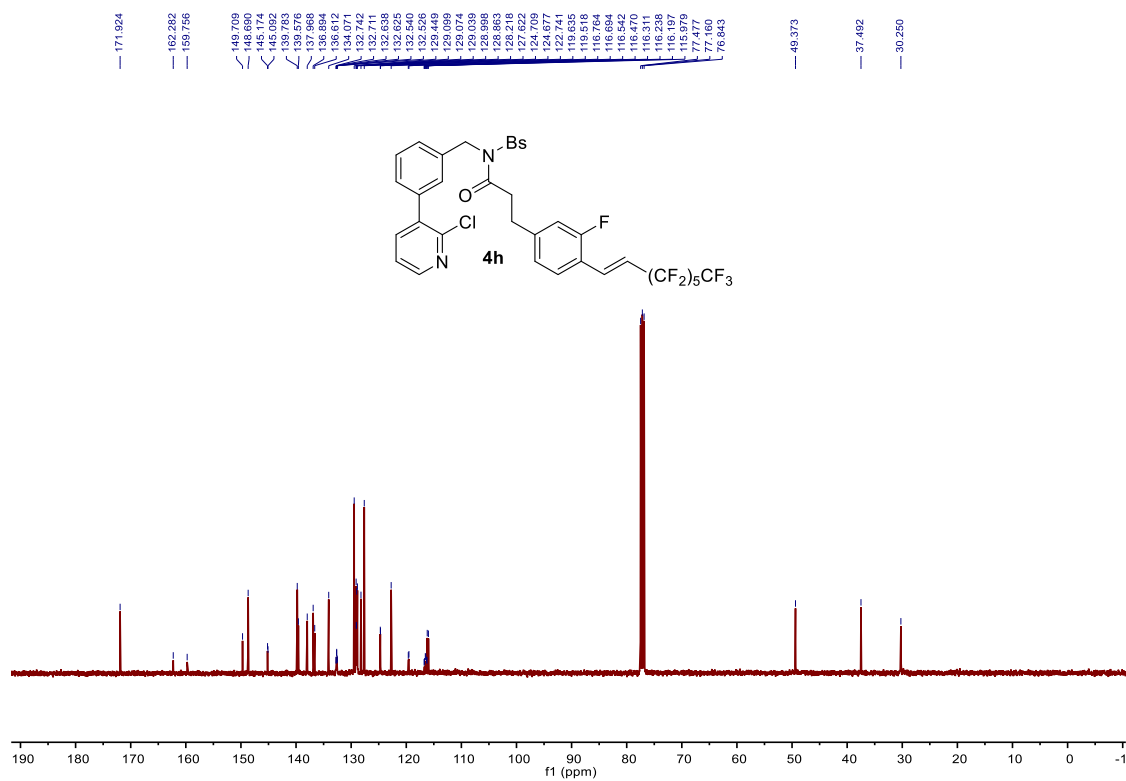



<sup>19</sup>F NMR (376 MHz, Chloroform-*d*)

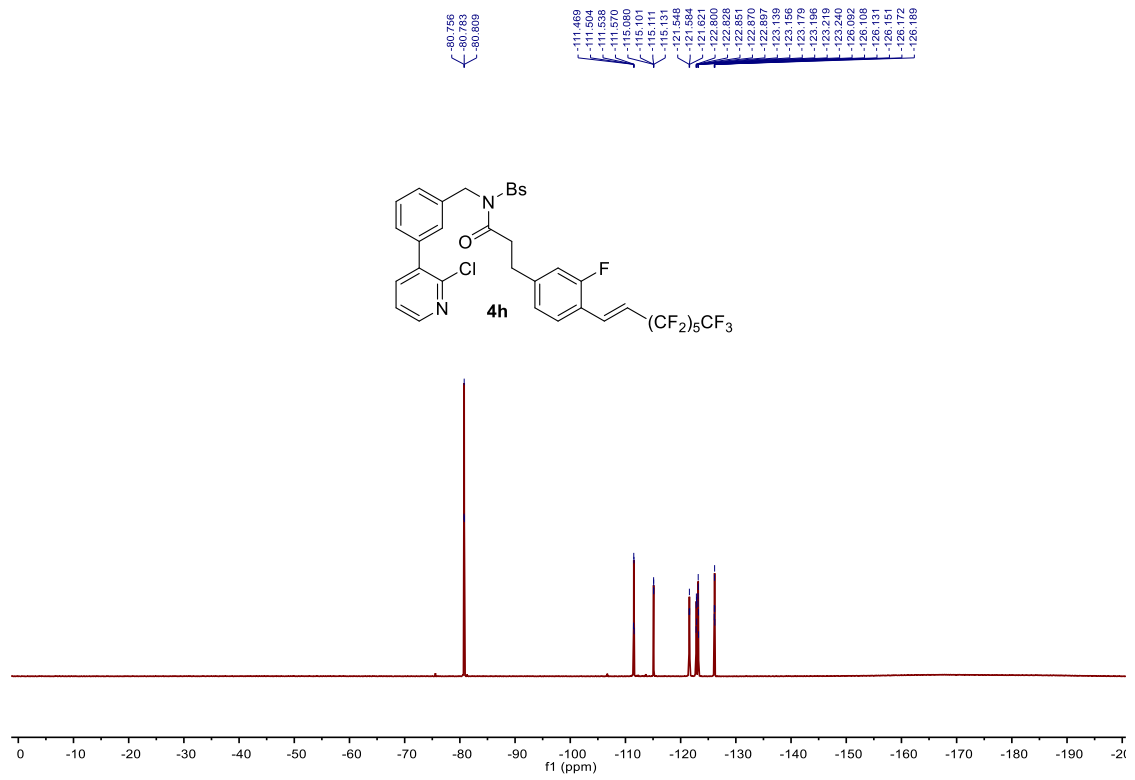

# <sup>1</sup>H NMR (400 MHz, Chloroform-*d*)

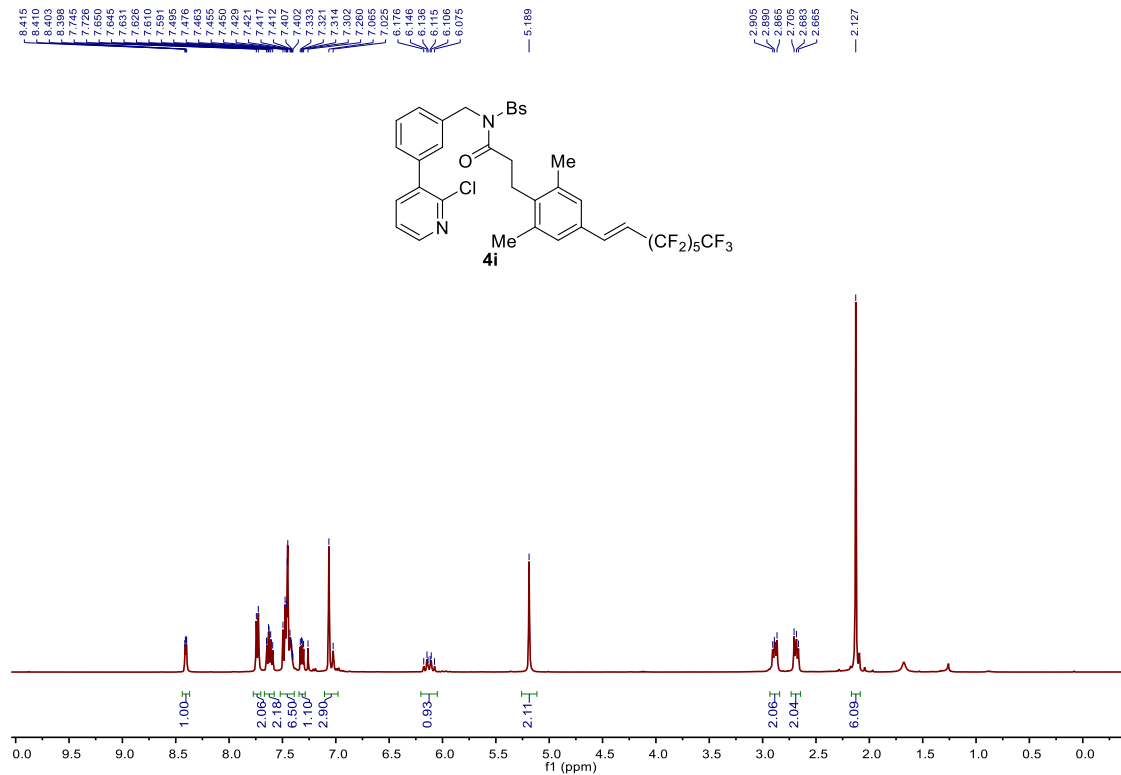

# <sup>13</sup>C NMR (101 MHz, Chloroform-*d*)

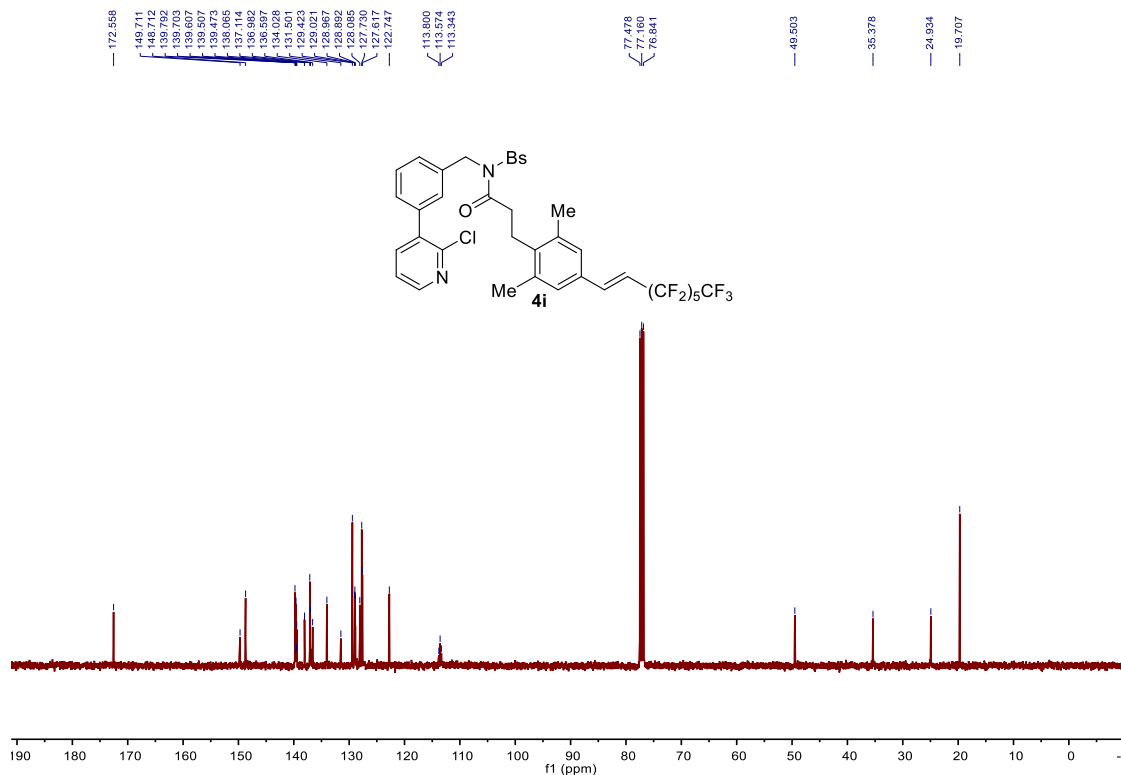

<sup>19</sup>F NMR (376 MHz, Chloroform-*d*)

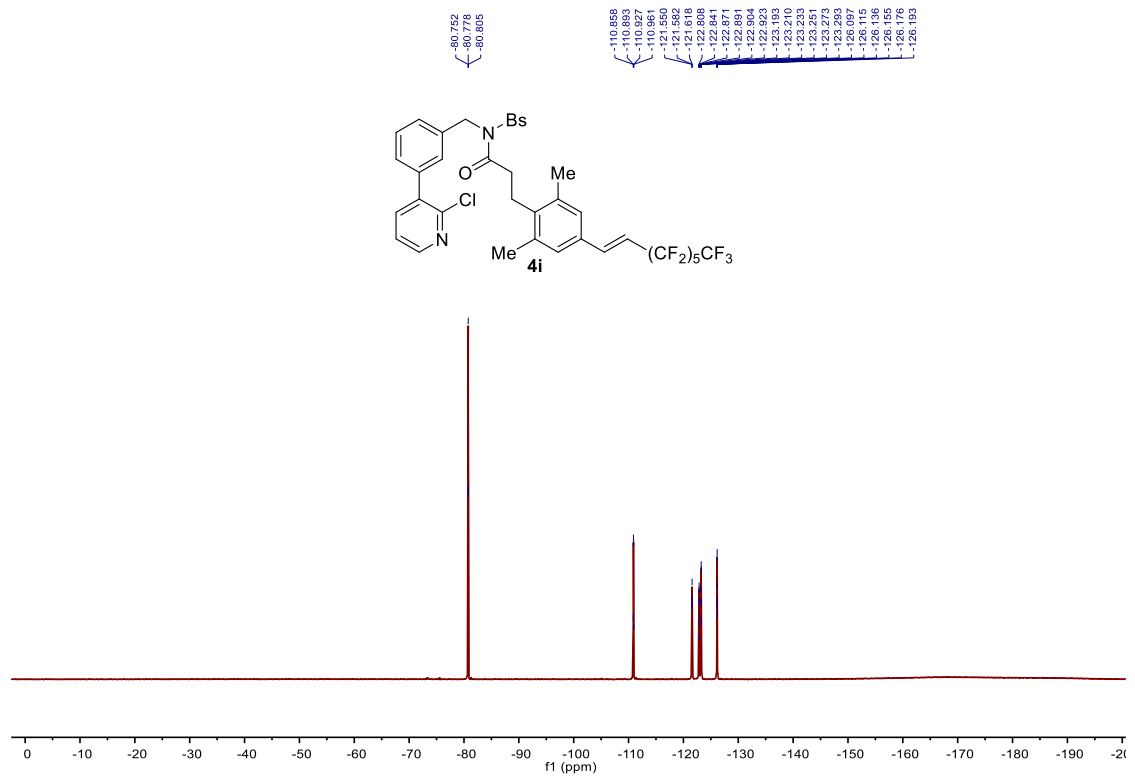

<sup>1</sup>H NMR (400 MHz, Chloroform-*d*)

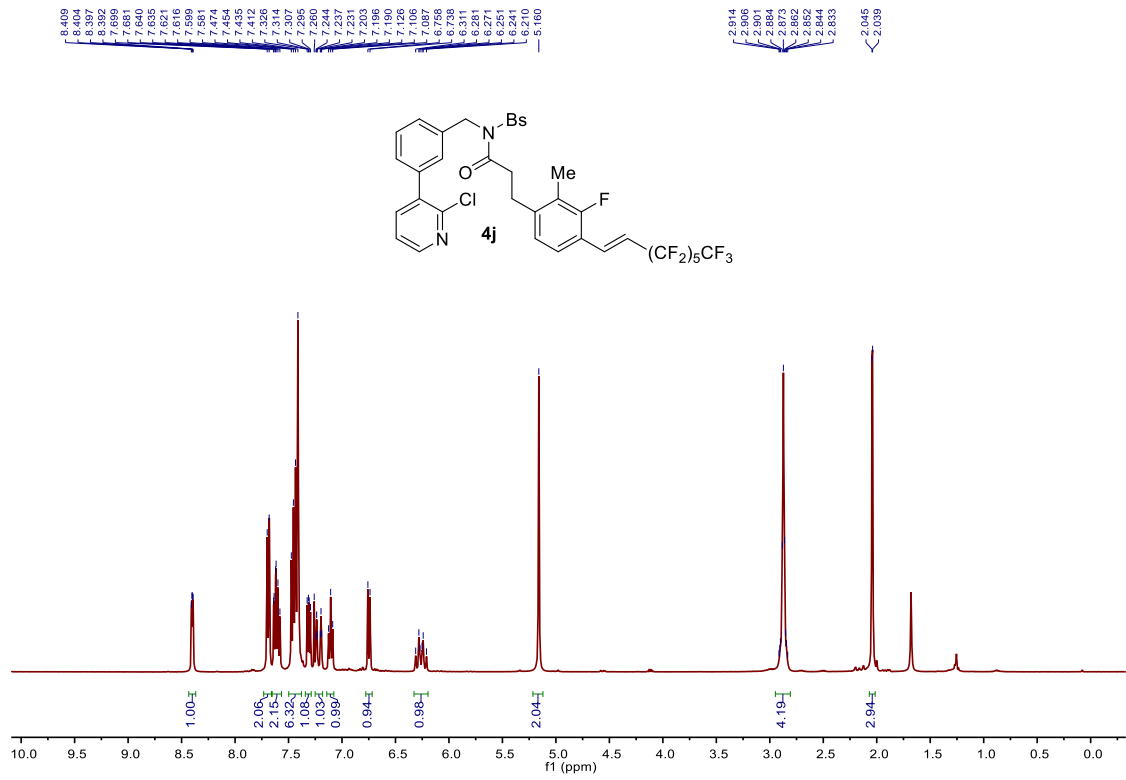

<sup>13</sup>C NMR (101 MHz, Chloroform-*d*)

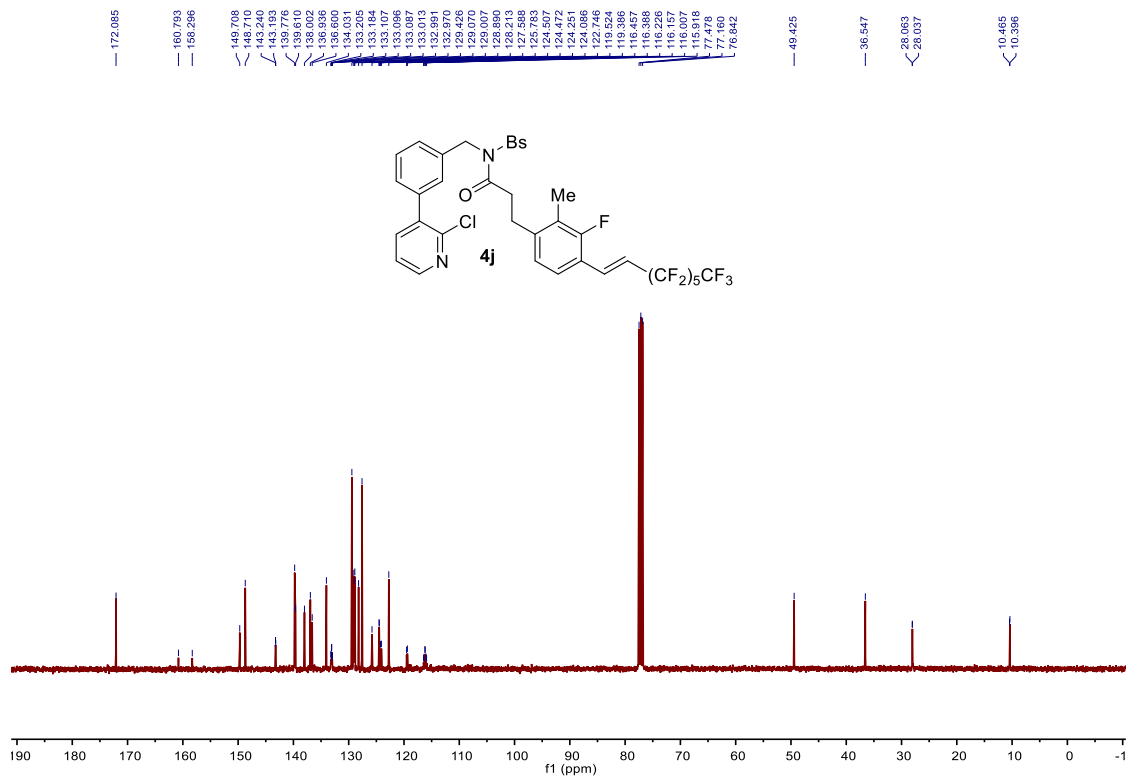

<sup>19</sup>F NMR (376 MHz, Chloroform-*d*)

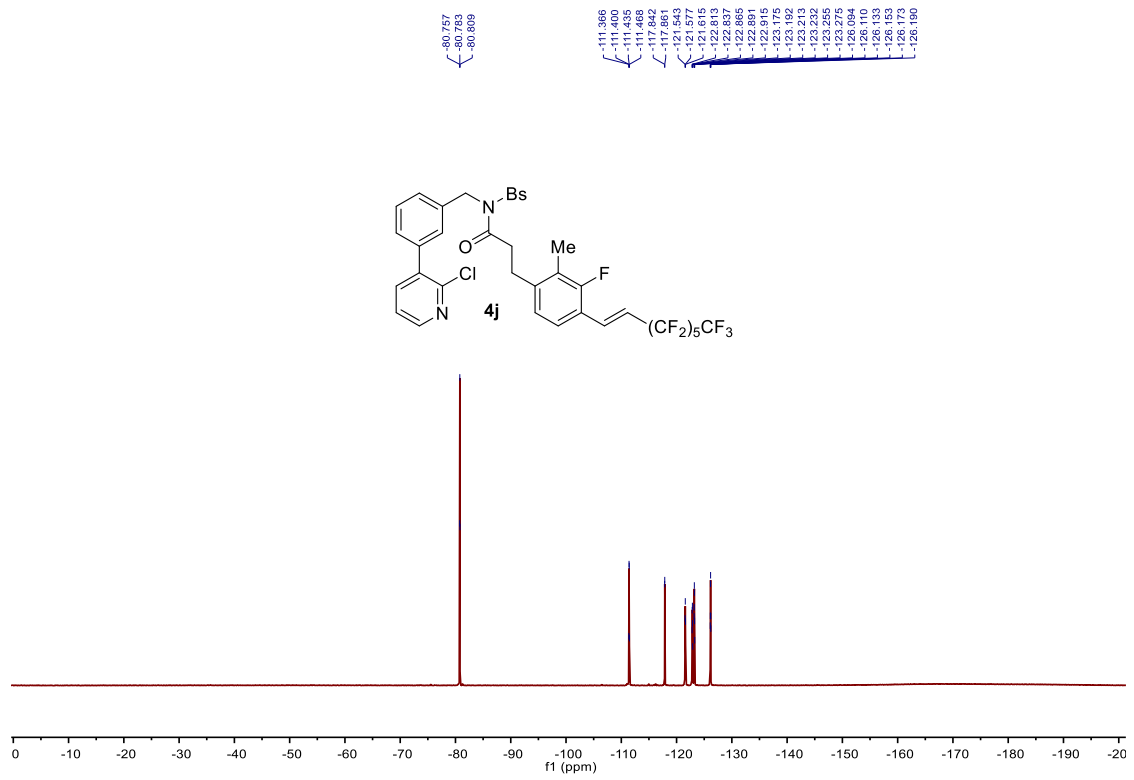

<sup>1</sup>H NMR (400 MHz, Chloroform-*d*)

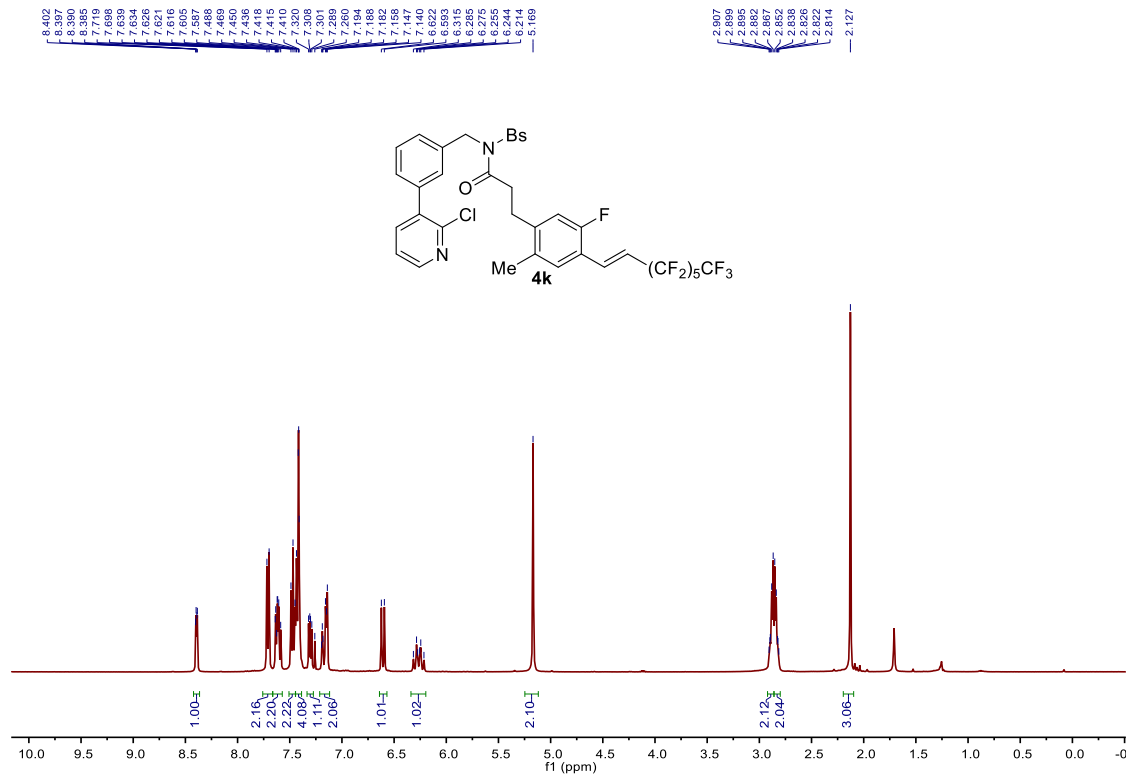

<sup>13</sup>C NMR (101 MHz, Chloroform-*d*)

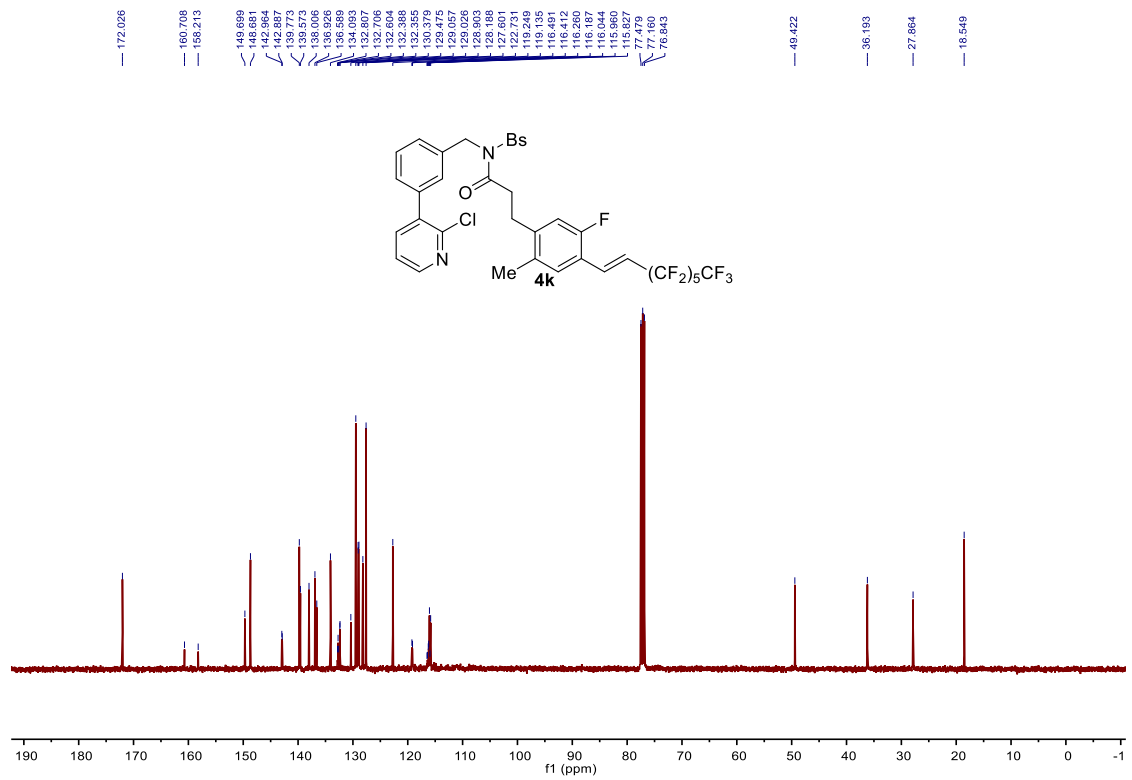

<sup>19</sup>F NMR (376 MHz, Chloroform-*d*)

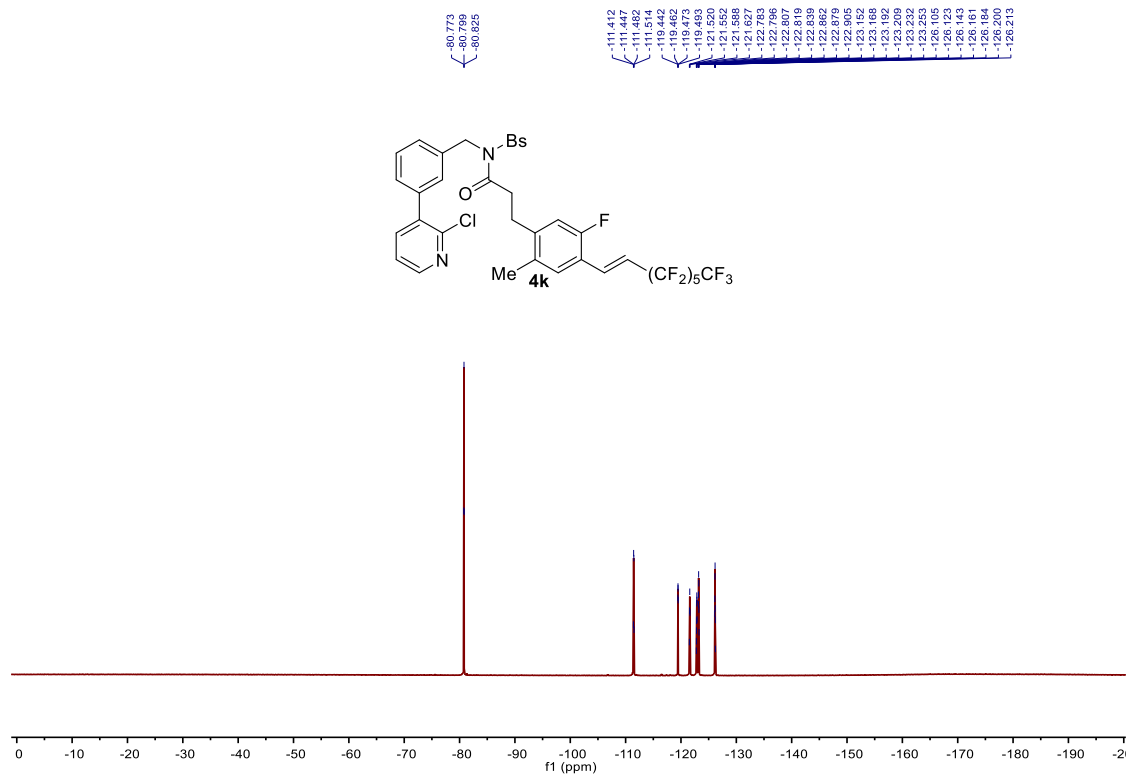

<sup>1</sup>H NMR (400 MHz, Chloroform-*d*)

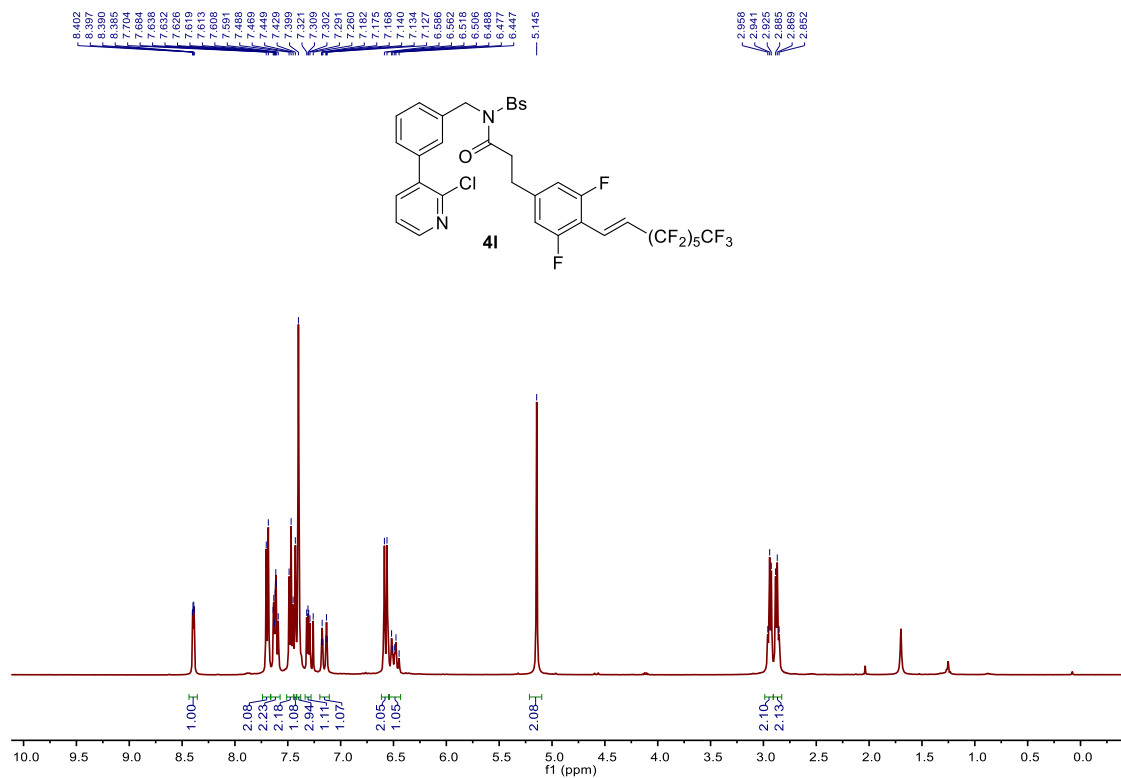

<sup>13</sup>C NMR (101 MHz, Chloroform-*d*)

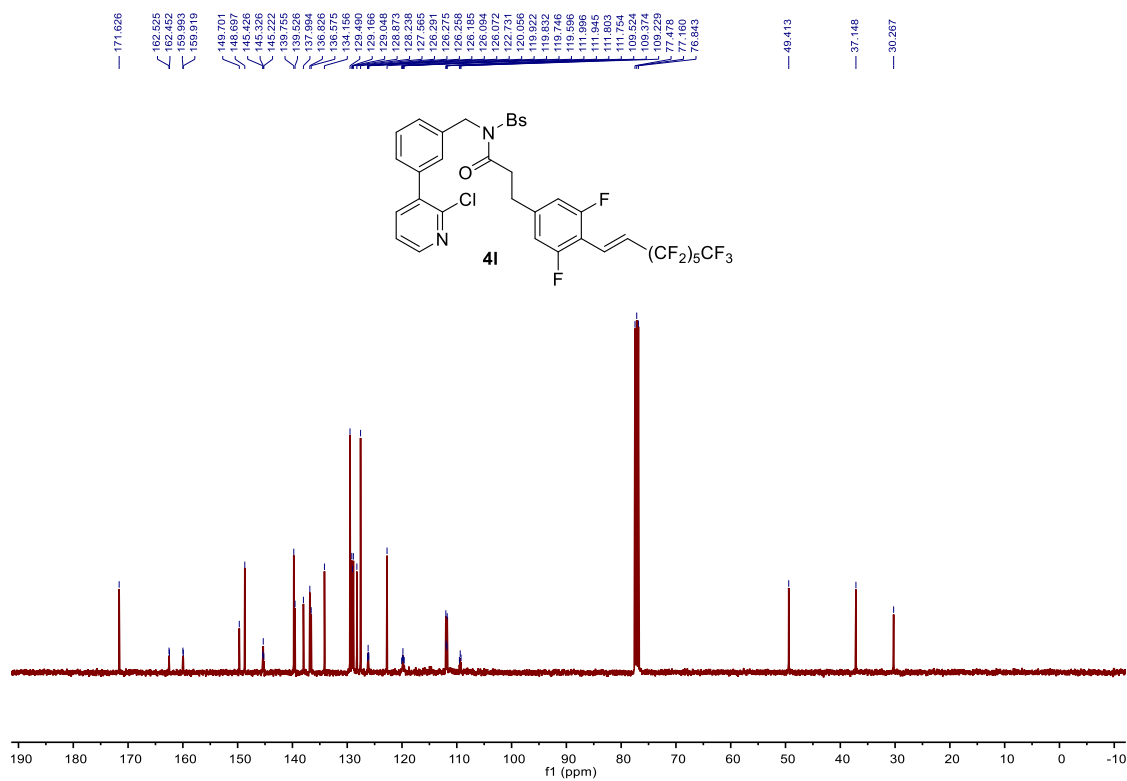



$^{19}\text{F}$  NMR (376 MHz, Chloroform-*d*)

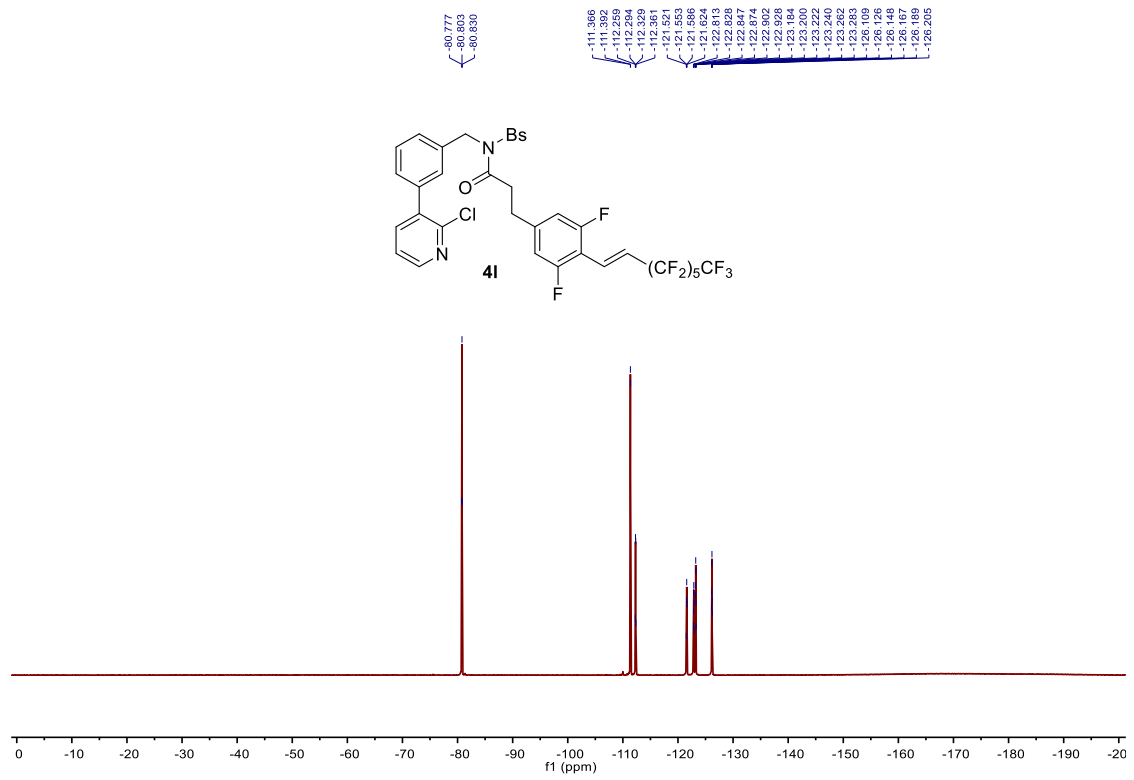

<sup>1</sup>H NMR (400 MHz, Chloroform-*d*)

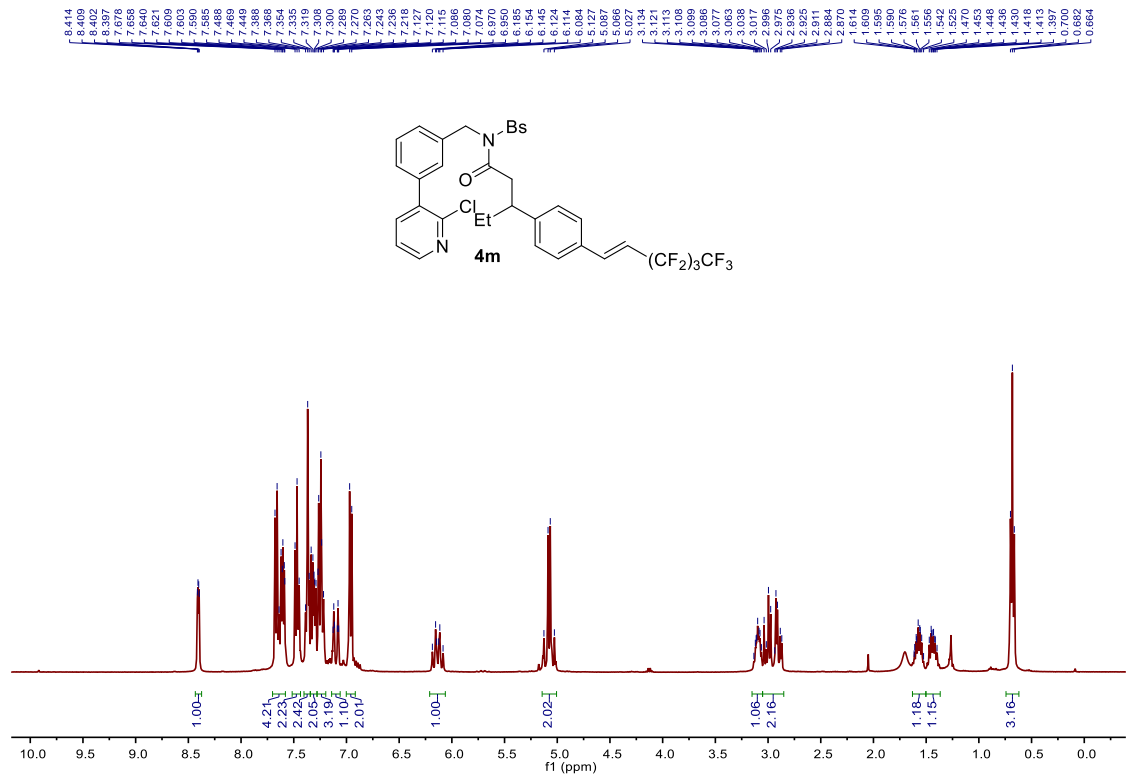

<sup>13</sup>C NMR (101 MHz, Chloroform-*d*)

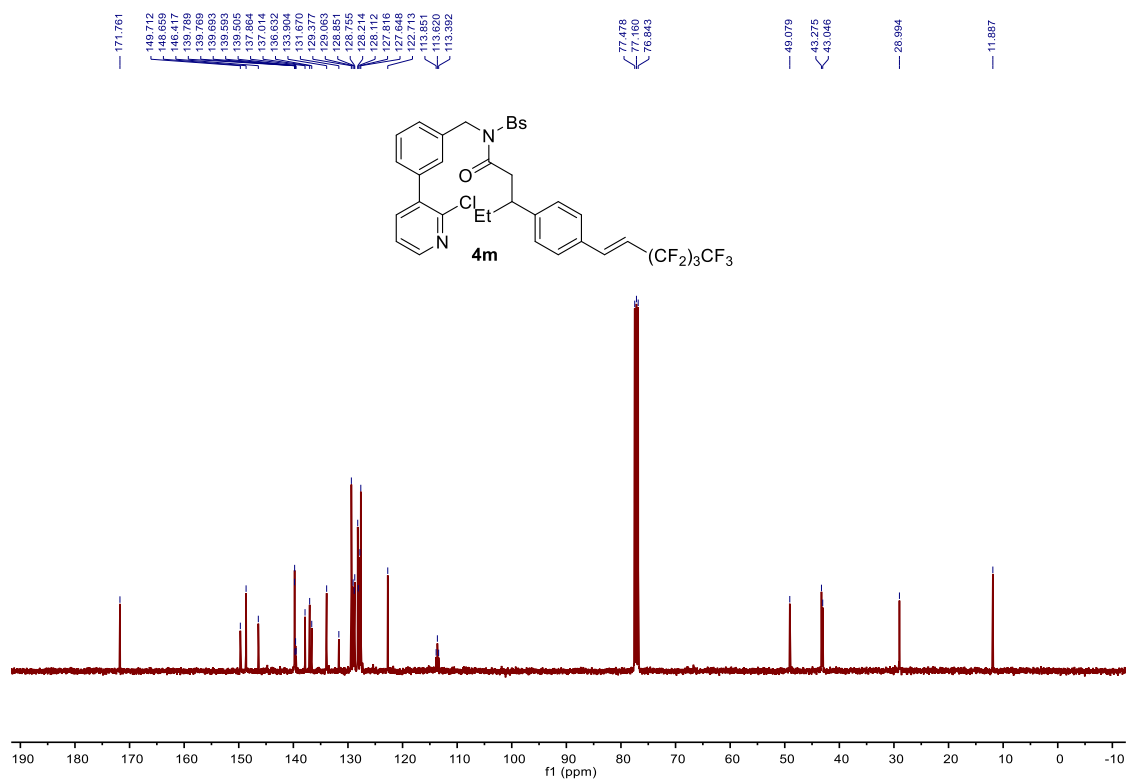

<sup>19</sup>F NMR (376 MHz, Chloroform-*d*)

-80.975  
-80.982  
-81.001  
-81.028  
-81.035

-111.085  
-111.118  
-111.150  
-111.183  
-111.215  
-124.024  
-124.055  
-124.086  
-125.827  
-125.857  
-125.876  
-125.890  
-125.919  
-125.934

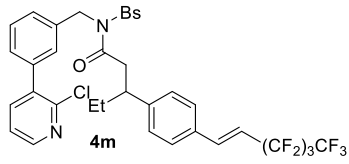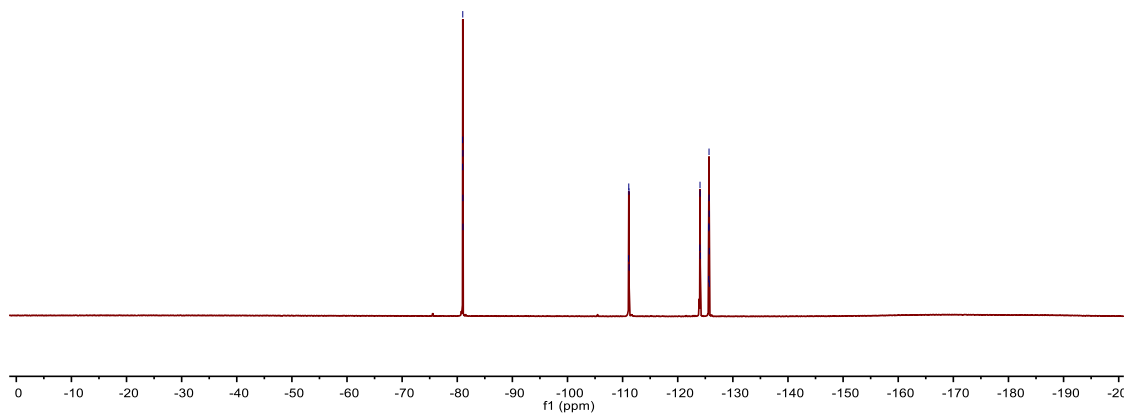

<sup>1</sup>H NMR (400 MHz, Chloroform-*d*)

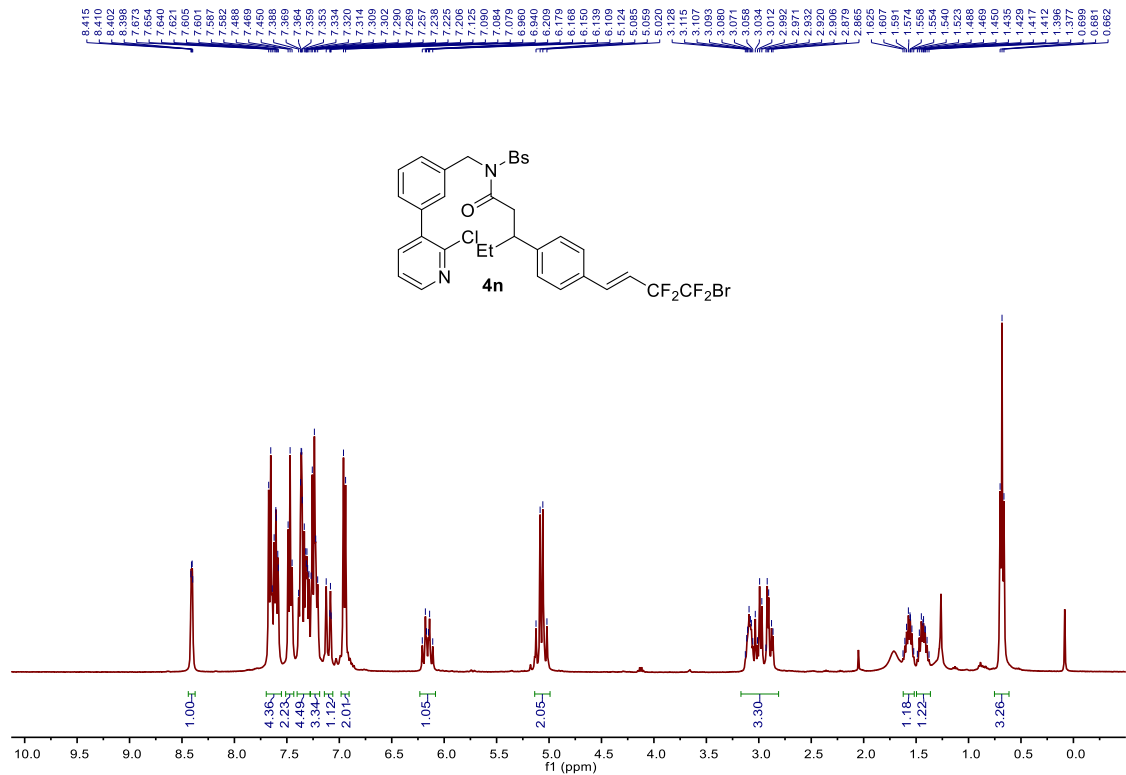

<sup>13</sup>C NMR (101 MHz, Chloroform-*d*)

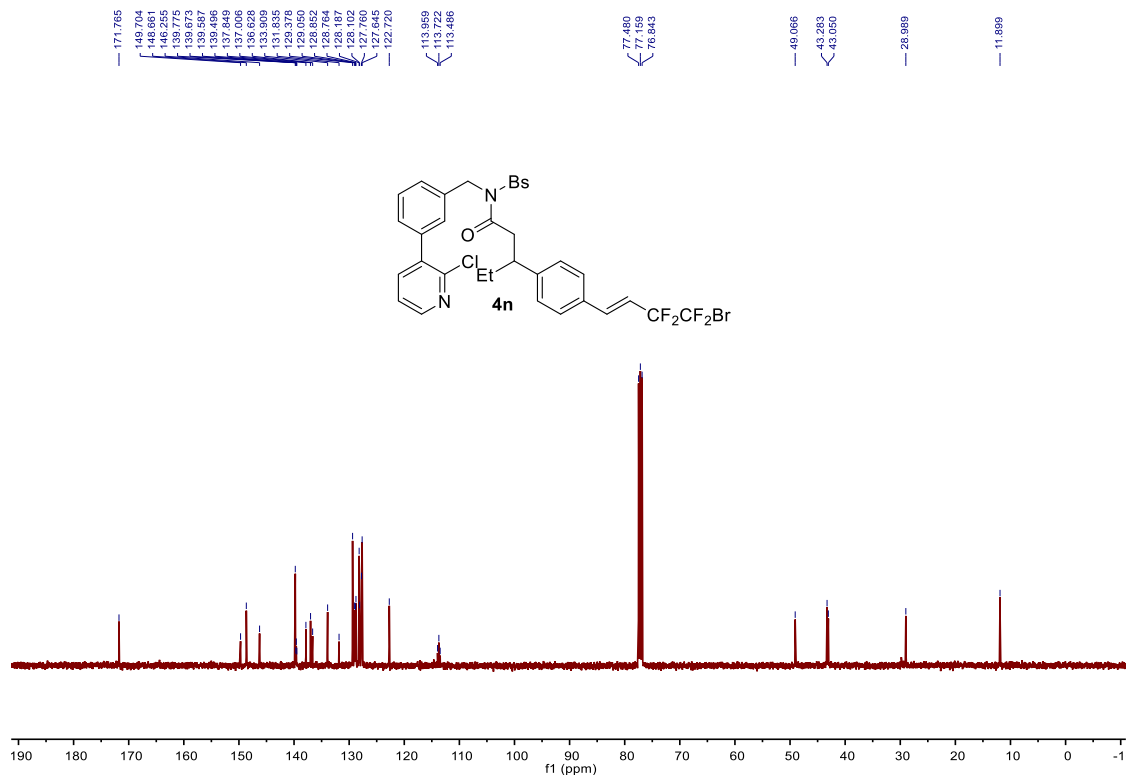

$^{19}\text{F}$  NMR (376 MHz, Chloroform-*d*)

-66.911  
-66.905  
-66.895

-108.840  
-108.857  
-108.873  
-108.898

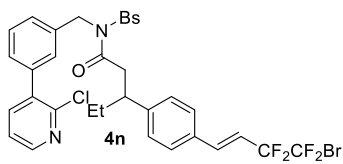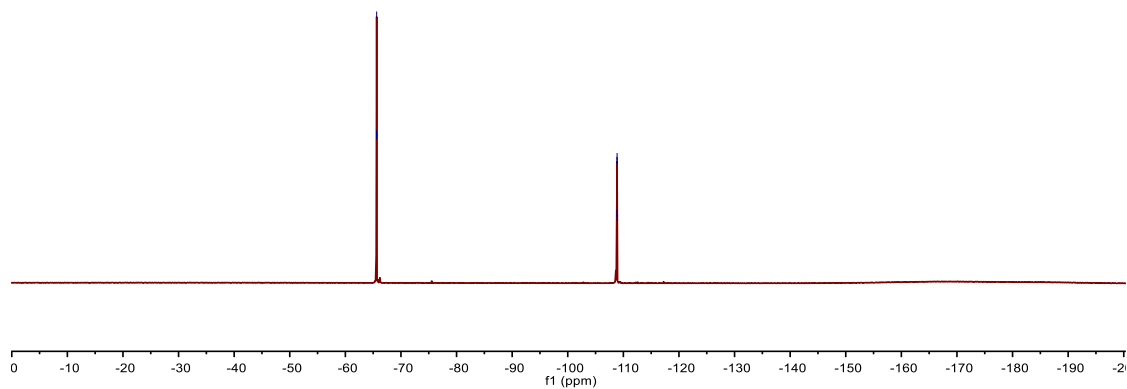

# <sup>1</sup>H NMR (400 MHz, Chloroform-*d*)

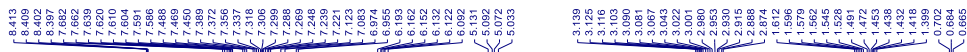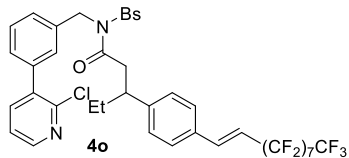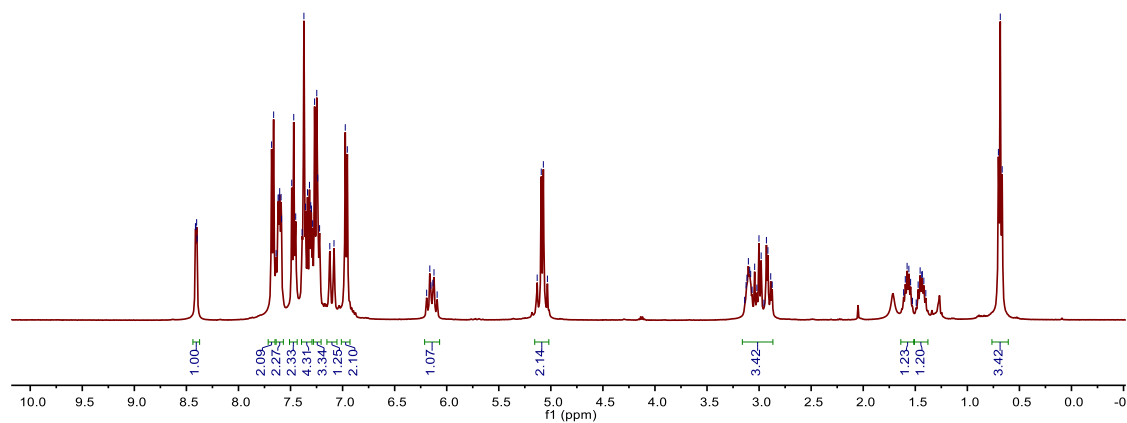

# <sup>13</sup>C NMR (101 MHz, Chloroform-*d*)

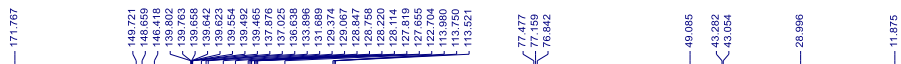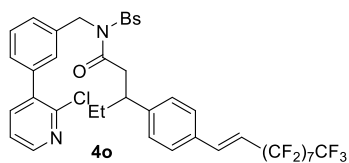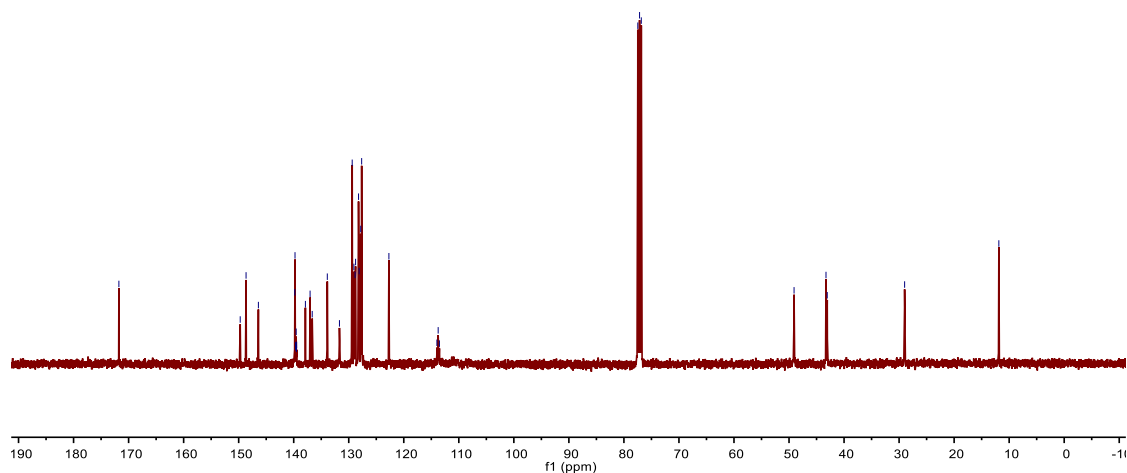

$^{19}\text{F}$  NMR (376 MHz, Chloroform-*d*)

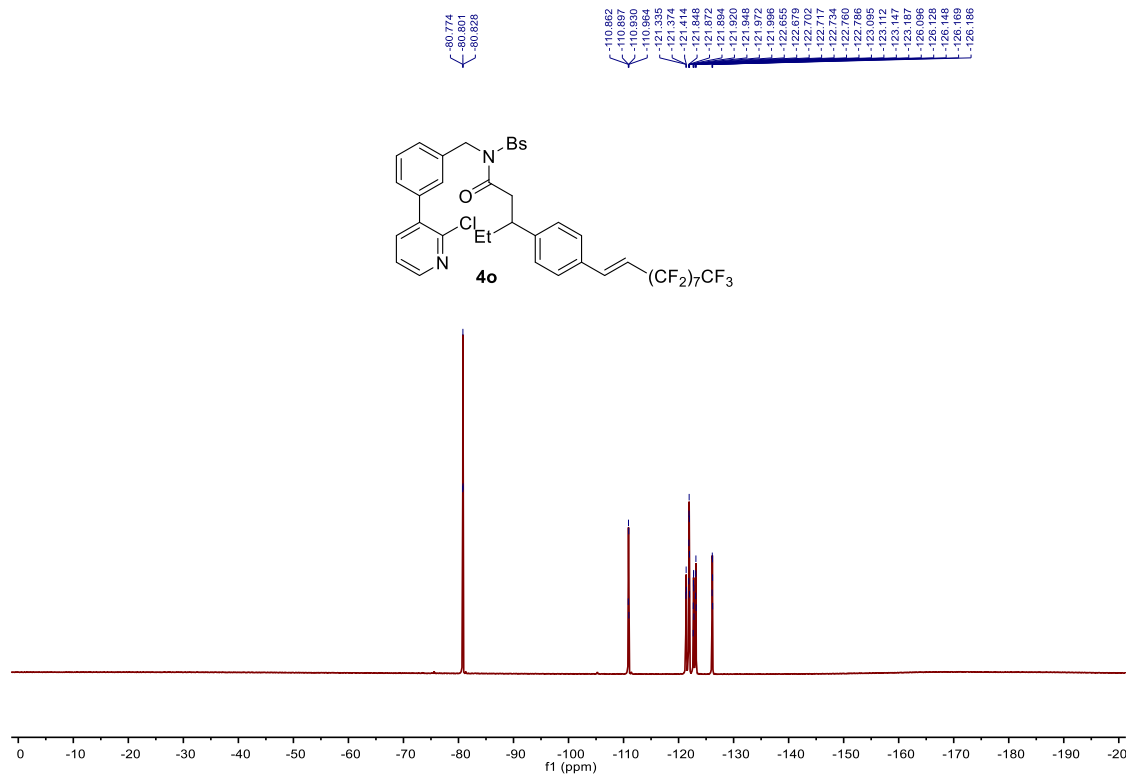

<sup>1</sup>H NMR (400 MHz, Chloroform-*d*)

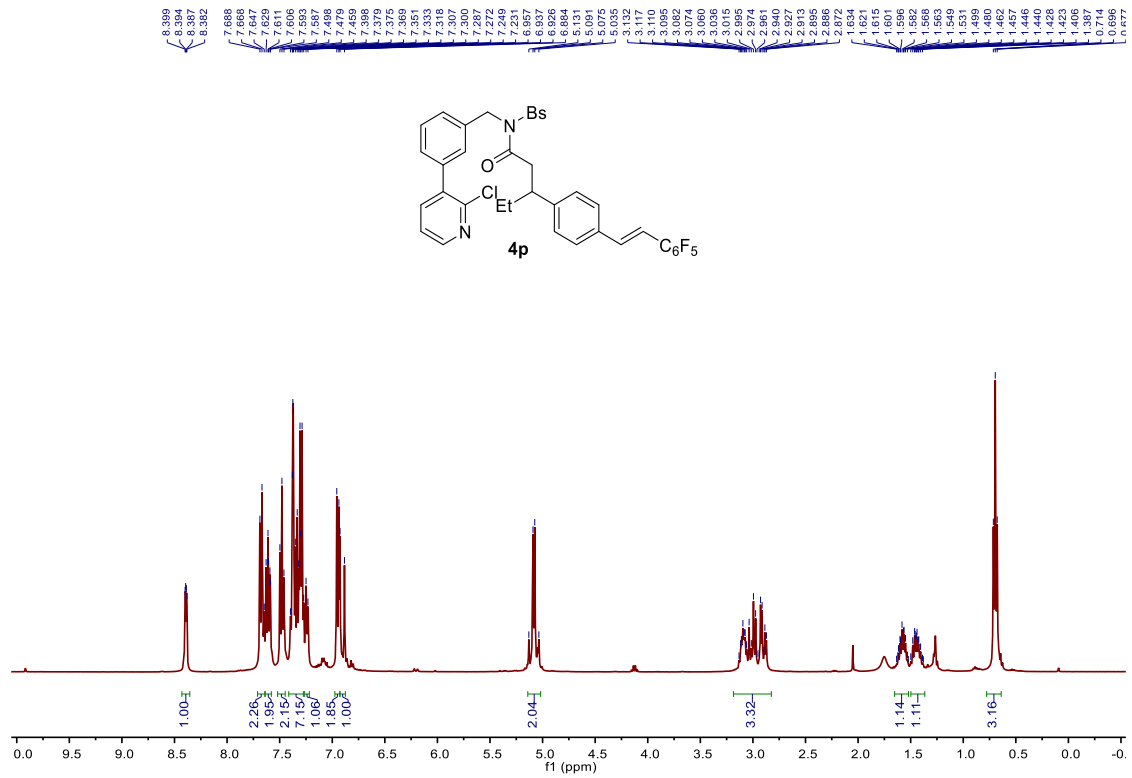

<sup>13</sup>C NMR (101 MHz, Chloroform-*d*)

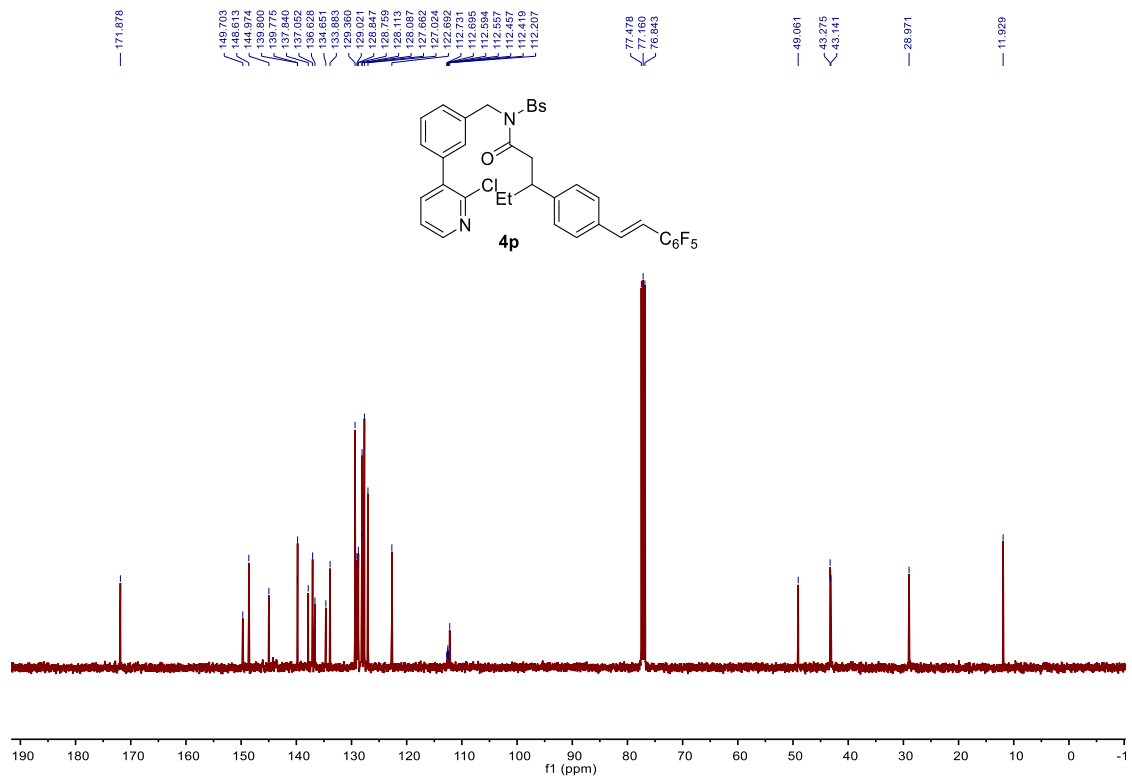





<sup>1</sup>H NMR (400 MHz, Chloroform-*d*)

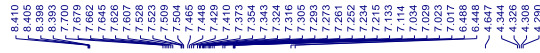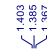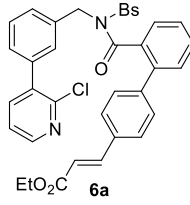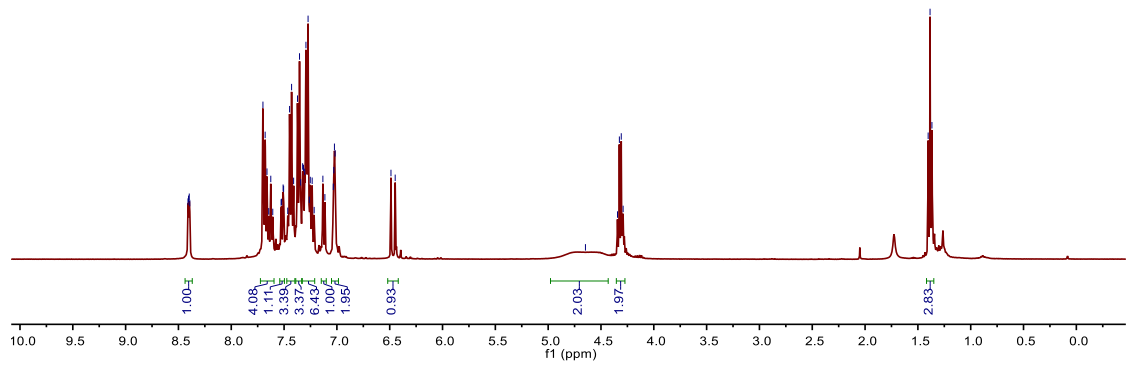

<sup>13</sup>C NMR (101 MHz, Chloroform-*d*)

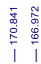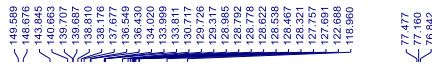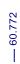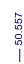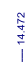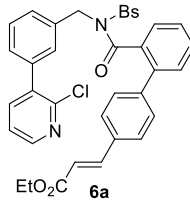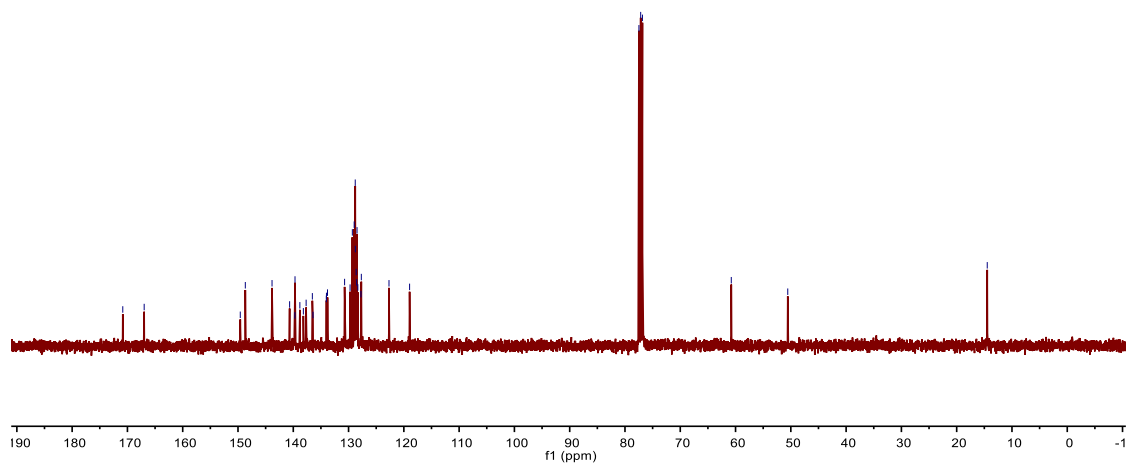

<sup>1</sup>H NMR (400 MHz, Chloroform-*d*)

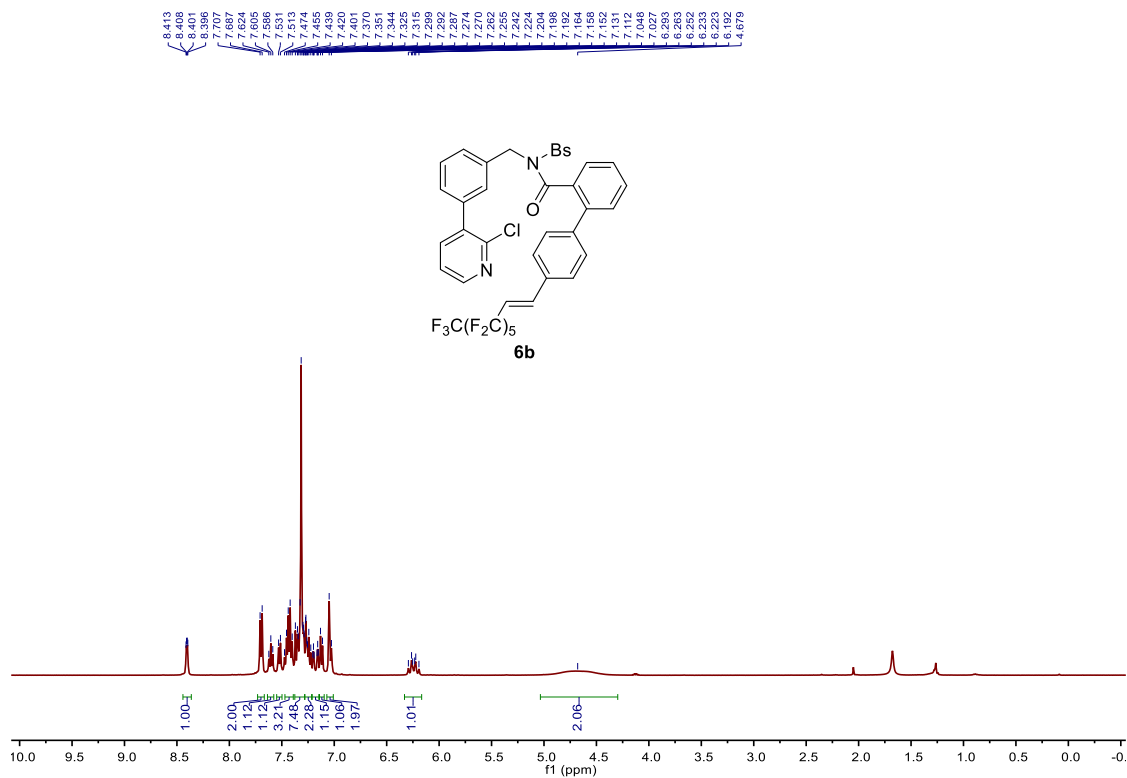

<sup>13</sup>C NMR (101 MHz, Chloroform-*d*)

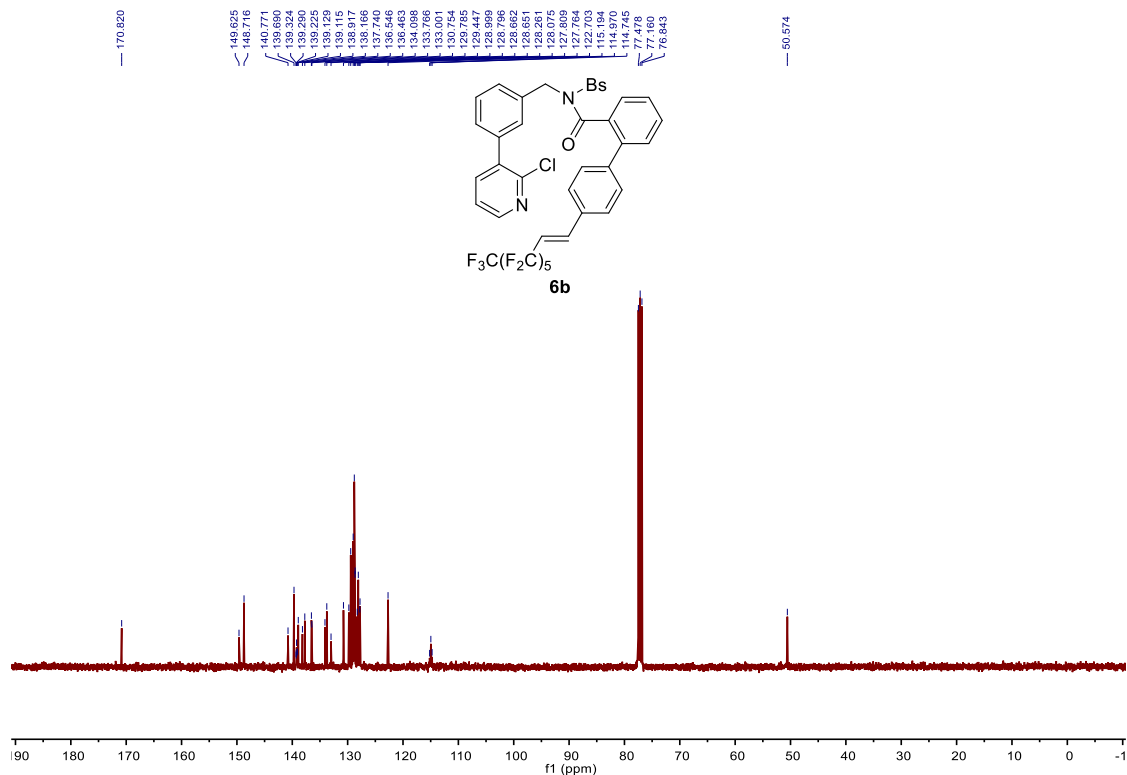

<sup>19</sup>F NMR (376 MHz, Chloroform-*d*)

← -80.713  
← -80.738  
← -80.765

← -110.862  
← -110.886  
← -111.030  
← -111.063  
← -121.450  
← -121.526  
← -121.560  
← -121.688  
← -122.789  
← -122.842  
← -122.864  
← -122.880  
← -123.003  
← -123.027  
← -126.043  
← -126.059  
← -126.080  
← -126.101  
← -126.121  
← -126.139

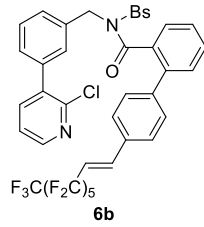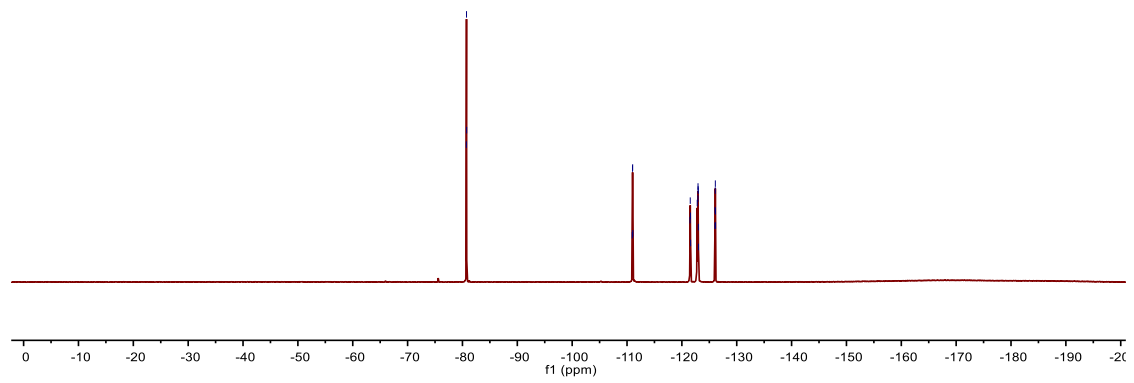

<sup>1</sup>H NMR (400 MHz, Chloroform-*d*)

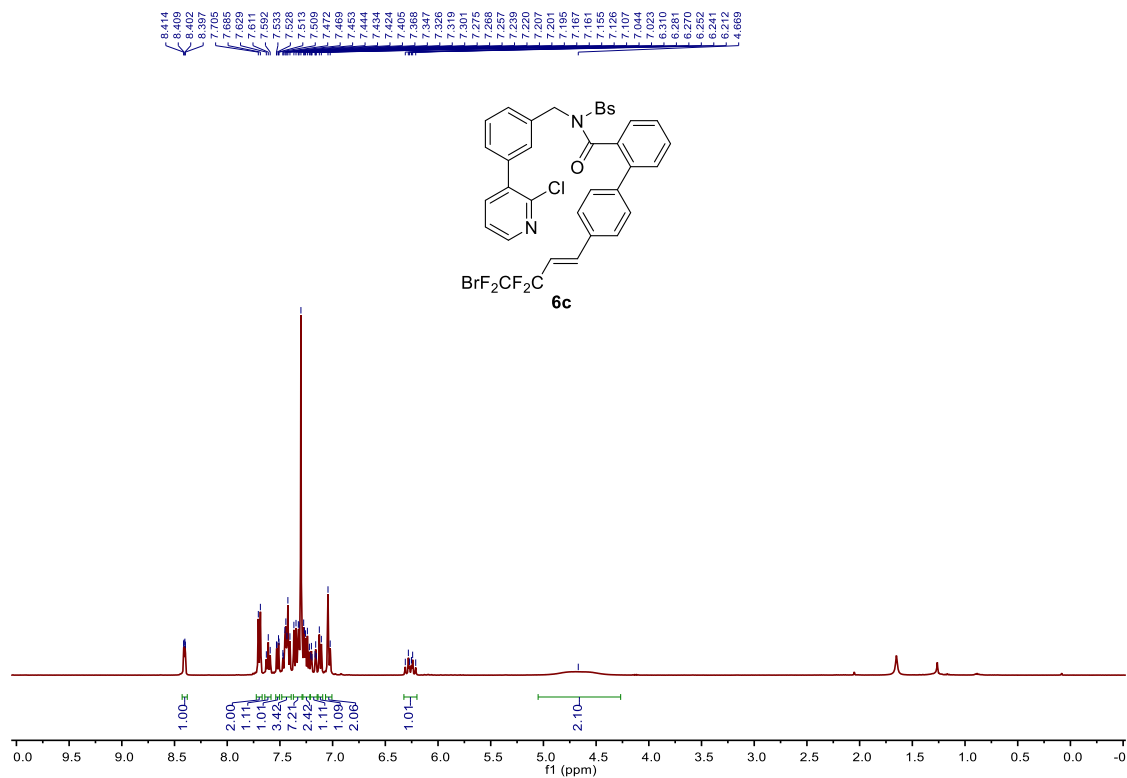

<sup>13</sup>C NMR (101 MHz, Chloroform-*d*)

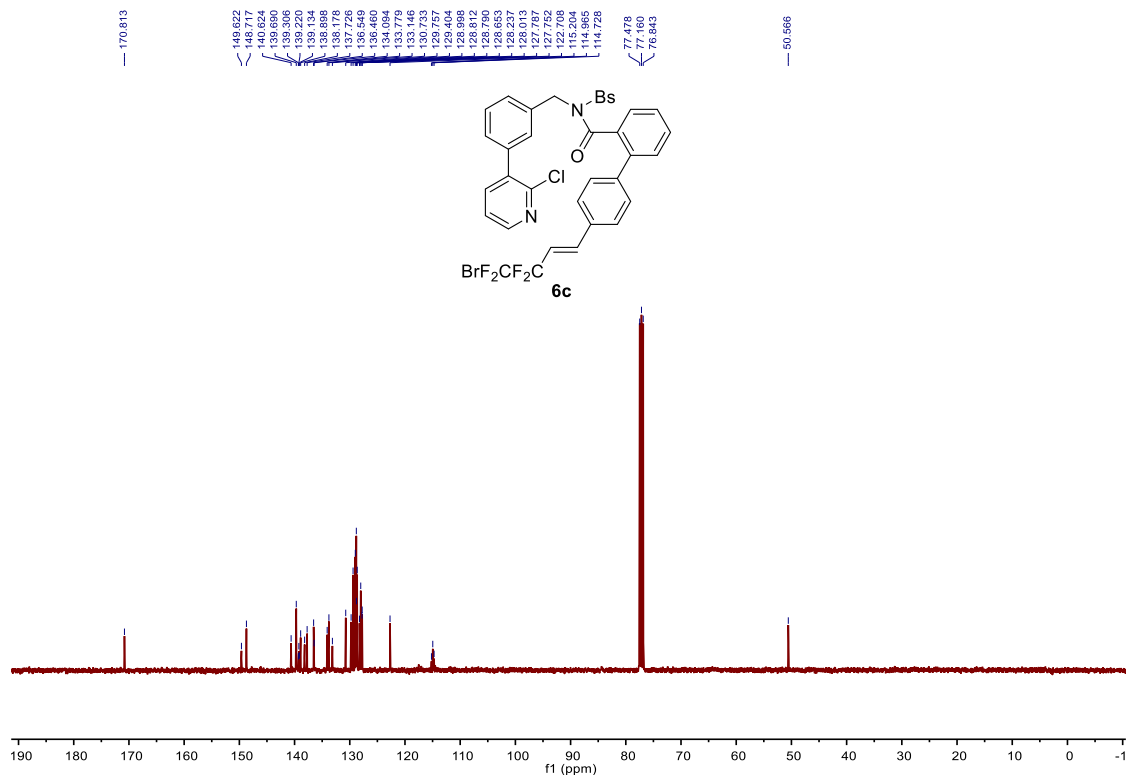

$^{19}\text{F}$  NMR (376 MHz, Chloroform-*d*)

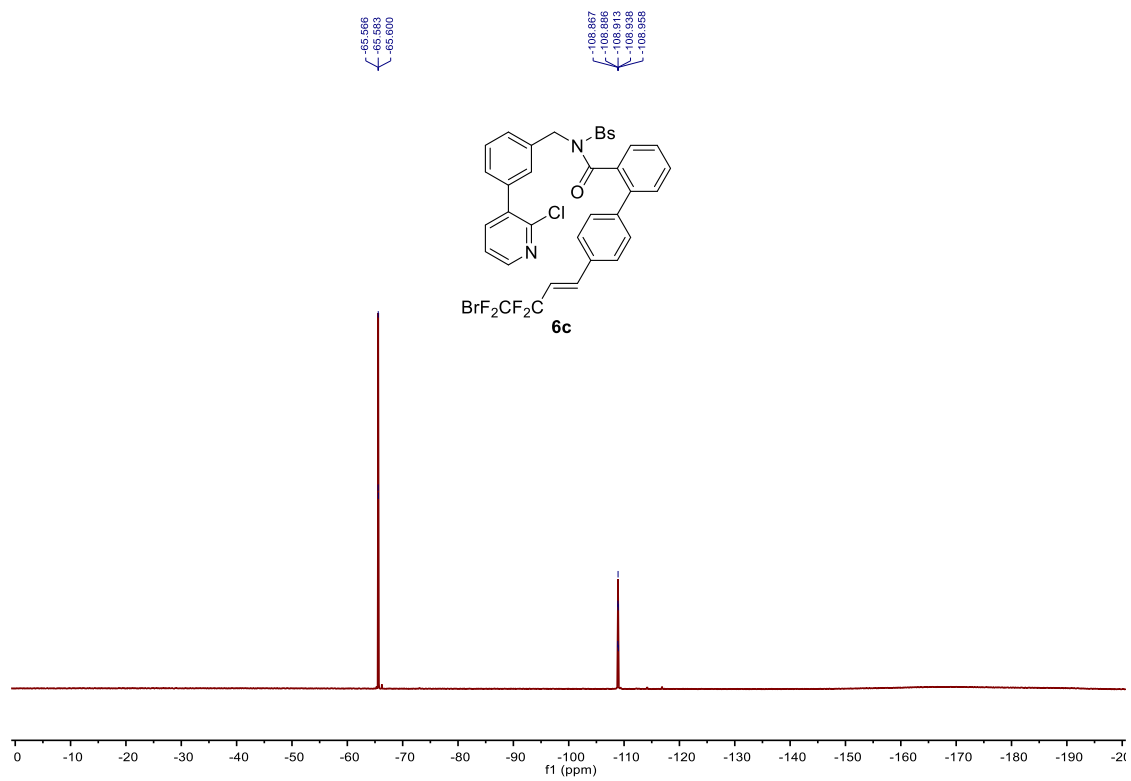

# <sup>1</sup>H NMR (400 MHz, Chloroform-*d*)

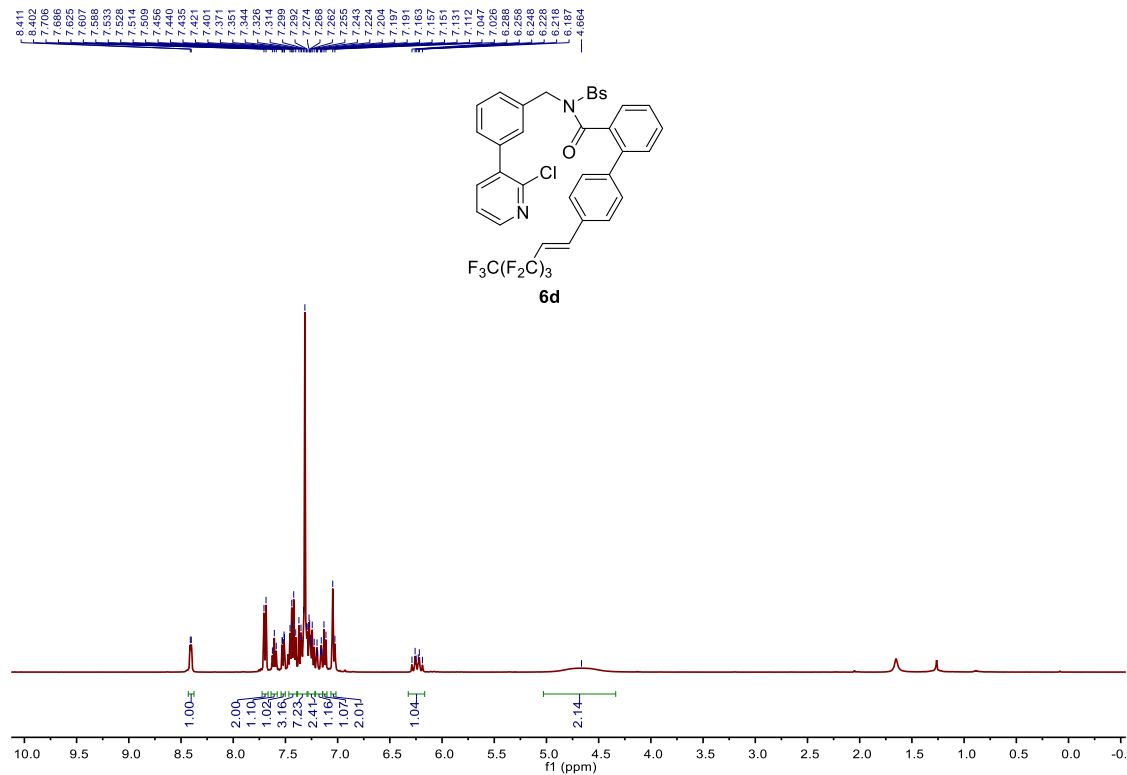

# <sup>13</sup>C NMR (101 MHz, Chloroform-*d*)

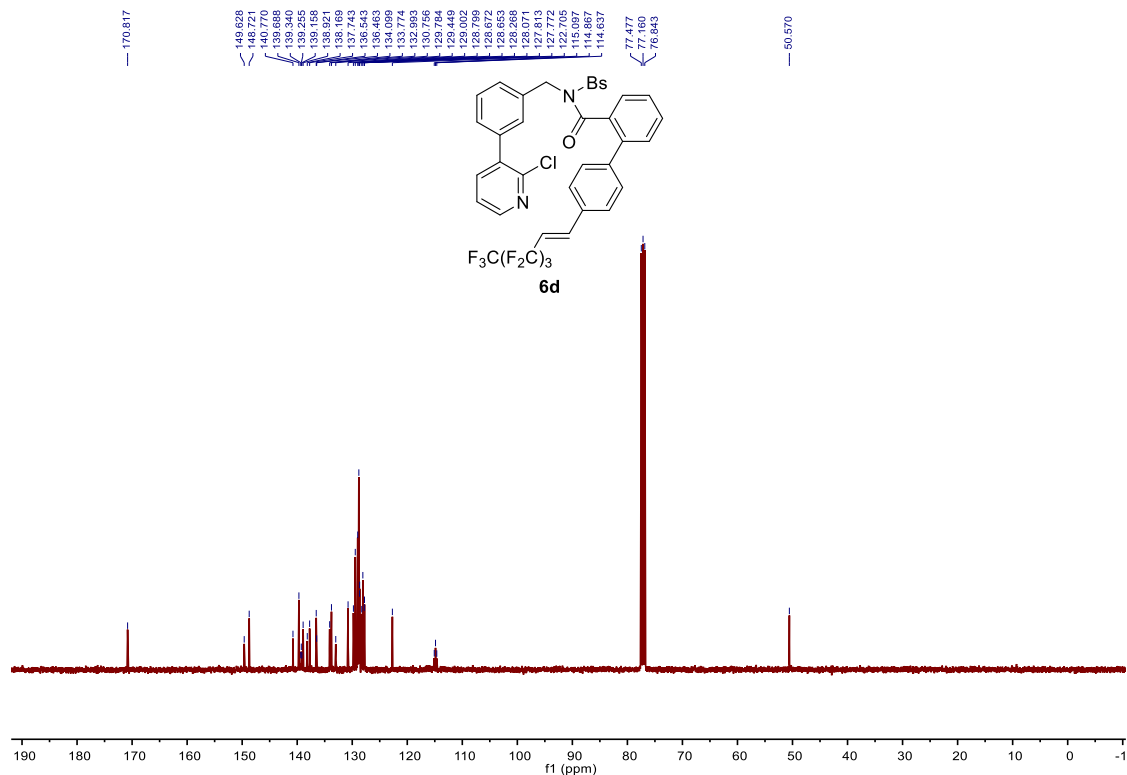





<sup>1</sup>H NMR (400 MHz, Chloroform-*d*)

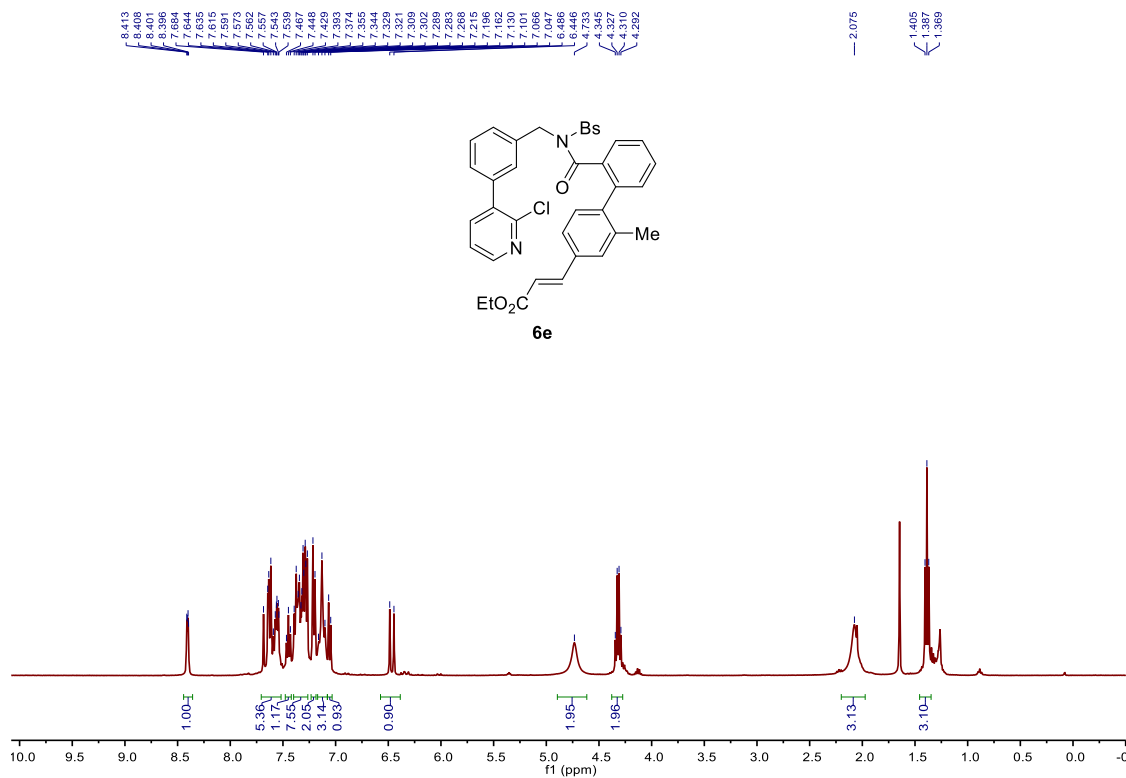

<sup>13</sup>C NMR (101 MHz, Chloroform-*d*)

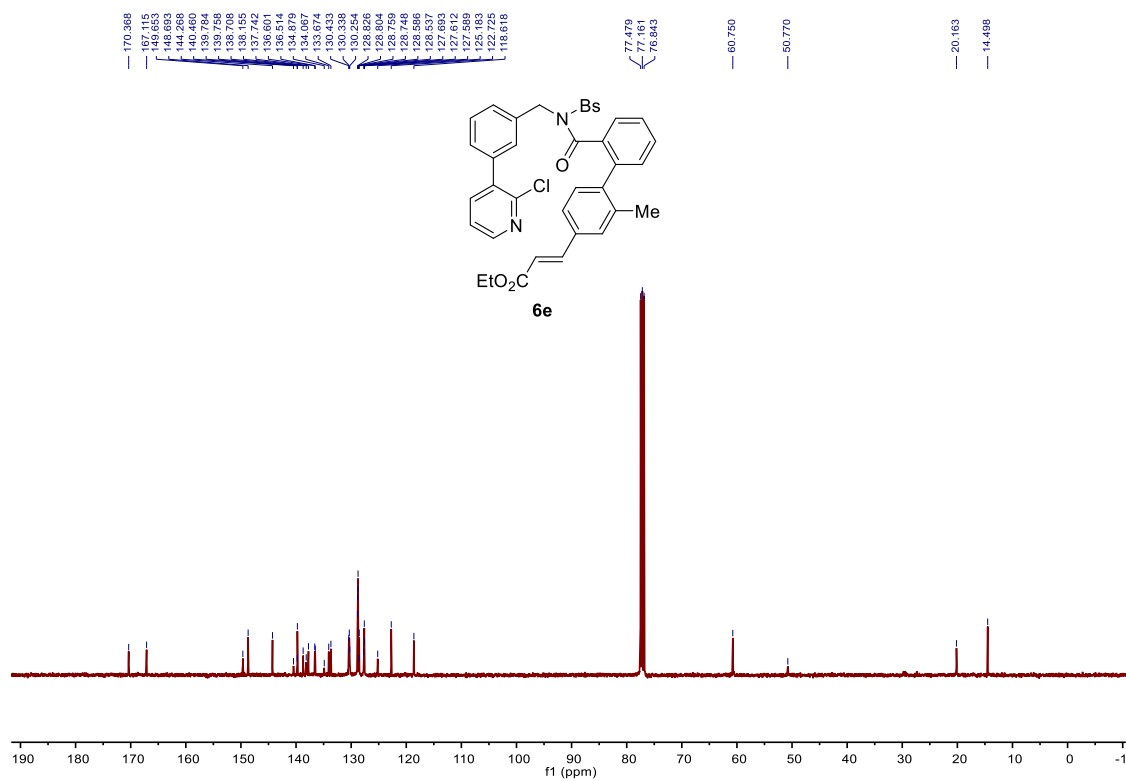

<sup>1</sup>H NMR (400 MHz, Chloroform-*d*)

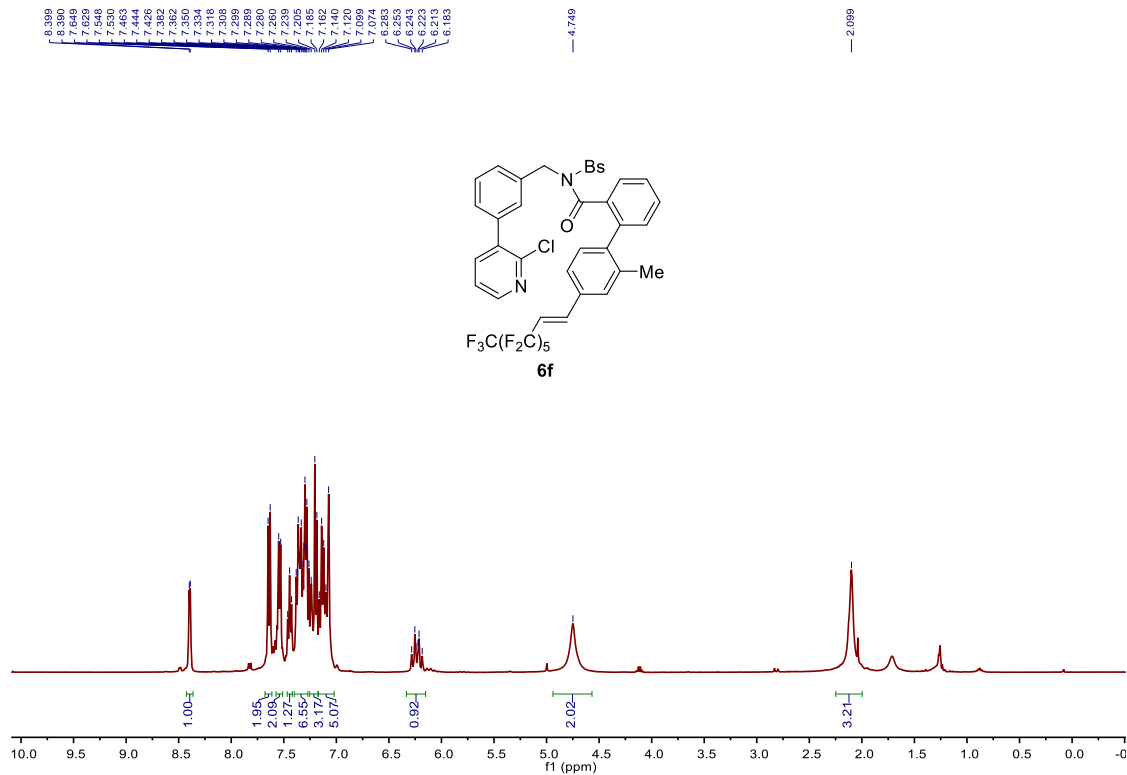

<sup>13</sup>C NMR (101 MHz, Chloroform-*d*)

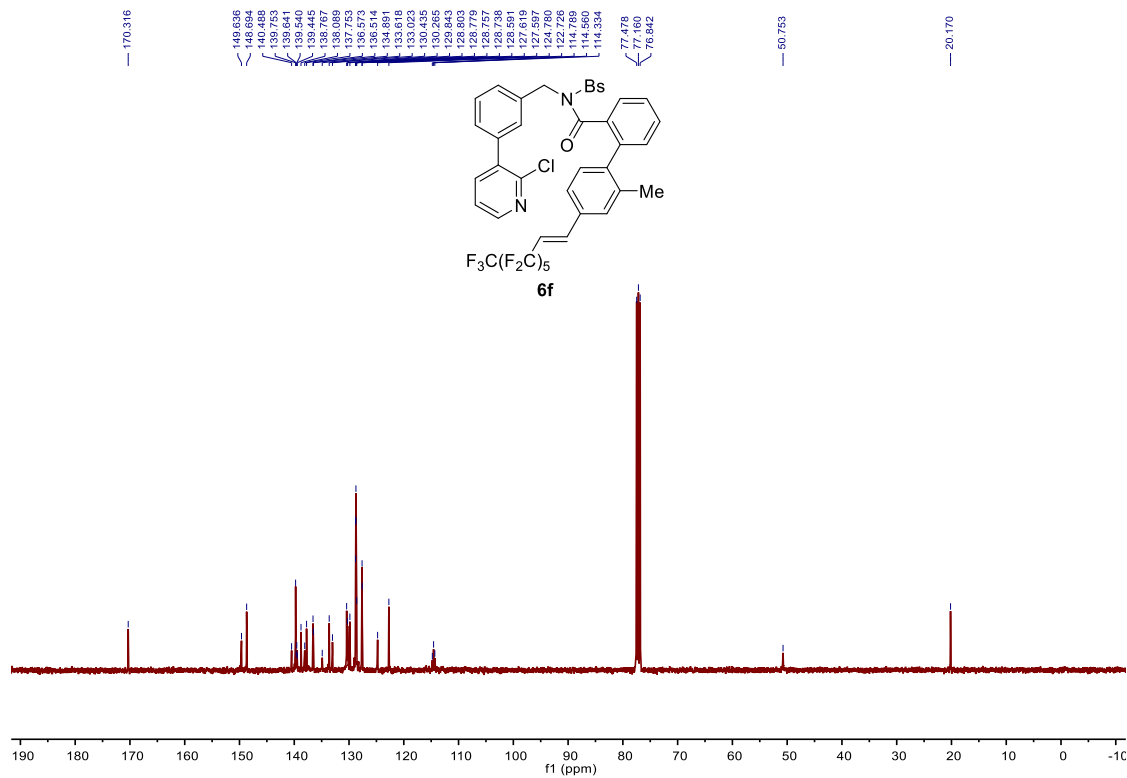

$^{19}\text{F}$  NMR (376 MHz, Chloroform-*d*)

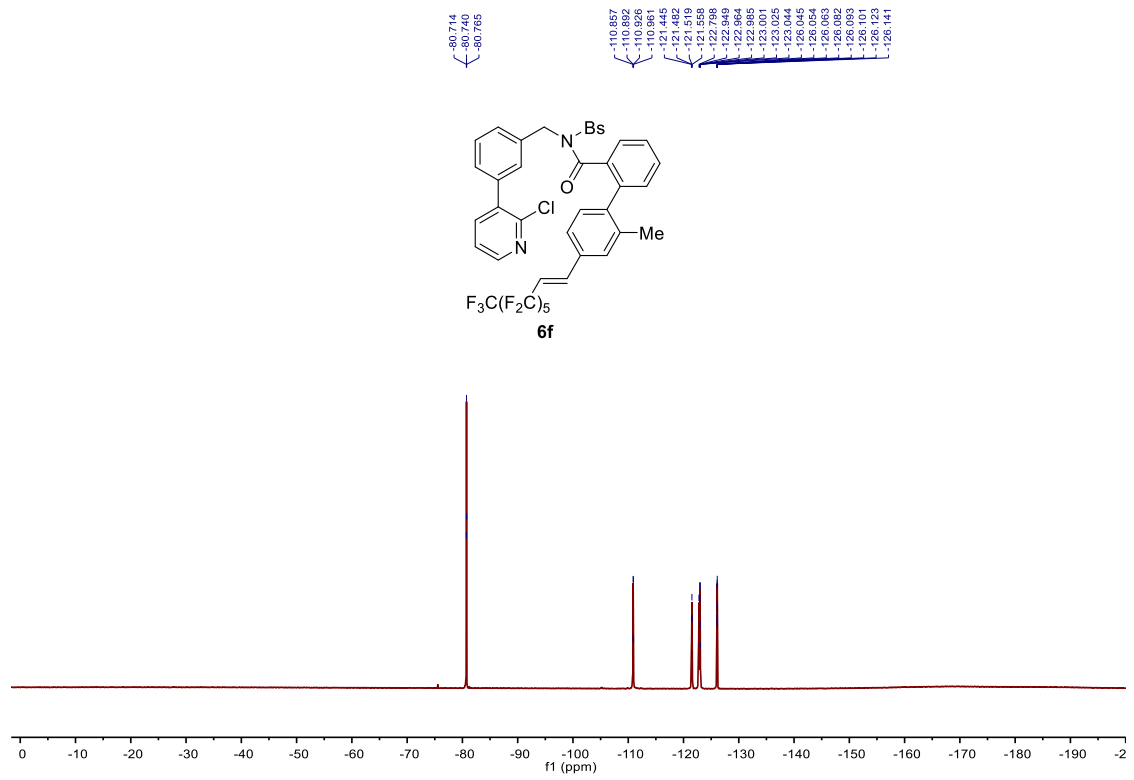

<sup>1</sup>H NMR (400 MHz, Chloroform-*d*)

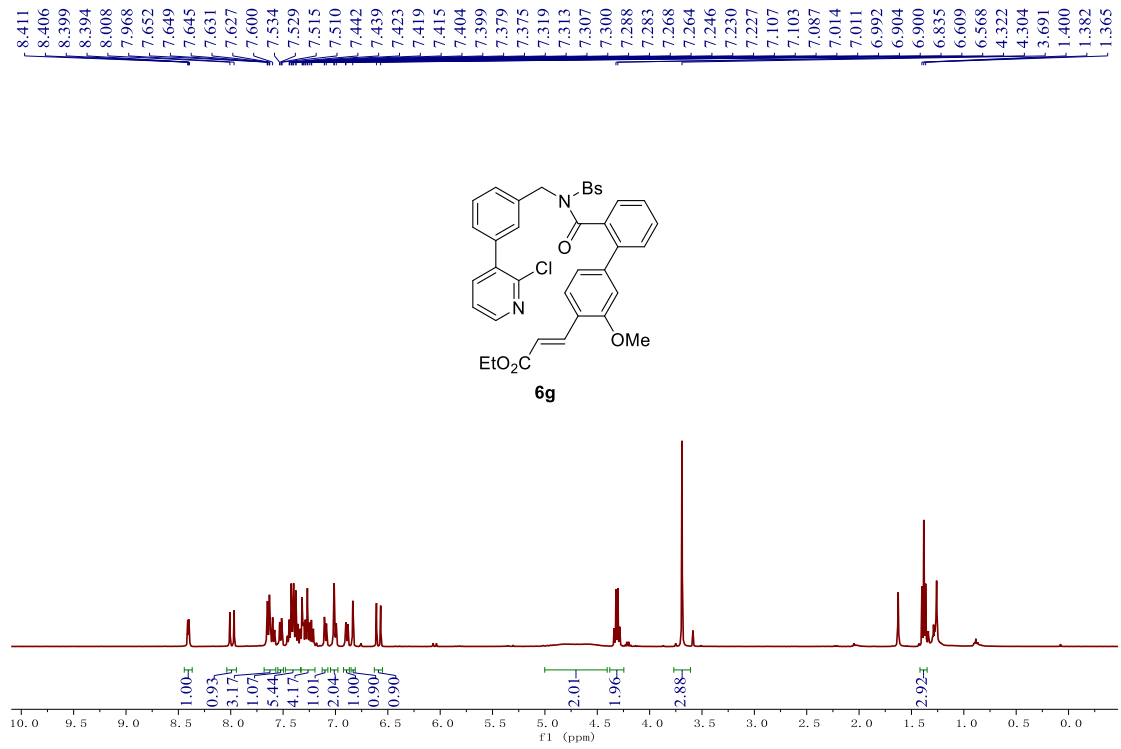

<sup>13</sup>C NMR (101 MHz, Chloroform-*d*)

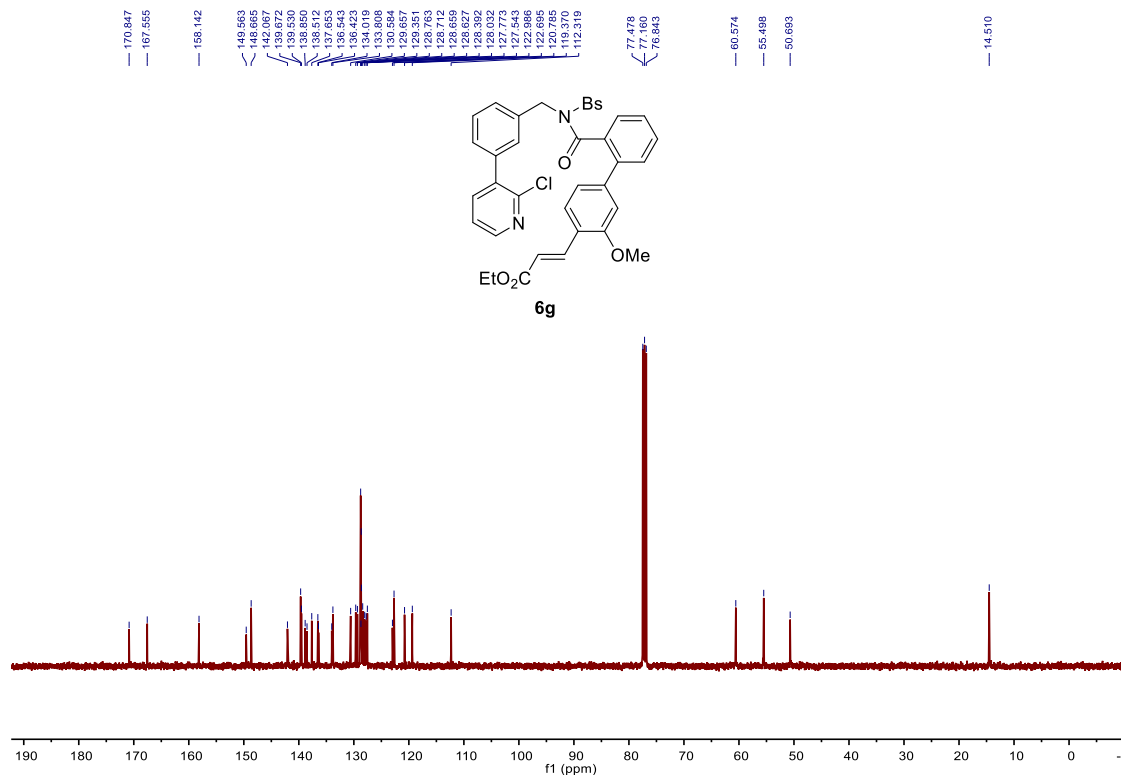



$^{19}\text{F}$  NMR (376 MHz, Chloroform-*d*)

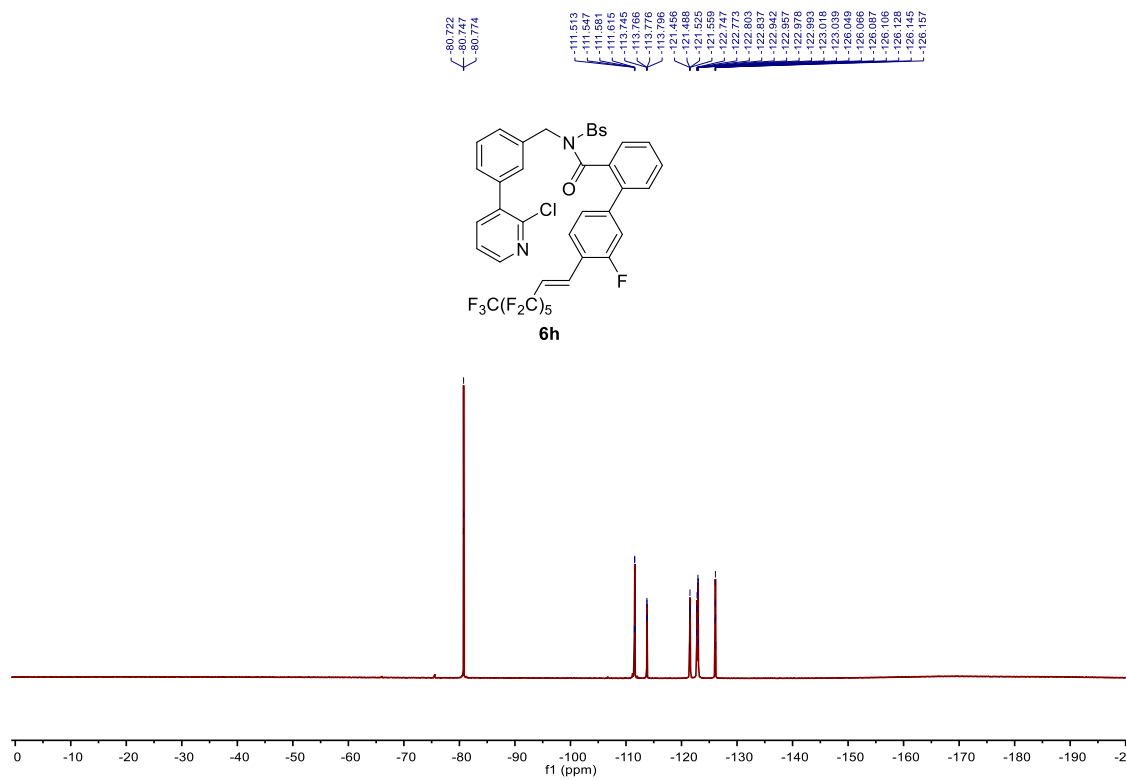







<sup>1</sup>H NMR (400 MHz, Chloroform-*d*)

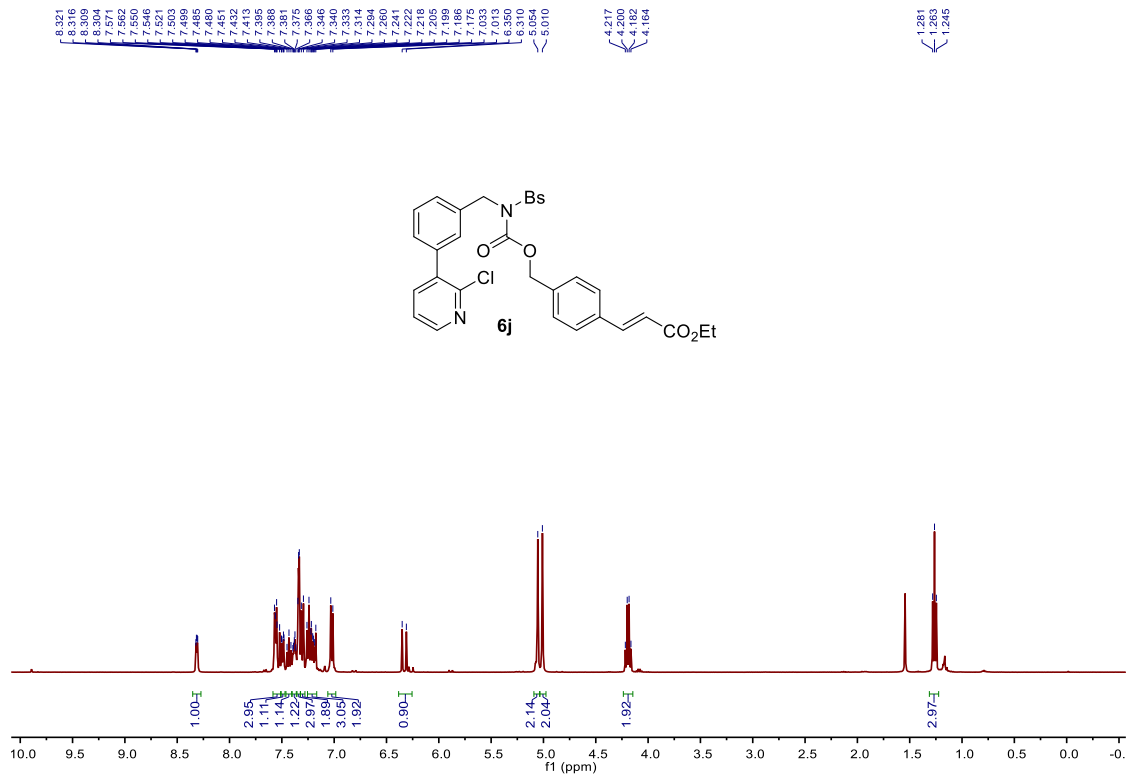

<sup>13</sup>C NMR (101 MHz, Chloroform-*d*)

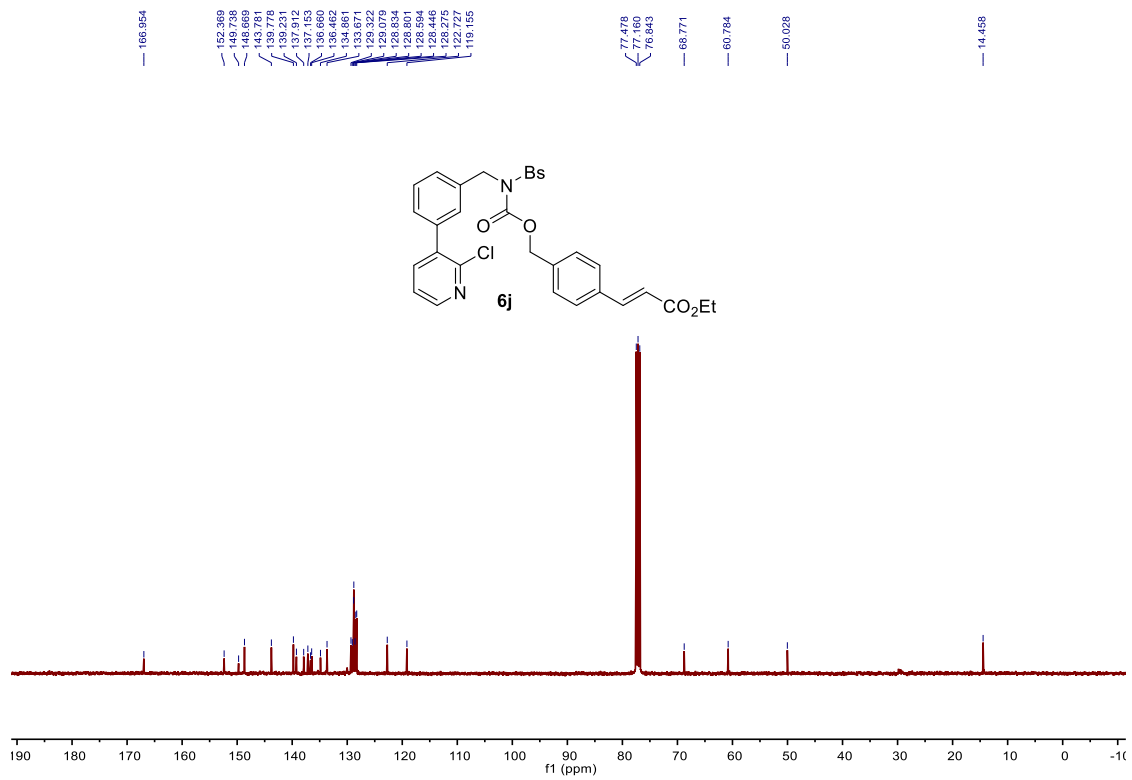

# <sup>1</sup>H NMR (400 MHz, Chloroform-*d*)

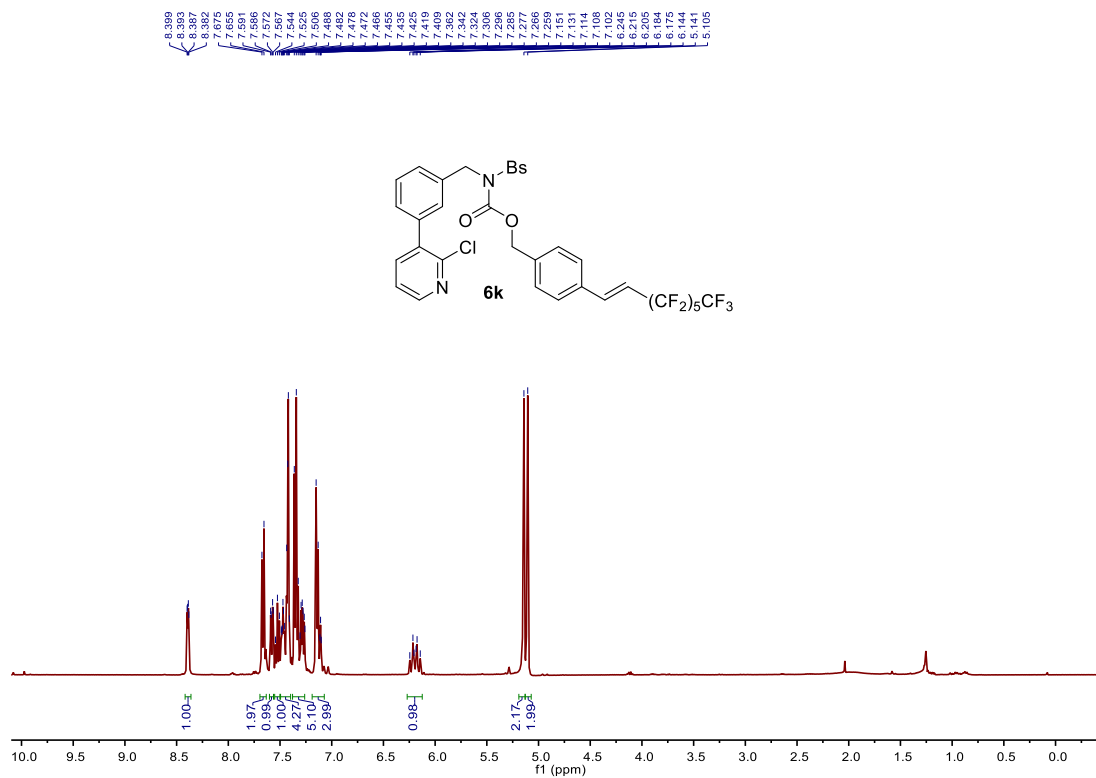

# <sup>13</sup>C NMR (101 MHz, Chloroform-*d*)

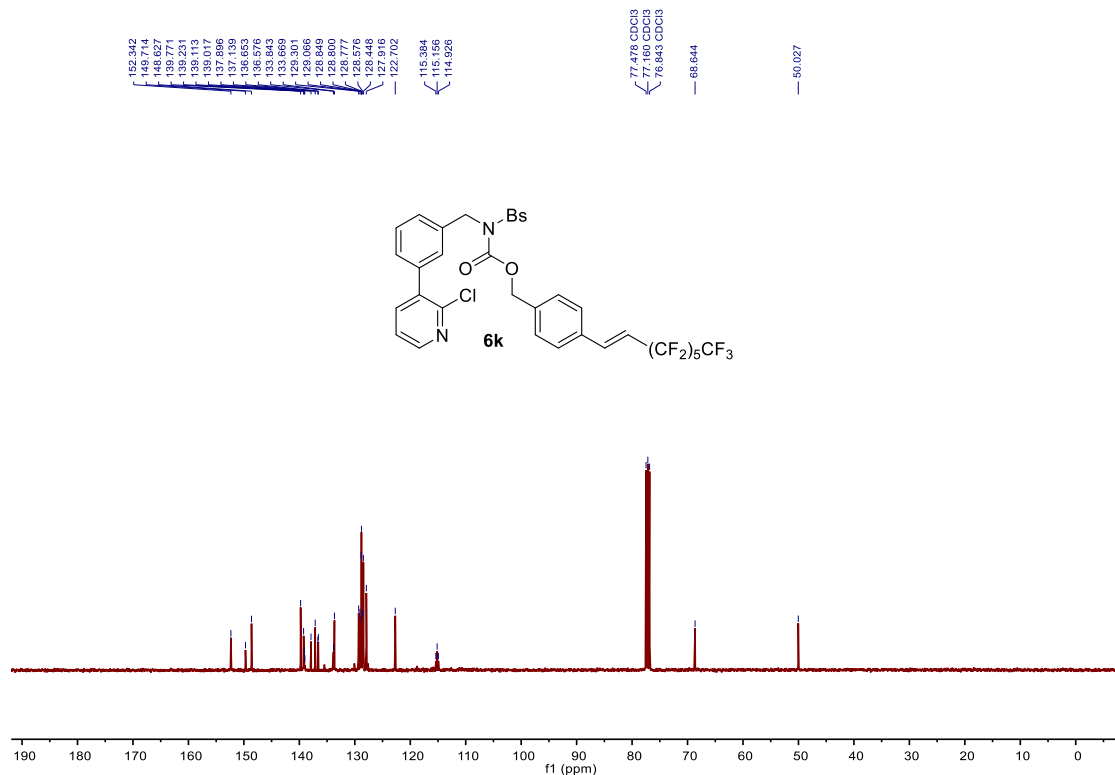

<sup>19</sup>F NMR (376 MHz, Chloroform-*d*)

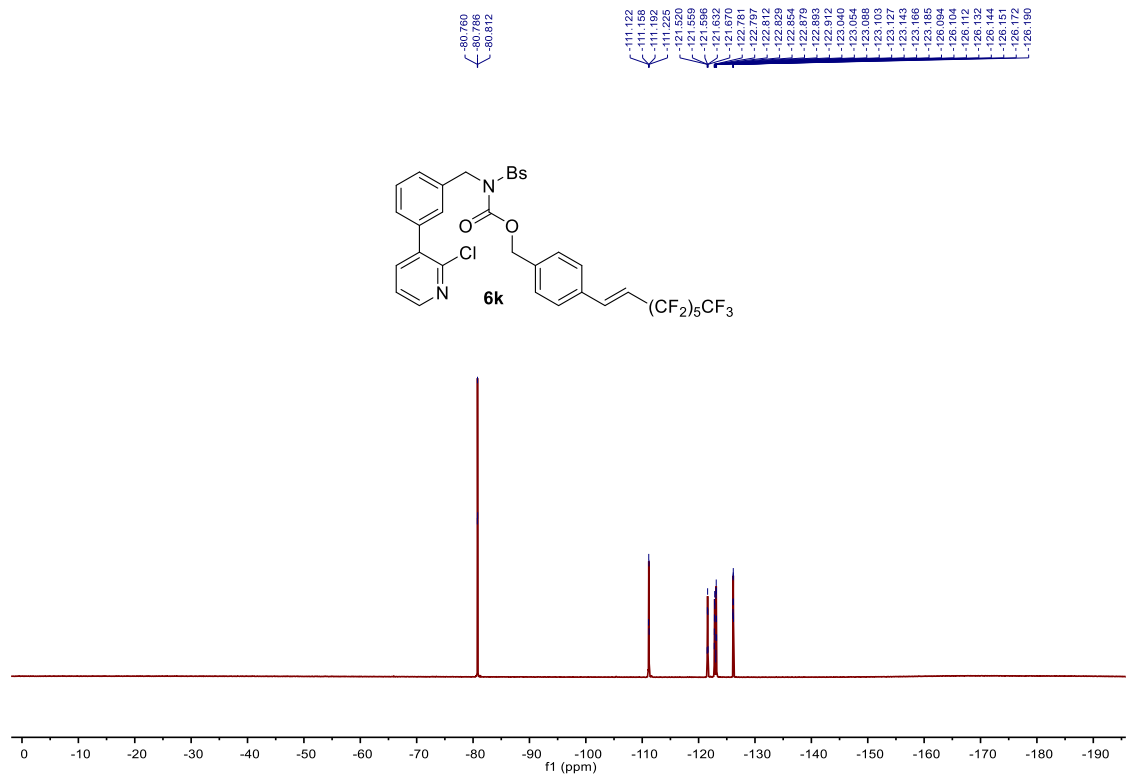

# <sup>1</sup>H NMR (400 MHz, Chloroform-*d*)

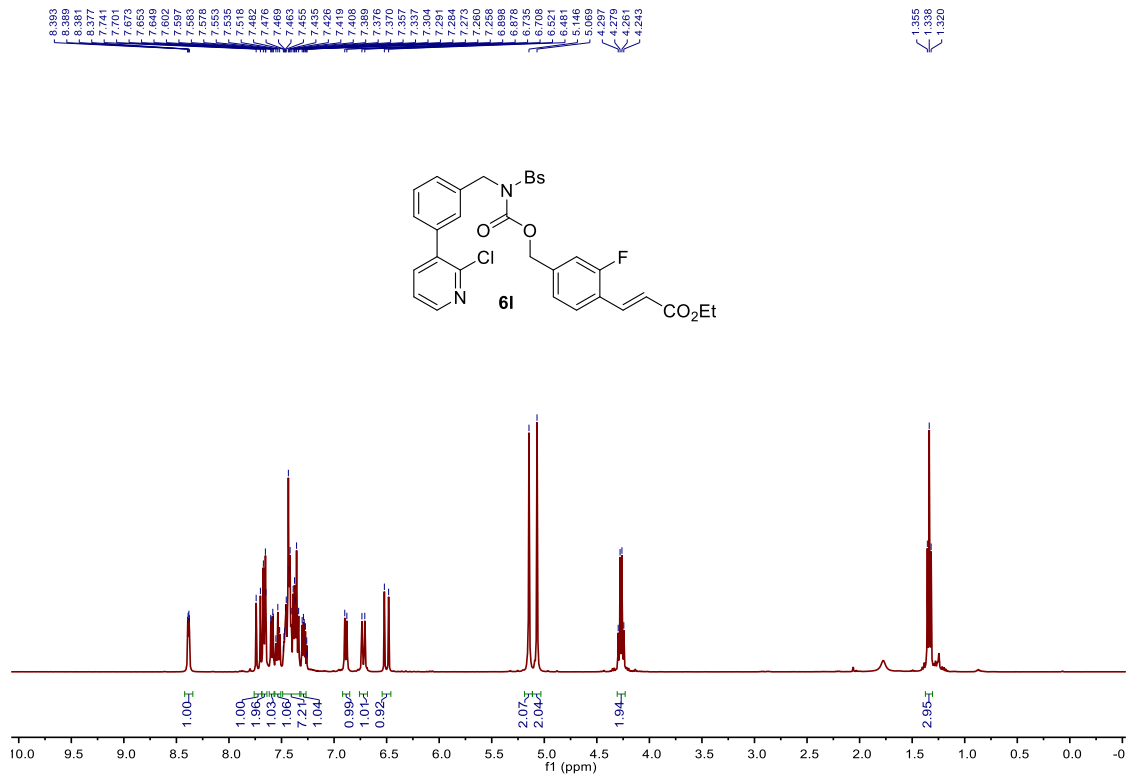

# <sup>13</sup>C NMR (101 MHz, Chloroform-*d*)

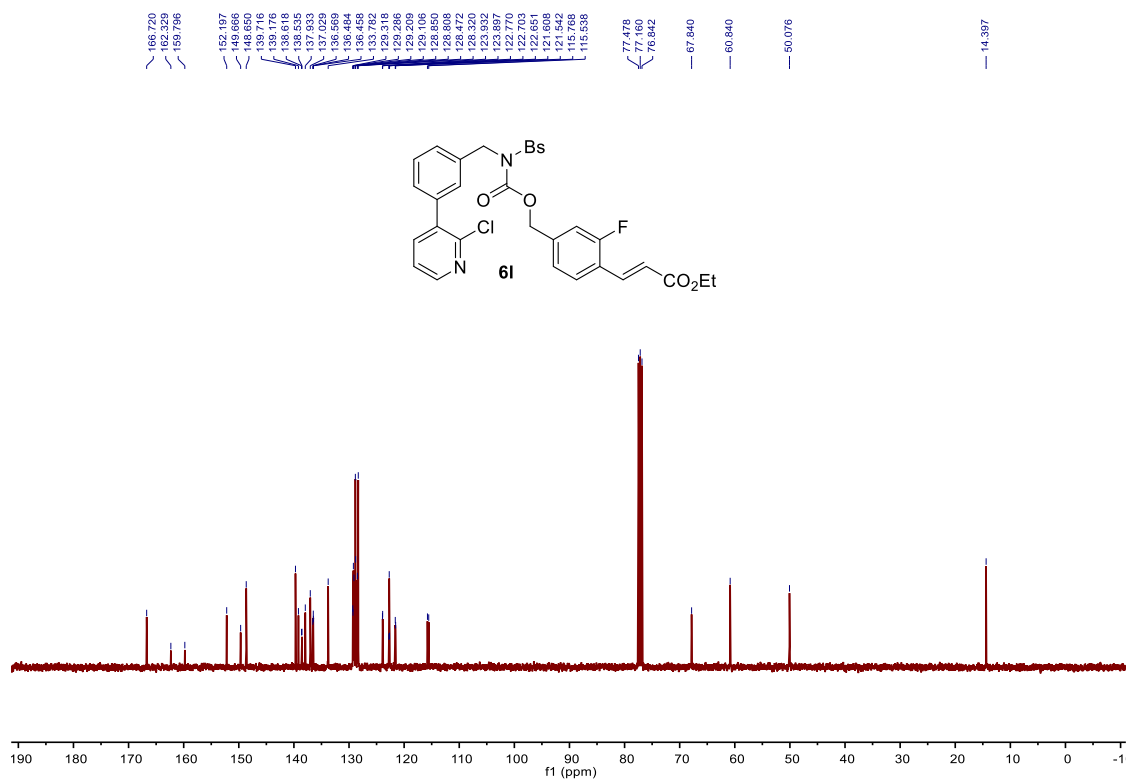

# <sup>1</sup>H NMR (400 MHz, Chloroform-*d*)

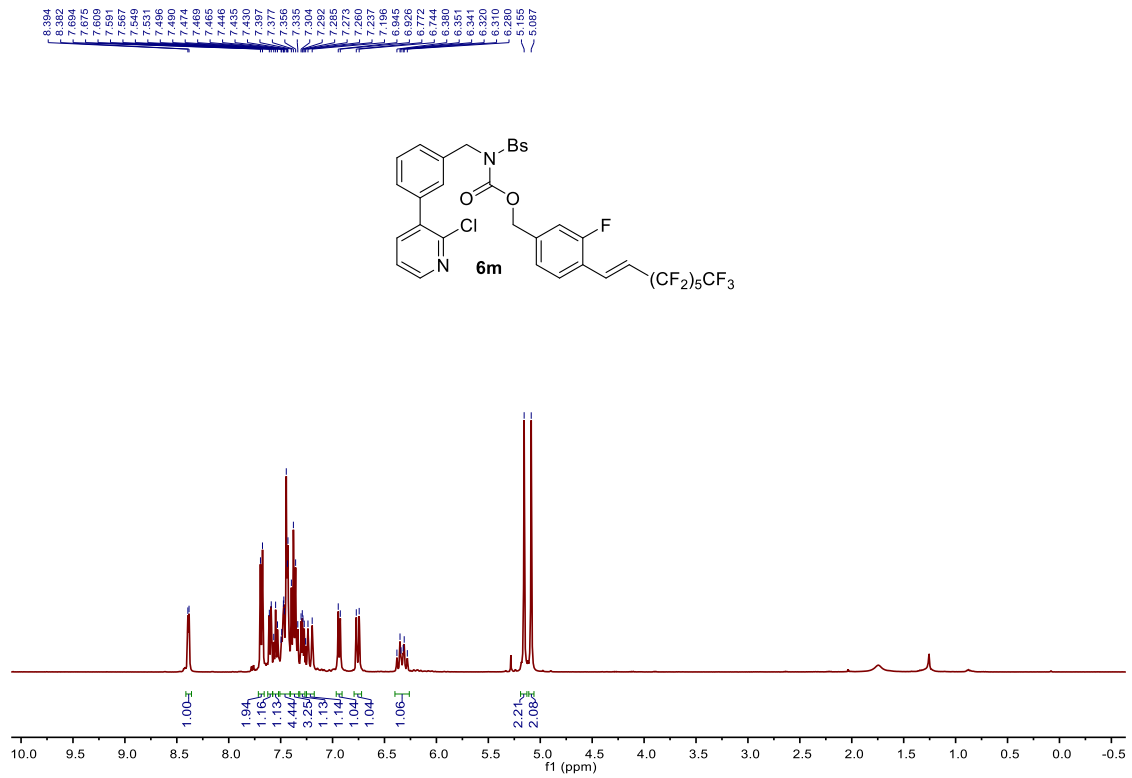

# <sup>13</sup>C NMR (101 MHz, Chloroform-*d*)

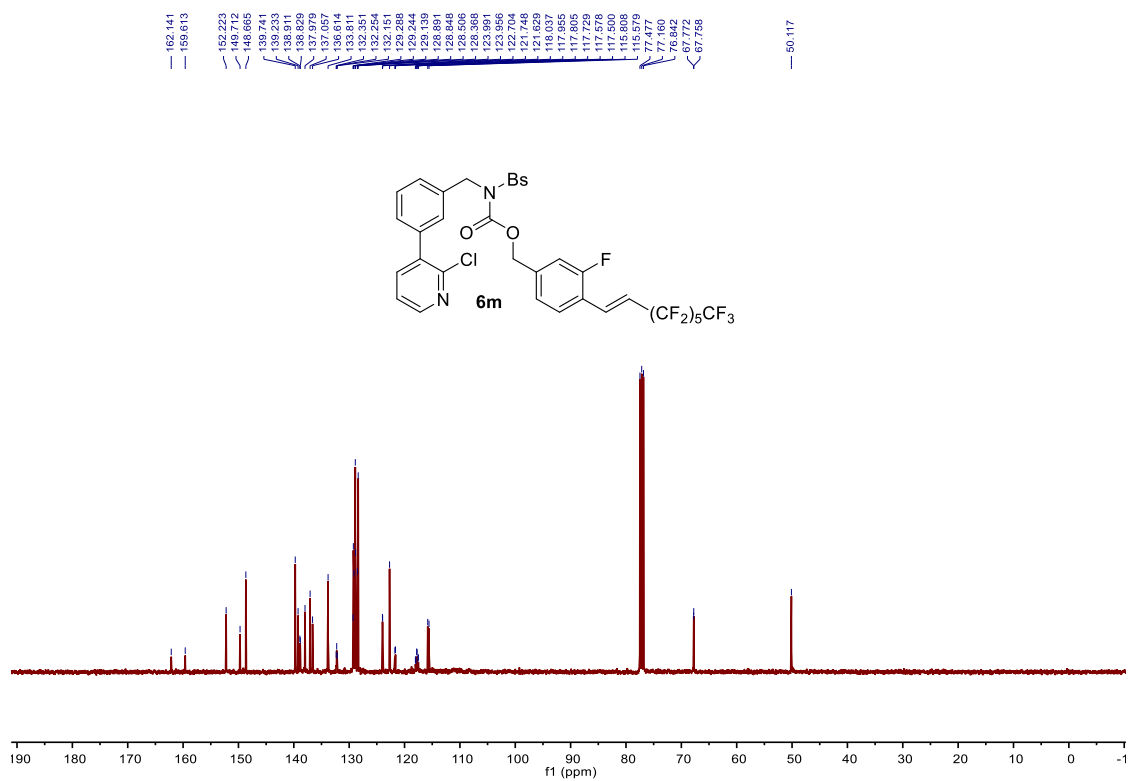

<sup>19</sup>F NMR (376 MHz, Chloroform-*d*)

Chemical shift values (ppm):  
-80.784, -80.821, -80.847  
-111.688, -111.722, -111.756, -111.790, -114.310, -114.330, -114.339, -114.353, -114.365, -121.639, -121.797, -121.824, -121.829, -122.844, -122.870, -122.893, -122.910, -122.919, -122.942, -123.096, -123.110, -123.135, -123.149, -123.173, -123.192, -126.130, -126.150, -126.169, -126.188, -126.224

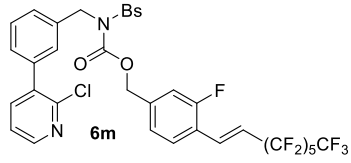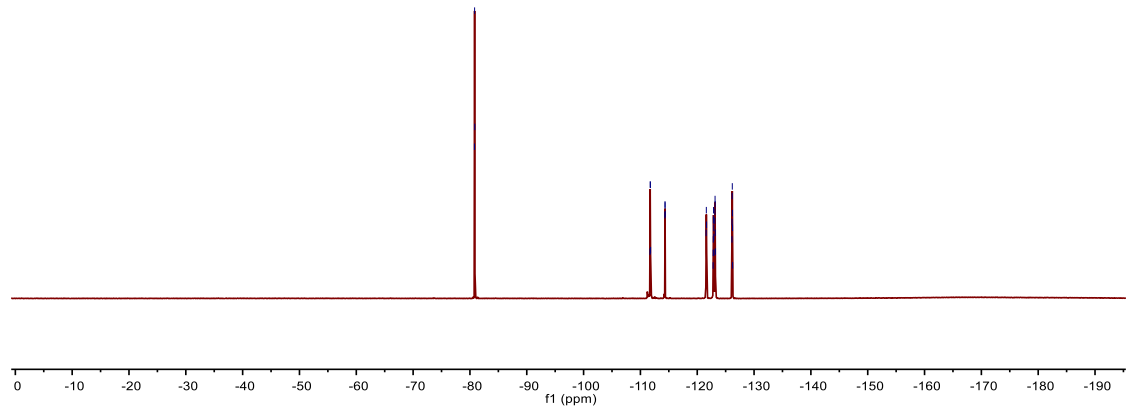

# <sup>1</sup>H NMR (400 MHz, Chloroform-*d*)

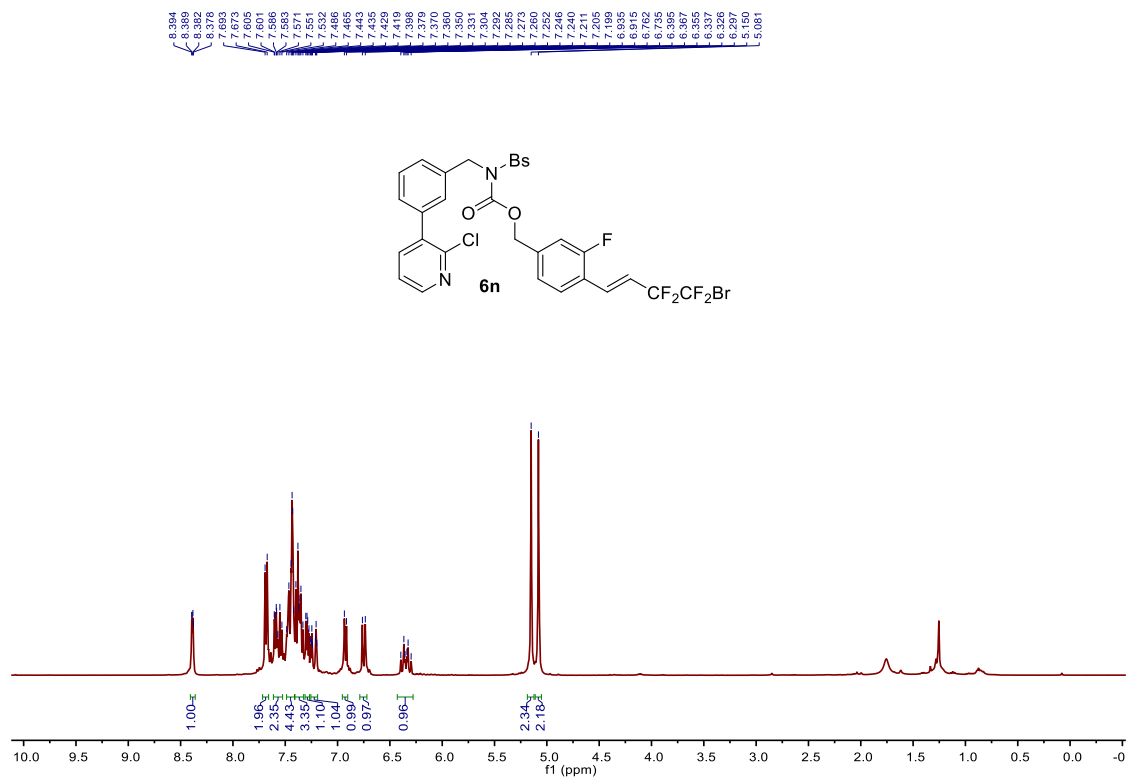

# <sup>13</sup>C NMR (101 MHz, Chloroform-*d*)

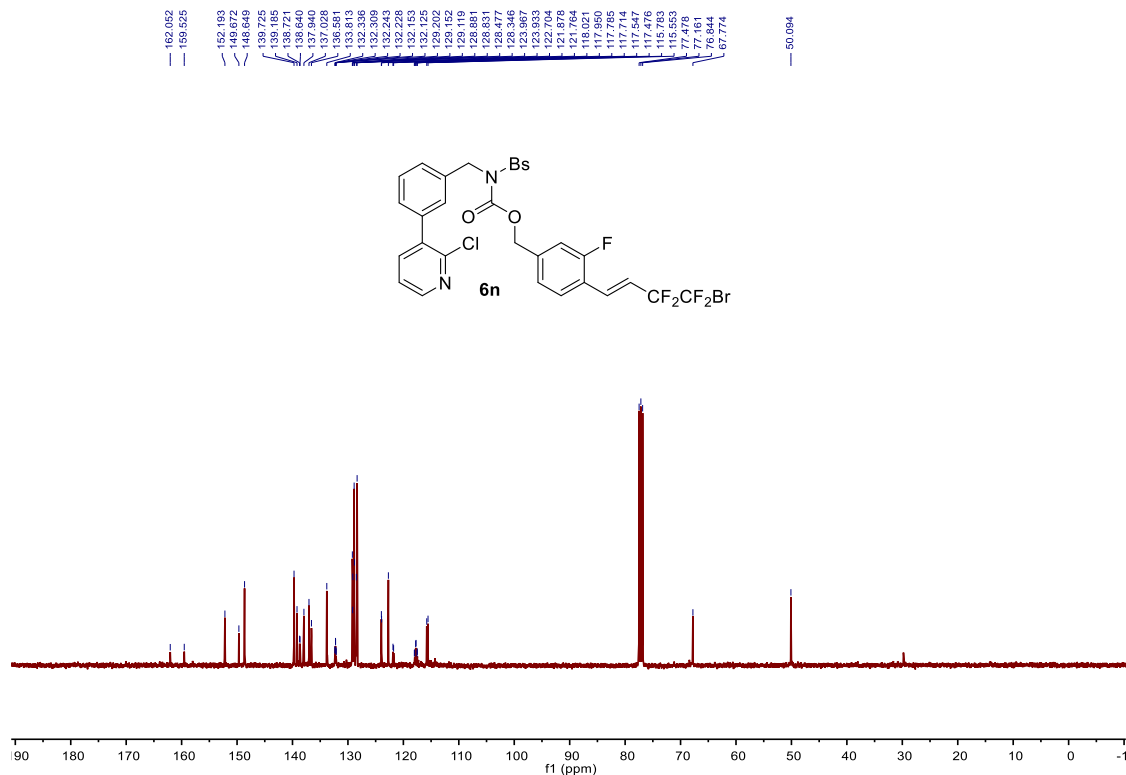

$^{19}\text{F}$  NMR (376 MHz, Chloroform-*d*)

← -66.710  
← -66.727  
← -67.744

← -109.865  
← -109.815  
← -109.530  
← -109.545  
← -109.562  
← -114.264  
← -114.374  
← -114.393

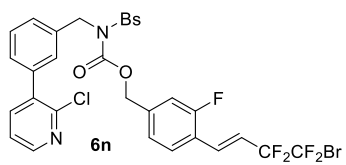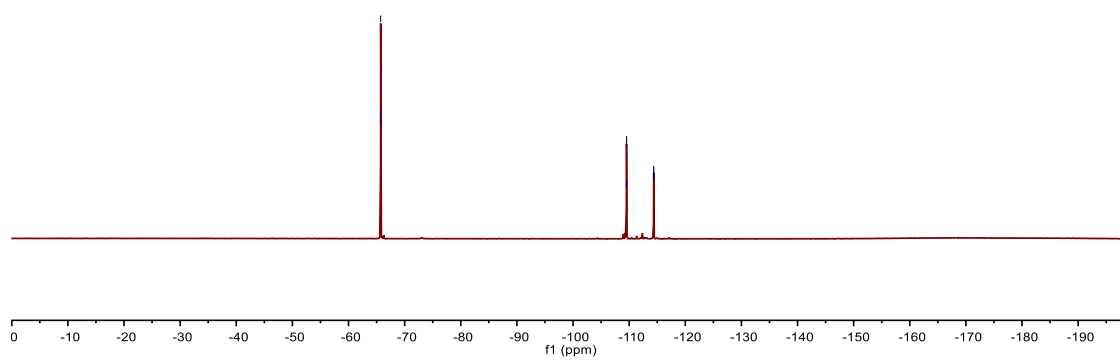



<sup>1</sup>H NMR (400 MHz, Chloroform-*d*)

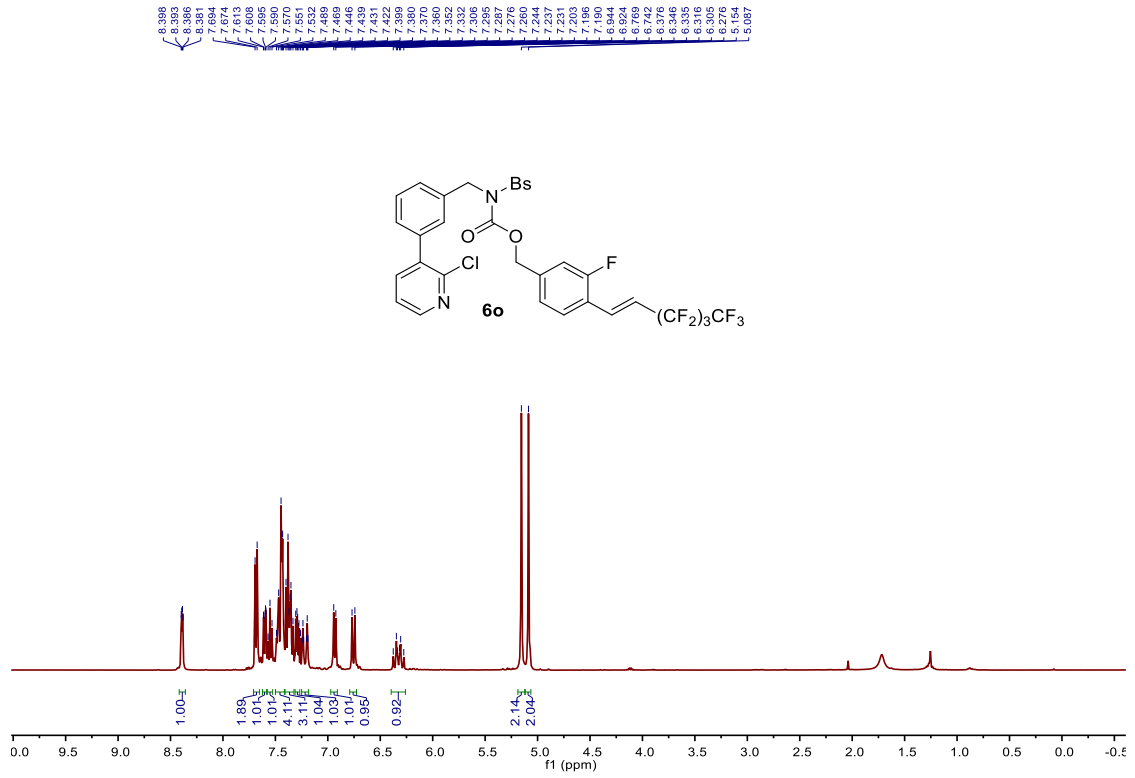

<sup>13</sup>C NMR (101 MHz, Chloroform-*d*)

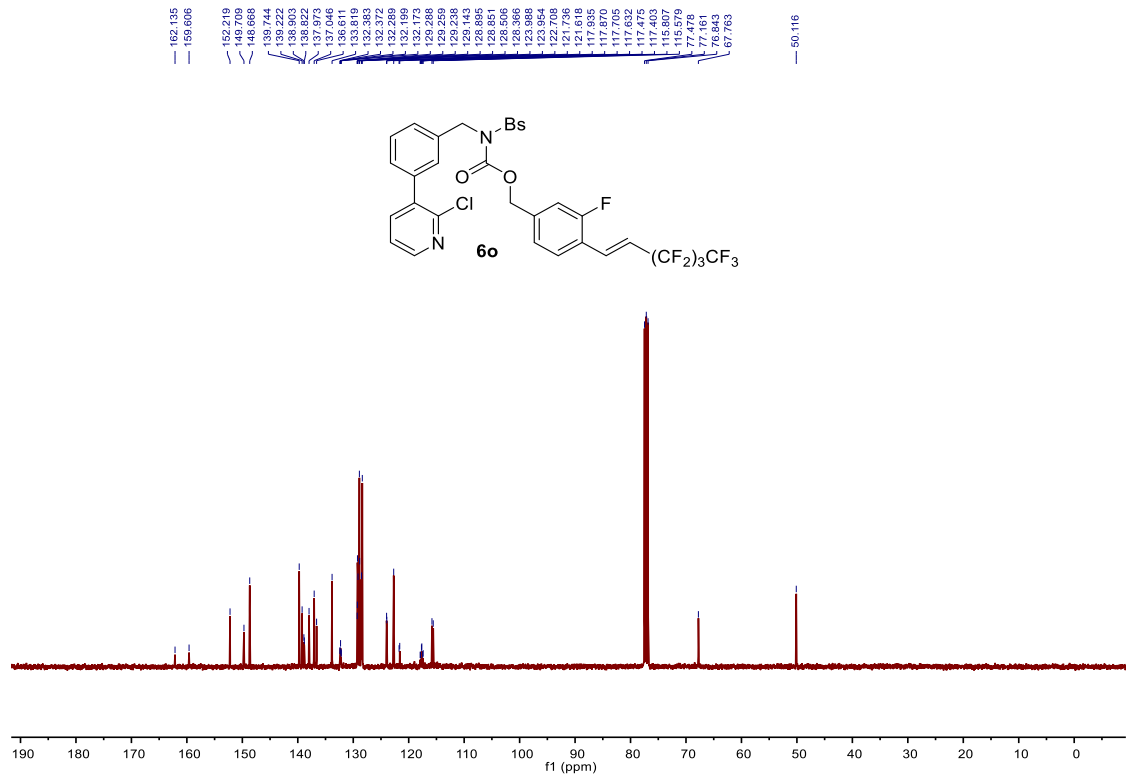

<sup>19</sup>F NMR (376 MHz, Chloroform-*d*)

-80.961  
-80.970  
-80.977  
-80.984  
-81.013  
-81.020  
-81.029

-111.900  
-111.932  
-111.964  
-111.986  
-114.284  
-114.303  
-114.313  
-114.323  
-123.889  
-124.015  
-124.039  
-124.053  
-124.063  
-125.658  
-125.670  
-125.686  
-125.696  
-125.719  
-125.733  
-125.747

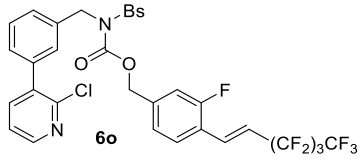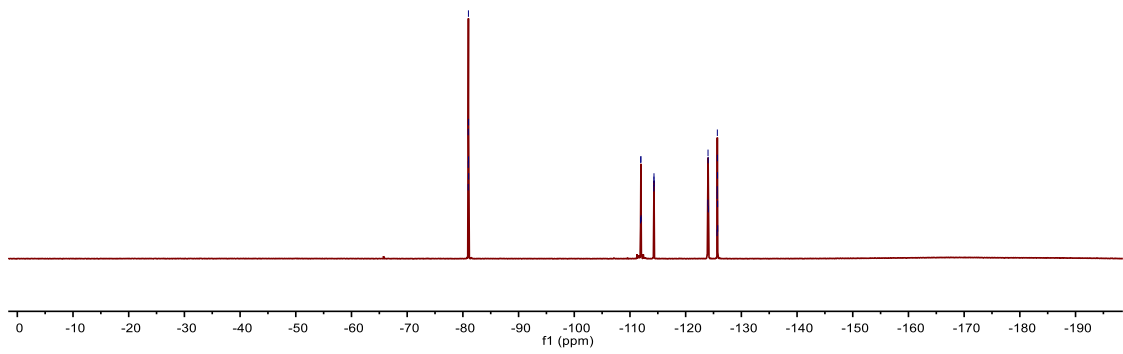

<sup>1</sup>H NMR (400 MHz, Chloroform-*d*)

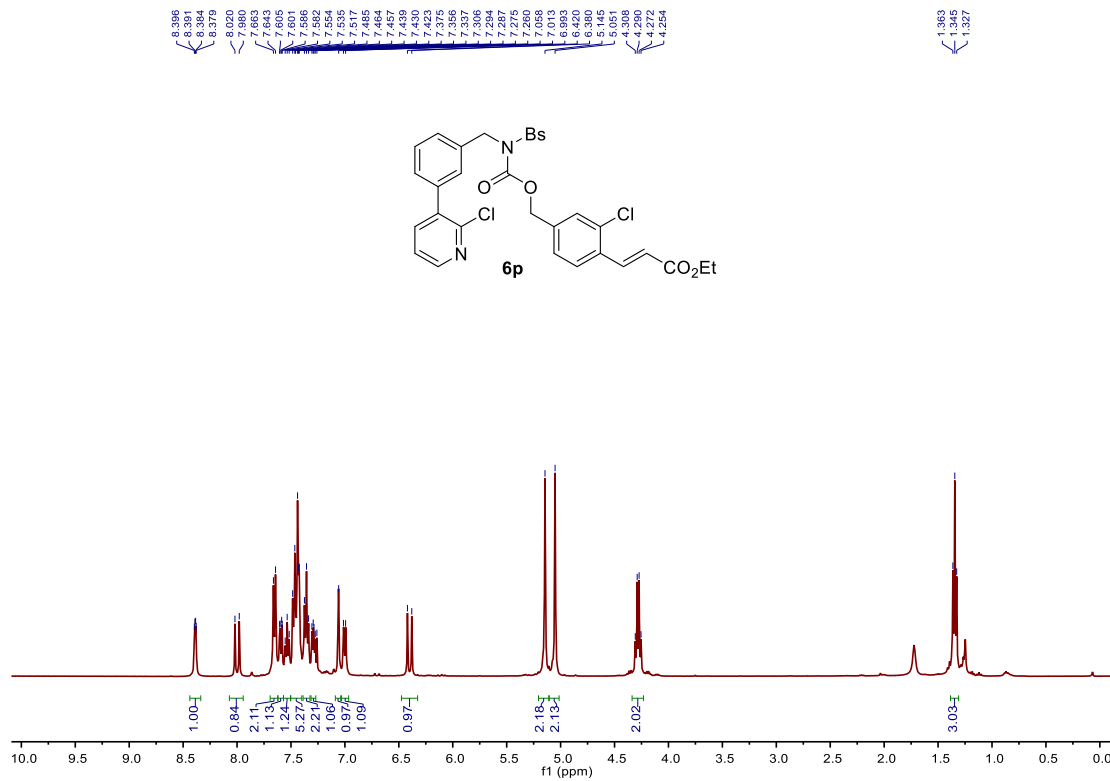

<sup>13</sup>C NMR (101 MHz, Chloroform-*d*)

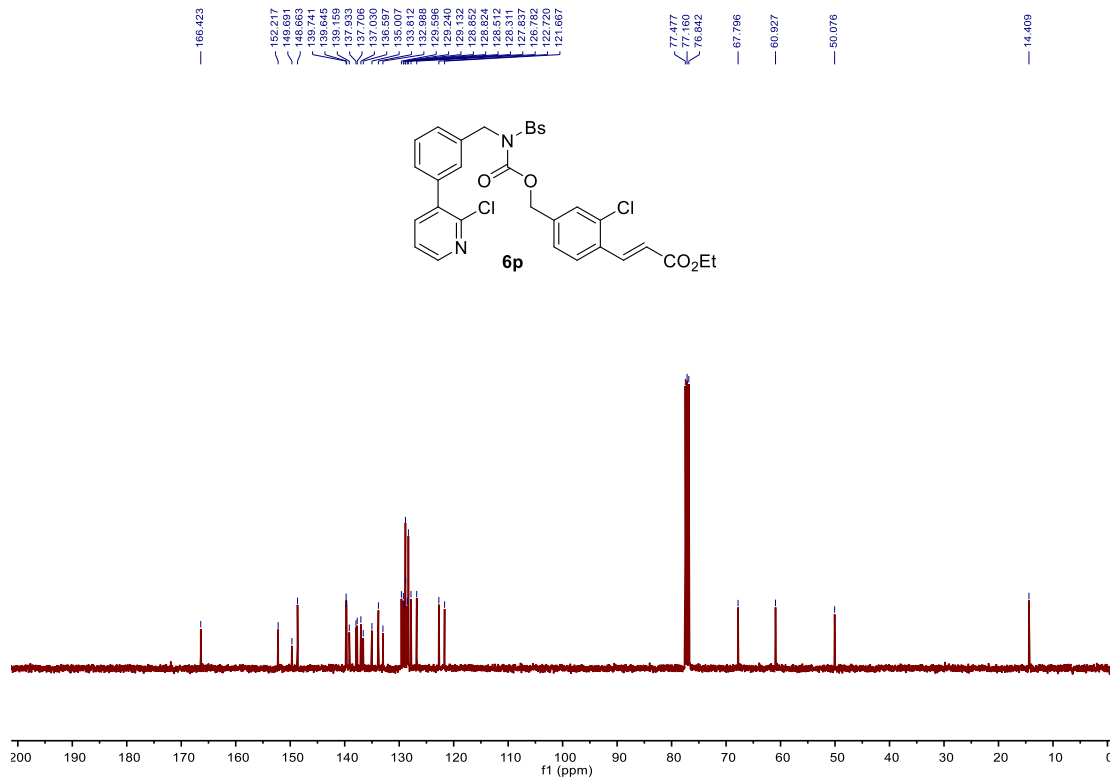

<sup>1</sup>H NMR (400 MHz, Chloroform-*d*)

7.670  
7.630  
7.454  
7.434  
7.370  
7.350  
7.307

6.413  
6.373

4.279  
4.243  
4.225  
4.145  
4.127  
4.093

2.978  
2.939  
2.937  
2.617  
2.596

1.346  
1.328  
1.240  
1.222  
1.204

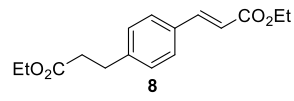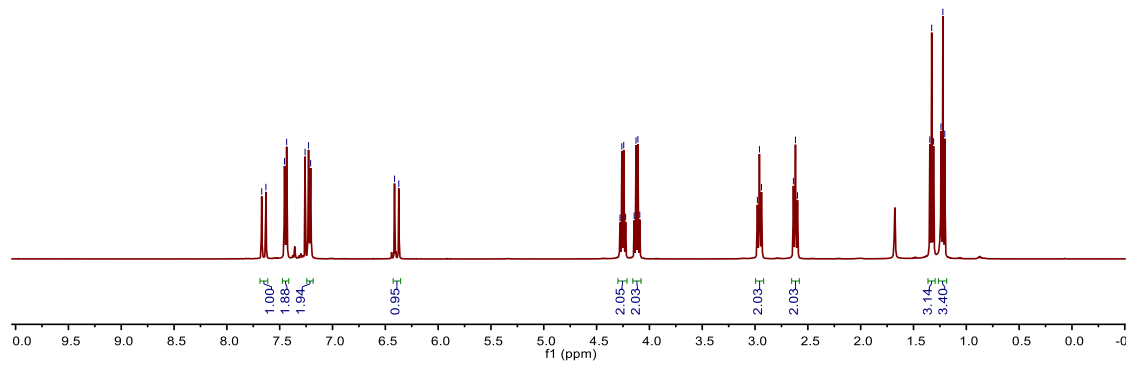

<sup>13</sup>C NMR (101 MHz, Chloroform-*d*)

172.776  
167.231

144.461  
143.247

132.709  
128.304

117.786

77.478  
77.160  
76.843

60.644  
60.586

35.665  
30.909

14.450  
14.318

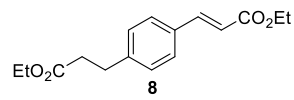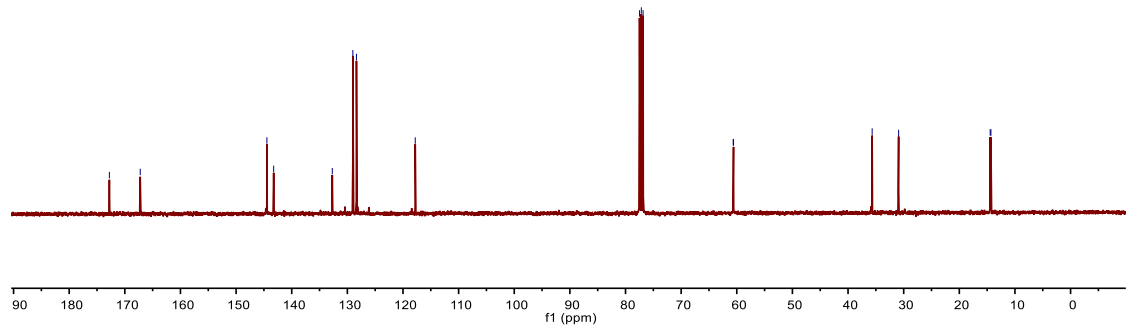

$^1\text{H}$  NMR (400 MHz, DMSO- $d_6$ )

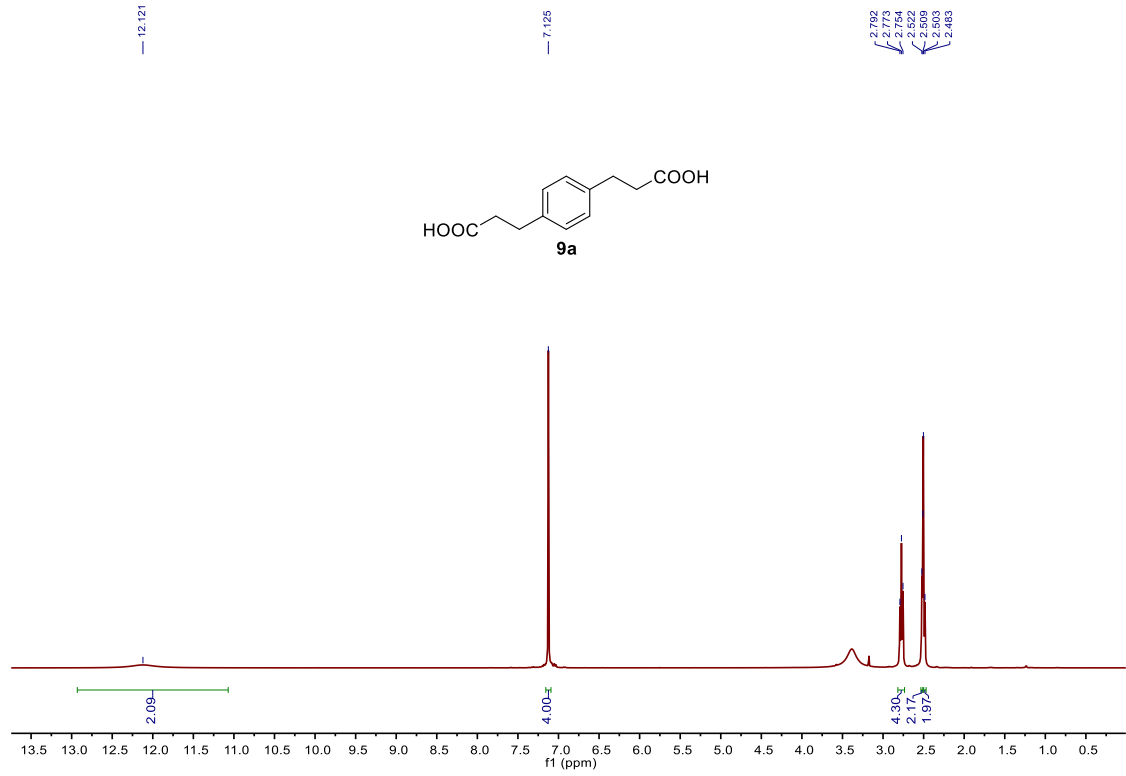

$^{13}\text{C}$  NMR (101 MHz, DMSO- $d_6$ )

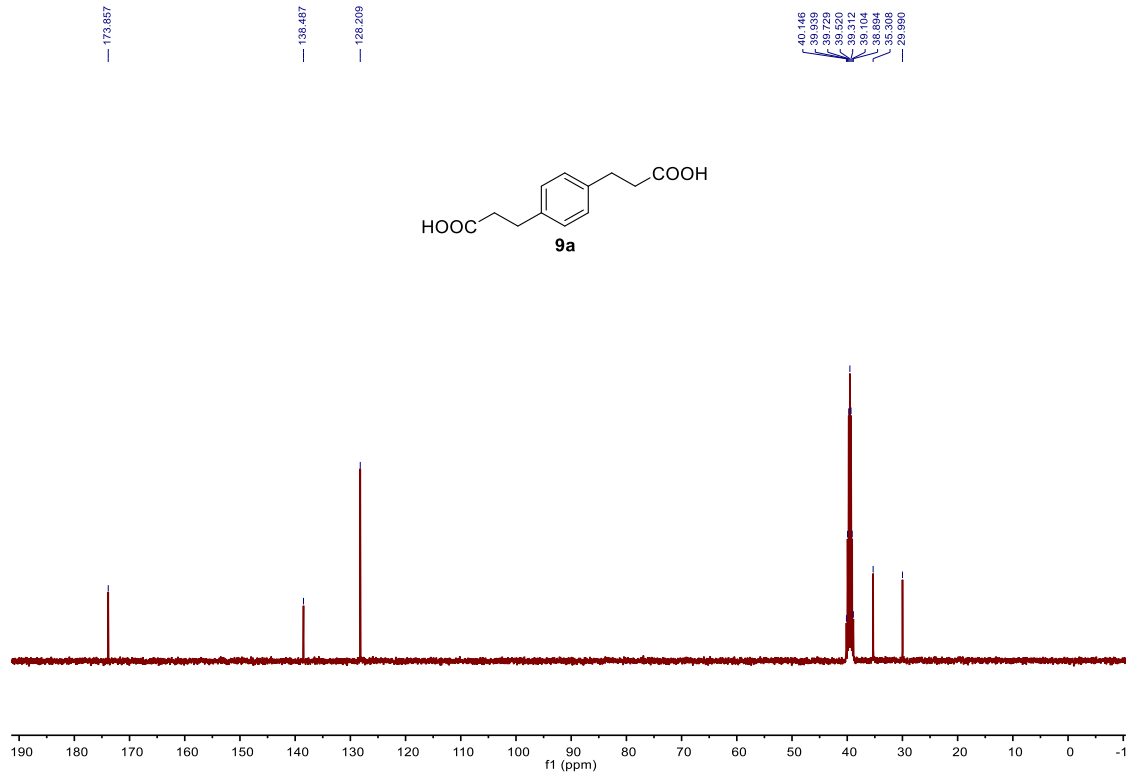

<sup>1</sup>H NMR (400 MHz, DMSO-d<sub>6</sub>)

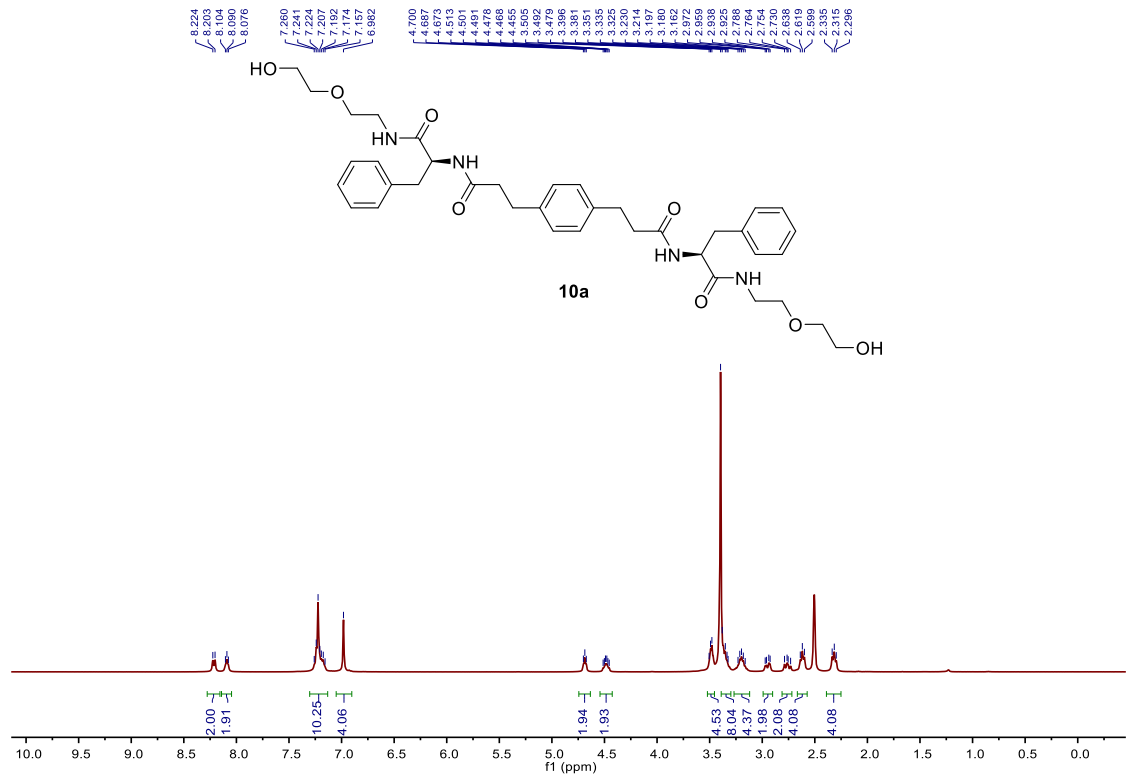

<sup>13</sup>C NMR (101 MHz, DMSO-d<sub>6</sub>)

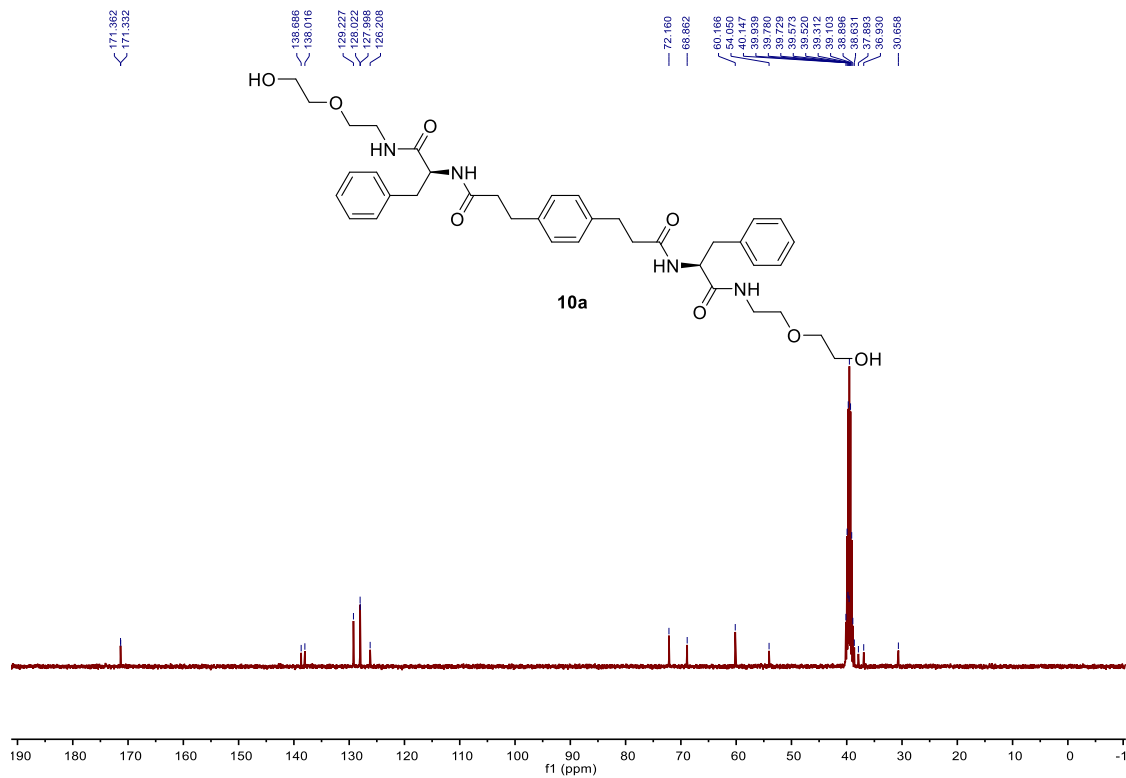

<sup>1</sup>H NMR (400 MHz, DMSO-d<sub>6</sub>)

7.755  
7.715  
7.638  
7.598  
7.186  
7.142  
7.122  
6.566  
6.526

2.871  
2.852  
2.833  
2.814  
2.554

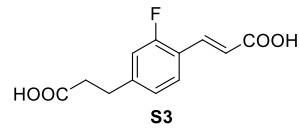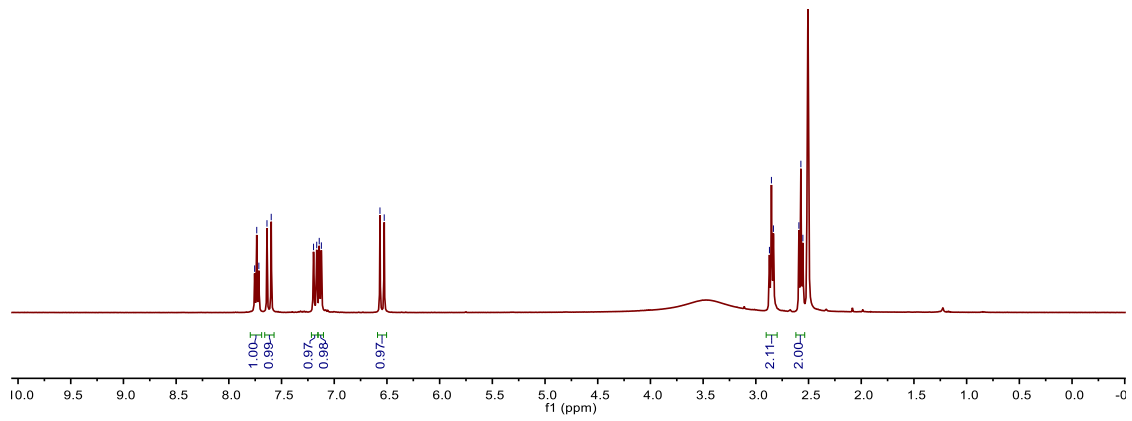

<sup>13</sup>C NMR (101 MHz, DMSO-d<sub>6</sub>)

173.571  
167.428  
163.711  
159.219

146.400  
146.316  
135.765  
135.733  
128.100  
127.985  
125.097  
125.058  
121.042  
120.986  
118.512  
115.905  
115.688

40.148  
39.938  
39.728  
39.518  
39.311  
39.102  
38.894  
34.476  
28.970

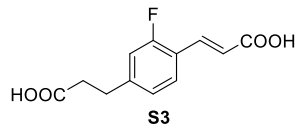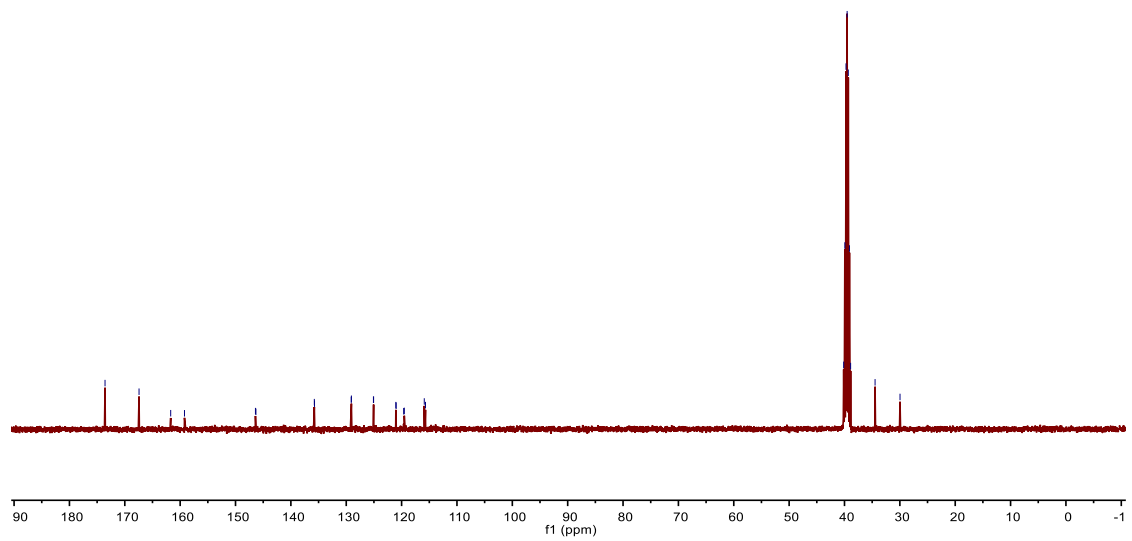

$^1\text{H}$  NMR (400 MHz, DMSO- $d_6$ )

7.708  
7.708  
7.019  
6.885  
6.862

2.800  
2.783  
2.765  
2.518  
2.502  
2.475

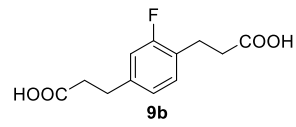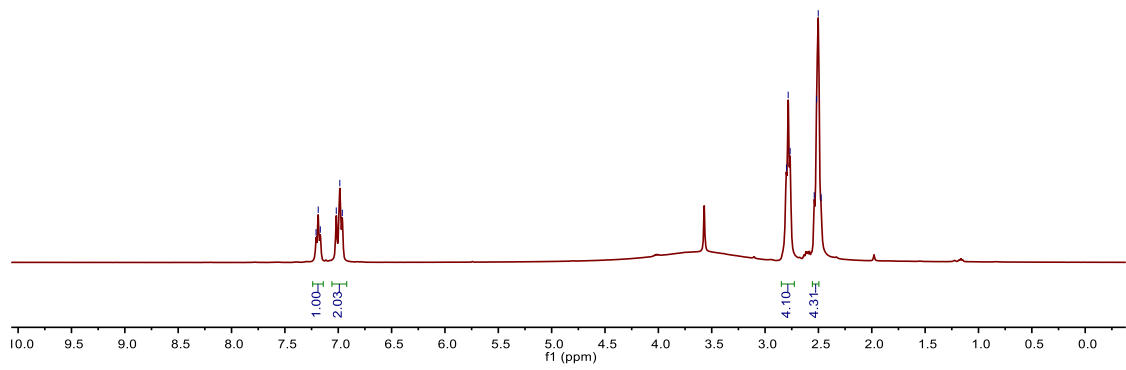

$^{13}\text{C}$  NMR (101 MHz, DMSO- $d_6$ )

172.762  
172.632

161.616  
159.201

141.613  
141.536

130.442  
130.389

124.937  
124.781

124.267  
124.236

115.009  
114.782

40.148

39.639

39.729

39.312

39.103

38.893

33.937

29.762

23.506

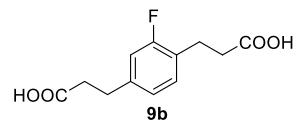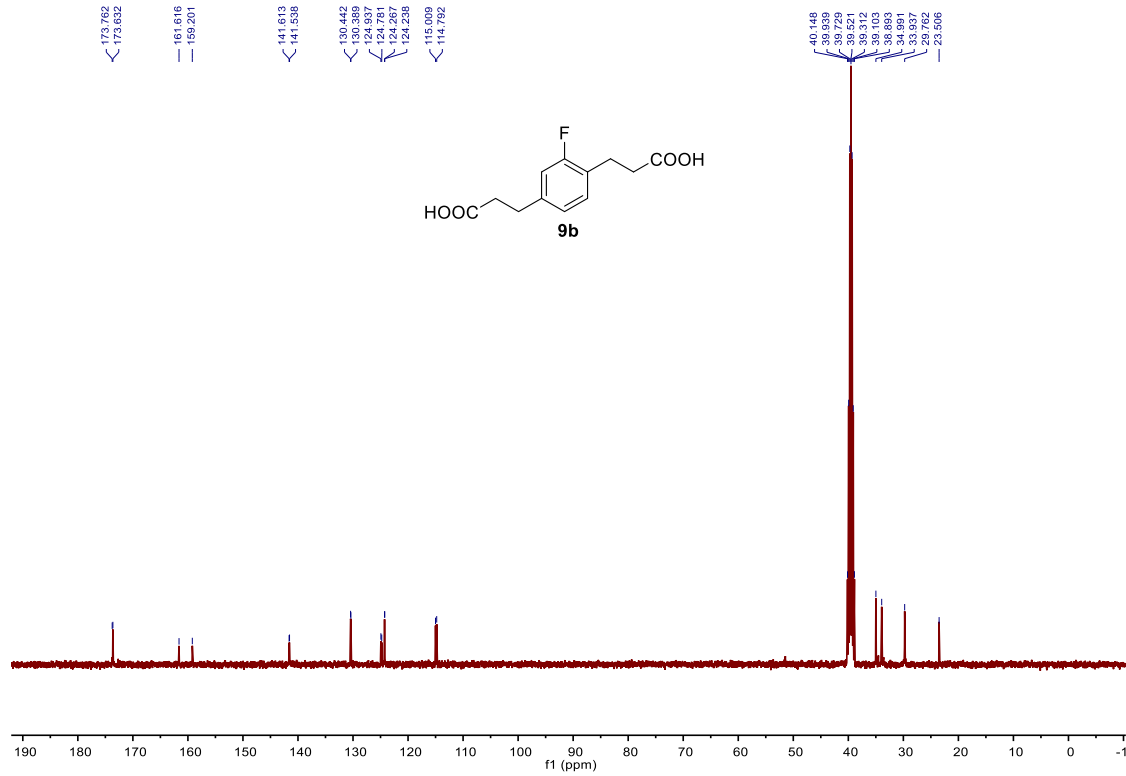



<sup>1</sup>H NMR (400 MHz, DMSO-d<sub>6</sub>)

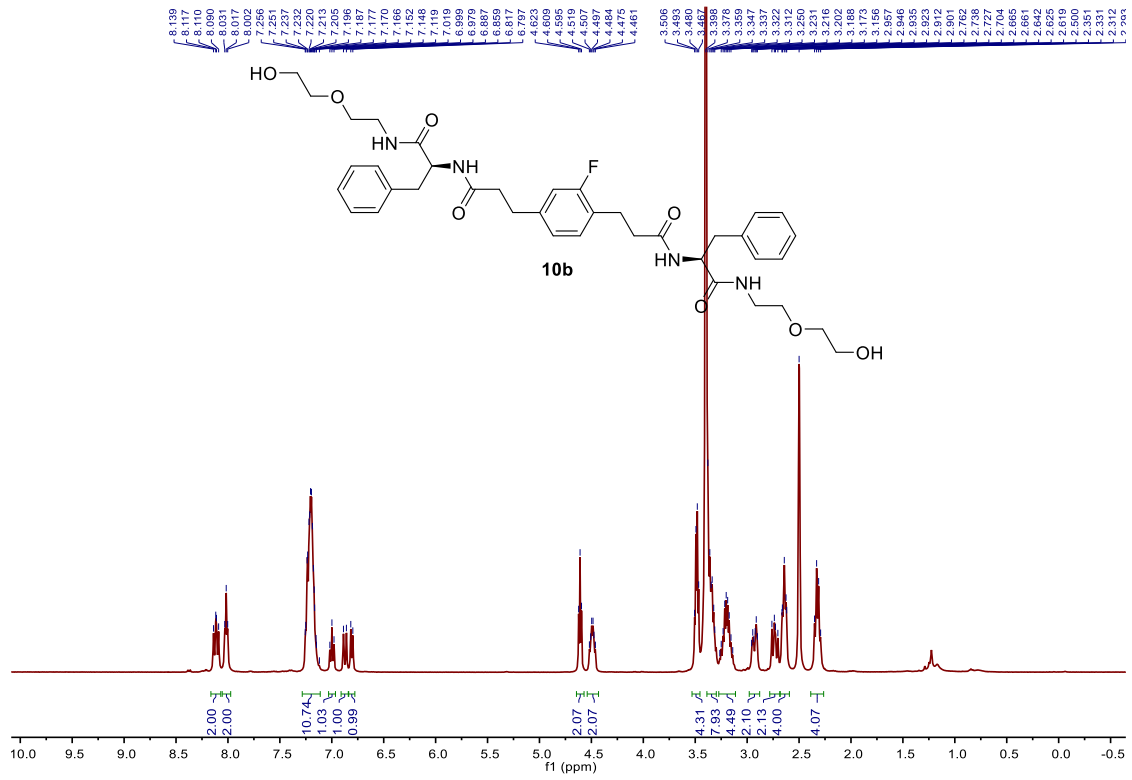

<sup>13</sup>C NMR (101 MHz, DMSO-d<sub>6</sub>)

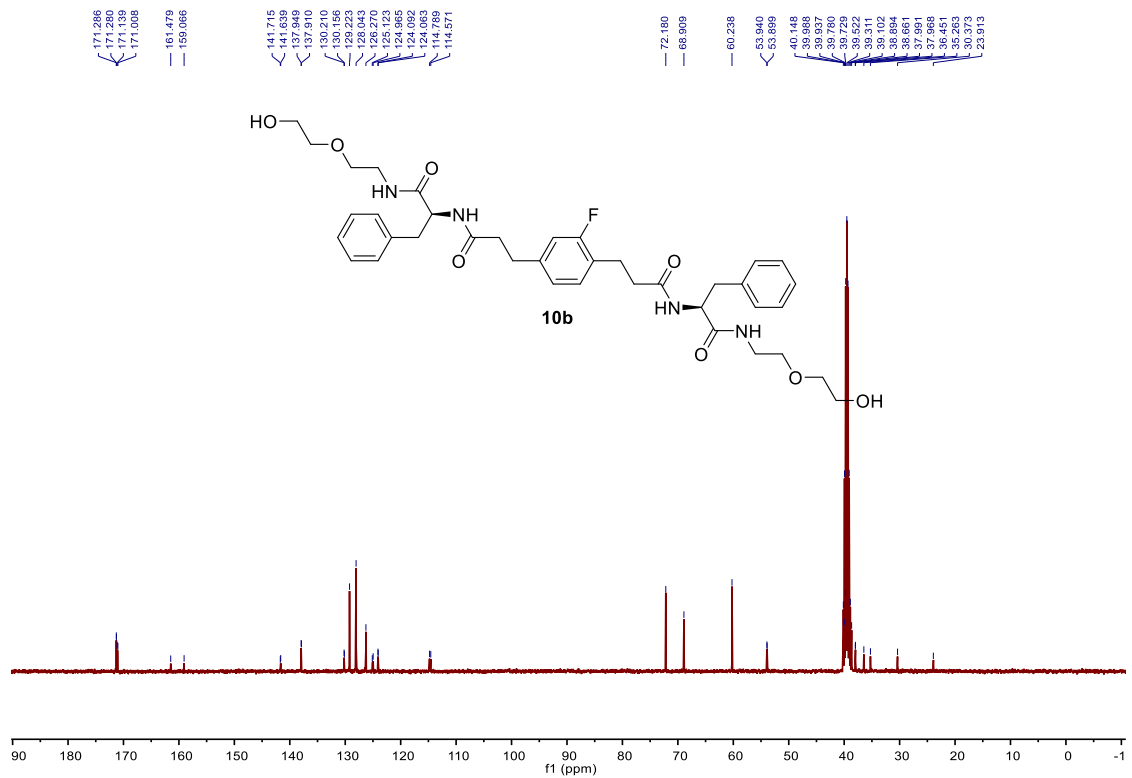

<sup>1</sup>H NMR (400 MHz, Chloroform-*d*)

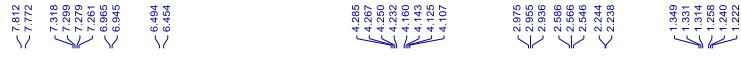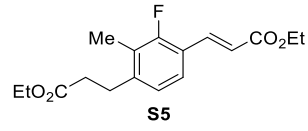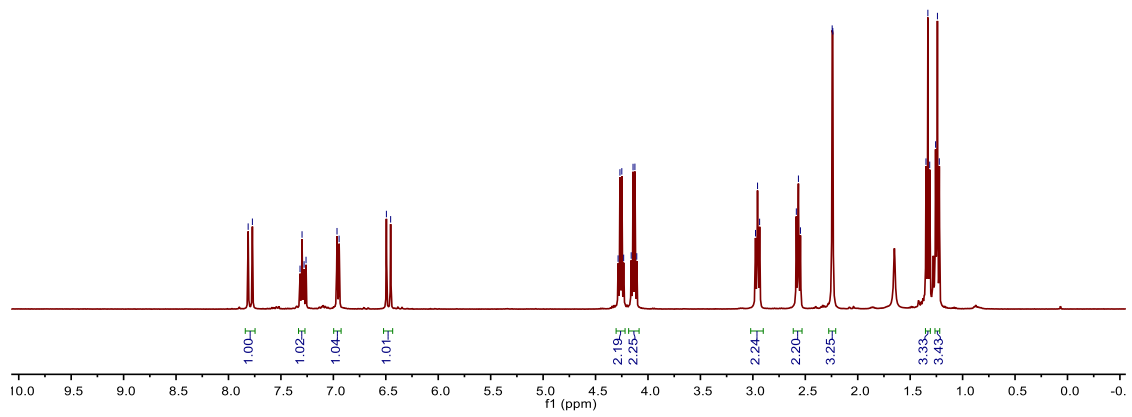

<sup>13</sup>C NMR (101 MHz, Chloroform-*d*)

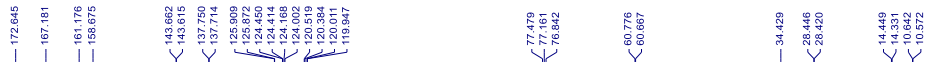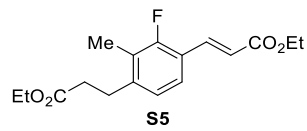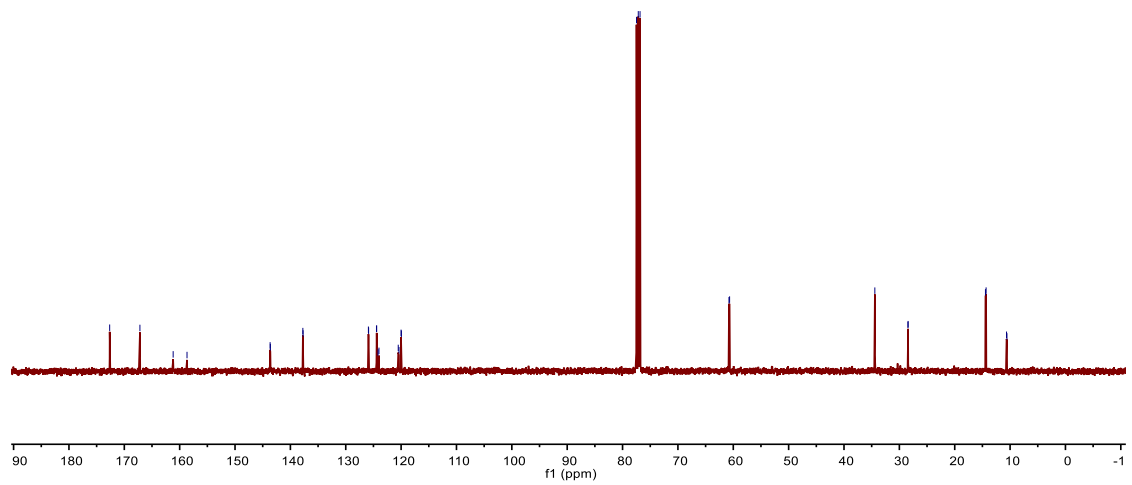

$^1\text{H}$  NMR (400 MHz,  $\text{DMSO-d}_6$ )

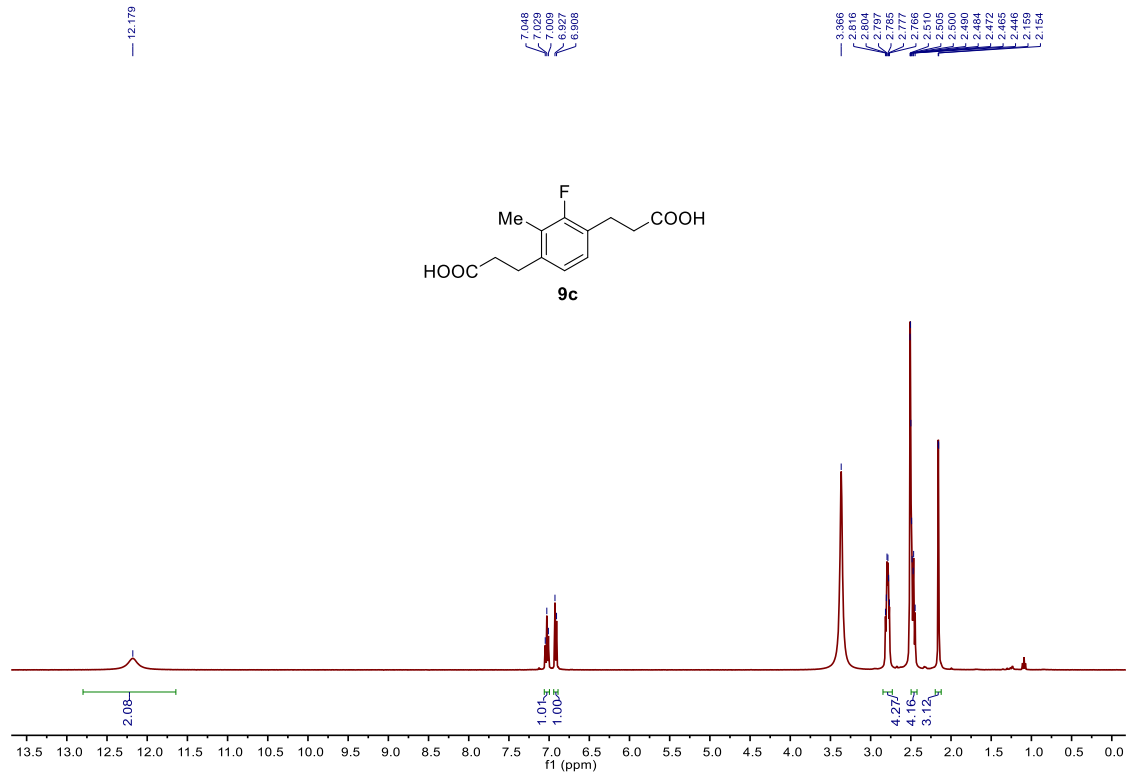

$^{13}\text{C}$  NMR (101 MHz,  $\text{DMSO-d}_6$ )

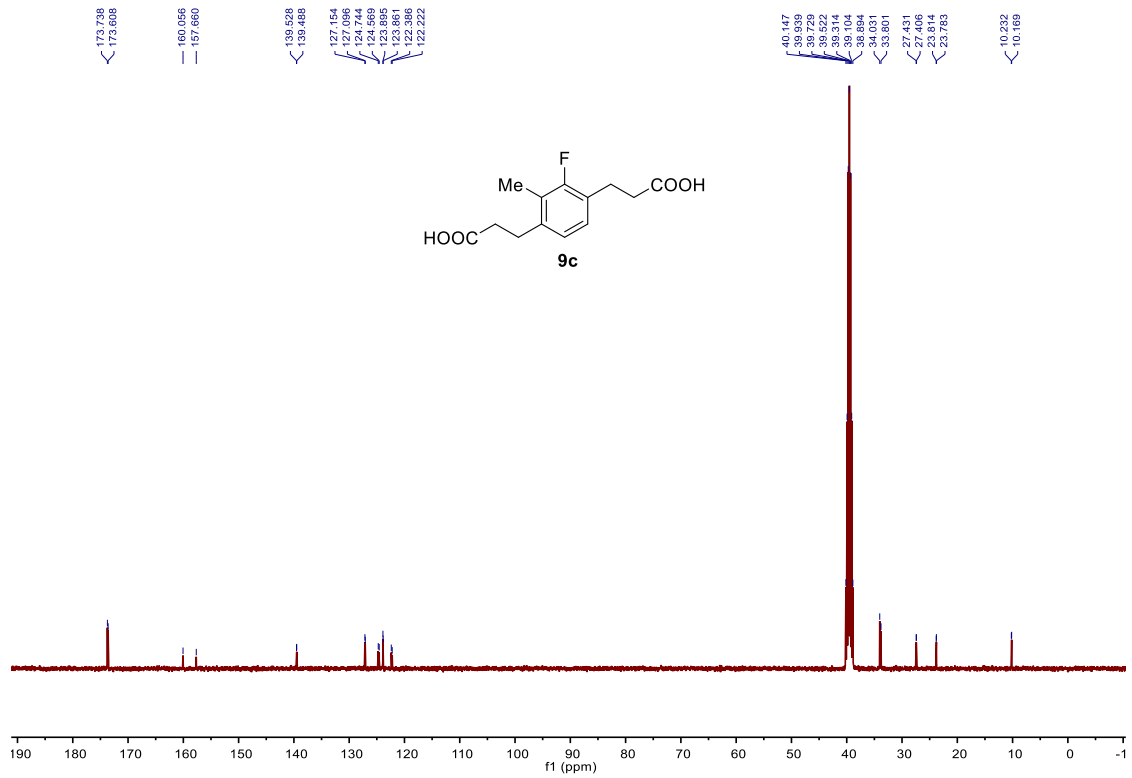

<sup>1</sup>H NMR (400 MHz, DMSO-d<sub>6</sub>)

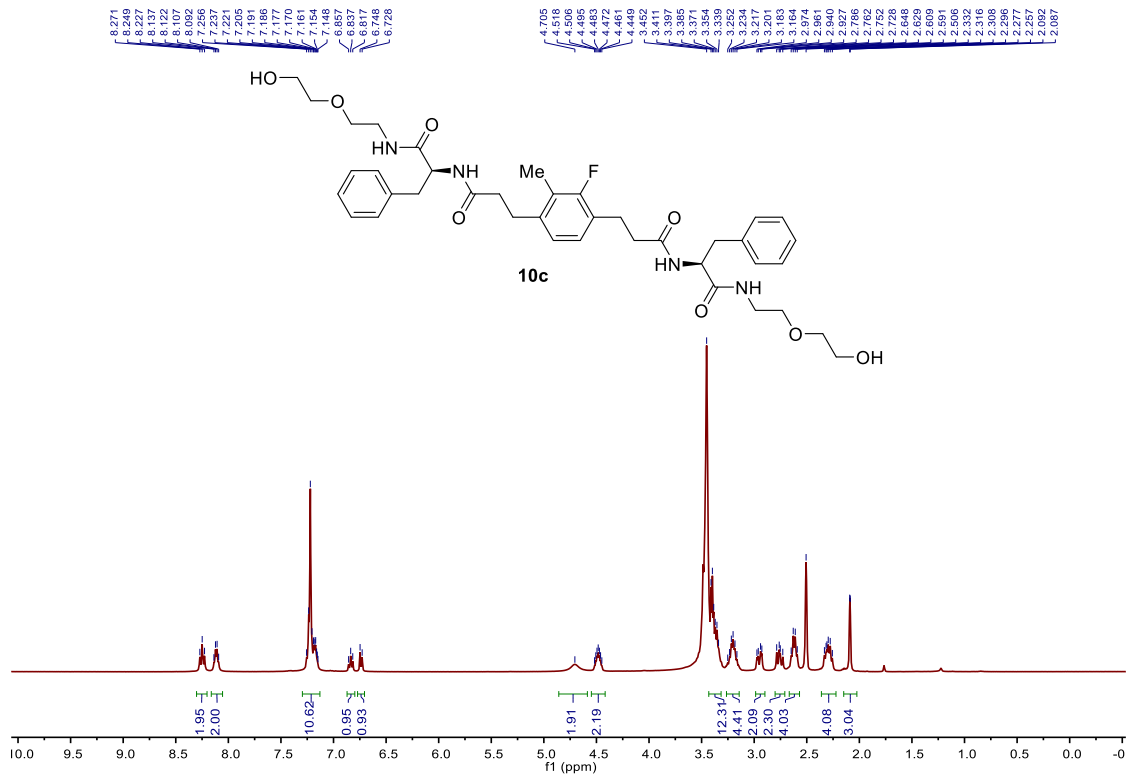

<sup>13</sup>C NMR (101 MHz, DMSO-d<sub>6</sub>)

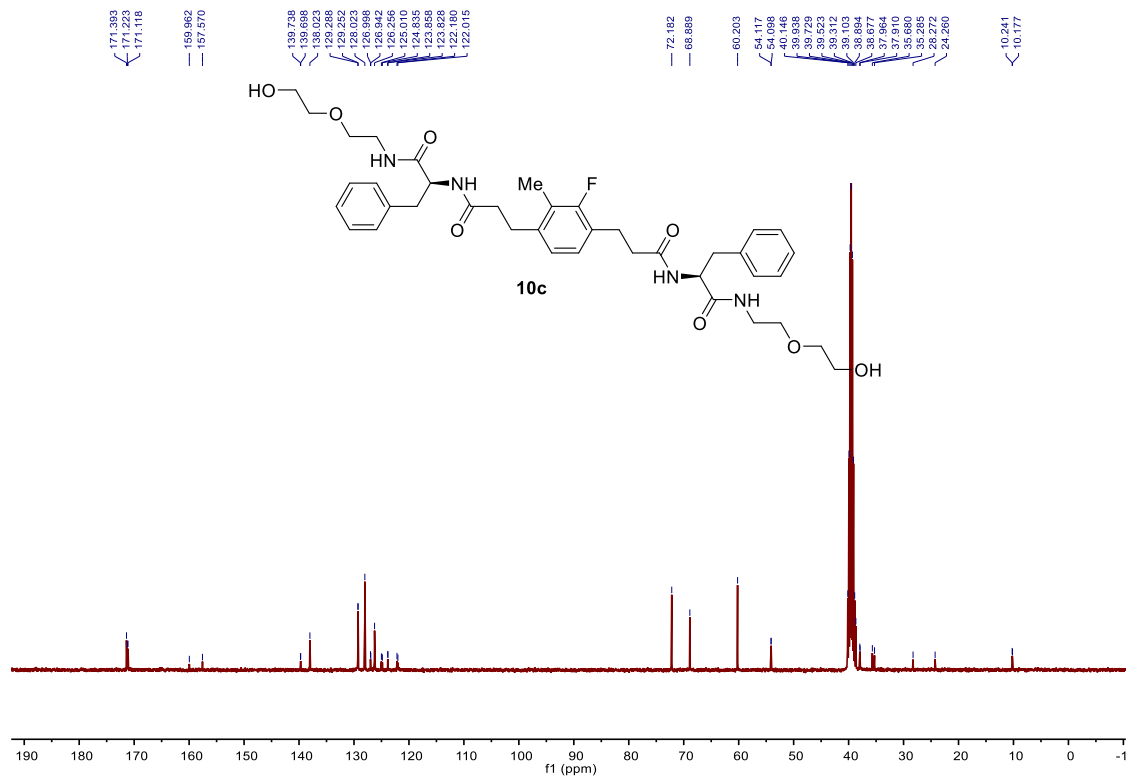

<sup>1</sup>H NMR (400 MHz, DMSO-d<sub>6</sub>)

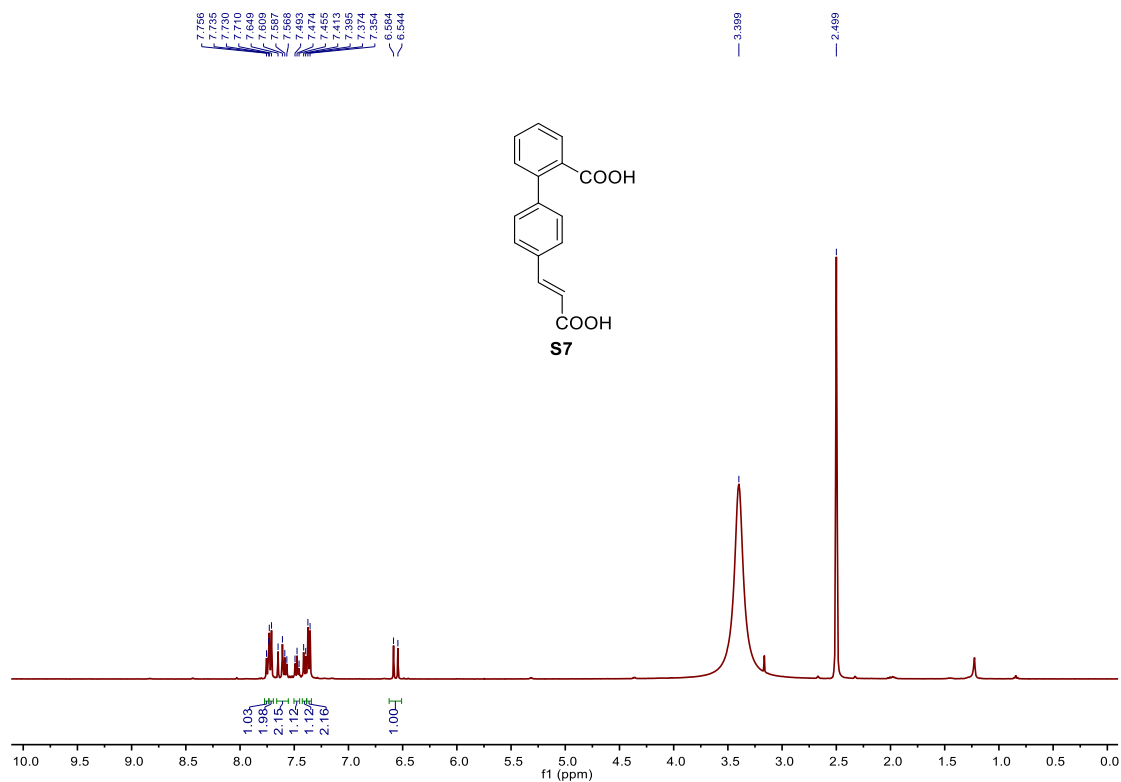

<sup>13</sup>C NMR (101 MHz, DMSO-d<sub>6</sub>)

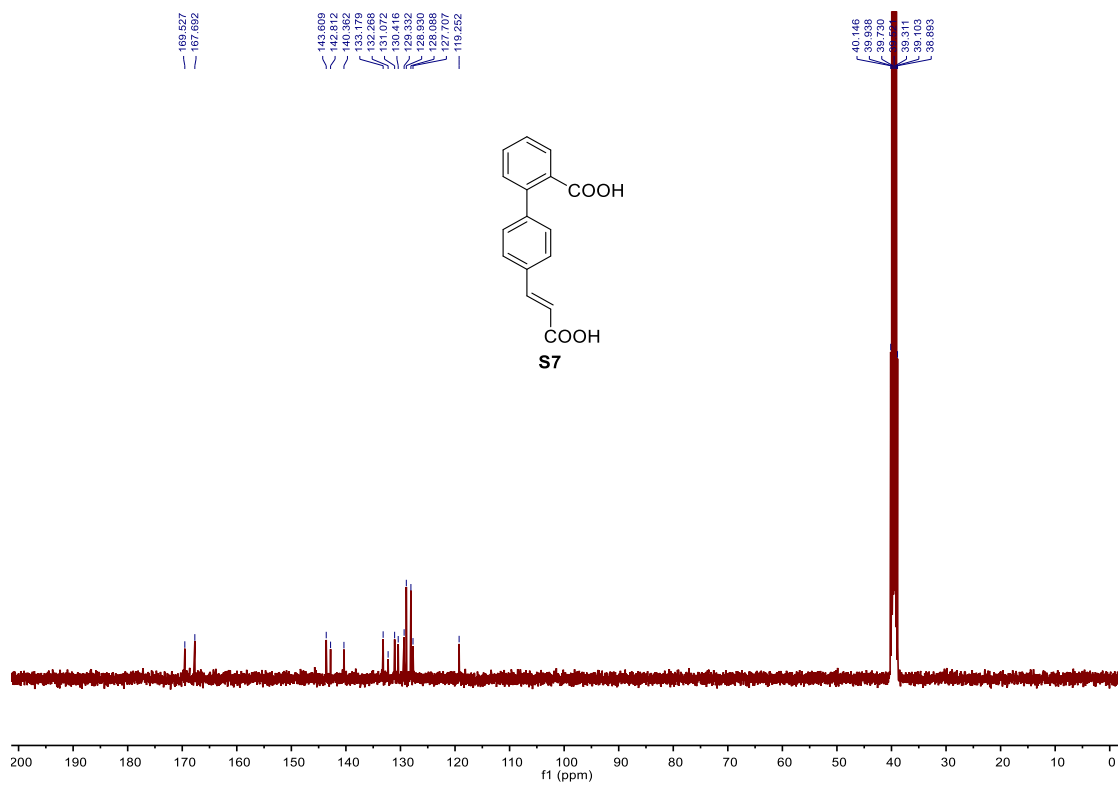

## 4 References

- (1) Yamamoto, T.; Murakami, R.; Suginome, M. Single-Handed Helical Poly(quinoxaline-2,3-diyl)s Bearing Achiral 4-Aminopyrid-3-yl Pendants as Highly Enantioselective, Reusable Chiral Nucleophilic Organocatalysts in the Steglich Reaction. *J. Am. Chem. Soc.* **2017**, *139*, 2557–2560.
- (2) Liu, J.; Yuan, F.; Ma, X.; Auphedeous, D. Y.; Zhao, C.; Liu, C.; Shen, C.; Feng, C-L. The Cooperative Effect of both Molecular and Supramolecular Chirality on Cell Adhesion. *Angew. Chem., Int. Ed.* **2018**, *57*, 6475.
